# Supplementary material for: Comprehensive exploration of the translocation, stability and substrate recognition requirements in VIM-2 lactamase
Source: eLife. 2020 Jun 8;9:e56707. doi: 10.7554/eLife.56707 (PMC7308095; doi:10.7554/eLife.56707)
Supplement: Supplementary file 2. — Includes the following: (A) Fitness scores for amino acid variants under all selection conditions, (B) EC50 measured from individually isolated variants, (C) Data used in linear models, (D) Fitness scores for codon variants selected under 128 µg/mL AMP, (E) Calculated RNA folding energy of signal peptide variants, (F) Temperature dependence classifications for the catalytic domain of VIM-2, (G) Hydrogen bonds found in the 5yd7 crystal structure, (H) Variants with positive fitness (>1) in all antibiotics, (I) All identified variants with altered specificity, (J) List of all VIM-type natural variants, (K) Mutations in VIM-type natural variants relative to wtVIM-2, and (L) Primers used to extract the VIM-2 gene for deep sequencing. [file elife-56707-supp2.xlsx]

## Sheet: Legend
Supplementary file 2A
Fitness scores after selection in all conditions. Fitness scores from the Gly2 (inhouse sequence only) are placed at the bottom.
Supplementary file 2B
EC50 values of individually isolated VIM-2 variants, measured through a sigmoidal fit of a dose-response curve.
Supplementary file 2C
Data used for linear models of fitness scores against biophysical parameters.
Supplementary file 2D
Fitness scores for codon variants under 128 ug/mL AMP selection.
Supplementary file 2E
Delta delta G (ddG) of signal peptide codon variants predicted by NUPACK.
Supplementary file 2F
All wt VIM-2 catalytic domain residues classified based on their inferred roles (temperature dependent, essential, tolerant, residue dependent)
Supplementary file 2G
Hydrogen bonds detected in the wtVIM-2 crystal structure (PDB:5yd7). Unique pairs (reciprocal pairs excluded) of atoms eligible for hydrogen bonding by angle and distance within chain A are listed. Each property is suffixed with '1' or '2', referring to the two different atoms involved in the bond.
Supplementary file 2H
List of globally positive variants (fitness > 1 in all antibiotics)
Supplementary file 2I
List of variants classified as having altered substrate specificity
Supplementary file 2J
List of natural VIM-type variant
Supplementary file 2K
List of all amino acid differences between each VIM-type variant and wtVIM-2
Supplementary file 2L
List of primers used to extract regions of the VIM-2 gene from variant libraries after a selection experiment, attaching the Nextera transposase adaptor sequence in the process.

## Sheet: SF2A Fitness Scores
labels						fitness scores	All standard deviations (SD) represent sample standard deviations with n=2. Values without SDs only contain a single replicate.
index	wt residue	position	variant residue	identity	group	128ug/mL_AMP_25C	128ug/mL_AMP_25C_SD	16ug/mL_AMP_25C	16ug/mL_AMP_25C_SD	2ug/mL_AMP_25C	2ug/mL_AMP_25C_SD	128ug/mL_AMP_37C	128ug/mL_AMP_37C_SD	16ug/mL_AMP_37C	16ug/mL_AMP_37C_SD	2ug/mL_AMP_37C	2ug/mL_AMP_37C_SD	4ug/mL_CTX_37C	4ug/mL_CTX_37C_SD	0.5ug/mL_CTX_37C	0.5ug/mL_CTX_37C_SD	0.031ug/mL_MEM_37C	0.031ug/mL_MEM_37C_SD
(p.Met.1.Ter)	M	1	*	var	1	-4.90449	1.13852	-2.16233	0.720858	0.0230171	0.0886682	-6.14399	0.463793	-2.00046	0.375424	0.0923989	0.12298	-2.57864	0.714119	-2.02223	0.432189	-2.98525	0.852559
(p.Met.1.Ala)	M	1	A	var	1	-6.78945	0.416583	-3.43708	0.140442	0.00724931	0.310917	-7.08182	0.184642	-3.06876	0.102199	0.028661	0.0525561	-3.2404	0.418196	-2.56452	0.168647	-3.63619	0.832643
(p.Met.1.Cys)	M	1	C	var	1	-5.46816	1.4668	-2.70702	0.224966	0.152024	0.298277	-7.72376	0.18444	-3.14637	0.0349548	-0.0187134	0.0455568	-2.88915	0.624192	-2.32777	0.734578	-3.46268	1.28467
(p.Met.1.Asp)	M	1	D	var	1	-6.8872	2.92398	-3.0927	0.836858	0.11962	0.14382	-8.42069	1.3672	-3.38219	0.116274	0.0822366	0.211816	-2.96212	0.382654	-2.61067	0.167578	-3.65309	0.344508
(p.Met.1.Glu)	M	1	E	var	1	-5.69502	0.973549	-0.30525	0.0368596	0.0060838	0.335266	-4.97266	0.0351561	-0.25561	0.0792809	-0.0498945	0.228025	-3.04619	0.790639	-0.719166	0.287977	-3.09361	1.21983
(p.Met.1.Phe)	M	1	F	var	1	-4.10583	2.33924	-3.5744	0.777098	-0.351945	0.036909	-6.48467	0.0433732	-3.72729	0.185388	-0.0609206	0.70837	-1.4761	0.362039	-2.20769	0.4625	-2.91811	0.625192
(p.Met.1.Gly)	M	1	G	var	1	-3.05562	0.705658	-0.627496	0.239593	0.0209441	0.292894	-2.71758	0.102593	-0.82311	0.127729	-0.0402683	0.00426751	-2.26476	0.173831	-0.834821	0.0842437	-1.98345	0.571794
(p.Met.1.His)	M	1	H	var	1	-5.77186	2.4154	-1.61625	0.340375	0.0380244	0.00109028	-7.00326	0.111891	-2.69932	0.524398	0.076627	0.153559	-2.55683	0.897598	-2.27123	0.537219	-3.18979	1.3574
(p.Met.1.Ile)	M	1	I	var	1	-2.17831	0.176652	-2.03521	0.353225	0.162662	0.00212336	-3.0658	0.113685	-1.83188	0.137023	0.0606034	0.139051	-2.30018	0.812356	-1.57556	0.375824	-2.10225	0.516827
(p.Met.1.Lys)	M	1	K	var	1	-2.42333	0.861286	-1.48529	0.63778	-0.215873	0.135618	-4.03949	0.0194243	-1.08203	0.064414	0.151628	0.142761	-2.54826	0.684977	-1.35211	0.274979	-3.0282	0.672611
(p.Met.1.Leu)	M	1	L	var	1	-2.61172	0.875014	-1.28354	0.690886	0.0864238	0.165742	-3.56783	0.211092	-1.34434	0.797674	0.180861	0.10424	-1.9757	1.12234	-1.0765	0.671682	-2.1553	1.15693
(p.Met.1.Asn)	M	1	N	var	1	-4.76358	3.01407	-1.08179	0.334818	0.0119795	0.499862	-4.90819	0.44079	-2.09197	0.650981	0.158306	0.160054	-3.08623	0.0950777	-1.54818	0.410902	-3.225	1.3704
(p.Met.1.Pro)	M	1	P	var	1	-6.46069	2.40927	-3.54047	0.984473	-0.0253657	0.290384	-8.9208	0.446024	-2.96683	0.4449	0.051938	0.247464	-2.24972	0.943815	-2.31772	0.997294	-3.26764	1.30151
(p.Met.1.Gln)	M	1	Q	var	1	-5.18858	1.82606	-2.61444	0.337816	-0.0774047	0.245629	-6.44517	0.236209	-2.71069	0.495111	-0.0138705	0.0415874	-2.71002	1.23033	-2.01594	0.975311	-3.14136	1.23761
(p.Met.1.Arg)	M	1	R	var	1	-4.94269	0.193571	-0.36058	0.0501759	0.0138377	0.088881	-4.31159	0.0207598	-0.301956	0.0398769	0.0462613	0.0184146	-2.77737	0.633916	-0.6073	0.133367	-2.76048	1.11834
(p.Met.1.Ser)	M	1	S	var	1	-5.13584	0.58136	-1.81849	0.155082	-0.00795456	0.136656	-5.83706	0.71892	-2.81116	0.166324	0.11693	0.0901087	-2.85196	0.600164	-2.22946	0.616888	-3.25914	1.04436
(p.Met.1.Thr)	M	1	T	var	1	-4.12188	0.625308	-2.31075	0.230438	-0.195633	0.223413	-2.84439	0.0134575	-1.96978	0.634216	-0.0142342	0.00592938	-2.23232	0.351518	-2.06009	0.36586	-2.38826	0.750853
(p.Met.1.Val)	M	1	V	var	1	-2.55536	0.0881445	-1.00673	0.0132725	0.0548844	0.115264	-3.37348	0.0464188	-0.968642	0.0805347	0.0635175	0.0631771	-2.21906	0.367812	-0.970484	0.0489414	-2.30446	1.06974
(p.Met.1.Trp)	M	1	W	var	1	-5.96028	0.567115	-1.25578	0.440276	-0.131637	0.0864127	-5.34157	0.347082	-0.857022	0.478496	0.0129994	0.0203083	-2.7354	0.741965	-1.28075	0.452037	-3.01924	1.20311
(p.Met.1.Tyr)	M	1	Y	var	1	-3.30481	1.6617	-1.11933	0.692961	0.276213	0.200813	-6.16268	0.969058	-2.50163	1.33179	0.215761	0.368214	-2.05779	1.15514	-2.26023	1.58625	-3.08155	1.55088
(p.Phe.2.Ter)	F	2	*	var	1	-3.59109	0.77698	-1.03994	0.0523842	0.0464164	0.0743632	-3.29875	0.359571	-1.24449	0.288444	0.172842	0.0370187	-2.39826	0.124914	-1.2541	0.147315	-2.66537	0.622696
(p.Phe.2.Ala)	F	2	A	var	1	-2.4243	0.74739	0.00223167	0.280676	-0.0824141	0.307071	-1.92523	0.208807	0.0214302	0.191598	0.043756	0.0577724	-1.8726	0.193261	-0.127924	0.164169	-1.36363	0.303364
(p.Phe.2.Cys)	F	2	C	var	1	-2.70844	0.677545	-0.584351	0.0285259	0.0297441	0.261	-2.89924	0.448431	-0.816089	0.46101	0.0295316	0.206445	-2.45254	0.586865	-1.3049	0.622015	-2.25016	0.430309
(p.Phe.2.Asp)	F	2	D	var	1	-2.59878	0.0431186	-0.0859782	0.109414	0.0559737	0.145724	-2.3685	0.0324946	-0.221107	0.156249	0.0711089	0.017522	-2.21869	0.451452	-0.638497	0.0806993	-2.26737	0.843573
(p.Phe.2.Glu)	F	2	E	var	1	-2.11781	0.958918	0.0109379	0.128975	0.00883649	0.274966	-1.80884	0.223115	0.0254071	0.137793	0.020928	0.12641	-1.66329	0.0461374	-0.113445	0.224009	-1.23121	0.481653
(p.Phe.2.Gly)	F	2	G	var	1	-0.254378	0.0996043	0.0196799	0.252894	0.0131482	0.329555	-0.115725	0.023954	-0.0629951	0.181368	-0.0337881	0.0204333	-0.290904	0.25231	-0.25409	0.186568	-0.137339	0.554406
(p.Phe.2.His)	F	2	H	var	1	-2.41011	0.0203809	0.154109	0.0057936	0.0245116	0.371789	-2.30221	0.384205	0.433635	0.247288	-0.112013	0.363099	-2.16299	0.189193	-0.217162	0.00816159	-1.70045	0.371097
(p.Phe.2.Ile)	F	2	I	var	1	-1.01156	2.16839	-0.127869	0.16282	-0.107717	0.244806	0.997753	0.30948	0.280619	0.420919	0.277674	0.518698	0.840101	0.0375965	0.0579668	0.517863	1.02102	0.42891
(p.Phe.2.Lys)	F	2	K	var	1	-0.394181	0.95772	0.00292832	0.0502175	-0.112869	0.0289696	0.747159	0.315893	0.182117	0.235688	0.0233625	0.297326	0.722531	0.385618	0.0476313	0.289363	1.00266	0.997596
(p.Phe.2.Leu)	F	2	L	var	1	-1.27735	0.117607	-0.110339	0.0269299	0.048826	0.198307	-1.5542	0.0294389	-0.0661049	0.133804	0.10573	0.00337544	-1.43903	0.136769	-0.207033	0.174151	-1.01185	0.0762459
(p.Phe.2.Met)	F	2	M	var	1	0.301065	0.262111	0.183458	0.00939343	0.117017	0.310357	0.512947	0.348651	0.109541	0.0525775	-0.0835733	0.100501	0.592656	0.132454	-0.142185	0.0906081	0.365286	0.953013
(p.Phe.2.Asn)	F	2	N	var	1	0.613096	0.537873	0.334333	0.779711	0.224125	0.123878	0.396574	0.847878	-0.0947189	0.430749	-0.26857	0.589012	0.457876	0.333712	-0.0300266	0.780268	0.327752	0.227728
(p.Phe.2.Pro)	F	2	P	var	1	-2.35089	0.343243	-1.38119	0.213863	0.0918306	0.266148	-3.04645	0.308778	-1.52541	0.511883	-0.0165224	0.133018	-2.0306	0.282116	-1.05828	0.0537015	-2.18561	0.0643487
(p.Phe.2.Gln)	F	2	Q	var	1	-2.99745	0.187178	-0.0213701	0.00954896	0.164496	0.255247	-3.50149	0.0307928	-0.396537	0.114972	-0.0816274	0.109483	-2.78289	0.246318	-0.558553	0.336515	-2.55296	0.540116
(p.Phe.2.Arg)	F	2	R	var	1	-2.34385	0.607077	-0.746397	0.141928	-0.0186141	0.255246	-2.17986	0.0720324	-0.822831	0.0159043	0.0542376	0.096899	-1.87251	0.181072	-0.913588	0.0549002	-1.60317	0.309765
(p.Phe.2.Ser)	F	2	S	var	1	-0.58479	0.0238812	-0.0605576	0.255511	-0.0492412	0.147309	-0.394134	0.123669	0.0815391	0.0270969	0.108804	0.0301032	-0.418343	0.13316	-0.056724	0.228266	-0.204234	0.175016
(p.Phe.2.Thr)	F	2	T	var	1	-1.52937	1.29143	0.0825831	0.0549571	-0.0290421	0.239287	-0.412522	0.203155	0.0600948	0.0135644	0.0586069	0.125325	-0.295941	0.315935	0.0614123	0.388619	-0.261337	0.443648
(p.Phe.2.Val)	F	2	V	var	1	-0.0414942	0.254123	0.06413	0.0194959	0.0960452	0.160078	0.254778	0.106944	-0.033819	0.038517	0.0171612	0.00431805	0.109216	0.251865	-0.137208	0.13334	0.17423	0.609213
(p.Phe.2.Trp)	F	2	W	var	1	-2.45286	0.186242	0.0359484	0.0953279	0.0806478	0.307128	-2.48146	0.171747	-0.0532915	0.0199596	0.0845167	0.0240734	-1.87087	0.0207556	-0.554984	0.0465078	-1.87092	0.407259
(p.Phe.2.Tyr)	F	2	Y	var	1	-1.30579	1.35095	0.0133422	0.0937192	-0.134079	0.43158	-0.573005	0.176363	-0.239335	0.210673	-0.0853376	0.059016	-0.42487	0.0661378	-0.271046	0.052568	-0.388124	0.103862
(p.Lys.3.Ter)	K	3	*	var	1	-4.54739	0.969836	-2.5958	0.269749	0.0241053	0.277978	-5.39636	0.0815158	-2.52893	0.244731	-0.159217	0.120005	-2.4087	0.882656	-1.76711	0.620834	-2.95838	0.632976
(p.Lys.3.Ala)	K	3	A	var	1	-4.04626	0.275816	-0.0697215	0.226789	0.19361	0.108389	-4.69601	0.346004	-0.571451	0.279514	-0.0208743	0.120002	-2.64633	1.04453	-1.01654	0.309584	-2.93477	0.730725
(p.Lys.3.Cys)	K	3	C	var	1	-1.11391	0.117391	0.0365868	0.26794	-0.0730185	0.124006	-0.779595	0.202409	0.263364	0.430221	0.0505601	0.177857	-0.513657	0.343807	-0.101167	0.165798	-1.43645	0.626973
(p.Lys.3.Asp)	K	3	D	var	1	-0.430302	0.132632	-0.0576703	0.0416553	-0.0333776	0.200399	-0.105872	0.289985	-0.08638	0.158257	0.0742038	0.00146542	-0.0325413	0.0827879	0.08427	0.323856	-0.0216802	0.192269
(p.Lys.3.Glu)	K	3	E	var	1	-1.22514	0.151073	0.201129	0.095333	0.0612803	0.172205	-1.42857	0.551891	0.1703	0.0350581	0.189783	0.137733	-1.21266	0.25263	0.238781	0.124356	-0.84419	0.690312
(p.Lys.3.Phe)	K	3	F	var	1	-0.865936	2.5548	-1.73819	2.54663	-0.391265	0.169899	-3.08238		-0.163237		0.720929		-2.69403		-0.838732		-2.73458
(p.Lys.3.Gly)	K	3	G	var	1	-5.82156	0.319316	-1.47468	0.0722702	-0.125787	0.0700605	-5.04511	0.0682402	-1.50053	0.122995	-0.179064	0.199276	-2.71468	0.471879	-1.13318	0.20347	-3.13156	1.03056
(p.Lys.3.His)	K	3	H	var	1	-2.10865	2.21155	0.00198694	0.540924	0.18795	0.880456	-4.08926	0.737455	-0.00420592	0.224904	-0.342336	0.382063	-2.56934	1.6901	-0.112017	0.300015	-3.46158	1.89985
(p.Lys.3.Ile)	K	3	I	var	1	0.0523151	0.844513	0.320113	0.463794	0.266009	0.371709	0.300408	0.249372	-0.045437	0.806543	0.212281	0.121046	0.553494	0.0252028	0.185755	0.65676	-0.430963	1.23712
(p.3.=)	K	3	K	syn	1	-0.255615	0.377564	-0.161634	0.243379	-0.193937	0.049267	0.010268	0.055916	0.121093	0.171395	-0.0399259	0.166804	-0.0969637	0.0460571	-0.234037	0.156392	-0.217637	0.123572
(p.Lys.3.Leu)	K	3	L	var	1	-3.52026	0.601344	-0.712272	0.00608687	-0.0441786	0.109286	-4.6733	0.688831	-0.981729	0.344459	-0.375657	0.0247285	-2.60682	1.06091	-0.85783	0.478088	-2.91745	1.6379
(p.Lys.3.Met)	K	3	M	var	1	0.209477	0.248599	0.232131	0.068729	-0.00246109	0.306545	0.0033516	0.283367	-0.282096	0.0722185	-0.180477	0.139434	0.250525	0.50854	-0.0773874	0.406464	-0.418346	0.447229
(p.Lys.3.Asn)	K	3	N	var	1	0.497706	0.0910242	0.0842187	0.121338	0.0613758	0.408686	0.259176	0.191063	-0.296002	0.280637	-0.225816	0.0236593	0.565271	0.283419	-0.020517	0.394833	0.349115	0.583022
(p.Lys.3.Pro)	K	3	P	var	1	-2.52509	1.35017	-0.1395	0.0287683	-0.127678	0.185049	-3.41487	0.539389	0.41851	0.288681	0.20798	0.37675	-2.33721	0.807442	0.104818	0.222986	-3.39041	2.65904
(p.Lys.3.Gln)	K	3	Q	var	1	-2.99438	0.564149	-0.163125	0.322003	-0.263765	0.373266	-2.86214	0.0831172	0.336377	0.00859084	0.189512	0.00756345	-2.07314	0.773415	-0.0568711	0.290423	-2.06171	1.11938
(p.Lys.3.Arg)	K	3	R	var	1	-3.37436	0.351897	-0.46335	0.066319	-0.0390654	0.0509174	-3.30866	0.15578	-0.450748	0.0336347	-0.0437072	0.0161156	-2.29738	0.559167	-0.533373	0.110495	-2.17975	1.00772
(p.Lys.3.Ser)	K	3	S	var	1	-0.149546	0.360202	0.124589	0.0634649	-0.13147	0.471127	-0.455542	0.253675	0.118365	0.0861445	0.120138	0.258318	-0.44	0.376184	-0.217998	0.0116192	-0.426057	0.453255
(p.Lys.3.Thr)	K	3	T	var	1	0.100225	0.481138	0.189641	0.16839	-0.0100665	0.0376129	-0.205095	0.307218	0.0612648	0.724734	-0.112453	0.597915	-0.086234	0.018171	0.00669404	0.64534	-0.170251	0.00780945
(p.Lys.3.Val)	K	3	V	var	1	-4.195	1.36112	0.107041	0.0323965	-0.0207852	0.0651779	-3.14383	0.543773	0.0612571	0.0819853	-0.0612789	0.0997076	-2.47536	0.787114	0.0396804	0.236981	-2.25998	1.46708
(p.Lys.3.Trp)	K	3	W	var	1	-3.84952	0.0818768	0.0700004	0.0612394	-0.0339664	0.109224	-3.32206	0.139988	-0.0984472	0.233176	0.0220508	0.0671899	-2.2633	0.44445	0.0198944	0.0967263	-2.38361	1.47343
(p.Lys.3.Tyr)	K	3	Y	var	1	0.891351	0.797339	0.422772	0.194921	0.0735405	1.6545	-1.55407	0.411705	-0.116739	0.46189	-0.591651	0.109687	-0.498946	0.882956	-0.645574	0.528535	-0.587349	1.29085
(p.Leu.4.Ter)	L	4	*	var	1	-3.98266	0.795051	-2.80065	0.162893	0.0754791	0.132854	-3.09863	0.0600946	-2.60577	0.526133	-0.0663538	0.117366	-1.99625	0.577844	-2.13035	0.524606	-2.21229	0.350599
(p.Leu.4.Ala)	L	4	A	var	1	0.219883	0.227556	0.0216816	0.0268827	0.113013	0.0102841	0.403454	0.104886	0.100963	0.011643	-0.0289219	0.12286	0.623877	0.0918536	-0.0836135	0.0947216	0.632421	0.867498
(p.Leu.4.Cys)	L	4	C	var	1	-0.0425829	0.625283	0.112753	0.0233625	-0.251579	0.257978	0.700326	0.469797	0.0799101	0.122717	0.0787243	0.209084	1.05791	0.288775	-0.0456898	0.0708842	0.990831	0.889133
(p.Leu.4.Asp)	L	4	D	var	1	0.146318	0.416827	0.054644	0.491578	0.00136166	0.291634	0.210343	0.0989958	0.119335	0.0296665	0.177633	0.0653931	0.66187	0.0351701	0.0879739	0.268333	0.783315	0.545807
(p.Leu.4.Glu)	L	4	E	var	1	0.0435577	0.502102	-0.0568685	0.142557	0.0301591	0.0787435	0.411802	0.216835	-0.0490198	0.248836	-0.020055	0.132691	0.580158	0.175652	-0.0056912	0.0981163	0.445084	0.655428
(p.Leu.4.Phe)	L	4	F	var	1	0.293946	0.430565	0.198477	0.19223	0.143569	0.252484	0.263195	0.054647	-0.616916	0.0690435	-0.402384	0.0293351	0.416578	0.175162	-0.274374	0.152029	1.00354	1.05255
(p.Leu.4.Gly)	L	4	G	var	1	-1.35928	0.664267	-0.056993	0.127561	0.00349143	0.0685751	-1.325	0.0888537	-0.0328364	0.0807966	0.00287583	0.144054	-1.00544	0.190715	-0.11743	0.0468277	-0.707511	0.265664
(p.Leu.4.His)	L	4	H	var	1	-0.238016	0.470034	-0.292024	0.0231999	-0.332394	0.0570002	1.01391	0.667618	0.162734	0.431879	0.230106	0.335433	1.06683	0.732567	-0.013714	0.206147	1.01953	1.2097
(p.Leu.4.Ile)	L	4	I	var	1	0.810327	0.0130654	0.353684	0.384339	0.295128	0.258933	0.605516	0.211473	0.00433084	0.0549892	0.0686445	0.230151	1.09763	0.171663	-0.0148275	0.169015	1.17995	1.06772
(p.Leu.4.Lys)	L	4	K	var	1	0.562852	0.212833	-0.0628166	0.0793428	-0.114009	0.0408313	0.566009	0.365582	0.00677402	0.0771221	0.042875	0.0770264	0.956363	0.0949236	-0.235478	0.197516	1.31014	1.43789
(p.4.=)	L	4	L	syn	1	0.17324	0.271553	0.0597993	0.139346	0.0547012	0.181985	0.493703	0.220149	0.0905782	0.0328964	0.0703993	0.116518	0.566227	0.123717	0.0662508	0.156353	0.523395	0.770084
(p.Leu.4.Met)	L	4	M	var	1	0.501462	0.0661884	-0.0918378	0.00859412	0.152573	0.326762	0.786747	0.143108	0.0843286	0.174494	-0.0936677	0.165203	1.07819	0.087451	-0.225142	0.0946899	1.29277	1.10555
(p.Leu.4.Asn)	L	4	N	var	1	-0.182544	0.548483	-0.468748	0.207569	0.240648	0.236297	0.839728	0.0697586	0.180042	0.120161	-0.117005	0.269599	1.05211	0.227338	0.140005	0.302298	1.48462	0.911633
(p.Leu.4.Pro)	L	4	P	var	1	0.250433	0.0865113	0.156749	0.299512	0.0219136	0.384345	0.119687	0.210658	-0.274499	0.119212	-0.289812	0.0812771	0.302573	0.282553	-0.354254	0.175418	0.161026	0.684379
(p.Leu.4.Gln)	L	4	Q	var	1	0.221807	0.693924	-0.0474245	0.330016	0.00631933	0.32458	0.890687	0.308858	0.127224	0.008334	0.0524422	0.0496678	1.06707	0.0850386	0.0340185	0.146446	1.23002	1.13123
(p.Leu.4.Arg)	L	4	R	var	1	-0.0153607	0.387863	0.0803114	0.0493525	0.13351	0.0127492	0.32543	0.15166	0.145266	0.0508498	0.0987313	0.0746617	0.487916	0.0664322	0.00973954	0.0244674	0.574674	0.642784
(p.Leu.4.Ser)	L	4	S	var	1	0.307703	0.299289	-0.0118449	0.0176994	-0.011406	0.00811776	0.721342	0.246373	0.16075	0.0466836	0.147036	0.0919455	1.12639	0.00982925	-0.0786821	0.0914105	1.13699	0.967434
(p.Leu.4.Thr)	L	4	T	var	1	0.520622	0.00321501	0.0724223	0.0276091	0.0957593	0.211395	0.85528	0.323168	0.0172851	0.173441	0.133903	0.0500944	1.07406	0.243472	-0.240783	0.0862861	1.19215	1.28422
(p.Leu.4.Val)	L	4	V	var	1	0.551372	0.39217	0.0443253	0.302324	0.0857971	0.404051	0.713564	0.258596	-0.0522798	0.00952793	-0.0894305	0.14317	0.884206	0.088532	-0.150083	0.0487081	0.930027	0.83966
(p.Leu.4.Trp)	L	4	W	var	1	0.256317	0.257544	0.128564	0.21896	-0.0169359	0.0284362	0.463498	0.0492874	0.152554	0.0856077	0.0250529	0.0266643	0.401234	0.0598285	0.0988473	0.00977433	0.333715	0.00338377
(p.Leu.4.Tyr)	L	4	Y	var	1	-0.376675	1.13669	0.0360685	0.381488	0.126617	0.00679	0.764031	0.232545	0.391647	0.15655	-0.0794248	0.0673778	0.937723	0.0862858	-0.00912157	0.314953	0.932946	0.916646
(p.Leu.5.Ter)	L	5	*	var	1	-3.99462	1.21878	-2.87654	0.0948842	-0.253626	0.103306	-3.82223	0.37243	-2.77558	0.561844	-0.311281	0.626421	-2.5178	0.795862	-1.8529	0.439771	-2.65935	0.938184
(p.Leu.5.Ala)	L	5	A	var	1	0.304776	0.567501	0.0537909	0.191331	0.0694829	0.068275	0.536449	0.118192	0.024371	0.00680179	-0.0105182	0.0268206	0.513988	0.124706	-0.0703823	0.0495428	0.497562	0.390052
(p.Leu.5.Cys)	L	5	C	var	1	0.813715	0.119107	0.0172527	0.142241	0.0191189	0.0546841	0.802409	0.180425	0.107273	0.000596634	0.0963353	0.10732	1.05388	0.098851	0.0364602	0.159156	0.838116	0.807963
(p.Leu.5.Asp)	L	5	D	var	1	0.183978	0.479872	0.254343	0.161806	0.0202045	0.0987749	0.380339	0.0420825	0.00204493	0.118876	0.0919561	0.0167313	0.436465	0.109151	0.152992	0.223198	0.285716	0.410749
(p.Leu.5.Glu)	L	5	E	var	1	0.555356	0.0528274	-0.0286913	0.172742	0.0540121	0.0542472	0.614894	0.26028	-0.106797	0.0825456	-0.0868322	0.027369	0.779642	0.116526	-0.0904708	0.0783733	0.821618	0.746249
(p.Leu.5.Phe)	L	5	F	var	1	-0.959877	0.369717	0.0293481	0.502229	-0.0692984	0.530376	-0.830463	0.138956	-0.0228187	0.179948	0.0860518	0.0423175	-0.784826	0.100134	0.0428638	0.0600333	-0.571939	0.355462
(p.Leu.5.Gly)	L	5	G	var	1	-0.179194	0.667978	0.0698698	0.0699115	0.0329106	0.0383159	-0.0475321	0.00975388	0.0638884	0.0679033	0.00466403	0.0815616	0.0269885	0.0104608	-0.0600698	0.0620963	0.0464903	0.145069
(p.Leu.5.His)	L	5	H	var	1	-1.34176	1.68312	0.127318	0.450512	0.352114	0.482024	-1.58301	0.639315	0.0187922	0.309018	0.0841475	0.192692	-1.30579	0.48215	0.046835	0.0210678	-1.06188	0.57936
(p.Leu.5.Ile)	L	5	I	var	1	-1.35475	1.36854	-0.110014	0.00771261	-0.0438683	0.289761	-0.928582	0.107778	-0.109188	0.205428	-0.0687614	0.264183	-0.504261	0.110885	0.0212554	0.0517704	-0.752823	0.423194
(p.Leu.5.Lys)	L	5	K	var	1	0.165809	0.628862	-0.0808756	0.180038	0.0677643	0.139874	0.570408	0.15093	-0.304766	0.134858	-0.162671	0.263708	0.957203	0.0929353	-0.33714	0.0210338	0.957031	1.06825
(p.5.=)	L	5	L	syn	1	-1.19114	0.058141	0.0668426	0.00625728	0.020084	0.0475484	-1.77923	0.00831236	0.161917	0.18255	-0.000383268	0.193788	-1.33966	0.251894	0.0842753	0.119423	-0.900207	0.506292
(p.Leu.5.Met)	L	5	M	var	1	0.225615	0.0436282	0.0460838	0.0030399	0.0693284	0.0291925	0.316572	0.0804673	-0.151082	0.270952	-0.132793	0.0737593	0.189292	0.0208727	-0.0900424	0.0287609	0.153789	0.304351
(p.Leu.5.Asn)	L	5	N	var	1	0.35692	0.554501	0.405837	0.255994	0.31127	0.121206	0.680557	0.173801	-0.245224	0.0861613	-0.151384	0.00460223	0.625511	0.292384	-0.0148275	0.213644	0.573681	0.456778
(p.Leu.5.Pro)	L	5	P	var	1	-0.615635	0.702715	-0.0564241	0.138898	-0.0995082	0.244757	-1.01089	0.55355	0.0548599	0.0247528	-0.071529	0.159016	-0.937383	0.431628	-0.0591762	0.0602319	-0.974381	0.846083
(p.Leu.5.Gln)	L	5	Q	var	1	-0.879065	0.742719	-0.186325	0.254787	-0.302044	0.0716439	-0.660196	0.0580005	-0.00258129	0.230516	-0.203901	0.382626	-0.449532	0.27966	-0.210087	0.0401596	-0.488928	0.0442761
(p.Leu.5.Arg)	L	5	R	var	1	-0.81234	1.00809	0.127332	0.24694	0.107344	0.143345	-0.82119	0.225195	-0.000746635	0.0661603	-0.0766799	0.0422035	-0.848835	0.147548	-0.110549	0.101048	-0.505093	0.209968
(p.Leu.5.Ser)	L	5	S	var	1	0.475243	0.194747	0.149417	0.0818898	0.079373	0.179359	0.697433	0.156285	0.13093	0.0190632	0.078701	0.0575504	0.582659	0.0508296	-0.103667	0.00606889	0.653783	0.37785
(p.Leu.5.Thr)	L	5	T	var	1	-2.13542	1.71035	0.0361763	0.115969	-0.0926847	0.363812	-1.65863	0.191443	-0.0377864	0.0862143	0.0445656	0.0414066	-1.02328	0.313833	0.0107864	0.0121651	-0.84669	0.516263
(p.Leu.5.Val)	L	5	V	var	1	0.395319	0.399091	0.0324583	0.193757	0.00979102	0.0775171	0.585178	0.0312627	0.0497328	0.0234847	0.0203044	0.0715798	0.548689	0.0142827	0.0302195	0.0764828	0.356431	0.229513
(p.Leu.5.Trp)	L	5	W	var	1	-0.304283	0.47438	0.113083	0.181758	0.0602714	0.164088	-0.435539	0.154802	-0.0664847	0.18013	-0.0348482	0.109256	-0.574183	0.00434464	-0.119517	0.0107646	-0.418127	0.149628
(p.Leu.5.Tyr)	L	5	Y	var	1	-0.160153	1.2201	0.362734	0.19406	0.105549	0.269272	0.748826	0.0704881	0.0249523	0.0258294	0.117154	0.182073	0.545834	0.378559	-0.393522	0.212484	0.55469	0.273856
(p.Ser.6.Ter)	S	6	*	var	1	-3.72956	0.414842	-3.00198	0.152897	0.0633709	0.21682	-4.97979	0.544145	-2.30918	0.491575	-0.0157269	0.101043	-2.86958	1.30399	-1.86458	0.034585	-2.80781	0.690602
(p.Ser.6.Ala)	S	6	A	var	1	-0.797969	0.568415	0.063579	0.0424233	-0.0317429	0.18659	-0.731059	0.2812	0.00170782	0.0850851	-0.00776834	0.103053	-0.741843	0.215548	-0.0287894	0.0720779	-0.459738	0.514992
(p.Ser.6.Cys)	S	6	C	var	1	0.321307	0.136971	0.0342833	0.031621	0.0638577	0.0823086	0.420051	0.228726	-0.0918196	0.0377296	-0.183242	0.248921	0.57732	0.047288	-0.118254	0.0865857	0.122678	0.418833
(p.Ser.6.Asp)	S	6	D	var	1	-2.40967	1.23704	0.0814869	0.326226	0.174148	0.152735	-2.86453	0.129674	0.298945	0.11967	0.0339072	0.138512	-2.03734	0.165189	0.00530855	0.110086	-1.40303	0.948279
(p.Ser.6.Glu)	S	6	E	var	1	-0.441724	0.744347	0.137725	0.169587	0.111905	0.22436	-0.393307	0.652949	0.0474144	0.054174	0.0417405	0.202079	-0.54986	0.264888	0.129488	0.0778489	-0.371269	0.421905
(p.Ser.6.Phe)	S	6	F	var	1	-0.930302	0.232978	-0.198265	0.532158	0.16495	0.370875	-0.0108427	0.299741	0.428816	0.169684	0.471354	0.0878105	-0.468488	0.658305	0.239214	0.0138239	-0.227581	0.620601
(p.Ser.6.Gly)	S	6	G	var	1	-1.74569	1.1035	-0.230576	0.116964	0.0777581	0.0549725	-1.75276	0.444915	-0.177606	0.000545252	0.114444	0.196673	-1.48836	0.351136	-0.167804	0.000179336	-1.24411	0.777813
(p.Ser.6.His)	S	6	H	var	1	-0.59506	1.51769	-0.0217121	0.276186	-0.197475	0.614525	-0.00933753	0.179462	0.166567	0.11289	-0.0887895	0.433961	-0.0665218	0.140964	0.0862548	0.307217	-0.19567	0.501933
(p.Ser.6.Ile)	S	6	I	var	1	-0.594364	0.385245	0.512755	0.10139	0.0327336	0.0830263	-0.75305	0.110008	0.0508855	0.556578	0.461456	0.676829	-0.346124	0.476015	0.0704819	0.112133	-0.173848	0.58445
(p.Ser.6.Lys)	S	6	K	var	1	-0.394824	1.13434	0.401983	0.347231	-0.0109564	0.0567427	-0.177395	0.00270069	0.181752	0.137266	0.116086	0.305862	-0.22622	0.620954	-0.00330739	0.15697	-0.453663	0.36565
(p.Ser.6.Leu)	S	6	L	var	1	-1.58179	0.675464	0.0987115	0.3228	-0.00607058	0.327581	-1.75026	0.190548	-0.0858328	0.0877809	-0.231595	0.245177	-1.49151	0.00725846	-0.338763	0.0649123	-1.46865	0.672781
(p.Ser.6.Met)	S	6	M	var	1	-0.868336	0.417786	-0.15563	0.234353	-0.218417	0.0182109	-0.909341	0.320878	0.244986	0.324148	0.203175	0.506024	-0.568469	1.31993	0.366653	0.0754935	-0.391961	0.285243
(p.Ser.6.Asn)	S	6	N	var	1	-0.907416		-0.38693		-0.364237		-0.490158	0.0468129	-0.0675448	0.222136	-0.464702	0.296009	-0.505194	0.0994991	-0.310724	0.251632	-0.377674	0.537568
(p.Ser.6.Pro)	S	6	P	var	1	-0.669601	0.791596	0.426462	0.0085383	-0.363448	0.240872	-0.306024	0.0977749	-0.0415483	0.199893	-0.0343372	0.197891	-0.527794	0.0333605	0.0140732	0.189486	-0.407444	0.431013
(p.Ser.6.Gln)	S	6	Q	var	1	0.0642384	0.280398	-0.368483	0.576928	-0.676726	0.237728	-0.0109276	0.0399326	0.0879977	0.121125	0.278602	0.151785	-0.183887	0.0320017	-0.188579	0.374285	-0.424051	0.312228
(p.Ser.6.Arg)	S	6	R	var	1	-1.17013	0.327066	-0.000369828	0.0407298	-0.00867651	0.0923177	-0.916271	0.156244	0.170601	0.0348864	0.0329988	0.000653561	-0.968955	0.330681	-0.0113466	0.135587	-0.68405	0.482317
(p.6.=)	S	6	S	syn	1	0.0115315	0.429371	0.10825	0.293335	0.0146018	0.0926758	0.14999	0.0455748	-0.248287	0.127331	-0.209605	0.0171792	0.00744082	0.0134353	-0.253691	0.204309	-0.20438	0.0306242
(p.Ser.6.Thr)	S	6	T	var	1	-1.50694	0.987349	-0.0452759	0.273728	0.0166094	0.0939476	-1.10986	0.106553	0.129968	0.0488206	0.132774	0.263504	-0.954389	0.370299	-0.0803875	0.127801	-1.02126	0.48617
(p.Ser.6.Val)	S	6	V	var	1	-0.292892	0.54746	0.0892257	0.0624722	0.105581	0.175152	-0.40362	0.305541	0.131031	0.00620957	0.0329841	0.132847	-0.35585	0.266484	-0.0245512	0.099023	-0.363185	0.383623
(p.Ser.6.Trp)	S	6	W	var	1	-0.0769307	0.51053	0.0640492	0.0606625	0.00638727	0.00816425	0.105628	0.163844	0.0251756	0.0389734	0.167776	0.0537233	0.0784335	0.130222	-0.0154185	0.2517	-0.0519607	0.0372328
(p.Ser.6.Tyr)	S	6	Y	var	1	0.0560048	0.0517314	-0.27725	0.195511	-0.0320899	0.526648	0.682524	0.224122	0.375792	0.429114	0.383602	0.389199	0.381548	0.484462	0.512899	0.28253	0.465651	0.241269
(p.Lys.7.Ter)	K	7	*	var	1	-4.28154	0.0400873	-3.49283	0.470913	-0.187199	0.416779	-3.87289	0.331139	-3.69428	0.0380551	-0.545516	0.801795	-2.70708	0.774519	-2.18925	1.17618	-3.0455	0.94022
(p.Lys.7.Ala)	K	7	A	var	1	-0.165307	0.596585	0.00232921	0.153601	-0.0564784	0.0488866	0.447327	0.202507	-0.107709	0.163502	0.0128964	0.16681	0.621737	0.143485	-0.0691692	0.0930767	0.542271	0.528285
(p.Lys.7.Cys)	K	7	C	var	1	0.458143	0.771641	-0.0162929	0.177506	0.0629249	0.492218	0.8357	0.258288	0.00955461	0.218897	-0.00510522	0.0558625	0.896754	0.309133	0.00959643	0.240993	0.942098	0.872113
(p.Lys.7.Asp)	K	7	D	var	1	0.531881	0.380949	0.192574	0.0156735	0.256428	0.127493	0.260307	0.156118	0.0251725	0.0343511	0.211737	0.0888023	0.686433	0.183555	0.114045	0.0731038	0.336566	0.0898954
(p.Lys.7.Glu)	K	7	E	var	1	0.473031	0.151042	-0.0213575	0.0838706	0.010498	0.0713892	0.496317	0.180777	0.0255586	0.118948	0.0714772	0.132031	0.642455	0.147387	-0.0583967	0.0697586	0.296712	0.186692
(p.Lys.7.Phe)	K	7	F	var	1	1.67755		0.898472		0.635763		-0.760448		-1.97059		-1.34946		-0.372101		-0.587193		-1.22001
(p.Lys.7.Gly)	K	7	G	var	1	-1.49576	0.380284	0.106978	0.17709	0.00120853	0.131378	-1.21404	0.103955	0.144034	0.0322889	-0.0250679	0.00379521	-0.921815	0.171442	0.012581	0.188761	-0.803576	0.160572
(p.Lys.7.His)	K	7	H	var	1	-2.0659	0.700772	0.131619	0.223921	-0.0152286	0.329708	-2.66007	0.492585	0.171018	0.112687	-0.160775	0.260885	-2.30521	1.54492	0.155222	0.258785	-1.8381	1.75012
(p.Lys.7.Ile)	K	7	I	var	1	-0.884919	0.933276	-0.0541795	0.342608	-0.20273	0.327952	-0.037713	0.739664	0.376798	0.231326	0.00763765	0.0302831	-0.288461	0.253701	-0.335975	0.0167109	0.186098	0.761906
(p.Lys.7.Leu)	K	7	L	var	1	-2.97724	0.789003	0.070406	0.156495	0.00727117	0.0274683	-2.75313	0.0413123	-0.0704424	0.0037126	0.142002	0.0635221	-2.04705	0.319314	0.0622711	0.043346	-1.80427	1.2081
(p.Lys.7.Met)	K	7	M	var	1	0.526428	0.617335	0.0721836	0.00535533	0.127656	0.187521	0.466554	0.155244	-0.240885	0.0359852	0.0818524	0.094613	0.350118	0.0253961	-0.0436288	0.209211	0.505028	0.0898577
(p.Lys.7.Pro)	K	7	P	var	1	-5.20582	2.05276	-5.1744	0.356464	-0.108276	0.0265658	-7.80925	1.04524	-4.39091	0.337013	-0.0590764	0.258836	-2.86392	0.765369	-2.43776	0.288476	-3.2766	0.656934
(p.Lys.7.Gln)	K	7	Q	var	1	-0.394554	0.794937	0.00305668	0.204509	0.0389043	0.0236582	-0.73576	0.44897	-0.0792719	0.153697	-0.158255	0.0934687	-0.719868	0.0879365	-0.127841	0.0285297	-0.922451	0.603647
(p.Lys.7.Arg)	K	7	R	var	1	-0.578713	0.0862225	0.0598624	0.0718163	-0.00681471	0.0279083	-0.48588	0.00643027	0.0275663	0.0343739	0.0198738	0.13389	-0.31627	0.0177571	0.0119738	0.062251	-0.260762	0.175573
(p.Lys.7.Ser)	K	7	S	var	1	-0.240661	0.0508946	0.151753	0.0271154	0.160764	0.0429317	-0.0252972	0.094219	0.168231	0.0301528	-0.0784602	0.319265	0.398787	0.0124422	0.144911	0.164446	0.133052	0.439719
(p.Lys.7.Thr)	K	7	T	var	1	0.0546258	0.170301	-0.0814188	0.294297	-0.0890629	0.0803684	0.664507	0.159069	0.0803324	0.129494	-0.0426546	0.0176041	0.8383	0.108251	0.0225901	0.038884	0.855503	0.955525
(p.Lys.7.Val)	K	7	V	var	1	-0.0706671	0.110782	-0.0251639	0.0750556	-0.0164414	0.0411819	0.553352	0.193929	0.0378567	0.0535827	0.0831048	0.0217091	0.722045	0.10458	0.0269835	0.113429	0.586581	0.497822
(p.Lys.7.Trp)	K	7	W	var	1	0.431743	0.239333	0.135489	0.0432267	0.125813	0.0459842	0.553745	0.048354	-0.0877753	0.0645252	-0.0784857	0.174962	0.627995	0.0628316	-0.122441	0.300555	0.490801	0.314313
(p.Lys.7.Tyr)	K	7	Y	var	1	0.719027	1.35555	0.876218	1.73765	0.807751	1.6711	0.890362	0.362152	0.228307	0.553726	0.176622	0.0788604	0.824269	0.214927	-0.0398478	0.0361249	0.840729	0.709231
(p.Leu.8.Ter)	L	8	*	var	1	-3.28204	0.688093	-3.05433	0.41002	-0.163799	0.199715	-3.90656	0.0739349	-3.19142	0.504716	-0.459031	0.544689	-2.30691	0.532114	-1.94393	0.56359	-2.63814	0.452616
(p.Leu.8.Ala)	L	8	A	var	1	0.354541	0.149512	0.00473354	0.277512	0.0113425	0.125427	0.34638	0.040699	-0.0330989	0.0890686	0.0037144	0.116106	0.365098	0.029478	-0.0727766	0.0463671	0.169495	0.199004
(p.Leu.8.Cys)	L	8	C	var	1	0.207035	0.443722	-0.0679796	0.101308	-0.0482406	0.0314885	0.676608	0.0589999	0.0209188	0.174667	0.0181051	0.0473379	0.806864	0.0934386	0.0581713	0.147429	0.663336	0.459308
(p.Leu.8.Asp)	L	8	D	var	1	0.337534	0.144378	-0.00492233	0.317482	-0.0724273	0.0481196	0.310865	0.226985	-0.0622967	0.293952	0.0650356	0.130911	0.393899	0.25256	-0.143901	0.108499	0.261479	0.0846876
(p.Leu.8.Glu)	L	8	E	var	1	0.466368	0.113033	0.0184563	0.272882	0.0446465	0.113506	0.641328	0.0226059	-0.00689353	0.0758555	-0.0310153	0.0739888	0.675617	0.097299	-0.0641034	0.105223	0.636528	0.450198
(p.Leu.8.Phe)	L	8	F	var	1	-0.244371	0.268375	0.0901629	0.104353	0.0870208	0.000677678	-0.546986	0.140828	0.0643942	0.0311276	0.112537	0.0721804	-0.422774	0.18706	0.0777145	0.159673	-0.267833	0.330073
(p.Leu.8.Gly)	L	8	G	var	1	0.0406176	0.238676	0.0436803	0.28149	0.0110299	0.159894	-0.00098291	0.086266	0.116008	0.0262584	0.0178767	0.0124225	0.0303092	0.0544526	-0.0403927	0.0595966	0.0258246	0.143263
(p.Leu.8.His)	L	8	H	var	1	-0.243309	0.939188	0.188432	0.364085	0.0605006	0.261126	-0.132462	0.165514	-0.177695	0.0122699	-0.161649	0.0600473	0.0879293	0.140552	-0.134166	0.115451	0.572056	0.690554
(p.Leu.8.Ile)	L	8	I	var	1	0.632424	0.0477472	0.111407	0.231218	0.206063	0.234605	0.566743	0.19966	-0.0775119	0.010921	-0.0235132	0.068516	0.765123	0.0462462	-0.208934	0.0789665	0.528876	0.413943
(p.Leu.8.Lys)	L	8	K	var	1	0.105352	0.642445	-0.0151715	0.526326	-0.141021	0.224982	0.532217	0.0183843	-0.0352096	0.00847136	0.00494208	0.130397	0.626105	0.00253713	-0.193687	0.0458911	0.795053	0.793128
(p.8.=)	L	8	L	syn	1	0.00929936	0.217441	-0.0101224	0.197288	-0.0683149	0.0579925	0.323726	0.0448529	0.0982164	0.0428176	0.0699451	0.0628014	0.315422	0.00225589	0.0629455	0.0172148	0.272933	0.270561
(p.Leu.8.Met)	L	8	M	var	1	-0.135185	0.331737	0.0332432	0.0630365	-0.0883999	0.0944744	-0.539706	0.376782	-0.177081	0.206798	-0.0168228	0.057627	-0.490764	0.0917977	-0.169079	0.0703242	-0.475678	0.307385
(p.Leu.8.Asn)	L	8	N	var	1	0.247669	0.56824	-0.109128	0.461394	-0.146833	0.160483	0.673207	0.445318	-0.151228	0.36144	0.0330009	0.0448604	0.961777	0.218462	-0.0176233	0.207933	1.19772	1.06349
(p.Leu.8.Pro)	L	8	P	var	1	0.0668887	0.0918066	0.143586	0.0271962	-0.0148227	0.145499	-0.0626076	0.056218	-0.0431013	0.156634	-0.00131023	0.108089	0.328967	0.11454	0.050551	0.283049	0.44529	0.403402
(p.Leu.8.Gln)	L	8	Q	var	1	0.577855	0.138528	0.0400607	0.342476	0.0177042	0.200578	0.677562	0.541476	0.00110237	0.357129	-0.0729565	0.158023	1.10471	0.399765	0.0249859	0.163175	1.32321	1.35533
(p.Leu.8.Arg)	L	8	R	var	1	0.546275	0.145452	0.0741738	0.232656	0.0306821	0.157353	0.720626	0.215738	-0.0032054	0.0298724	0.00443427	0.0624872	0.911664	0.136279	-0.040974	0.0624757	1.08165	0.949231
(p.Leu.8.Ser)	L	8	S	var	1	0.060631	0.106662	0.0769238	0.130873	0.108837	0.0645499	0.0805824	0.172551	-0.0299335	0.0806943	0.0554828	0.0642678	0.245336	0.2169	-0.00930997	0.106909	0.368014	0.652008
(p.Leu.8.Thr)	L	8	T	var	1	0.395949	0.330326	-0.00382131	0.0134916	0.115549	0.0679133	0.44819	0.134891	0.0655815	0.0987687	0.0138403	0.013649	0.433296	0.121408	-0.106667	0.0067167	0.269921	0.411152
(p.Leu.8.Val)	L	8	V	var	1	0.348012	0.109854	0.0126027	0.101875	-0.0017687	0.135833	0.485649	0.0485557	0.0397913	0.0264965	0.0504654	0.0745177	0.495003	0.0278703	0.045948	0.0246448	0.451642	0.398773
(p.Leu.8.Trp)	L	8	W	var	1	0.484211	0.278456	0.0573724	0.186078	-0.0685957	0.0985421	0.531053	0.00723446	-0.0374345	0.0125119	-0.0148258	0.151356	0.676562	0.0461549	-0.0298032	0.043474	0.524254	0.502675
(p.Leu.8.Tyr)	L	8	Y	var	1	-0.0438706	0.616772	-0.000655912	0.126484	-0.00103465	0.0227255	0.396986	0.0428787	-0.0156382	0.172236	0.0118814	0.0331389	0.350009	0.157456	-0.0248022	0.176235	0.275751	0.0389942
(p.Leu.9.Ter)	L	9	*	var	1	-3.39054	0.12483	-3.52208	0.243594	-0.348269	0.340689	-3.94888	0.0332715	-3.62087	0.0359872	-0.611703	0.698261	-2.33801	0.45896	-2.01474	0.568896	-2.80383	0.798007
(p.Leu.9.Ala)	L	9	A	var	1	-0.111468	0.461687	-0.0501845	0.109154	0.029415	0.0416334	0.0331356	0.122289	0.00622932	0.228443	0.0394282	0.226616	0.102957	0.171765	-0.0274093	0.157323	0.0859737	0.297306
(p.Leu.9.Cys)	L	9	C	var	1	0.0341782	0.550204	0.0715806	0.204524	0.0269976	0.0723171	0.530844	0.130348	0.0817666	0.115265	0.161624	0.0146374	0.446873	0.00666207	0.0974759	0.288311	0.354707	0.115846
(p.Leu.9.Asp)	L	9	D	var	1	0.302326	0.516014	0.107473	0.174305	0.123073	0.272908	0.530943	0.301219	-0.172498	0.101819	-0.0775749	0.203077	0.778538	0.204615	-0.18188	0.0382915	0.70374	0.811574
(p.Leu.9.Glu)	L	9	E	var	1	0.290106	0.29103	0.0956023	0.162863	0.0181591	0.107133	0.191062	0.0444887	0.0121412	0.136757	0.11111	0.15009	0.270606	0.115627	0.0141144	0.103743	0.153709	0.343167
(p.Leu.9.Phe)	L	9	F	var	1	0.539429	0.10749	0.164385	0.00587642	0.14991	0.35643	0.514158	0.454259	-0.232324	0.200706	-0.178631	0.249898	0.798242	0.35593	-0.289142	0.0566165	0.792433	0.910309
(p.Leu.9.Gly)	L	9	G	var	1	0.161556	0.26208	0.0368777	0.121812	0.0108988	0.0895269	0.261174	0.0540795	-0.0144304	0.0184103	0.0233669	0.0411415	0.340935	0.0251404	0.00262721	0.0437061	0.383212	0.381366
(p.Leu.9.His)	L	9	H	var	1	0.114528	0.322999	0.192613	0.0969883	0.100241	0.0968741	0.775035	0.493616	-0.0717665	0.155036	0.0449917	0.208455	1.0854	0.389983	-0.0257668	0.0838064	1.24366	1.26478
(p.Leu.9.Ile)	L	9	I	var	1	0.446873	0.240058	-0.0378574	0.128441	0.000850847	0.195283	0.718299	0.0237524	-0.0395665	0.179807	-0.0100134	0.102758	0.87079	0.00298836	-0.121514	0.272735	0.93836	0.477491
(p.Leu.9.Lys)	L	9	K	var	1	-0.0575588	0.5116	0.201501	0.147208	-0.0173664	0.13482	0.312667	0.0974446	-0.154725	0.138604	-0.0636417	0.173929	0.17784	0.297064	-0.12691	0.0665893	0.418447	0.599738
(p.9.=)	L	9	L	syn	1	0.144261	0.335497	-0.0481923	0.0246525	0.0559393	0.0517203	0.585186	0.144756	0.00814604	0.0521064	-0.00168943	0.0388116	0.771471	0.128636	-0.00234595	0.0293689	0.689619	0.727384
(p.Leu.9.Met)	L	9	M	var	1	-0.0595836	0.380237	0.0695182	0.0275826	0.269921	0.0178871	0.206308	0.225427	-0.0299554	0.278736	0.0938894	0.00482985	0.0378036	0.287727	0.0077538	0.265742	0.0266172	0.0220501
(p.Leu.9.Asn)	L	9	N	var	1	0.366222	0.290268	-0.19632	0.267089	-0.083747	0.00352095	0.779687	0.323495	-0.0762473	0.140998	0.0105564	0.221654	1.12207	0.244359	0.0382687	0.327331	1.34836	1.13822
(p.Leu.9.Pro)	L	9	P	var	1	0.259533	0.189196	-0.00269868	0.00917424	-0.0995909	0.121032	0.636278	0.304463	-0.220359	0.323237	-0.0500517	0.292886	0.53572	0.0449254	-0.219172	0.0671349	0.882204	0.971309
(p.Leu.9.Gln)	L	9	Q	var	1	0.0904385	0.673473	0.00828838	0.0112683	-0.0608988	0.0948999	0.715287	0.217458	0.148703	0.0972517	0.0896208	0.367025	0.95125	0.38005	0.114865	0.0773065	1.04369	1.02925
(p.Leu.9.Arg)	L	9	R	var	1	-0.391493	0.427999	0.117406	0.255545	0.0393069	0.0865796	-0.302233	0.0183077	-0.0155012	0.106266	0.00578009	0.159965	-0.290694	0.049001	0.0336106	0.0426254	-0.154521	0.0202197
(p.Leu.9.Ser)	L	9	S	var	1	0.494883	0.0385657	0.00517925	0.170341	0.0346517	0.122294	0.624395	0.195979	-0.0270518	0.0409048	0.0110438	0.0183629	0.711923	0.059174	0.037853	0.0121417	0.689938	0.599106
(p.Leu.9.Thr)	L	9	T	var	1	0.467559	0.1229	0.0879275	0.223431	0.0237081	0.0529891	0.594925	0.0449411	0.0266169	0.0718912	0.0999254	0.0559603	0.791621	0.016278	0.0389072	0.0401743	0.849591	0.656558
(p.Leu.9.Val)	L	9	V	var	1	0.12578	0.309178	0.065662	0.0870224	0.020952	0.00131015	0.387916	0.114834	-0.0725895	0.138307	0.0063049	0.124197	0.490444	0.175521	-0.00978939	0.000117943	0.504302	0.568756
(p.Leu.9.Trp)	L	9	W	var	1	-2.42671	0.551161	0.0495953	0.234254	0.133506	0.0721866	-2.44538	0.205265	0.113601	0.0283289	0.0475984	0.00625485	-1.90634	0.46902	0.131552	0.00243218	-1.17616	0.654388
(p.Leu.9.Tyr)	L	9	Y	var	1	0.660993	0.0761354	0.144758	0.011192	0.047504	0.166475	0.737439	0.232347	0.0191199	0.0354761	-0.00192754	0.0796291	1.06198	0.132332	0.0291964	0.129877	1.17802	1.11254
(p.Val.10.Ter)	V	10	*	var	1	-5.56032	0.417693	-4.62033	0.120636	-0.421364	0.155378	-6.0389	0.829148	-5.16167	0.279751	-0.870552	0.805352	-2.95634	0.750223	-2.44661	1.0077	-3.3041	0.580353
(p.Val.10.Ala)	V	10	A	var	1	-0.124894	0.308007	0.0899729	0.0470468	0.0568319	0.0720237	-0.0918273	0.0484824	-0.0363199	0.0824458	0.0174969	0.0620913	-0.122461	0.0681949	-0.0383801	0.105424	-0.150407	0.0424394
(p.Val.10.Cys)	V	10	C	var	1	0.523808	0.0349452	-0.0246446	0.19248	-0.00393709	0.205791	0.830884	0.203903	0.00111392	0.0631265	0.124448	0.0387444	0.977007	0.121774	0.129728	0.0441932	0.950905	0.818397
(p.Val.10.Asp)	V	10	D	var	1	-0.451629	0.68819	-0.223172	0.0475227	-0.0750884	0.109077	-0.133309	0.310612	-0.0701254	0.03163	0.00927741	0.0662931	-0.142451	0.282706	-0.170481	0.175264	-0.0588764	0.0225004
(p.Val.10.Glu)	V	10	E	var	1	-2.97564	1.35748	-0.27942	0.410307	-0.0313335	0.187961	-2.23054	0.112074	-0.746424	0.436643	0.0498334	0.058295	-1.55031	0.268024	-1.05679	0.533104	-1.66996	0.276663
(p.Val.10.Phe)	V	10	F	var	1	-0.367143	0.840537	0.0286586	0.183587	-0.174216	0.169642	-0.611695	0.417032	0.0138719	0.0373773	0.0578671	0.159763	-0.553366	0.134444	0.050664	0.0143154	-0.282555	0.221775
(p.Val.10.Gly)	V	10	G	var	1	-2.33444	0.544332	-0.00817765	0.134378	0.02019	0.106112	-2.3237	0.289948	-0.0518506	0.00815619	0.00641097	0.0860933	-1.73137	0.231554	-0.141808	0.114769	-1.59848	0.811264
(p.Val.10.His)	V	10	H	var	1	0.50498	0.342905	0.0377384	0.219497	0.192032	0.0252436	0.735932	0.215352	0.120504	0.277579	0.282824	0.32056	0.962111	0.0330076	-0.217023	0.0145308	1.44675	1.2601
(p.Val.10.Ile)	V	10	I	var	1	0.346423	0.172604	-0.0803709	0.20212	-0.00498154	0.257922	0.5286	0.172563	-0.0813344	0.02806	-0.0339413	0.345872	0.393225	0.354177	-0.237082	0.16882	0.380588	0.693141
(p.Val.10.Lys)	V	10	K	var	1	-2.30583	0.127094	-0.0608569	0.109452	0.00353856	0.00860966	-1.73368	0.0547838	-0.449434	0.154296	0.0931984	0.160564	-1.32495	0.375577	-0.666928	0.598162	-1.58314	0.127517
(p.Val.10.Leu)	V	10	L	var	1	-1.83702	0.997977	-0.0130416	0.143229	-0.0516948	0.00648523	-1.76698	0.342198	0.0395521	0.117936	0.0658314	0.0855093	-1.31442	0.147182	0.0414773	0.0271837	-1.21658	0.810438
(p.Val.10.Met)	V	10	M	var	1	-3.57935	0.896437	0.104507	0.186549	-0.0421854	0.0968214	-2.64684	0.12337	0.0105729	0.186446	0.0703113	0.0180198	-2.10101	0.665526	0.121097	0.135142	-1.63237	1.456
(p.Val.10.Asn)	V	10	N	var	1	-0.234105	0.59715	0.339201	0.489016	0.0474941	0.208417	-0.0674188	0.16595	-0.0806232	0.354076	-0.0707801	0.328037	-0.221776	0.212592	0.0849688	0.0947468	0.215754	0.149593
(p.Val.10.Pro)	V	10	P	var	1	0.281657	0.106654	0.0691686	0.138551	0.00341035	0.122017	0.743288	0.278181	0.130541	0.106711	0.129895	0.108806	1.07208	0.168169	0.10504	0.116955	0.91098	0.803959
(p.Val.10.Gln)	V	10	Q	var	1	-2.08307	0.514882	-0.0127384	0.138605	-0.0637429	0.168831	-1.84581	0.259348	0.0638465	0.092516	0.0791174	0.166477	-1.66081	0.55226	0.0818554	0.172847	-1.15617	0.557192
(p.Val.10.Arg)	V	10	R	var	1	-0.542586	0.148901	0.0215069	0.096723	0.0923305	0.17942	-0.43377	0.036595	-0.114339	0.208021	0.119484	0.0214872	-0.167197	0.0210478	-0.252975	0.284023	-0.206583	0.196365
(p.Val.10.Ser)	V	10	S	var	1	-0.669684	0.452701	0.00196947	0.164662	0.0329893	0.157774	-0.328944	0.225638	0.0422857	0.126865	0.108385	0.041881	-0.020069	0.12476	0.0422224	0.00152602	0.178873	0.450014
(p.Val.10.Thr)	V	10	T	var	1	-0.809434	0.448657	-0.0163466	0.155143	0.0868461	0.285211	-0.529085	0.252578	-0.12252	0.0321148	0.0385261	0.122461	-0.0295063	0.0516752	7.80415e-05	0.054333	0.0267902	0.443552
(p.10.=)	V	10	V	syn	1	-0.370872	0.493718	0.078906	0.205783	0.0652722	0.173236	-0.0984932	0.000102259	0.0407955	0.00547175	-0.0109915	0.0482873	0.00357029	0.00358579	0.0163442	0.0540719	0.0930977	0.0791019
(p.Val.10.Trp)	V	10	W	var	1	-2.78672	1.03306	0.0292745	0.235416	0.051037	0.0711853	-2.58817	0.571443	0.0580826	0.0833194	0.142239	0.0454593	-1.94624	0.527183	0.14847	0.0119717	-1.15486	0.856896
(p.Val.10.Tyr)	V	10	Y	var	1	-1.64828	0.728986	0.273537	0.345609	0.156251	0.51165	-1.94448	0.469825	0.0570496	0.00414296	-0.0567768	0.264269	-1.74239	0.206413	0.0613517	0.0334465	-1.08905	1.00625
(p.Tyr.11.Ter)	Y	11	*	var	1	-3.33968	0.280678	-3.12401	0.21346	-0.328704	0.484218	-4.32033	0.259961	-3.2772	0.332907	-0.517488	0.394126	-2.53639	0.269704	-1.89477	0.442607	-2.77388	0.568319
(p.Tyr.11.Ala)	Y	11	A	var	1	0.157024	0.319653	0.0731076	0.0556334	0.127345	0.0268012	0.322017	0.112311	0.140053	0.016095	0.130786	0.0125954	0.211107	0.00535589	0.0931141	0.0394536	0.165948	0.02333
(p.Tyr.11.Cys)	Y	11	C	var	1	0.285608	0.186142	0.167945	0.212226	0.158268	0.311845	-0.0203264	0.0307146	-0.0583176	0.10845	-0.0483082	0.021301	-0.0187609	0.0395908	-0.0488286	0.0502482	-0.242671	0.145848
(p.Tyr.11.Asp)	Y	11	D	var	1	0.692076	0.406654	0.218274	0.414733	0.113605	0.215811	0.206573	0.0148822	0.180273	0.0134439	0.167665	0.144727	0.394973	0.193686	0.147701	0.162195	0.555077	0.480605
(p.Tyr.11.Glu)	Y	11	E	var	1	-0.0169995	0.515265	0.00123451	0.176961	-0.0194549	0.0581363	-0.288402	0.124934	-0.147657	0.315122	-0.147011	0.289657	-0.157569	0.239245	-0.242876	0.239024	0.0824808	0.459679
(p.Tyr.11.Phe)	Y	11	F	var	1	-0.397637	0.208184	-0.0467811	0.0103434	-0.0727465	0.0235202	-0.589505	0.345202	-0.115736	0.32094	-0.0898454	0.490115	-0.873631	0.371963	0.0316422	0.412805	-0.381878	0.184291
(p.Tyr.11.Gly)	Y	11	G	var	1	-0.463134	0.528263	0.0991843	0.122741	0.0485764	0.100481	-0.605857	0.373014	0.0871064	0.0154714	-0.00712565	0.105795	-0.663917	0.218231	0.102352	0.0253438	-0.452284	0.395786
(p.Tyr.11.His)	Y	11	H	var	1	-0.509246	0.618998	0.0184853	0.0623168	0.251825	0.312051	-0.676012	0.315571	0.135588	0.151559	-0.150231	0.0540758	-0.628302	0.365393	-0.123318	0.261487	-0.371322	0.145289
(p.Tyr.11.Ile)	Y	11	I	var	1	-0.373411	0.0509221	-0.200926	0.233865	-0.272971	0.520026	0.0699686	0.463744	0.151452	0.281728	0.245317	0.187976	-0.0691634	0.163074	0.253678	0.23733	-0.158072	0.537564
(p.Tyr.11.Lys)	Y	11	K	var	1	0.842347	0.487726	-0.161427	0.0552364	0.0884141	0.0531944	1.28361	0.44427	0.481331	0.676782	0.411724	0.11446	0.991328	0.513967	0.121913	0.698295	1.669	0.686744
(p.Tyr.11.Leu)	Y	11	L	var	1	-0.86048	0.0342456	0.0975424	0.22018	0.142978	0.203627	-0.874947	0.22571	0.219805	0.033754	0.0892016	0.100235	-0.771632	0.0573876	-0.0549618	0.0753824	-0.778558	0.259978
(p.Tyr.11.Met)	Y	11	M	var	1	0.264078	0.149772	0.042679	0.0974936	0.188701	0.173008	0.5443	0.190457	0.0998581	0.194545	0.137582	0.196744	0.366051	0.096592	-0.296788	0.0961855	0.424688	0.421677
(p.Tyr.11.Asn)	Y	11	N	var	1	-0.140154	0.49812	0.201246	0.235765	-0.040334	0.443393	-0.151307	0.634379	0.0437434	0.345633	-0.0700738	0.227951	-0.20183	0.0806956	-0.364004	0.0948515	0.0123422	0.661974
(p.Tyr.11.Pro)	Y	11	P	var	1	-4.78241	0.0437021	-2.70369	0.096025	0.0461142	0.0418386	-4.64285	0.189362	-2.09645	0.0600202	0.316632	0.0409179	-2.39108	0.678084	-1.77214	0.559979	-2.57976	0.860117
(p.Tyr.11.Gln)	Y	11	Q	var	1	-1.3893	1.04723	0.0399055	0.0488165	0.246074	0.0143714	-1.04538	0.252629	0.0881538	0.039696	-0.00366523	0.28387	-0.715022	0.0255653	0.0192894	0.3605	-0.325698	0.251542
(p.Tyr.11.Arg)	Y	11	R	var	1	-0.234178	0.119519	0.120995	0.160453	0.0674189	0.0557182	-0.420503	0.323354	0.173444	0.0611441	0.126443	0.0114778	-0.448341	0.155633	0.14894	0.0642927	-0.248219	0.350071
(p.Tyr.11.Ser)	Y	11	S	var	1	-0.435914	0.353115	0.094712	0.0178856	-0.0840512	0.202171	-0.329405	0.176805	0.160335	0.0607146	0.111938	0.0916544	-0.356293	0.0731214	0.102102	0.0778803	-0.281961	0.200317
(p.Tyr.11.Thr)	Y	11	T	var	1	0.0875097	0.207788	0.184329	0.100626	0.172324	0.283414	0.218551	0.0449179	0.126596	0.122808	0.135166	0.153137	0.256007	0.0127459	0.172018	0.188459	0.146773	0.142265
(p.Tyr.11.Val)	Y	11	V	var	1	-0.228952	0.474576	0.125483	0.1315	0.062021	0.0493168	-0.346175	0.341259	0.045531	0.0325125	-0.0149741	0.0282736	-0.433266	0.129732	0.0637292	0.0719647	-0.275154	0.323856
(p.Tyr.11.Trp)	Y	11	W	var	1	0.295556	0.369151	0.111838	0.129687	0.172504	0.19114	0.0531201	0.0431424	0.055318	0.172518	0.0256837	0.102269	-0.0933733	0.0815641	0.2021	0.12887	-0.06092	0.139847
(p.11.=)	Y	11	Y	syn	1	-1.04182	0.637189	-0.386999	0.20227	-0.310533	0.0223964	-0.376317	0.251278	-0.28701	0.0624672	-0.421359	0.239157	-0.411406	0.18586	-0.435245	0.66403	-0.533831	0.00805777
(p.Leu.12.Ter)	L	12	*	var	1	-3.30467	0.342594	-3.04472	0.352547	-0.275658	0.294715	-3.81034	0.108005	-2.88187	0.0526904	-0.293596	0.424943	-2.19587	0.378632	-1.95218	0.712929	-2.52385	0.464179
(p.Leu.12.Ala)	L	12	A	var	1	0.4231	0.190925	0.148324	0.0391326	0.134159	0.0599043	0.539074	0.20747	0.01059	0.0605128	0.0409627	0.248793	0.544104	0.192066	-0.0181646	0.00853509	0.48923	0.519442
(p.Leu.12.Cys)	L	12	C	var	1	0.252318	0.551175	0.0921562	0.133477	-0.0220523	0.0941169	0.618133	0.130496	-0.0729555	0.161183	0.102418	0.0756929	0.637859	0.139053	0.0248342	0.0343722	0.476111	0.425866
(p.Leu.12.Asp)	L	12	D	var	1	-3.65705	0.50426	-2.26184	0.203395	0.015145	0.186598	-4.14412	0.2752	-1.93329	0.472743	0.150561	0.13447	-2.00181	0.671222	-1.78898	0.252205	-2.41824	0.594935
(p.Leu.12.Glu)	L	12	E	var	1	-3.25999	1.31922	0.131152	0.251412	0.0921254	0.221752	-2.8061	0.0728545	0.143904	0.0870555	0.107367	0.0358801	-1.97212	0.436922	-0.0351748	0.0708572	-1.94389	1.06803
(p.Leu.12.Phe)	L	12	F	var	1	0.0490082	0.688635	0.176752	0.107095	-0.0356434	0.172737	0.534194	0.187201	0.0018218	0.282594	0.317726	0.116283	0.32114	0.252674	-0.117273	0.23668	0.379128	0.294462
(p.Leu.12.Gly)	L	12	G	var	1	-3.49428	0.724779	-0.123114	0.187741	0.0449424	0.0331331	-2.30108	0.156281	0.0553322	0.0455376	0.044316	0.0625196	-1.73226	0.303504	-0.179945	0.020344	-1.43395	0.559159
(p.Leu.12.His)	L	12	H	var	1	0.374229	0.266629	-0.0658155	0.370837	-0.119868	0.0332399	0.354484	0.218748	0.0622887	0.275063	0.197871	0.0309201	0.146788	0.406677	0.126365	0.344925	0.319858	0.268683
(p.Leu.12.Ile)	L	12	I	var	1	1.02086	0.419729	0.351914	0.486282	0.320804	0.0635512	0.616784	0.198051	0.224551	0.0527361	-0.550846	0.111907	0.852374	0.0651295	-0.0373212	0.0325517	0.831067	0.332691
(p.Leu.12.Lys)	L	12	K	var	1	0.0910695	0.596918	0.0920154	0.252922	0.0215212	0.0292979	0.488678	0.116517	-0.1855	0.289792	0.0209625	0.19588	0.540395	0.0232984	0.0586885	0.160453	0.612185	0.543358
(p.12.=)	L	12	L	syn	1	-0.0274719	0.338764	-0.0765328	0.232593	-0.0591041	0.0759625	0.275774	0.0375483	-0.112925	0.100793	-0.0547111	0.141947	0.371923	0.0613427	-0.0814447	0.139597	0.25608	0.305169
(p.Leu.12.Met)	L	12	M	var	1	0.509416	0.266374	-0.0438647	0.150493	-0.183196	0.067801	0.38752	0.337621	0.393505	0.115123	0.125477	0.259978	0.0919046	0.264956	-0.0594112	0.214932	-0.0850449	0.243377
(p.Leu.12.Asn)	L	12	N	var	1	-2.19259	1.03906	0.257378	0.10926	0.0406705	0.20686	-2.10376	0.32657	0.35896	0.48134	0.319509	0.18238	-1.36249	1.066	0.215567	0.448778	-0.942439	1.03089
(p.Leu.12.Pro)	L	12	P	var	1	-1.40625	0.713476	0.0732555	0.247544	0.0180568	0.0226091	-0.86235	0.463669	0.0136765	0.0511149	-0.0711853	0.03431	-0.838815	0.341163	-0.0517182	0.128094	-0.630734	0.51603
(p.Leu.12.Gln)	L	12	Q	var	1	-0.577241	0.58796	0.0774723	0.146685	0.0953941	0.130422	-0.141916	0.0781206	-0.0253701	0.123377	-0.36499	0.0219621	-0.182821	0.0153568	-0.0914629	0.225739	0.00336808	0.21448
(p.Leu.12.Arg)	L	12	R	var	1	0.213453	0.0687484	0.0240241	0.198049	-0.0158938	0.0950098	0.0485253	0.210654	0.145899	0.100203	0.0648491	0.161599	0.0865382	0.119817	0.0655634	0.0648322	0.318639	0.199602
(p.Leu.12.Ser)	L	12	S	var	1	0.129289	0.149792	0.00403175	0.044312	-0.0466495	0.0175461	0.534431	0.313721	0.0181492	0.0823607	0.0402944	0.0257657	0.827465	0.240598	-0.0436096	0.0115194	0.786199	0.961879
(p.Leu.12.Thr)	L	12	T	var	1	0.324669	0.241383	-0.00255931	0.127717	-0.0196388	0.0335036	0.747825	0.164821	0.208965	0.102195	0.0691135	0.13976	1.02375	0.25311	0.175698	0.127014	0.934125	0.895737
(p.Leu.12.Val)	L	12	V	var	1	0.387493	0.128582	0.0760747	0.100465	0.0141911	0.0999638	0.617031	0.237001	0.0430561	0.144292	0.090179	0.0826788	0.657125	0.145076	0.0508922	0.00715893	0.694204	0.537303
(p.Leu.12.Trp)	L	12	W	var	1	-0.326411	0.418841	-0.00548628	0.037075	-0.0655179	0.0509231	-0.212059	0.138863	0.0337608	0.107044	-0.0489521	0.0610803	-0.164065	0.106657	0.0125109	0.0425855	-0.206622	0.103435
(p.Leu.12.Tyr)	L	12	Y	var	1	0.780714	0.153212	0.255612	0.293415	0.151722	0.156387	0.462121	0.0868526	-0.406036	0.111905	-0.331985	0.0120487	0.334137	0.169327	-0.332616	0.00576759	0.327473	0.068401
(p.Thr.13.Ter)	T	13	*	var	1	-6.23916	1.34208	-3.77756	0.0867993	-0.126714	0.234338	-6.947	0.0773482	-4.16596	0.182616	-0.316102	0.228344	-2.71184	0.796619	-2.28725	0.511107	-3.21264	0.741778
(p.Thr.13.Ala)	T	13	A	var	1	-1.7889	0.36627	0.112494	0.0109905	0.113328	0.0120039	-1.78514	0.171728	0.0873377	0.0568442	0.128467	0.0124527	-1.46393	0.315605	0.0735598	0.085867	-1.05374	0.75819
(p.Thr.13.Cys)	T	13	C	var	1	-0.519803	0.805842	0.0690858	0.001467	0.0670023	0.0635998	-0.203232	0.0709035	-0.0415483	0.0538702	-0.0208474	0.199436	-0.259595	0.0957678	0.0978522	0.0358755	-0.274038	0.196036
(p.Thr.13.Asp)	T	13	D	var	1	-1.50708	0.693187	0.125036	0.135727	0.0830498	0.0623181	-0.656577	0.38398	0.147656	0.0850041	0.0467699	0.134019	-0.526213	0.211664	0.0530711	0.0616327	-0.0587395	0.171299
(p.Thr.13.Glu)	T	13	E	var	1	-4.79366	1.55014	0.0853229	0.226263	0.00329519	0.217075	-3.41323	0.282901	0.0584258	0.0224835	0.131323	0.0771555	-2.34476	0.588626	0.162457	0.0192058	-1.89018	1.25094
(p.Thr.13.Phe)	T	13	F	var	1	-2.28524	0.975485	0.22571	0.213474	0.235277	0.124821	-2.38385	0.00270069	0.146588	0.319935	-0.297323	0.927274	-1.75807	0.496378	0.0571957	0.270871	-1.35784	0.292489
(p.Thr.13.Gly)	T	13	G	var	1	-6.04363	0.450491	-1.24015	0.55967	0.0588068	0.00011321	-5.19042	0.0275238	-0.718865	0.100565	0.073787	0.186623	-2.60044	0.518155	-1.23504	0.244162	-2.91593	1.21684
(p.Thr.13.His)	T	13	H	var	1	0.4908	0.116588	-0.0265201	0.0339057	-0.0659592	0.0522555	0.662716	0.235642	-0.139158	0.00976283	-0.0682079	0.288726	0.606734	0.0574333	-0.0437312	0.169439	0.637864	0.490924
(p.Thr.13.Ile)	T	13	I	var	1	-0.811846	0.345464	0.0700826	0.0106529	0.0464453	0.0611984	-1.02145	0.249275	0.113437	0.0223974	-0.0992546	0.320135	-1.06369	0.173098	0.113138	0.142052	-0.810477	0.523773
(p.Thr.13.Lys)	T	13	K	var	1	-2.25463	0.364372	0.183994	0.102528	0.0159011	0.115508	-2.00621	0.135663	0.202955	0.276743	0.124671	0.102037	-1.35	0.16016	0.115425	0.361419	-0.121839	0.188001
(p.Thr.13.Leu)	T	13	L	var	1	-0.824331	0.927515	0.0793695	0.0492585	0.119393	0.114398	-0.361253	0.0816691	0.190218	0.0370872	0.0603016	0.121274	-0.36439	0.0814684	0.0602523	0.0287635	-0.280239	0.140557
(p.Thr.13.Met)	T	13	M	var	1	-2.96852	0.402579	-0.0982967	0.00714449	0.207196	0.123225	-2.04344	0.920327	0.242734	0.269423	0.267548	0.149893	-1.29855	0.650296	0.0921478	0.247032	-0.911718	0.955602
(p.Thr.13.Asn)	T	13	N	var	1	-2.35958	0.280141	0.0361084	0.0877738	0.129383	0.0452201	-2.12966	0.230231	-0.266432	0.0682054	-0.0531201	0.622785	-1.73495	0.88209	-0.252786	0.304633	-0.786281	0.866848
(p.Thr.13.Pro)	T	13	P	var	1	0.277902	0.0455385	0.0317337	0.0313461	-0.00181308	0.128817	0.637812	0.0543372	0.147871	0.0953229	0.0191556	0.0176408	0.45326	0.0159976	0.113884	0.0391439	0.448916	0.110995
(p.Thr.13.Gln)	T	13	Q	var	1	-1.23667	1.22633	-0.0322068	0.298782	-0.0872321	0.169374	-1.06642	0.409947	0.0482666	0.090695	-0.0770658	0.164897	-1.08717	0.212689	-0.0791102	0.0284162	-0.961859	0.286094
(p.Thr.13.Arg)	T	13	R	var	1	-2.83283	0.056313	-0.0600625	0.03488	0.0246603	0.00983263	-2.73051	0.207303	-0.000560259	0.0430008	-0.0464355	0.174134	-1.89612	0.198146	-0.096536	0.00494582	-0.792867	0.502054
(p.Thr.13.Ser)	T	13	S	var	1	-0.743379	0.249801	0.158103	0.0763307	0.0999547	0.0896959	-0.489213	0.0880493	0.125966	0.0124136	0.0717011	0.0633048	-0.615794	0.0655843	0.0868829	0.0256514	-0.401112	0.275031
(p.13.=)	T	13	T	syn	1	-1.15777	0.122161	-0.0241225	0.0119619	0.0413878	0.0292852	-1.20728	0.0888695	0.0191088	0.130758	-0.0377319	0.0189531	-1.19708	0.190046	-0.0467897	0.0402191	-0.817688	0.629364
(p.Thr.13.Val)	T	13	V	var	1	-2.86159	0.56825	0.10277	0.0469364	0.0541534	0.0150878	-2.05559	0.173406	0.132306	0.0511006	0.0935691	0.152448	-1.57866	0.249241	0.0849893	0.0186857	-1.19059	0.796155
(p.Thr.13.Trp)	T	13	W	var	1	-4.96143	0.990482	-0.959671	0.420135	0.0706191	0.0658771	-5.72052	0.119409	-1.40694	0.366821	0.0672989	0.179406	-2.5553	0.788111	-1.61001	0.430474	-2.97452	1.00655
(p.Thr.13.Tyr)	T	13	Y	var	1	-0.153737	0.321889	-0.019786	0.152341	-0.0980726	0.21436	0.42725	0.288243	0.128848	0.239324	0.121467	0.157488	0.355222	0.239466	0.300874	0.23557	0.360395	0.0173078
(p.Ala.14.Ter)	A	14	*	var	1	-3.44734	0.784934	-3.11963	0.00603027	-0.228583	0.475567	-4.8128	0.985121	-3.27769	0.211835	-0.702969	0.948282	-2.79368	0.76805	-1.74427	0.390833	-3.14992	1.11621
(p.14.=)	A	14	A	syn	1	0.104593	0.0259717	0.000154517	0.104286	-0.01138	0.281079	0.131182	0.00141345	0.0064792	0.206839	-0.0611932	0.0285615	0.150293	0.110439	-0.0170257	0.153566	0.0917057	0.0574654
(p.Ala.14.Cys)	A	14	C	var	1	0.499063	0.0910367	0.143077	0.154079	0.0754846	0.0632675	0.530535	0.152121	0.0355456	0.270754	-0.0336667	0.273115	0.549023	0.281977	-0.025663	0.0124243	0.534842	0.535698
(p.Ala.14.Asp)	A	14	D	var	1	-2.0297	1.16918	0.0640697	0.149052	0.0929377	0.165017	-0.942345	0.26654	0.220314	0.010564	-0.0193683	0.310649	-0.904897	0.441916	0.0257232	0.139705	-0.248666	0.0304707
(p.Ala.14.Glu)	A	14	E	var	1	-4.16196	0.761443	-0.132801	0.276268	0.127222	0.00833723	-3.67689	0.143094	-0.0294602	0.110937	0.19522	0.122788	-2.54678	1.02716	-0.269217	0.217072	-2.52747	1.28557
(p.Ala.14.Phe)	A	14	F	var	1	-0.266886	0.633405	-0.261866	0.105271	-0.041766	0.0313626	0.774008	0.448935	-0.0338021	0.221847	-0.175901	0.085972	0.747963	0.24584	0.145603	0.159903	0.774783	1.00748
(p.Ala.14.Gly)	A	14	G	var	1	-1.1232	0.264719	0.0816017	0.0969656	0.0207264	0.0335755	-1.09689	0.0688236	0.00263533	0.13821	0.0045261	0.0484968	-0.989291	0.204985	-0.0416807	0.109177	-0.819158	0.259612
(p.Ala.14.His)	A	14	H	var	1	0.276766	0.475436	0.588231	0.00299649	-0.195106	0.719751	-0.515067	0.12009	-0.346455	0.137023	-0.146533	0.644265	0.184562	0.000381937	-0.15634	0.30411	0.732171	0.662064
(p.Ala.14.Ile)	A	14	I	var	1	0.417061	0.792025	-0.359573	0.170366	-0.209321	0.314869	0.470643	0.019136	0.345166	0.0135718	-0.0471844	0.097552	0.467711	0.135845	0.394097	0.299912	0.733009	0.121142
(p.Ala.14.Lys)	A	14	K	var	1	-1.97713	2.71206	0.31607	0.654338	0.0621804	0.0834512	-3.04553	2.42526	0.304783	0.934321	-0.0850991	0.823832	-1.60161	1.08965	0.0704819	1.20253	0.227622	2.07939
(p.Ala.14.Leu)	A	14	L	var	1	-0.13622	0.376125	-0.0326148	0.00618155	0.0172441	0.333562	0.251156	0.198467	0.0268777	0.0865027	-0.00279081	0.0956496	0.193062	0.0566714	-0.0184501	0.2286	0.0550442	0.0404139
(p.Ala.14.Met)	A	14	M	var	1	-1.65842	0.435426	-0.0249849	0.0895016	-0.275958	0.20129	-0.453157	0.00551344	0.202909	0.0195782	0.327146	0.0810151	-0.287855	0.30062	0.374343	0.196896	-0.272728	0.526921
(p.Ala.14.Asn)	A	14	N	var	1	-0.596632	0.848938	-0.0758036	0.141147	0.219142	0.0631475	-0.11562	0.0104626	0.174005	0.143744	-0.306284	0.298292	0.346397	0.0531406	-0.089092	0.315925	0.393617	0.181304
(p.Ala.14.Pro)	A	14	P	var	1	0.366702	0.237429	0.0697252	0.275492	-0.221393	0.00523874	0.479517	0.0988399	-0.163957	0.315528	-0.0831146	0.239687	0.510871	0.056371	-0.0376866	0.0485536	0.45152	0.917673
(p.Ala.14.Gln)	A	14	Q	var	1	-2.14629	1.07639	0.139969	0.072359	0.0356615	0.311485	-1.12963	1.19619	0.357624	0.225601	0.194997	0.275327	-0.779201	0.870121	0.317575	0.356219	-0.321225	0.705819
(p.Ala.14.Arg)	A	14	R	var	1	-1.44643	0.19311	-0.0478684	0.117952	-0.118342	0.0340709	-1.14225	0.253261	0.0113981	0.223938	0.0458261	0.390907	-0.678164	0.00919536	-0.189656	0.0645746	0.172454	0.496495
(p.Ala.14.Ser)	A	14	S	var	1	-0.12284	0.711907	0.103685	0.106076	0.0824454	0.243522	0.383123	0.213477	0.0550728	0.163126	0.161311	0.1263	0.416324	0.0148389	0.104083	0.0928745	0.231549	0.125851
(p.Ala.14.Thr)	A	14	T	var	1	-0.136829	0.069072	-0.303633	0.0512714	-0.133199	0.0161503	-0.298503	0.0360205	-0.192594	0.0536982	-0.141246	0.0419688	-0.0758749	0.0870255	-0.395765	0.175252	-0.13811	0.183356
(p.Ala.14.Val)	A	14	V	var	1	-1.27816	0.477855	0.186912	0.0399339	-0.0586384	0.0449387	-1.56703	0.231708	-0.0455139	0.0827707	-0.0189735	0.0758816	-1.29997	0.216596	0.0518567	0.089004	-0.929582	0.596657
(p.Ala.14.Trp)	A	14	W	var	1	-2.77803	0.630166	-0.0305552	0.0628352	-0.168473	0.171846	-2.56188	0.123791	0.241468	0.017162	0.128773	0.242913	-2.25651	0.289707	0.31948	0.00899439	-1.48626	1.39341
(p.Ala.14.Tyr)	A	14	Y	var	1	-0.103694	1.1081	0.301344	0.160524	0.281704	0.0880947	0.0778346	0.0919821	0.233561	0.48107	0.245832	0.2229	0.109245	0.4284	0.111442	0.198596	-0.0576683	0.220163
(p.Ser.15.Ter)	S	15	*	var	1	-4.15377	0.65954	-4.26077	0.227856	-0.273455	0.39261	-5.07653	0.0557129	-4.2131	0.555893	-0.467704	0.510306	-2.45126	0.82367	-2.25427	0.795526	-2.82081	0.512461
(p.Ser.15.Ala)	S	15	A	var	1	0.407155	0.199831	-0.179927	0.0173634	0.0185393	0.111777	0.523651	0.0138296	-0.187218	0.295785	-0.05377	0.258973	0.74359	0.0274461	-0.065972	0.270339	0.671757	0.423709
(p.Ser.15.Cys)	S	15	C	var	1	0.643087	0.525374	0.0234377	0.0199825	-0.0296929	0.0346152	0.714851	0.0548744	-0.1564	0.00362368	-0.0757778	0.297899	1.02157	0.0462106	0.0674283	0.334827	0.956576	0.335969
(p.Ser.15.Asp)	S	15	D	var	1	-1.36626	0.350365	-0.0498031	0.315465	-0.0237951	0.0437956	-1.21933	0.216269	0.159044	0.056977	-0.000396786	0.051746	-1.15526	0.26018	0.126808	0.276776	-1.072	0.416984
(p.Ser.15.Glu)	S	15	E	var	1	-2.69361	1.6591	0.0737054	0.00302826	0.100096	0.0122388	-1.75968	0.415965	0.0964937	0.0574728	-0.0242097	0.226523	-1.39295	0.158451	0.00301709	0.107784	-1.32845	0.722429
(p.Ser.15.Gly)	S	15	G	var	1	0.595084	0.0520323	0.164623	0.0572184	0.147887	0.0495429	0.554125	0.145218	-0.0685932	0.121936	-0.030755	0.0720091	0.656567	0.103571	0.0222679	0.0812574	0.506423	0.556599
(p.Ser.15.His)	S	15	H	var	1	0.613743	0.677183	0.436008	0.705678	0.525649	0.229925	0.725679	0.297682	-0.415503	0.417506	-0.679854	1.57003	0.611233	0.599494	-0.420089	0.859386	1.08953	0.757013
(p.Ser.15.Ile)	S	15	I	var	1	-1.43123	1.26038	-0.387261	0.555288	-0.223398	0.256654	0.0255708	0.167718	0.479101	0.0415226	0.36226	0.251866	0.314582	0.414392	0.510027	0.278255	-0.0216978	0.0580053
(p.Ser.15.Lys)	S	15	K	var	1	-2.52031	0.0206999	0.0637858	0.341703	-0.0671342	0.413938	-2.01347	0.693257	-0.0647772	0.223892	0.238477	0.115843	-1.29443	0.55191	-0.153248	0.241705	-1.69733	0.834094
(p.Ser.15.Leu)	S	15	L	var	1	-0.517232	0.288174	0.0716893	0.0281511	0.0320843	0.151538	-0.156236	0.0116398	0.051752	0.029148	0.0102664	0.109049	-0.111219	0.122627	-0.0571562	0.0201996	0.0766721	0.0687828
(p.Ser.15.Met)	S	15	M	var	1	-3.58464	2.58063	0.318479	0.0933367	-0.025005	0.315882	-4.30731	1.38126	-0.231308	0.0362553	-0.183932	0.0414269	-2.30565	0.671099	-0.835289	0.0724972	-2.95179	0.805241
(p.Ser.15.Asn)	S	15	N	var	1	-3.12772	2.63986	0.101497	0.347046	0.0286565	0.35849	-2.80059	1.14247	-0.257422	0.447709	-0.14588	0.189914	-2.35298	0.539794	-0.557703	0.0991815	-2.70236	1.24482
(p.Ser.15.Pro)	S	15	P	var	1	-0.158277	0.584483	-0.149277	0.480571	-0.0538211	0.329884	0.0708901	0.269205	0.021696	0.100122	0.0301581	0.0110997	0.188708	0.173548	0.037104	0.0148593	0.186876	0.330669
(p.Ser.15.Gln)	S	15	Q	var	1	0.475828	0.462802	0.17787	0.163087	0.108735	0.0955949	0.948459	0.430014	0.131181	0.359691	-0.091763	0.498033	0.655938	0.254227	-0.304962	0.387674	1.39571	0.691511
(p.Ser.15.Arg)	S	15	R	var	1	-0.839325	0.709824	0.18511	0.143064	0.088791	0.00841793	-0.635442	0.176786	0.261846	0.143109	0.239001	0.130772	-0.0314237	0.166681	0.238113	0.0320889	0.666235	0.62584
(p.15.=)	S	15	S	syn	1	0.254396	0.283915	-0.0914548	0.021507	-0.0790965	0.0325005	0.0373281	0.185856	0.0161932	0.279739	-0.0176791	0.039049	-0.011486	0.0562761	-0.0611215	0.143364	0.0578676	0.200557
(p.Ser.15.Thr)	S	15	T	var	1	0.661352	0.306169	0.0682229	0.00802277	0.0717982	0.095873	0.537203	0.0202127	0.00164836	0.0550271	0.0705379	0.0689424	0.4972	0.0764774	0.0419361	0.0280452	0.398495	0.274095
(p.Ser.15.Val)	S	15	V	var	1	0.485684	0.0206299	0.226649	0.00368018	0.221499	0.0238914	0.214407	0.159961	-0.0696172	0.13059	-0.0783241	0.118379	0.363099	0.0690068	0.0319952	0.0444245	0.299694	0.306271
(p.Ser.15.Trp)	S	15	W	var	1	0.746496	0.297274	0.171704	0.0372333	-0.046602	0.348122	0.61041	0.299894	-0.0707268	0.197279	-0.110793	0.183247	0.710847	0.088957	-0.0805162	0.0213889	0.668656	0.521279
(p.Ser.15.Tyr)	S	15	Y	var	1	0.134742	0.756884	-0.126318	0.267099	-0.00669188	0.269317	0.688164	0.30609	0.214896	0.234178	0.203682	0.00600977	0.729224	0.36547	0.137497	0.182547	0.450205	0.00756426
(p.Ile.16.Ter)	I	16	*	var	1	-4.90568	0.125444	-3.98001	0.107248	-0.0998214	0.199349	-5.17196	0.302359	-4.42781	0.120401	-0.255266	0.561563	-2.43264	0.437487	-1.95171	0.44143	-3.02231	0.732083
(p.Ile.16.Ala)	I	16	A	var	1	-0.102163	0.172786	-0.338582	0.156478	-0.104875	0.189127	0.245754	0.452708	-0.356139	0.0999795	-0.0823601	0.143436	0.463308	0.365575	-0.171319	0.204308	0.404645	0.96658
(p.Ile.16.Cys)	I	16	C	var	1	0.297752	0.167306	-0.102147	0.00500877	-0.0344483	0.0875622	0.173648	0.470111	-0.361396	0.352855	-0.218366	0.405248	0.0930285	0.665727	-0.305442	0.212745	-0.0338555	0.725032
(p.Ile.16.Asp)	I	16	D	var	1	-3.69236	1.19691	-0.572642	0.195413	-0.216251	0.31031	-3.96038	0.0462867	-0.567866	0.043867	-0.239372	0.119831	-2.27779	0.462405	-0.545128	0.0945172	-2.28906	1.23153
(p.Ile.16.Glu)	I	16	E	var	1	-0.697292	0.273407	-0.373618	0.00492501	-0.00934787	0.0898346	-1.19339	0.484453	-0.406492	0.0596421	-0.166974	0.0407604	-1.01762	0.43979	-0.28011	0.0990568	-0.329534	0.279995
(p.Ile.16.Phe)	I	16	F	var	1	-0.688248	0.202802	-0.568818	0.21117	-0.212701	0.0862793	-0.405445	0.0125584	-0.589908	0.309238	-0.0235713	0.163159	-0.292387	0.0324862	-0.313469	0.321284	-0.294683	0.142887
(p.Ile.16.Gly)	I	16	G	var	1	0.332556	0.206272	-0.249578	0.0879219	-0.054801	0.0953937	0.263389	0.175755	-0.364227	0.0487328	-0.113595	0.00551118	0.513552	0.19485	-0.251537	0.0516315	0.498241	0.638864
(p.Ile.16.His)	I	16	H	var	1	-3.9146	2.64929	-0.492499	0.14283	-0.35039	0.492149	-2.60062	0.635452	0.211126	0.137098	0.23186	0.0205484	-1.62116	0.721161	0.341329	0.325414	-1.57114	0.185297
(p.16.=)	I	16	I	syn	1	-0.67609		0.201947		-0.18736		0.86856	0.0905301	0.234172	0.0797212	0.24537	0.459806	0.990762	0.209444	0.139234	0.146366	0.905645	0.805005
(p.Ile.16.Lys)	I	16	K	var	1	0.633818	0.166495	-0.0987472	0.0625898	0.0962603	0.0232886	0.295682	0.0259206	-0.115927	0.155268	-0.151399	0.298237	0.664761	0.0521311	-0.533078	0.190486	1.22441	1.39399
(p.Ile.16.Leu)	I	16	L	var	1	-0.837525	0.383235	-0.287821	0.158256	-0.0525976	0.0319907	-0.399327	0.314828	-0.181181	0.260488	-0.0938891	0.0691199	-0.108143	0.229173	-0.197184	0.0283745	0.000871128	0.226812
(p.Ile.16.Met)	I	16	M	var	1	-0.34178	0.287177	-0.190524	0.27706	-0.00619865	0.175522	0.617715	0.0268475	-0.249181	0.0926023	0.242652	0.255934	0.609634	0.178057	-0.0964834	0.0210644	0.50745	0.369199
(p.Ile.16.Asn)	I	16	N	var	1	-0.581008	0.365652	-1.13999	0.47804	-0.0648424	0.0767096	-1.17939	0.118165	-1.54544	0.215976	-0.345452	0.533479	-0.848722	0.0365998	-1.05846	0.165693	-0.454117	0.719251
(p.Ile.16.Pro)	I	16	P	var	1	-4.33367	2.01702	-1.16396	0.334407	0.112263	0.0869211	-5.26201	0.0228197	-0.965154	0.0239434	-0.208318	0.0407045	-2.61057	0.349257	-1.0503	0.00119503	-3.14982	1.27317
(p.Ile.16.Gln)	I	16	Q	var	1	-3.00716	0.579559	-0.518818	0.0788275	0.0772344	0.280184	-2.55531	0.188068	-0.559239	0.219195	-0.343563	0.129581	-1.88025	0.0786785	-0.448393	0.279037	-1.70552	0.948386
(p.Ile.16.Arg)	I	16	R	var	1	-0.845679	0.121368	-0.433439	0.204255	-0.0789312	0.0692617	-0.836307	0.165576	-0.42051	0.0166598	-0.102515	0.0196872	-0.664445	0.006912	-0.42787	0.0770209	-0.00859367	0.493883
(p.Ile.16.Ser)	I	16	S	var	1	-0.346451	0.227849	-0.7211	0.0564429	-0.158666	0.0397577	-0.000492434	0.348249	-0.65377	0.275482	-0.22675	0.0418651	0.280236	0.0707318	-0.455159	0.0580731	0.320804	0.976498
(p.Ile.16.Thr)	I	16	T	var	1	-0.542954	0.505959	-0.44651	0.0838018	0.133276	0.243892	0.0345526	0.125664	-0.484407	0.0265937	-0.0944981	0.49852	0.0917238	0.0299198	-0.370212	0.218616	0.0156159	0.704486
(p.Ile.16.Val)	I	16	V	var	1	-0.143853	0.0488547	-0.648887	0.155366	-0.0735474	0.128644	-0.11863	0.0950188	-0.567661	0.0384257	-0.119185	0.287089	0.0906308	0.0180616	-0.455649	0.158189	-0.0383535	0.326639
(p.Ile.16.Trp)	I	16	W	var	1	-0.5081	0.579775	-0.590413	0.0435269	-0.11309	0.0920825	0.215369	0.407894	-0.499966	0.0311587	-0.104295	0.00167817	0.275183	0.147231	-0.453044	0.108324	0.129673	0.533939
(p.Ile.16.Tyr)	I	16	Y	var	1	-0.521536	0.985821	-0.0665409	0.182562	-0.0369159	0.299037	0.0679634	0.299446	0.00875108	0.111551	0.0176282	0.0373573	0.209007	0.0403998	-0.201622	0.258157	0.118341	0.254686
(p.Met.17.Ter)	M	17	*	var	1	-2.49354	0.351089	-2.24342	0.0373544	-0.0338192	0.0628337	-3.50521	0.348781	-2.61035	0.121308	-0.410121	0.23195	-2.13004	0.330152	-1.93371	0.511849	-2.37111	0.910592
(p.Met.17.Ala)	M	17	A	var	1	-0.10756	0.424516	-0.239778	0.0624155	-0.122627	0.177906	0.392526	0.429512	-0.427844	0.357065	-0.158665	0.044685	0.599761	0.388167	-0.204064	0.0305599	0.469224	0.862063
(p.Met.17.Cys)	M	17	C	var	1	0.381828	0.0370655	-0.259116	0.243653	-0.0831863	0.0471848	0.252113	0.219877	-0.459145	0.144612	-0.304318	0.328298	0.433312	0.151496	-0.306538	0.0490659	0.511205	0.802728
(p.Met.17.Asp)	M	17	D	var	1	0.217455	0.402862	-0.186976	0.268736	-0.178991	0.0857028	0.00663599	0.133375	-0.260731	0.0241349	-0.220112	0.100194	0.103336	0.0815284	0.0258636	0.0546158	0.274237	0.649963
(p.Met.17.Glu)	M	17	E	var	1	0.32143	0.0449841	-0.209085	0.00292465	-0.0754925	0.112085	0.329266	0.28082	-0.442389	0.121351	-0.145893	0.019694	0.47374	0.177853	-0.326094	0.155378	0.57435	0.934728
(p.Met.17.Phe)	M	17	F	var	1	0.230085	0.1606	-0.441747	0.552025	0.269397	0.0879809	0.233932	0.387648	-0.405032	0.519478	-0.185423	0.535575	0.364439	0.30182	-0.625407	0.214496	0.589621	1.24188
(p.Met.17.Gly)	M	17	G	var	1	0.39435	0.208577	-0.225445	0.0240772	0.0274022	0.0198541	0.337945	0.223922	-0.26734	0.115132	-0.0322845	0.0707186	0.443503	0.145845	-0.166176	0.0100176	0.246759	0.499994
(p.Met.17.His)	M	17	H	var	1	0.0730692	0.0283027	-0.0554641	0.465906	0.486901	0.369586	0.333407	1.04372	-0.0545628	1.17724	-0.59224	1.40183	0.833133	0.839835	-0.294164	0.352112	0.930416	1.70115
(p.Met.17.Ile)	M	17	I	var	1	0.48955	0.0883409	-0.119976	0.0777444	-0.0636344	0.0944778	0.696167	0.491158	-0.177856	0.00360175	-0.176048	0.200944	0.646633	0.228873	-0.242288	0.377671	0.741988	0.580026
(p.Met.17.Lys)	M	17	K	var	1	-0.139679	0.0542827	-0.522415	4.09487e-06	-0.135403	0.168588	0.0604408	0.54296	-0.641777	0.141877	-0.112836	0.258277	0.147655	0.0634243	-0.709304	0.038435	0.616544	1.41146
(p.Met.17.Leu)	M	17	L	var	1	0.116613	0.275497	-0.577487	0.14067	-0.111604	0.0970872	0.134353	0.411123	-0.525413	0.134062	-0.151041	0.0244512	0.364544	0.179513	-0.469271	0.037431	0.138853	0.595546
(p.Met.17.Asn)	M	17	N	var	1	0.903788	0.324474	-0.567438	0.436443	-0.384575	0.0707834	1.12633	0.422978	0.660276	0.936088	-0.424374	0.205488	1.07423	0.510561	0.0984268	0.329181	1.54584	1.17111
(p.Met.17.Pro)	M	17	P	var	1	-1.25479	0.148147	-0.223393	0.129676	0.0259331	0.136192	-2.30282	0.410858	-0.438047	0.278329	-0.263222	0.285837	-1.94544	0.203754	-0.266684	0.0589518	-1.41368	0.861921
(p.Met.17.Gln)	M	17	Q	var	1	1.1203	0.201109	0.0577759	0.720183	-0.0269882	0.476942	0.596288	0.0633284	-0.161767	0.00207807	-0.534747	0.58051	0.650439	0.326187	-0.415005	0.369107	0.825008	0.739343
(p.Met.17.Arg)	M	17	R	var	1	-2.24886	0.372525	-0.290586	0.0567679	-0.00240381	0.0243027	-1.29518	0.00981227	-0.362195	0.130502	-0.113468	0.0192338	-0.853151	0.0258191	-0.358035	0.0820334	-0.105016	0.242105
(p.Met.17.Ser)	M	17	S	var	1	0.326485	0.0837432	-0.110187	0.270213	-0.0709287	0.188624	0.531942	0.243947	-0.111389	0.0503676	-0.0317496	0.128054	0.792446	0.257966	-0.188749	0.106171	0.656518	0.629251
(p.Met.17.Thr)	M	17	T	var	1	0.0692661	0.0951542	-0.262755	0.0998775	-0.0643261	0.0534862	0.0903153	0.256732	-0.298046	0.0285982	-0.193952	0.13325	0.0964282	0.247641	-0.237545	0.0793214	0.0412472	0.565869
(p.Met.17.Val)	M	17	V	var	1	0.460364	0.0829746	-0.0631276	0.087358	-0.00781304	0.0353456	0.593706	0.247256	-0.0584647	0.0481208	0.035348	0.0188146	0.721596	0.164975	-0.0405821	0.064513	0.613063	0.586928
(p.Met.17.Trp)	M	17	W	var	1	-0.465204	0.107974	-0.0645374	0.0730972	0.0116237	0.0066549	-1.45542	0.538626	-0.115711	0.0233966	-0.0101758	0.00481102	-1.15643	0.471279	0.000913584	0.111972	-0.75339	0.557073
(p.Met.17.Tyr)	M	17	Y	var	1	0.399228	0.50786	0.0550434	0.0650265	-0.0811302	0.0858638	0.86832	0.271398	0.244894	0.150532	0.172973	0.0173082	1.17952	0.224685	0.0334816	0.0811715	1.20335	0.786303
(p.Ala.18.Ter)	A	18	*	var	1	-3.38504	0.164357	-3.45659	0.219128	-0.177536	0.130796	-3.38328	0.225679	-2.92658	0.350556	-0.274572	0.0980157	-2.32132	0.472474	-1.92906	0.569328	-2.70008	0.397197
(p.18.=)	A	18	A	syn	1	0.759174	0.178549	0.0650892	0.0813397	0.031964	0.06642	0.672726	0.170988	-0.0132427	0.0755758	0.00418815	0.0552776	0.753838	0.0855493	0.00299873	0.0578525	0.62378	0.51333
(p.Ala.18.Cys)	A	18	C	var	1	0.147672	0.108587	-0.0373868	0.16465	0.0289055	0.127277	0.493931	0.306027	-0.221839	0.387052	-0.000541586	0.00296082	0.723954	0.215815	-0.0425787	0.150386	0.519537	0.677097
(p.Ala.18.Asp)	A	18	D	var	1	0.773115	0.250828	0.265867	0.237272	0.260247	0.42895	0.711474	0.0399977	0.409262	0.0957607	0.296109	0.291845	0.857268	0.141896	0.233463	0.0596547	1.07268	0.750695
(p.Ala.18.Glu)	A	18	E	var	1	0.643928	0.164164	-0.133647	0.262942	-0.0218798	0.0209063	0.797834	0.227745	0.166564	0.0498238	-0.0767689	0.0808721	0.814842	0.165946	-0.0199287	0.138406	1.13558	1.14206
(p.Ala.18.Phe)	A	18	F	var	1	0.714533	0.00517095	0.311576	0.189932	0.0928807	0.059511	0.931954	0.0927994	0.063912	0.262094	-0.0918237	0.23831	1.17313	0.191608	0.291186	0.173754	1.03898	0.0219781
(p.Ala.18.Gly)	A	18	G	var	1	0.123591	0.0462719	0.0676691	0.112394	0.0283521	0.0674123	0.00367003	0.0152566	0.0676279	0.0328983	0.0514361	0.0876549	0.0376159	0.0482647	0.00118446	0.0962121	-0.0565341	0.111745
(p.Ala.18.His)	A	18	H	var	1	-2.27255	0.251035	-3.61125	0.701626	0.35964	0.292686	-3.17705	0.589162	-2.89566	0.227214	-1.29328	1.17915	-2.45685	0.119856	-2.27974	1.32583	-2.11435	1.47878
(p.Ala.18.Ile)	A	18	I	var	1	1.09457	0.575764	0.378334	0.0711965	0.226099	0.200664	0.978726	0.0802505	0.188327	0.530362	0.0768134	0.160773	1.20296	0.0140037	0.128375	0.167229	0.943914	0.419405
(p.Ala.18.Lys)	A	18	K	var	1	0.940581		-0.0795019		-0.570688		0.669308	0.748971	-0.000135723	1.68367	0.359147	0.10066	0.831519	0.539299	-0.0258407	0.934851	1.31478	1.77115
(p.Ala.18.Leu)	A	18	L	var	1	0.610977	0.0641388	0.113278	0.0177824	0.00402646	0.0965412	0.767024	0.221968	0.103227	0.11512	0.0866543	0.0926962	0.951258	0.059202	0.072928	0.146009	0.849673	0.550163
(p.Ala.18.Met)	A	18	M	var	1	0.533189	0.114076	0.0319978	0.470757	-0.0504924	0.285091	1.03825	0.0190129	0.352598	0.357513	0.228788	0.179278	1.23198	0.0383353	0.323392	0.237201	1.10708	0.604299
(p.Ala.18.Asn)	A	18	N	var	1	0.405807	0.220988	-0.311521	0.302085	-0.0617833	0.00409252	0.51911	0.0599198	0.314802	0.112415	0.0828763	0.335896	0.884602	0.185505	0.213743	0.355504	1.41301	0.199642
(p.Ala.18.Pro)	A	18	P	var	1	1.04965	0.447871	0.173685	0.0721455	0.260246	0.0934531	0.439793	0.279333	-0.379149	0.520311	-0.0312946	0.351962	0.55543	0.48524	-0.00492621	0.245801	0.50146	0.780006
(p.Ala.18.Gln)	A	18	Q	var	1	0.613659	0.111822	0.487262	0.00837592	0.0951455	0.384847	0.797335	0.124357	0.0925952	0.0802683	0.0871683	0.270331	0.867909	0.0485579	0.17054	0.0241111	1.27662	0.672412
(p.Ala.18.Arg)	A	18	R	var	1	0.109148	0.509184	-0.0566317	0.370039	-0.0834753	0.213456	0.200381	0.103171	-0.0401672	0.105368	-0.0345905	0.0692262	0.377239	0.100789	-0.158387	0.190793	0.672402	0.773279
(p.Ala.18.Ser)	A	18	S	var	1	0.460596	0.0749796	0.0149256	0.151672	-0.0989682	0.0357128	0.748178	0.179672	0.154685	0.0257267	0.0248286	0.0852453	0.902138	0.0401491	-0.00499525	0.182548	0.857359	0.415054
(p.Ala.18.Thr)	A	18	T	var	1	0.624587	0.205112	-0.122355	0.0558154	0.029999	0.229714	0.682543	0.355509	0.127004	0.179241	-0.0209122	0.0477018	0.843143	0.181799	0.190646	0.202282	0.889449	0.624608
(p.Ala.18.Val)	A	18	V	var	1	0.632738	0.00574483	0.00402342	0.058734	0.054291	0.142936	0.709682	0.203661	0.0620884	0.00226802	0.0095605	0.11092	0.902221	0.0514669	0.0832294	0.105414	0.700905	0.488336
(p.Ala.18.Trp)	A	18	W	var	1	0.658015	0.0348105	0.0259161	0.079051	0.0840187	0.139844	0.859944	0.129877	0.160544	0.0746056	0.16188	0.0192543	1.00371	0.0181559	0.199756	0.0261359	0.906604	0.610016
(p.Ala.18.Tyr)	A	18	Y	var	1	0.0653127	0.590453	0.212124	0.0914787	-0.117768	0.0646449	1.06627	0.272439	0.0773629	0.147836	0.24306	0.24792	1.36444	0.273724	0.137044	0.150366	1.29906	1.06243
(p.Ile.19.Ter)	I	19	*	var	1	-2.26024	0.172351	-1.79569	0.252202	0.0835586	0.115913	-3.07734	0.57871	-2.04351	0.302028	-0.197846	0.270865	-2.19005	0.573682	-1.40203	0.518942	-2.27159	0.882917
(p.Ile.19.Ala)	I	19	A	var	1	0.293277	0.0464478	-0.000329646	0.0860249	-0.0441132	0.0876312	0.149343	0.0246161	0.113923	0.0190975	0.0894567	0.0231855	0.020985	0.0246013	0.123627	0.0718796	0.120509	0.00454007
(p.Ile.19.Cys)	I	19	C	var	1	-0.901081	0.653534	-0.00999353	0.0222556	-0.0798899	0.0272738	-0.648986	0.447068	-0.0228345	0.0606768	0.0826123	0.138293	-0.670922	0.37202	0.0472779	0.158796	-0.504416	0.506029
(p.Ile.19.Asp)	I	19	D	var	1	0.708779	0.280368	-0.257383	0.0977354	-0.109223	0.0228168	0.509831	0.206615	-0.0651736	0.0633477	-0.0885178	0.14063	0.416311	0.190182	-0.065908	0.135897	0.615415	0.733767
(p.Ile.19.Glu)	I	19	E	var	1	0.662219	0.0250131	-0.067219	0.0308434	0.0251437	0.00568938	0.788702	0.0546469	0.0501376	0.280991	0.0816132	0.173579	0.973914	0.0845253	0.154673	0.300985	0.934244	0.63847
(p.Ile.19.Phe)	I	19	F	var	1	-0.54237	0.86583	0.227152	0.209728	-0.00338492	0.15481	-1.8296	0.138239	-0.0229433	0.0285263	-0.211975	0.236696	-1.73378	0.0732832	-0.177596	0.0718473	-1.24587	0.396324
(p.Ile.19.Gly)	I	19	G	var	1	0.570434	0.0339535	0.00855087	0.0781944	-0.000678988	0.0132965	0.596743	0.173445	-0.0281346	0.050562	0.000505357	0.0883714	0.540821	0.0756355	-0.02217	0.0480864	0.482866	0.366819
(p.19.=)	I	19	I	syn	1	0.097557	0.087207	0.179534	0.120399	0.0621804	0.215128	-0.193024	0.163997	-0.10171	0.0403134	0.00963056	0.0732701	-0.227181	0.084897	-0.0517881	0.0248294	-0.256297	0.373515
(p.Ile.19.Lys)	I	19	K	var	1	0.776045	0.139297	0.215826	0.254347	0.104036	0.2967	0.812059	0.0884708	-0.0141521	0.380959	0.122181	0.43578	0.993664	0.0652618	-0.0537295	0.366188	1.25236	0.748213
(p.Ile.19.Leu)	I	19	L	var	1	0.0904414	0.238605	0.21347	0.236798	-0.0982826	0.284578	-0.24678	0.080029	0.0993901	0.448525	0.0160388	0.0963958	-0.0112354	0.103851	0.058404	0.040434	-0.153457	0.10604
(p.Ile.19.Met)	I	19	M	var	1	0.0776805	0.293433	0.231736	0.059846	-0.222509	0.109444	0.050435	0.0071188	0.0328152	0.0559287	0.0313696	0.108582	0.085035	0.124313	0.0812916	0.0760495	0.0650052	0.289409
(p.Ile.19.Asn)	I	19	N	var	1	0.478894	0.0467789	0.110635	0.146963	0.0928128	0.020303	0.29496	0.32311	0.253617	0.0886308	0.123006	0.167279	0.442521	0.226651	0.0278999	0.27407	0.184446	0.0238148
(p.Ile.19.Pro)	I	19	P	var	1	-1.97872	0.00947894	0.559282	0.23509	0.22756	0.161887	-2.98762	0.98829	0.135352	0.242504	-0.0793451	0.324649	-2.05663	0.673069	0.0860571	0.462768	-1.5579	1.2088
(p.Ile.19.Gln)	I	19	Q	var	1	1.36378	0.443733	0.373004	0.247448	0.108735	0.505019	0.061703		0.0723628		-1.15464		0.128249		-0.0494504		-0.130258
(p.Ile.19.Arg)	I	19	R	var	1	-2.81926	0.406538	0.131851	0.0614632	0.070577	0.0528001	-2.59366	0.0238845	0.146773	0.110956	0.0248981	0.180928	-1.99178	0.343845	0.0843979	0.0912615	-1.41363	0.781693
(p.Ile.19.Ser)	I	19	S	var	1	-0.787525	0.159929	0.0629658	0.0844357	0.0871769	0.0410775	-0.819889	0.074809	0.0738954	0.0732291	-0.0233018	0.325078	-0.970985	0.00113965	-0.0804116	0.0302005	-0.724512	0.315909
(p.Ile.19.Thr)	I	19	T	var	1	-0.0493082	0.00965608	-0.042859	0.12013	-0.0720961	0.147692	0.00217635	0.168471	-0.110079	0.0751772	0.0528692	0.078527	-0.0166191	0.286496	0.117347	0.0879498	-0.140084	0.250633
(p.Ile.19.Val)	I	19	V	var	1	0.656543	0.241972	0.0744633	0.0241218	0.0595776	0.00032075	0.473271	0.045584	0.0205251	0.022579	0.0233885	0.0787135	0.45395	0.0666524	0.0625095	0.0863604	0.296365	0.128343
(p.Ile.19.Trp)	I	19	W	var	1	0.580663	0.261391	0.0155252	0.311434	0.201668	0.254579	-0.165862	0.598471	0.0208433	0.132579	0.10021	0.170219	-0.0931867	0.278523	-0.0904973	0.312738	0.0424247	0.308548
(p.Ile.19.Tyr)	I	19	Y	var	1	-0.968372	0.947502	0.107753	0.335084	0.142289	0.354811	-0.604465	0.465464	0.0550999	0.107263	0.0517698	0.04525	-0.918748	0.390062	0.23092	0.00412488	-0.544759	0.622305
(p.Ala.20.Ter)	A	20	*	var	1	-3.53706	0.40714	-2.78212	0.361423	-0.231936	0.263526	-3.84379	0.0448021	-2.83774	0.0851948	-0.409228	0.517291	-2.1568	0.214228	-1.77229	0.415314	-2.6185	0.577576
(p.20.=)	A	20	A	syn	1	0.701197	0.374562	0.0654235	0.0128393	-0.0321541	0.0446972	0.74703	0.13117	0.213689	0.0320767	0.190375	0.184647	0.711939	0.147998	0.0213715	0.285662	0.829686	0.388245
(p.Ala.20.Cys)	A	20	C	var	1	0.627157	0.193891	0.0582818	0.165792	0.0229742	0.184525	0.660364	0.053426	0.286477	0.00235476	0.258785	0.00718175	0.723408	0.173483	0.249683	0.0500945	0.668962	0.157016
(p.Ala.20.Asp)	A	20	D	var	1	0.809237	0.266297	0.140598	0.10879	0.099717	0.0440138	0.847715	0.0827791	0.0364749	0.147162	0.15829	0.0451252	0.906887	0.0198214	0.107738	0.223553	0.86597	0.427733
(p.Ala.20.Glu)	A	20	E	var	1	0.47044	0.0893001	0.0233014	0.0467051	0.0762577	0.0242881	0.560155	0.0319859	0.0728328	0.003594	0.0211995	0.00944865	0.504206	0.0513892	0.00412403	0.0438177	0.53319	0.366837
(p.Ala.20.Phe)	A	20	F	var	1	0.466169	0.190066	0.242753	0.0741722	0.0690096	0.675029	0.444743	0.105949	-0.115826	0.147916	-0.0301579	0.270889	0.461399	0.13652	0.0505814	0.151689	0.273669	0.129093
(p.Ala.20.Gly)	A	20	G	var	1	0.362706	0.057385	0.0750784	0.0877997	0.039041	0.0264226	0.331809	0.0218683	0.0463038	0.0967947	0.0283924	0.128702	0.289503	0.0807141	0.0407398	0.00752094	0.261407	0.129072
(p.Ala.20.His)	A	20	H	var	1	0.584297	1.09081	-0.369709	1.63017	0.108735	0.537208	0.0746259	0.353711	0.143819	1.09819	-0.509336	0.873605	0.470478	0.0824604	0.313195	0.37188	0.417799	0.403083
(p.Ala.20.Ile)	A	20	I	var	1	0.255126	0.207072	-0.118032	0.0284506	-0.0227821	0.104061	0.306022	0.200213	-0.0845312	0.0858392	-0.0172197	0.340957	0.610408	0.0247358	-0.00271408	0.0251056	0.498452	0.169591
(p.Ala.20.Lys)	A	20	K	var	1	0.570682	0.519109	0.019519	0.177474	0.104693	0.0681728	0.661607	0.242283	-0.0227553	0.292088	0.0173836	0.382666	0.77744	0.250938	0.14577	0.112351	0.814687	0.581867
(p.Ala.20.Leu)	A	20	L	var	1	0.275701	0.328607	0.133221	0.178829	0.0255024	0.0338646	0.205915	0.0139727	0.106039	0.107638	0.0299888	0.0550274	0.181289	0.00614795	0.0394127	0.117241	0.131097	0.021296
(p.Ala.20.Met)	A	20	M	var	1	0.00436286	0.593864	0.038886	0.0725778	-0.0260161	0.118766	0.472292	0.0949009	0.0620214	0.0252515	-0.0655177	0.363058	0.574974	0.157101	0.291973	0.0255131	0.435786	0.345608
(p.Ala.20.Asn)	A	20	N	var	1	0.252584	0.168797	0.0980209	0.504657	-0.0765866	0.034813	0.407914	0.448397	-0.2563	0.469307	-0.166324	0.252205	0.415368	0.300563	-0.0170615	0.319096	0.63062	0.910449
(p.Ala.20.Pro)	A	20	P	var	1	-2.1283	0.568696	-0.298345	0.234588	0.0414508	0.0687281	-2.05259	0.0846328	-0.121737	0.0637639	-0.0946472	0.056698	-1.43439	0.464105	0.0910696	0.127129	-1.22152	0.822495
(p.Ala.20.Gln)	A	20	Q	var	1	0.501531	0.110882	0.0787135	0.051001	-0.0211678	0.0107949	0.509903	0.0612853	-0.0771812	0.0540612	0.0523507	0.109316	0.60316	0.034973	0.160217	0.295482	0.446973	0.070654
(p.Ala.20.Arg)	A	20	R	var	1	-0.52267	0.649538	0.0190335	0.14024	0.0705264	0.154036	-0.0593927	0.241411	0.10428	0.0900703	-0.00545777	0.11239	0.280638	0.00993146	0.0644245	0.181879	0.76697	0.714794
(p.Ala.20.Ser)	A	20	S	var	1	-0.152074	0.424631	0.0678496	0.0470173	0.0331115	0.103961	0.143019	0.134351	0.0346849	0.237655	-0.0411204	0.187385	0.255944	0.148832	-0.0480467	0.0540802	0.245248	0.295609
(p.Ala.20.Thr)	A	20	T	var	1	0.359049	0.103783	-0.102851	0.0140948	-0.184591	0.123235	0.422842	0.288488	0.186408	0.248118	-0.00799329	0.0440779	0.508844	0.324008	0.124693	0.288345	0.557517	0.585119
(p.Ala.20.Val)	A	20	V	var	1	0.500889	0.10809	0.049317	0.160303	0.11009	0.117212	0.48234	0.151743	0.129571	0.146583	0.158945	0.135962	0.485778	0.051466	0.0816539	0.0549007	0.375871	0.225271
(p.Ala.20.Trp)	A	20	W	var	1	-0.482632	0.200851	0.156538	0.129572	0.118289	0.172203	-0.353449	0.00718926	0.0358133	0.187753	0.106928	0.146275	-0.25635	0.0124968	0.109558	0.102963	-0.0542535	0.127947
(p.Ala.20.Tyr)	A	20	Y	var	1	0.812286	0.215728	0.18554	0.604162	0.139926	0.0917526	0.476843	0.372132	0.126007	0.264973	-0.0285155	0.305924	0.805795	0.193715	0.141218	0.141284	0.54492	0.22713
(p.Ser.21.Ter)	S	21	*	var	1	-5.3586	0.487447	-4.25942	0.0924749	-0.278331	0.271018	-5.70294	0.100636	-3.84127	0.474643	-0.606736	0.716729	-2.69484	0.668939	-1.91972	0.390775	-3.07213	1.00101
(p.Ser.21.Ala)	S	21	A	var	1	0.143457	0.0234489	0.0761276	0.145164	0.0482566	0.204525	0.152631	0.0652515	0.0933897	0.146761	0.0795215	0.260031	0.112287	0.0981048	0.123345	0.106364	0.142077	0.012661
(p.Ser.21.Cys)	S	21	C	var	1	-0.31644	0.126124	0.114415	0.145522	0.0908426	0.0884895	-0.495119	0.35523	0.0656349	0.0207683	0.0625309	0.0564028	-0.621148	0.0913777	0.155253	0.0275454	-0.309502	0.395005
(p.Ser.21.Asp)	S	21	D	var	1	0.605212	0.0116025	0.0917071	0.122075	0.0673887	0.00872864	0.00681662	0.0240508	0.056033	0.0860381	0.111911	0.174784	0.258501	0.198381	-0.0971924	0.0256623	0.0576971	0.00663227
(p.Ser.21.Glu)	S	21	E	var	1	0.347116	0.319073	-0.0973356	0.219412	0.0890554	0.0417484	0.355081	0.233988	0.115635	0.0542587	0.00896054	0.311443	0.506928	0.214835	0.0630443	0.223846	0.554091	0.148555
(p.Ser.21.Phe)	S	21	F	var	1	-1.70631	1.27498	-0.230306	0.34078	-0.345044	0.628395	-1.46431	0.224348	-0.108393	0.315569	-0.0728644	0.535641	-0.850553	0.020512	0.301036	0.307993	-0.584602	0.635749
(p.Ser.21.Gly)	S	21	G	var	1	0.447062	0.106697	0.0902106	0.0150718	0.0594277	0.000203293	0.0371768	0.241661	0.0422374	0.0471713	0.00691852	0.0743879	0.0952446	0.0646236	0.0503561	0.0137164	-0.167833	0.359958
(p.Ser.21.His)	S	21	H	var	1	-0.800088	0.19187	-0.0639132	0.0126849	-0.0332698	0.0949361	-0.810634	0.0223132	0.22979	0.201006	0.138465	0.197133	-0.97781	0.251259	0.15441	0.0170719	-0.433297	0.457673
(p.Ser.21.Ile)	S	21	I	var	1	-0.0856325	0.366548	0.301961	0.318806	0.15402	0.104547	-0.311942	0.314726	0.144107	0.463981	0.244849	0.100218	-0.176164	0.0849607	0.555548	0.265259	-0.217564	0.419498
(p.Ser.21.Lys)	S	21	K	var	1	-0.708303	1.34636	-0.0579267	0.137204	-0.185442	0.0334107	0.116805	0.181023	0.152309	0.168231	0.0414841	0.0909799	0.148812	0.00439296	0.0289539	0.206881	0.505333	0.489208
(p.Ser.21.Leu)	S	21	L	var	1	0.104472	0.20976	0.0668352	0.12914	-0.00611988	0.195308	-0.0954953	0.11401	0.00440007	0.136242	0.147875	0.115333	0.0117462	0.0407815	0.131806	0.0911583	-0.534854	0.639869
(p.Ser.21.Met)	S	21	M	var	1	0.540353	0.143139	-0.0493461	0.158245	0.0288966	0.0199063	0.510385	0.348962	0.0153855	0.204216	0.0327552	0.180577	0.59926	0.135239	-0.0143588	0.205254	0.0984623	0.0709816
(p.Ser.21.Asn)	S	21	N	var	1	-0.319106	0.0047334	-0.215373	0.0809797	0.031837	0.0605421	-0.662302	0.0261611	-0.0546598	0.323088	-0.0238825	0.330713	-0.860202	0.0528358	0.0472539	0.106829	-0.216697	0.112167
(p.Ser.21.Pro)	S	21	P	var	1	0.0561989	0.547054	-0.0380692	0.203705	-0.0806735	0.00525807	0.435331	0.0527215	0.154757	0.12689	0.169958	0.071979	0.373913	0.076308	0.167488	0.0761394	0.303407	0.169567
(p.Ser.21.Gln)	S	21	Q	var	1	0.0926444	0.0348224	-0.07286	0.0329203	-0.0266514	0.0747952	0.104531	0.132859	-0.0925032	0.0955114	-0.102461	0.169399	0.198954	0.0108987	-0.0934155	0.0260177	0.284494	0.504411
(p.Ser.21.Arg)	S	21	R	var	1	0.154771	0.0460089	0.000195467	0.052013	-0.0201309	0.0516624	0.00677033	0.0567843	0.0238409	0.0986402	-0.00961922	0.186686	0.0643269	0.0549094	-0.0314363	0.0648029	0.213573	0.189405
(p.21.=)	S	21	S	syn	1	-0.123461	0.135895	0.0463626	0.277997	-0.0027	0.17634	-0.172192	0.0119847	-0.0431951	0.00263746	0.029992	0.164444	-0.16513	0.104235	0.0746641	0.0650477	-0.151668	0.249794
(p.Ser.21.Thr)	S	21	T	var	1	0.192212	0.406439	0.0817791	0.196844	0.275871	0.119464	0.0793747	0.0536994	0.13934	0.169373	0.187506	0.0655743	0.0342375	0.0481359	0.261246	0.00292804	-0.0206946	0.50318
(p.Ser.21.Val)	S	21	V	var	1	0.327277	0.0614979	0.09085	0.0148385	0.0764683	0.0575593	0.306815	0.00428845	-0.0762178	0.0762111	-0.0559696	0.0629756	0.236131	0.101209	0.0771571	0.0378126	-0.213827	0.346413
(p.Ser.21.Trp)	S	21	W	var	1	0.844381	0.275638	0.199069	0.0631761	0.239607	0.0184977	0.692629	0.173775	0.0176976	0.128766	0.0394727	0.204455	0.77413	0.186589	0.0472434	0.145675	-0.172652	0.46602
(p.Ser.21.Tyr)	S	21	Y	var	1	-1.201	1.4315	-0.089	0.348161	-0.0573211	0.308108	-0.670748	0.394189	0.4631	0.0704782	0.367684	0.115611	-0.614373	0.59495	-0.100571	0.446413	-0.513087	0.739642
(p.Pro.22.Ter)	P	22	*	var	1	-5.78642	0.425539	-3.96204	0.182522	-0.0319773	0.0472872	-6.05111	0.238676	-3.98962	0.221487	-0.300901	0.322385	-2.72386	0.569109	-2.18038	0.560854	-3.00619	0.734107
(p.Pro.22.Ala)	P	22	A	var	1	0.0571871	0.0942393	0.0690997	0.0676675	0.0354277	0.0562744	0.0446599	0.113074	0.0449721	0.0961788	0.0566849	0.0546443	-0.0249558	0.0561978	0.171421	0.0554588	0.0129341	0.241598
(p.Pro.22.Cys)	P	22	C	var	1	0.261567	0.0921318	0.141949	0.114892	0.104613	0.0549389	0.239376	0.172279	-0.121484	0.196855	0.0359037	0.238385	0.323051	0.127938	0.0847151	0.0669501	0.214157	0.184655
(p.Pro.22.Asp)	P	22	D	var	1	-0.0136859	0.194153	0.0863114	0.103156	0.177351	0.240335	-0.131898	0.0201917	0.126772	0.0769465	0.0544042	0.230441	-0.0987606	0.0626394	0.207201	0.185433	-0.223502	0.24596
(p.Pro.22.Glu)	P	22	E	var	1	-0.26453	0.0221957	-0.08246	0.129998	-0.04999	0.253914	-0.576439	0.272531	-0.0725644	0.121598	0.00379913	0.153245	-0.582039	0.139049	-0.0861489	0.161565	-0.861382	0.687681
(p.Pro.22.Phe)	P	22	F	var	1	-0.799801	0.211535	-0.0483544	0.0287654	0.0296991	0.146843	-1.02874	0.334408	-0.0305838	0.303832	0.0350532	0.127812	-0.826351	0.201894	0.152283	0.0917487	-0.589401	0.439938
(p.Pro.22.Gly)	P	22	G	var	1	-0.213984	0.178889	0.0379373	0.0252535	0.0267133	0.0220867	-0.36172	0.134979	0.0285126	0.134276	0.0641197	0.181717	-0.363012	0.027294	0.0971072	0.0980012	-0.314388	0.272238
(p.Pro.22.His)	P	22	H	var	1	0.889215	0.612355	-0.107025	0.0033083	0.03919	0.0307369	0.627402	0.0396573	-0.0442249	0.0427851	0.0893537	0.0433179	0.550482	0.128732	0.109965	0.062861	-0.174253	0.108696
(p.Pro.22.Ile)	P	22	I	var	1	-1.56773	0.821712	0.0431914	0.136771	0.107147	0.115741	-1.14694	0.35488	0.140304	0.218613	0.218306	0.096824	-1.00206	5.2673e-05	0.196616	0.00640016	-0.586363	0.820432
(p.Pro.22.Lys)	P	22	K	var	1	-0.0522653	0.0946598	0.0905472	0.0889297	0.219055	0.0819323	-0.0616612	0.158055	-0.0612137	0.0424672	0.0815106	0.000684629	-0.122431	0.190451	0.115718	0.172066	-0.164645	0.251057
(p.Pro.22.Leu)	P	22	L	var	1	0.129153	0.191814	-0.0771358	0.0120172	-0.0337466	0.064357	0.0561439	0.0293764	0.0264012	0.251514	0.110411	0.119893	0.12495	0.0702288	0.0520268	0.215842	-0.148746	0.487797
(p.Pro.22.Met)	P	22	M	var	1	0.134064	0.313325	-0.048936	0.692961	-0.891265	0.505019	-0.183085	0.561147	-0.15797	0.640251	-1.38678	0.498964	-0.490409	2.07416	0.147204	0.984901	-0.675135	0.456061
(p.Pro.22.Asn)	P	22	N	var	1	-0.195428	0.241049	-0.182796	0.069156	-0.0426656	0.0160616	-0.4238	0.354046	-0.0798353	0.00579745	0.0766434	0.0261582	-0.391674	0.0111166	0.0219294	0.0727268	-0.559165	0.559826
(p.22.=)	P	22	P	syn	1	0.203937	0.493068	-0.0941906	0.0317341	0.0287877	0.18551	0.116901	0.0635034	-0.0041376	0.0046733	0.0195591	0.0342733	0.0295255	0.18806	0.0544571	0.150572	-0.0301954	0.156009
(p.Pro.22.Gln)	P	22	Q	var	1	0.496709	0.278849	0.0356818	0.168267	0.11656	0.248554	0.359145	0.133097	-0.134425	0.290837	-0.0255728	0.188048	0.307735	0.31996	-0.0487503	0.121041	-0.477534	0.176612
(p.Pro.22.Arg)	P	22	R	var	1	-0.269845	0.379906	0.0231547	0.0512176	0.0816773	0.00788914	0.155328	0.0653635	-0.0480798	0.162897	0.0147048	0.155905	0.185103	0.105864	0.0651487	0.105082	0.0829974	0.193745
(p.Pro.22.Ser)	P	22	S	var	1	-0.191959	0.302774	-0.00891436	0.0871004	0.0208429	0.154117	-0.190415	0.000154513	-0.00732868	0.105676	0.0440178	0.166597	-0.198824	0.0333961	0.0349222	0.101864	-0.232278	0.221684
(p.Pro.22.Thr)	P	22	T	var	1	-0.128162	0.121363	-0.133628	0.21731	0.241285	0.116721	-0.243656	0.0583392	-0.00925554	0.186482	-0.0830513	0.218305	-0.188155	0.0345337	0.0239652	0.102742	-0.348303	0.0828963
(p.Pro.22.Val)	P	22	V	var	1	-0.167277	0.210416	0.00952056	0.0832968	0.0975515	0.207133	-0.124702	0.116958	0.00966323	0.152535	0.0128885	0.132176	-0.119495	0.0724812	0.118656	0.0724021	-0.114797	0.314498
(p.Pro.22.Trp)	P	22	W	var	1	0.543095	0.0721758	-0.0915296	0.0877525	-0.211869	0.145438	0.292978	0.0702408	0.0212929	0.0962759	-0.00216769	0.083172	0.37087	0.0215113	0.130198	0.00276995	0.0789273	0.070815
(p.Pro.22.Tyr)	P	22	Y	var	1	-0.0326299	0.345096	0.0229638	0.036644	-0.00231933	0.027962	-0.0931639	0.216314	-0.0108804	0.108969	-0.034052	0.126484	-0.0769065	0.144157	0.0327037	0.131823	-0.244485	0.61959
(p.Leu.23.Ter)	L	23	*	var	1	-3.65557	0.820265	-3.84763	0.277868	-0.0988298	0.0205216	-5.4706	0.881065	-3.78855	0.216733	-0.342158	0.203153	-2.45129	0.391295	-1.93854	0.62381	-3.04594	0.806937
(p.Leu.23.Ala)	L	23	A	var	1	-0.206582	0.261177	-0.00875404	0.159645	0.0915375	0.146986	-0.0183496	0.033549	-0.0153908	0.0861717	0.0476458	0.270761	-0.257641	0.160691	0.0325414	0.0147623	-0.0553176	0.0599857
(p.Leu.23.Cys)	L	23	C	var	1	-0.965993	0.247799	0.0730799	0.00111054	0.104856	0.246766	-2.46249	0.0416353	0.0686277	0.222847	-0.0324191	0.00484101	-1.90084	0.425299	0.104674	0.124162	-1.27936	1.05493
(p.Leu.23.Asp)	L	23	D	var	1	0.558263	0.320307	-0.00706221	0.388105	-0.0278776	0.280888	0.680101	0.0640583	0.0122161	0.158877	0.0216279	0.104222	0.534989	0.00581923	0.0540543	0.115297	0.588408	0.305885
(p.Leu.23.Glu)	L	23	E	var	1	0.173935	0.102175	-0.00371101	0.00566469	0.0298438	0.142666	0.183672	0.0533953	-0.010838	0.144811	0.0600652	0.159833	0.0646565	0.00976464	0.0951019	0.0527531	0.00181984	0.129275
(p.Leu.23.Phe)	L	23	F	var	1	0.183832	0.465853	-0.00677042	0.0867925	-0.0459397	0.235176	0.514465	0.0591228	-0.00388371	0.0493641	0.138799	0.0379856	0.401711	0.0138692	-0.00100559	0.0791578	0.286917	0.0965255
(p.Leu.23.Gly)	L	23	G	var	1	-0.0876129	0.142184	-0.0609183	0.0399615	-0.03567	0.121596	-0.649788	0.237561	-0.0100037	0.107731	0.00446198	0.0945851	-0.637776	0.172434	-0.0145315	0.0229429	-0.432383	0.44454
(p.Leu.23.His)	L	23	H	var	1	0.83626	0.362498	0.295954	0.195959	0.121971	0.369681	0.474956	0.221909	-0.0774452	0.264779	-0.198174	0.37608	0.0485921	0.00799871	0.105677	0.0530586	0.365052	0.700475
(p.Leu.23.Ile)	L	23	I	var	1	0.812427	0.0540283	0.181006	0.0675906	0.0761645	0.160825	0.79045	0.2343	0.0631918	0.0247445	0.081962	0.0646042	0.948144	0.104764	0.0960269	0.186436	0.979236	0.604527
(p.Leu.23.Lys)	L	23	K	var	1	-0.0591114	0.268346	-0.161614	0.0130174	-0.0141957	0.00345255	0.254997	0.0559619	-0.123022	0.0678138	-0.018106	0.0973713	0.175476	0.000839699	-0.0729499	0.228456	0.0585237	0.0972388
(p.23.=)	L	23	L	syn	1	0.158068	0.0897718	0.157357	0.0260671	0.0184529	0.248187	0.299483	0.0162691	0.0251172	0.064348	0.123737	0.0902001	0.325079	0.0375369	0.154262	0.0379079	0.292684	0.0447249
(p.Leu.23.Met)	L	23	M	var	1	0.433869	0.284408	0.0437857	0.060261	-0.0354051	0.301174	0.576139	0.0144624	0.469019	0.141794	0.159823	0.168906	0.495881	0.202335	0.216455	0.00104621	0.606558	0.209647
(p.Leu.23.Asn)	L	23	N	var	1	0.790167	0.351567	0.0608001	0.0818465	-0.0578863	0.113073	0.634071	0.131031	-0.0156806	0.0427082	-0.085935	0.231302	0.730205	0.0654343	-0.0238168	0.138092	0.569129	0.420671
(p.Leu.23.Pro)	L	23	P	var	1	0.210387	0.0944963	-0.234618	0.0899142	-0.0739902	0.000286523	0.161736	0.0749128	0.10973	0.0815	-0.0380246	0.0382639	0.025218	0.0374603	0.0404533	0.162547	0.0613308	0.0444181
(p.Leu.23.Gln)	L	23	Q	var	1	0.244327	0.0979779	0.176951	0.0847873	0.398725	0.0470786	0.144285	0.14302	-0.118655	0.0276463	-0.00644079	0.115694	-0.0471499	0.0614278	0.019377	0.0231365	0.163408	0.251044
(p.Leu.23.Arg)	L	23	R	var	1	-0.0255102	0.24482	-0.0194862	0.0637681	-0.0777068	0.0297564	-0.193728	0.222139	0.0465092	0.0530688	0.0274003	0.175323	-0.172659	0.089489	0.10348	0.113804	-0.105623	0.302333
(p.Leu.23.Ser)	L	23	S	var	1	0.303132	0.375269	0.1276	0.133071	0.133063	0.0456995	0.458364	0.073097	-0.0611132	0.140384	0.00128671	0.253008	0.410683	0.12894	-0.0072705	0.0672495	0.240477	0.107412
(p.Leu.23.Thr)	L	23	T	var	1	0.303599	0.0935052	0.0813532	0.115325	-0.00990545	0.0595744	0.58812	0.370681	0.125589	0.333881	0.0670052	0.379272	0.489408	0.221383	0.0362985	0.142193	0.429675	0.441974
(p.Leu.23.Val)	L	23	V	var	1	0.33835	0.011779	0.0301567	0.0298571	0.0254077	0.108828	0.344009	0.094218	-0.0554079	0.056354	0.0682995	0.0771174	0.372001	0.027269	0.0739844	0.078672	0.318016	0.107573
(p.Leu.23.Trp)	L	23	W	var	1	-2.12175	0.889296	-0.00696452	0.120503	0.158241	0.186866	-2.70178	0.165185	0.0556933	0.103323	0.0302307	0.0879079	-2.18818	0.584301	0.149273	0.0684173	-1.83305	1.56172
(p.Leu.23.Tyr)	L	23	Y	var	1	0.589904	0.111838	0.0776466	0.00289129	0.0885769	0.15852	0.620653	0.241036	0.0174603	0.0678465	0.134491	0.0884878	0.604379	0.208516	0.160602	0.0344063	0.619806	0.550754
(p.Ala.24.Ter)	A	24	*	var	1	-4.41387	0.365981	-3.41429	0.0240576	-0.226053	0.218477	-4.60897	0.547819	-3.55839	0.0574488	-0.669233	0.602386	-2.30132	0.44716	-1.85551	0.441546	-2.91987	0.7783
(p.24.=)	A	24	A	syn	1	0.201254	0.252596	-0.111659	0.0486179	0.130162	0.0711544	-0.024793	0.0227783	0.0313436	0.156293	-0.00204157	0.153182	-0.0988902	0.115071	0.050038	0.0284849	-0.106761	0.173237
(p.Ala.24.Cys)	A	24	C	var	1	0.373591	0.00541926	-0.0538771	0.0823321	0.0680735	0.172854	0.458988	0.192067	0.079487	0.164716	0.0308272	0.277235	0.369537	0.0710276	0.0720843	0.0247097	0.358062	0.236591
(p.Ala.24.Asp)	A	24	D	var	1	0.183033	0.299923	-0.013097	0.162127	-0.0948	0.117188	0.409383	0.0656883	-0.254723	0.0334757	0.0191146	0.0103121	0.517275	0.127927	-0.159832	0.357603	0.309657	0.143923
(p.Ala.24.Glu)	A	24	E	var	1	0.226821	0.227276	-0.105461	0.0821209	-0.0193449	0.00876527	0.388561	0.0268368	-0.0430439	0.0909782	-0.00363114	0.135408	0.315805	0.0736041	-0.0800127	0.0627278	0.363218	0.323998
(p.Ala.24.Phe)	A	24	F	var	1	0.633391	0.152519	0.575289	0.215758	0.584791	0.327453	0.0943364	0.0147579	-0.138361	0.0555142	-0.280162	0.121594	-0.086306	0.105998	-0.0500899	0.0272309	-0.220126	0.249224
(p.Ala.24.Gly)	A	24	G	var	1	0.441373	0.0160534	-3.82928e-05	0.0150152	0.0402181	0.0397064	0.410501	0.00924805	0.0503644	0.0445132	0.0616949	0.139679	0.339345	0.0146537	0.043238	0.0610001	0.326765	0.0466708
(p.Ala.24.His)	A	24	H	var	1	0.109415	0.812927	0.141817	0.122673	0.500651	0.0170454	1.01447	0.105716	0.19687	0.289458	0.162379	0.24603	0.938805	0.125178	0.334801	0.162125	0.796123	0.000954037
(p.Ala.24.Ile)	A	24	I	var	1	0.430022	0.0183885	0.0858078	0.0710941	-0.036189	0.105202	0.189342	0.287422	-0.143135	0.0284285	0.220914	0.0168488	0.213393	0.182406	0.0563666	0.0919574	-0.33901	0.587962
(p.Ala.24.Lys)	A	24	K	var	1	0.501618	0.280932	0.179047	0.141865	0.138182	0.204766	0.665935	0.189974	-0.022935	0.0644383	0.108322	0.0915475	0.637283	0.151999	0.137802	0.0648179	0.603586	0.300629
(p.Ala.24.Leu)	A	24	L	var	1	0.0310371	0.247975	0.0628734	0.0194369	0.153996	0.149325	0.1465	0.128699	-0.0180483	0.0234312	0.0219534	0.0348616	0.266361	0.144603	-0.00501834	0.173228	-0.337047	0.687329
(p.Ala.24.Met)	A	24	M	var	1	0.198899	0.260663	0.047303	0.128842	-0.102633	0.35279	0.553147	0.1104	0.0931523	0.0294008	0.06015	0.157101	0.644248	0.174322	0.139017	0.00109087	0.0161328	0.517891
(p.Ala.24.Asn)	A	24	N	var	1	0.405807	0.553276	-0.0584904	0.171177	-0.295993	0.645471	0.411604	0.0921173	-0.616115	0.360538	-0.616842	0.297926	0.260188	0.557383	0.0959939	0.279675	0.16667	0.0095428
(p.Ala.24.Pro)	A	24	P	var	1	0.272072	0.119997	0.170221	0.191545	0.150762	0.0166146	0.179178	0.356374	-0.0321944	0.24194	-0.0724394	0.193735	0.323466	0.124698	0.0856464	0.114659	0.52098	0.463906
(p.Ala.24.Gln)	A	24	Q	var	1	0.550868	0.140288	-0.0403338	0.00325064	-0.0225695	0.287693	0.629541	0.0924016	0.0625028	0.00435447	0.0486812	0.181064	0.644791	0.0155762	0.0335557	0.00598081	0.654608	0.201085
(p.Ala.24.Arg)	A	24	R	var	1	0.361051	0.177551	-0.0380139	0.0112894	-0.0749171	0.0839855	0.516391	0.106925	0.0237669	0.0675605	0.0689441	0.210181	0.484819	0.0603234	-0.0569008	0.0192756	0.485728	0.216272
(p.Ala.24.Ser)	A	24	S	var	1	0.112695	0.0701128	-0.0372709	0.0634771	-0.0460667	0.121063	0.481108	0.0986327	0.0148579	0.119343	0.115305	0.189647	0.358372	0.0324456	0.195613	0.0068839	0.45677	0.291767
(p.Ala.24.Thr)	A	24	T	var	1	0.547961	0.561087	0.0425657	0.133283	0.0496202	0.379493	0.328213	0.126341	0.0141153	0.000913864	-0.00764594	0.183541	0.108314	0.0756018	-0.0183139	0.0277764	0.256053	0.1454
(p.Ala.24.Val)	A	24	V	var	1	0.13593	0.120507	0.0692905	0.0864445	0.0580508	0.0738708	0.201836	0.0704809	-0.0980275	0.0097462	-0.0490865	0.0652075	0.120134	0.0499731	0.00685552	0.08816	-0.042051	0.0947961
(p.Ala.24.Trp)	A	24	W	var	1	0.470117	0.0917356	0.0159008	0.119636	0.00358843	0.215256	0.391851	0.0356559	0.0388154	0.0216236	0.0347059	0.215306	0.495963	0.0374162	0.135625	0.0484596	-0.100299	0.447619
(p.Ala.24.Tyr)	A	24	Y	var	1	0.426546	0.19166	0.0509187	0.0532118	-0.125038	0.113505	0.304773	0.297154	-0.0871355	0.126321	-0.0677276	0.0631906	0.467945	0.118542	0.026233	0.124602	-0.0178511	0.465159
(p.Phe.25.Ter)	F	25	*	var	1	-5.0316	0.150989	-4.10785	0.21564	-0.288239	0.283908	-4.728	0.335971	-4.10123	0.795598	-0.509273	0.974469	-2.46261	0.467161	-2.00065	0.827861	-3.032	0.945027
(p.Phe.25.Ala)	F	25	A	var	1	0.0935717	0.0778479	-0.0745962	0.0900218	-0.0701777	0.0566353	0.055409	0.0895033	-0.0548665	0.0978182	0.083151	0.0868006	0.0813869	0.0277446	-0.02576	0.141781	0.00808985	0.112186
(p.Phe.25.Cys)	F	25	C	var	1	-0.173013	0.0666684	0.0530283	0.0992843	0.11254	0.123484	-0.158285	0.164492	0.0760131	0.0101208	0.0631628	0.160106	-0.306041	0.0767336	0.0915828	0.199387	-0.214771	0.361046
(p.Phe.25.Asp)	F	25	D	var	1	0.319278	0.483902	0.0953564	0.339711	0.00221199	0.211215	0.647341	0.336391	0.351006	0.126918	0.458311	0.0920971	0.586532	0.0803472	0.217957	0.0872653	0.37434	0.0653915
(p.Phe.25.Glu)	F	25	E	var	1	0.766186	0.403072	-0.212526	0.100939	0.118107	0.0757739	0.750964	0.100882	-0.00701914	0.00662498	0.136136	0.00245673	0.937824	0.0810867	0.0826572	0.36302	0.958188	0.720072
(p.25.=)	F	25	F	syn	1	-0.126329	0.0765166	0.0167535	0.59585	0.115058	0.387718	0.172083	0.0188271	-0.117048	0.0996402	-0.056308	0.210382	-0.087149	0.313966	-0.159701	0.226988	-0.114181	0.0680968
(p.Phe.25.Gly)	F	25	G	var	1	0.608963	0.0819828	-0.0204762	0.00055134	0.00847527	0.0555789	0.533524	0.0885926	-0.0212894	0.0225609	0.0725762	0.0832265	0.52589	0.042552	0.00434846	0.094026	0.556846	0.421082
(p.Phe.25.His)	F	25	H	var	1	-1.50617	1.35658	-0.371412	0.0267636	-0.532435	1.04363	-0.152541	0.0324492	0.275787	0.299266	0.32687	0.385135	-0.0311229	0.408905	0.32483	0.198404	0.108496	0.291722
(p.Phe.25.Ile)	F	25	I	var	1	0.283326	0.102237	-0.0405212	0.0862769	0.0220459	0.0150003	0.168744	0.0434595	0.0306247	0.215585	-0.181324	0.229345	0.10226	0.141656	-0.12228	0.246263	0.180416	0.126923
(p.Phe.25.Lys)	F	25	K	var	1	0.643295	0.276038	0.00939075	0.0602453	0.028423	0.0196846	0.726127	0.268539	0.0915397	0.302632	0.23466	0.0417635	1.01432	0.149102	0.269239	0.0548848	0.701163	0.58579
(p.Phe.25.Leu)	F	25	L	var	1	0.622081	0.173355	0.0438766	0.0288559	-0.0204608	0.0987529	0.626724	0.171043	0.0938794	0.0685311	0.0188704	0.0886978	0.741158	0.0580426	0.0474118	0.104497	0.641715	0.494712
(p.Phe.25.Met)	F	25	M	var	1	0.608461	0.382324	0.0730366	0.15769	-0.0202457	0.0648728	0.766338	0.371055	-0.0840567	0.0263994	-0.179473	0.212489	0.890362	0.0953842	-0.0854378	0.0592045	0.980476	0.80842
(p.Phe.25.Asn)	F	25	N	var	1	-0.240405	0.525458	0.30799	0.037901	-0.0626906	0.27746	-0.271882	0.265741	-0.0274723	0.24238	-0.0712616	0.344267	-0.179963	0.322104	-0.311318	0.0558269	-0.163891	0.139332
(p.Phe.25.Pro)	F	25	P	var	1	-0.659195	0.566002	0.0140294	0.120713	-0.0925918	0.151131	-0.214501	0.144291	-0.0314706	0.0982623	0.192545	0.27948	-0.279777	0.23838	-0.153633	0.0733509	-0.0428768	0.178651
(p.Phe.25.Gln)	F	25	Q	var	1	0.756821	0.0752027	0.138447	0.351485	0.0788735	0.451307	0.541817	0.473995	0.0464302	0.0695826	0.0840482	0.107744	0.760841	0.193955	0.0575332	0.108665	0.767801	0.602938
(p.Phe.25.Arg)	F	25	R	var	1	0.432474	0.079554	0.00905548	0.0313597	-0.0201803	0.0569423	0.483981	0.0571445	-0.0510202	0.0473561	0.059592	0.0585395	0.540168	0.00719038	0.0312187	0.113034	0.430355	0.235232
(p.Phe.25.Ser)	F	25	S	var	1	0.372772	0.0660405	-0.0047105	0.234359	-0.0136621	0.189833	0.255472	0.126477	0.114284	0.0276527	-0.0089842	0.0736156	0.247346	0.216165	0.0139712	0.0697511	0.331753	0.327454
(p.Phe.25.Thr)	F	25	T	var	1	0.0498657	0.349011	-0.00938594	0.202924	-0.103243	0.191574	-0.0297953	0.286	0.000524247	0.186245	-0.256666	0.206333	-0.161953	0.176545	-0.235895	0.248274	0.120038	0.149774
(p.Phe.25.Val)	F	25	V	var	1	0.480188	0.0841415	0.10347	0.229518	0.141871	0.0221718	0.480249	0.0963451	-0.0466954	0.0360226	0.0538726	0.0742957	0.523941	0.0553246	-0.0184609	0.112393	0.626783	0.51449
(p.Phe.25.Trp)	F	25	W	var	1	0.726786	0.196667	-0.0214381	0.0302147	-0.000764882	0.0802673	0.577008	0.367795	-0.0950757	0.0554438	-0.0378895	0.0449556	0.804317	0.26557	-0.0834777	0.145285	0.786144	0.634395
(p.Phe.25.Tyr)	F	25	Y	var	1	0.347869	0.729862	-0.062696	0.0333835	0.046529	0.100554	-0.116902	0.186021	-0.0202712	0.0260178	-0.13271	0.0285638	-0.0927049	0.0413292	-0.0256826	0.181352	-0.110664	0.103966
(p.Ser.26.Ter)	S	26	*	var	1	-4.63015	0.581998	-3.64148	0.101484	-0.191472	0.219107	-4.89397	0.222254	-3.57477	0.416033	-0.323882	0.408657	-2.57804	0.611872	-1.98148	0.429126	-3.15732	1.0034
(p.Ser.26.Ala)	S	26	A	var	1	0.711306	0.249133	0.0295349	0.0466902	0.0625702	0.144015	0.640923	0.115091	0.00754127	0.0417276	-0.0113506	0.0599625	0.729001	0.0275018	-0.0706746	0.163306	0.614608	0.498989
(p.Ser.26.Cys)	S	26	C	var	1	0.419446	0.0430393	0.0679321	0.053124	0.0961408	0.0363874	0.31586	0.00608179	0.00762584	0.154781	0.127173	0.143507	0.237881	0.0257361	0.0889048	0.00477707	0.113336	0.0328155
(p.Ser.26.Asp)	S	26	D	var	1	-0.0506795	0.255501	0.0356459	0.00951217	-0.0356008	0.116522	-0.306887	0.452965	-0.00366509	0.0907215	0.0224168	0.144063	-0.280685	0.175881	0.0721321	0.00708262	-0.20136	0.321985
(p.Ser.26.Glu)	S	26	E	var	1	-0.47295	0.319928	-0.0310376	0.102615	-0.0520288	0.113187	-0.706283	0.560632	-0.0456182	0.0332016	0.00611126	0.0358457	-0.70552	0.344089	0.0116987	0.199777	-0.552975	0.732654
(p.Ser.26.Phe)	S	26	F	var	1	-0.494838	0.440008	0.103916	0.21805	0.075565	0.0248916	-0.495882	0.540121	0.182542	0.365314	-0.132862	0.115	-0.369616	0.248812	0.0426074	0.252564	-0.138702	0.371553
(p.Ser.26.Gly)	S	26	G	var	1	0.124534	0.132609	0.0495922	0.0913371	0.0091623	0.00368532	0.0529425	0.0311616	-0.0155161	0.0188111	0.0169902	0.0856974	0.167454	0.00519954	0.0263098	0.129948	0.217724	0.190351
(p.Ser.26.His)	S	26	H	var	1	0.200754	0.550596	0.00449377	0.380856	-0.179293	0.51622	-0.0951009	0.0672523	-0.0848705	0.0227665	0.0257173	0.161023	0.0837276	0.0396652	-0.028075	0.0579135	0.266487	0.15892
(p.Ser.26.Ile)	S	26	I	var	1	-1.47887	1.52565	-0.146344	0.0115922	-0.0256063	0.00326062	-1.014	0.333026	-0.119816	0.156107	0.0418115	0.0683788	-0.672548	0.238073	0.0531182	0.0714858	-0.236959	0.735879
(p.Ser.26.Lys)	S	26	K	var	1	-0.0743668	0.665357	0.132482	0.0279256	-0.0874984	0.313552	-0.0943445	0.387881	0.0442594	0.0640212	-0.0514929	0.112422	-0.1969	0.135177	-0.0411641	0.0146078	-0.161502	0.0621161
(p.Ser.26.Leu)	S	26	L	var	1	-0.0562628	0.513433	0.0134789	0.0442597	-0.0521453	0.0782297	-0.221091	0.191651	0.0257477	0.0859395	0.128513	0.267146	0.122542	0.128416	0.13592	0.207094	0.185921	0.228254
(p.Ser.26.Met)	S	26	M	var	1	-0.108649	0.284587	-0.0916841	0.0669189	0.010775	0.183706	0.00834364	0.149662	-0.0322009	0.36284	-0.029657	0.724712	0.0855924	0.192002	0.564445	0.231523	0.728543	0.942087
(p.Ser.26.Asn)	S	26	N	var	1	-1.16412	1.13447	-0.19819	0.356681	0.091103	0.186334	-0.970599	0.485079	-0.366804	0.0685867	-0.283721	0.0166588	-0.761416	0.231704	-0.221124	0.0360857	-0.663161	0.486032
(p.Ser.26.Pro)	S	26	P	var	1	0.491112	0.329726	-0.0841403	0.0689867	0.0618384	0.0626358	0.236964	0.0829627	-0.0724533	0.1879	-0.0686604	0.163231	0.142442	0.0871096	-0.0575569	0.0377909	0.119878	0.214356
(p.Ser.26.Gln)	S	26	Q	var	1	-0.00137581	0.53736	-0.0823503	0.00526678	-0.0429284	0.199032	0.5422	0.0155733	0.239341	0.34355	0.137935	0.311726	0.545498	0.0663019	0.0963687	0.0550185	0.696739	0.00715354
(p.Ser.26.Arg)	S	26	R	var	1	0.434368	0.109081	-0.0403059	0.0371013	-0.0255356	0.0106967	0.312796	0.0443983	0.0799249	0.0840058	0.120428	0.0231798	0.336682	0.0919361	0.0421882	0.108866	0.272941	0.0251645
(p.26.=)	S	26	S	syn	1	-0.0696623	0.127818	-0.000170307	0.13813	0.0642536	0.137181	0.0150828	0.0347594	0.0504049	0.0566514	0.0298292	0.0802512	0.170392	0.0176827	0.13365	0.104441	0.291063	0.179773
(p.Ser.26.Thr)	S	26	T	var	1	0.01529	0.270615	0.0433639	0.122405	-0.03164	0.0664555	0.142507	0.265426	-0.0776368	0.0427212	0.0166377	0.173825	0.0357101	0.00659844	0.0470456	0.204371	0.13202	0.136675
(p.Ser.26.Val)	S	26	V	var	1	0.385599	0.324793	0.0185354	0.0558799	-0.016511	0.161165	0.133338	0.126652	-0.0703996	0.0384137	-0.0548565	0.14742	0.278361	0.0770749	-0.077783	0.018363	0.354386	0.172639
(p.Ser.26.Trp)	S	26	W	var	1	0.135684	0.385403	0.0247331	0.141334	0.126705	0.175404	-0.356409	0.353009	-0.0570355	0.0233876	0.0352533	0.0576266	-0.149027	0.221127	0.0146577	0.0232612	0.0875828	0.256535
(p.Ser.26.Tyr)	S	26	Y	var	1	-0.0171677	0.0724639	-0.0352216	0.0465564	-0.0361495	0.221331	-0.587326	0.602296	-0.369547	0.191019	-0.148624	0.008506	-0.534387	0.299968	-0.10564	0.114573	-0.352891	0.459425
(p.Val.27.Ter)	V	27	*	var	1	-5.36922	0.663743	-3.41955	0.239615	-0.164832	0.197147	-6.41714	0.180431	-3.48924	0.537782	-0.536468	0.44686	-3.09041	0.718368	-2.37292	0.697513	-3.1494	1.26646
(p.Val.27.Ala)	V	27	A	var	1	0.191045	0.35199	0.130637	0.037327	-0.015288	0.186761	0.189818	0.0030442	-0.0729012	0.0372608	0.0603302	0.0785859	0.149423	0.0777564	0.0623227	0.0391105	-0.0224498	0.103224
(p.Val.27.Cys)	V	27	C	var	1	-2.59565	0.503684	-0.0220832	0.129865	0.104045	0.0704972	-3.17651	0.158792	-0.0376906	0.0884253	-0.195413	0.130803	-2.08783	0.376353	0.046024	0.0265146	-2.01478	1.69586
(p.Val.27.Asp)	V	27	D	var	1	-0.0369708	0.217757	0.122527	0.421895	-0.0641562	0.212746	-0.103584	0.411954	-0.156746	0.0791389	-0.183175	0.269843	-0.301732	0.368686	-0.0701295	0.23691	-0.351803	0.585753
(p.Val.27.Glu)	V	27	E	var	1	-0.4854	0.278257	0.00592276	0.0913989	0.0348401	0.247361	-0.551685	0.20147	-0.0267491	0.0406198	-0.0442213	0.0233974	-0.590444	0.227187	-0.0904596	0.121352	-0.561671	0.564173
(p.Val.27.Phe)	V	27	F	var	1	-2.8961	1.26123	0.217652	0.46949	0.134787	0.0154482	-3.59857	0.884065	0.409095	0.184246	0.137343	0.492946	-2.31972	0.569758	0.130627	0.346381	-2.23642	1.47263
(p.Val.27.Gly)	V	27	G	var	1	-0.195777	0.182425	0.0938403	0.0708474	0.0452568	0.014939	-0.339284	0.227942	0.0379899	0.0250034	0.0156972	0.0518446	-0.420697	0.172448	0.0376414	0.130363	-0.366278	0.420005
(p.Val.27.His)	V	27	H	var	1	0.879991	0.540963	0.556166	0.0483435	-0.43782	0.691012	0.452663	0.406037	-0.282403	0.0464389	0.351897	0.892324	-0.169636	0.248967	-0.716252	1.00048	0.380381	0.0777248
(p.Val.27.Ile)	V	27	I	var	1	0.484324	0.682683	-0.181765	0.0871455	0.0903805	0.0543369	0.359935	0.127377	0.0236484	0.0532581	0.0511993	0.354368	0.303952	0.0602349	0.107956	0.232224	0.418796	0.32165
(p.Val.27.Lys)	V	27	K	var	1	-1.95354	1.31325	0.0751162	0.0669315	-0.0193377	0.0607181	-1.61216	0.283029	0.0174204	0.246568	0.0769569	0.191959	-1.35741	0.3433	0.105865	0.0332307	-0.964006	0.81732
(p.Val.27.Leu)	V	27	L	var	1	-1.05772	0.265257	0.000627674	0.0389619	-0.0268313	0.278756	-1.18837	0.371784	-0.00896712	0.0449848	-0.0577788	0.0251835	-1.06646	0.336971	0.00172045	0.0773141	-0.623822	0.480438
(p.Val.27.Met)	V	27	M	var	1	0.716666	0.0553223	-0.0186576	0.513329	0.0267014	0.232654	0.712098	0.083488	0.0481058	0.0489836	0.107289	0.241875	0.886281	0.220288	-0.169805	0.244616	0.88006	0.268794
(p.Val.27.Asn)	V	27	N	var	1	-0.10001	0.0177059	0.273581	0.268216	-0.161207	0.348404	0.0634015	0.194703	0.25125	0.252985	0.129669	0.679145	-0.0610516	0.0926503	0.350196	0.151979	-0.0167061	0.111854
(p.Val.27.Pro)	V	27	P	var	1	-0.63848	0.820437	-0.155724	0.157026	-0.128615	0.0285905	-0.232984	0.782059	0.226723	0.236976	-0.0173206	0.137387	-0.419816	0.58002	0.339509	0.294264	-0.359037	0.580925
(p.Val.27.Gln)	V	27	Q	var	1	-0.982178	1.36439	0.0782069	0.213033	0.118983	0.0581865	-0.734746	0.484695	0.0190322	0.278693	-0.0172462	0.0175841	-0.733073	0.456791	0.129488	0.279034	-0.472099	0.681677
(p.Val.27.Arg)	V	27	R	var	1	-0.931552	0.172167	0.0620956	0.0844194	-0.0100616	0.00809849	-1.30025	0.103284	0.0380582	0.163364	-0.0129203	0.130148	-1.07491	0.186072	0.0621161	0.0173829	-0.767374	0.501343
(p.Val.27.Ser)	V	27	S	var	1	0.302623	0.188568	0.16984	0.0421159	-0.0658456	0.0883098	0.110452	0.0219277	-0.15077	0.213156	-0.0161599	0.0117817	0.134456	0.0846432	-0.0113183	0.24861	-0.0546195	0.114914
(p.Val.27.Thr)	V	27	T	var	1	-0.121563	0.18615	0.0378995	0.109061	-0.0882201	0.168539	-0.00234606	0.12022	0.0389373	0.140234	0.149436	0.00887325	-0.0817026	0.0041846	0.173189	0.0356881	-0.0930687	0.312272
(p.27.=)	V	27	V	syn	1	0.485004	0.211853	0.0224523	0.0421155	-0.0556444	0.0830675	0.414892	0.0684396	0.0405292	0.0343653	0.0586173	0.047159	0.236519	0.0121536	0.0884817	0.101146	0.13413	0.0575536
(p.Val.27.Trp)	V	27	W	var	1	-1.20767	0.247321	0.0210932	0.00646554	-0.0810486	0.127869	-1.41855	0.512848	0.117546	0.00134901	0.0511261	0.0597862	-1.18192	0.330341	0.140716	0.169131	-0.728065	0.806745
(p.Val.27.Tyr)	V	27	Y	var	1	1.0622	0.211689	0.255345	0.0898658	0.289463	0.337521	0.217499	0.032246	-0.172381	0.321485	-0.235076	0.113756	0.245721	0.0326378	-0.164556	0.274879	-0.048168	0.122883
(p.Asp.28.Ter)	D	28	*	var	1	-5.23741	0.526067	-3.26672	0.0392787	-0.236987	0.253111	-5.48667	0.718925	-3.23218	0.159133	-0.744702	0.713109	-2.8127	0.815646	-1.91414	0.497542	-3.04274	0.906545
(p.Asp.28.Ala)	D	28	A	var	1	0.0553984	0.179889	0.0519802	0.0824011	-0.00727238	0.0661252	0.0511787	0.00486744	0.00442073	0.00670675	0.00295371	0.00297603	-0.0209941	0.147578	-0.0145128	0.105459	-0.00797461	0.0645652
(p.Asp.28.Cys)	D	28	C	var	1	-2.9618	0.255729	0.175542	0.139167	0.0543149	0.0414054	-2.43258	0.350974	-0.00159543	0.038721	0.00443122	0.035487	-2.01041	0.476545	0.00109114	0.0883362	-1.82922	1.38371
(p.28.=)	D	28	D	syn	1	0.3119	0.745853	-0.201401	0.175532	-0.172474	0.282755	0.0281768	0.204016	0.244664	0.0331466	0.323221	0.329847	0.0199702	0.487754	0.0669568	0.689178	-0.18663	0.147954
(p.Asp.28.Glu)	D	28	E	var	1	-0.108649	0.392442	0.234117	0.253046	0.0875577	0.228895	-0.233751	0.421431	0.131024	0.0349508	0.046796	0.0434718	-0.351445	0.136281	0.0777715	0.164118	-0.333892	0.378474
(p.Asp.28.Phe)	D	28	F	var	1	-1.08227	0.699822	0.131479	0.136342	-0.0064214	0.0389118	-0.975779	0.280257	-0.0243755	0.188603	0.0443855	0.0683101	-0.850882	0.156693	0.13008	0.0217117	-0.398881	0.58697
(p.Asp.28.Gly)	D	28	G	var	1	-0.0920276	0.0638127	0.0363865	0.0841835	0.00976173	0.0209565	-0.173372	0.11876	-0.0141245	0.00394397	-0.0352075	0.112857	-0.297174	0.0720975	0.00401227	0.0648055	-0.239091	0.238736
(p.Asp.28.His)	D	28	H	var	1	-0.427206	0.406678	0.0942849	0.339144	0.148955	0.34301	-0.616655	0.170578	-0.270609	0.0658726	-0.074571	0.107554	-0.645797	0.0167291	-0.169763	0.0851239	-0.439549	0.16139
(p.Asp.28.Ile)	D	28	I	var	1	-0.748261	0.496634	0.160861	0.100304	0.178169	0.026137	-0.604414	0.185589	0.0858848	0.134948	0.0440585	0.00826183	-0.498068	0.0285389	0.0616391	0.022031	-0.196072	0.129424
(p.Asp.28.Lys)	D	28	K	var	1	-1.16067	0.995335	0.0510486	0.0176191	-0.0170238	0.0381393	-0.415709	0.313612	0.063251	0.089515	0.0202305	0.233084	-0.627462	0.0073969	0.0424809	0.0661158	-0.2782	0.251582
(p.Asp.28.Leu)	D	28	L	var	1	-1.1722	0.303662	0.085376	0.114621	0.0023952	0.0247186	-0.931142	0.370477	0.0277976	0.0868494	0.0326649	0.0465403	-0.792442	0.176179	0.123667	0.0575898	-0.42475	0.540781
(p.Asp.28.Met)	D	28	M	var	1	-0.51585	0.326159	0.113459	0.17834	-0.0659898	0.0105501	-0.513473	0.210697	0.11859	0.108783	0.0164185	0.040119	-0.400274	0.180593	0.133362	0.100423	-0.216402	0.361174
(p.Asp.28.Asn)	D	28	N	var	1	-0.2203	0.00880124	0.16819	0.0885085	0.0526878	0.0367157	-0.411402	0.356146	-0.0595855	0.0766872	-0.183542	0.107035	-0.697725	0.283691	-0.0707025	0.133382	-0.452805	0.211759
(p.Asp.28.Pro)	D	28	P	var	1	-0.522181	0.498954	0.0841884	0.102198	0.0638368	0.418206	-0.537569	0.137336	-0.0605765	0.274175	0.00115308	0.192936	-0.750805	0.159161	0.109418	0.197287	-0.384192	0.241571
(p.Asp.28.Gln)	D	28	Q	var	1	-0.493858	0.4494	0.120117	0.113628	0.00652295	0.216866	-0.198311	0.0861862	0.164224	0.0762169	0.0411432	0.00358566	-0.331549	0.361423	0.156534	0.175594	-0.230872	0.310078
(p.Asp.28.Arg)	D	28	R	var	1	-0.321359	0.400921	0.0995143	0.130689	0.045133	0.0778337	-0.189828	0.233578	-0.0162668	0.0938478	0.0268668	0.0133346	-0.313912	0.10425	0.00151415	0.136886	-0.126123	0.24076
(p.Asp.28.Ser)	D	28	S	var	1	-0.703489	0.547095	0.0424914	0.028367	-0.0343765	0.0398952	-0.368261	0.157973	0.0737648	0.0180828	-0.0626783	0.0386399	-0.451849	0.102853	0.0104719	0.00516518	-0.313317	0.357794
(p.Asp.28.Thr)	D	28	T	var	1	-0.937518	0.85889	0.0321379	0.051278	0.0276835	0.104288	-0.697897	0.00377131	0.0643112	0.0736372	0.203893	0.00571125	-0.504241	0.365	0.204675	0.0662321	-0.315815	0.361112
(p.Asp.28.Val)	D	28	V	var	1	-0.31404	0.29858	0.106216	0.109567	0.0421961	0.05911	-0.29226	0.20058	-0.00116881	0.0411099	0.00488213	0.00661024	-0.342903	0.120832	0.0187227	0.122707	-0.252516	0.306012
(p.Asp.28.Trp)	D	28	W	var	1	0.0864451	0.132082	0.179353	0.0998265	-0.00213393	0.0562122	0.114042	0.182729	-0.042774	0.0519946	-0.0451828	0.00996789	0.0813557	0.0691288	0.0258241	0.137649	0.434257	0.373447
(p.Asp.28.Tyr)	D	28	Y	var	1	-1.0275	0.687445	0.121463	0.130397	-0.0325058	0.102865	-0.979993	0.454876	-0.20772	0.033692	-0.0263713	0.00672099	-1.17702	0.22811	0.0981828	0.158921	-0.537039	0.466591
(p.Ser.29.Ter)	S	29	*	var	1	-2.97293	1.00409	-2.39869	0.0248864	0.0726516	0.295673	-2.6986	0.400153	-2.04209	0.154981	-0.0700863	0.0642404	-2.02017	0.61594	-1.5191	0.450203	-2.30638	0.622045
(p.Ser.29.Ala)	S	29	A	var	1	0.686083	0.382712	0.102613	0.140775	-0.0173845	0.0105905	0.474846	0.0320002	0.0916152	0.0404128	0.0401387	0.286951	0.471912	0.00831542	0.0587649	0.149767	0.459094	0.0160569
(p.Ser.29.Cys)	S	29	C	var	1	-1.40645	0.41432	0.0794066	0.172827	0.100282	0.102975	-1.36692	0.335166	0.0957651	0.0445815	0.0764245	0.0803805	-1.15329	0.189268	0.0462181	0.0548087	-1.01766	0.827781
(p.Ser.29.Asp)	S	29	D	var	1	0.541024	0.159348	0.29436	0.223177	0.159281	0.308539	0.118375	0.113784	0.0102573	0.0348331	-0.280837	0.033967	0.0972587	0.299194	-0.111608	0.0432747	-0.258553	0.0342559
(p.Ser.29.Glu)	S	29	E	var	1	0.57956	0.104398	0.102803	0.111788	0.0211544	0.0599942	0.169635	0.201684	0.00199519	0.00225452	0.00797716	0.0551804	0.112885	0.105128	-0.0336831	0.11565	0.13901	0.0554887
(p.Ser.29.Phe)	S	29	F	var	1	-0.530016	1.20396	-0.0403767	0.0739641	-0.217481	0.290833	-0.0116737	0.513195	0.0622174	0.488962	0.122181	0.12127	0.182636	0.730822	0.324104	0.522251	0.400145	0.349599
(p.Ser.29.Gly)	S	29	G	var	1	0.682342	0.0648968	0.0497722	0.117661	0.00487815	0.0105861	0.707543	0.162221	0.0843611	0.041266	0.0427247	0.0794081	0.731664	0.0872452	0.0646561	0.0636365	0.606581	0.340644
(p.Ser.29.His)	S	29	H	var	1	0.446553	0.151145	0.373714	0.0765374	0.218337	0.0445123	-0.201667	0.0190497	0.155612	0.321931	0.0139377	0.0527946	-0.310884	0.28372	0.292099	0.145147	-0.191476	0.233807
(p.Ser.29.Ile)	S	29	I	var	1	-0.364628	0.326463	0.212788	0.212515	0.0058369	0.0915369	-0.667317	0.289843	0.114334	0.0425634	-0.251146	0.192128	-0.662552	0.0454506	0.077373	0.181766	-0.383729	0.252161
(p.Ser.29.Lys)	S	29	K	var	1	0.56109	0.248293	0.139419	0.243672	-0.139549	0.159475	0.798646	0.226112	0.198904	0.14578	0.314745	0.255904	0.729701	0.364765	0.317109	0.204566	0.589611	0.313881
(p.Ser.29.Leu)	S	29	L	var	1	0.217617	0.0311944	0.110425	0.0164213	0.0190669	0.0244592	-0.0806421	0.236014	0.0109349	0.0566453	-0.0033929	0.0621566	-0.0800152	0.0695388	0.094712	0.147648	-0.0825228	0.240256
(p.Ser.29.Met)	S	29	M	var	1	0.763741	0.0974617	0.117612	0.345831	0.103367	0.0499061	0.932247	0.198834	0.23439	0.675707	0.280167	0.131701	0.930105	0.372973	0.324107	0.180358	1.0121	0.0136488
(p.Ser.29.Asn)	S	29	N	var	1	0.42581	0.175546	0.00172218	0.226788	0.0251451	0.244198	0.376256	0.193329	0.135979	0.196441	0.156058	0.179959	0.248972	0.201258	0.070328	0.296722	0.0476279	0.0805089
(p.Ser.29.Pro)	S	29	P	var	1	-0.589488	0.698307	-0.116828	0.0724568	0.0713272	0.0123566	-0.0794015	0.267349	0.145289	0.0459782	-0.0583236	0.0344571	0.013859	0.108022	-0.0727841	0.224357	-0.00193825	0.0314542
(p.Ser.29.Gln)	S	29	Q	var	1	0.0217593	0.528859	0.0727305	0.113161	0.0243956	0.0768298	0.320364	0.23271	-0.0844383	0.0506911	-0.0945451	0.0925428	0.11845	0.278749	-0.123983	0.301068	0.111064	0.040062
(p.Ser.29.Arg)	S	29	R	var	1	0.0487641	0.35969	0.0531805	0.0954742	0.0170461	0.0517982	0.208982	0.0628412	-0.0123083	0.0936307	0.0112886	0.13287	0.174655	0.00595378	0.0171585	0.000215916	0.160661	0.201843
(p.29.=)	S	29	S	syn	1	0.528553	0.132041	0.0325257	0.0534595	-0.0210707	0.0854702	0.518918	0.156686	-0.0784211	0.0926828	-0.0260714	0.0366017	0.599784	0.0983797	0.0282871	0.0640033	0.535818	0.310127
(p.Ser.29.Thr)	S	29	T	var	1	0.445637	0.127305	-0.0448022	0.0802227	0.18629	0.124711	0.449666	0.133838	-0.00750728	0.0848111	0.404165	0.240749	0.297634	0.173938	0.0258544	0.241392	0.259068	0.232271
(p.Ser.29.Val)	S	29	V	var	1	0.328274	0.00618622	0.0645156	0.0109133	-0.0617482	0.106431	0.296219	0.132784	0.0452828	0.124709	-0.00479184	0.0643606	0.17446	0.0947101	0.0904166	0.0280966	0.217452	0.122354
(p.Ser.29.Trp)	S	29	W	var	1	-1.41851	0.107701	0.151619	0.309145	0.153338	0.196905	-1.94132	0.0170893	0.189021	0.133347	0.0384914	0.0757713	-1.42739	0.249227	0.146524	0.018704	-1.13597	0.976102
(p.Ser.29.Tyr)	S	29	Y	var	1	0.290155	0.287039	-0.0374901	0.0489453	0.0277567	0.125646	-0.0875278	0.755636	0.292186	0.371624	0.18068	0.20829	0.206686	0.653901	0.299193	0.206518	0.0289402	0.221332
(p.Ser.30.Ter)	S	30	*	var	1	-5.9907	0.985287	-3.90518	0.198568	-0.202756	0.0313659	-6.14592	0.145009	-3.88614	0.477496	-0.44916	0.357828	-2.7454	0.436609	-2.19812	0.719141	-3.24624	0.850442
(p.Ser.30.Ala)	S	30	A	var	1	0.046019	0.00958125	-0.0246671	0.0635533	0.0178347	0.0650509	0.253934	0.154155	0.117893	0.00218034	0.105427	0.0851074	-0.0260206	0.0998406	0.148524	0.0775186	0.0048469	0.237869
(p.Ser.30.Cys)	S	30	C	var	1	-2.32142	0.557346	0.167721	0.06473	0.0869621	0.180955	-2.54684	0.133269	0.105501	0.0946852	0.0442007	0.1589	-2.0876	0.57218	0.194868	0.0399276	-1.71572	1.46054
(p.Ser.30.Asp)	S	30	D	var	1	-0.394227	0.101504	-0.165667	1.48682	0.173377	0.445791	-0.608297	0.120261	-0.364152	0.0303734	-0.348372	0.312971	-0.675384	0.257591	-0.0467507	0.392314	-0.411862	1.32042
(p.Ser.30.Glu)	S	30	E	var	1	-0.659532	0.554406	0.0950218	0.27642	0.0758206	0.0176235	-0.898966	0.401054	0.0658371	0.0987477	0.00599459	0.124621	-0.823937	0.177826	0.0100339	0.107876	-0.610914	0.733132
(p.Ser.30.Phe)	S	30	F	var	1	-0.865936	1.72754	0.215254	0.0243547	-0.522782	1.39812	-0.352502	0.435947	-0.225385	0.228655	-0.640853	0.687612	-1.80187	0.0787064	0.0300219	0.0860643	-0.436111	0.458868
(p.Ser.30.Gly)	S	30	G	var	1	-0.0331458	0.213974	0.0427333	0.133246	-0.0066525	0.0748083	-0.278659	0.212166	0.030523	0.025165	0.0242555	0.00657275	-0.338794	0.20438	0.0833246	0.104804	-0.271916	0.425008
(p.Ser.30.His)	S	30	H	var	1	-0.967303	0.180652	-0.313156	0.233151	0.000214257	0.168714	-1.81383	0.751767	-0.364152	0.617325	-0.131545	0.308179	-1.37788	0.678331	0.0300219	0.337578	-1.01605	1.11571
(p.Ser.30.Ile)	S	30	I	var	1	-1.39281	0.32148	-0.137162	0.100319	-0.206409	0.0863615	-1.56914	0.0947645	-0.107829	0.118761	-0.316102	0.0788667	-1.68931	0.0470763	-0.277091	0.0594786	-0.977088	0.389055
(p.Ser.30.Lys)	S	30	K	var	1	-0.218111	0.43939	0.0932276	0.0656023	0.0682586	0.0598931	-0.657984	0.375041	0.127328	0.0279669	0.150981	0.0997879	-0.590354	0.0962396	0.184451	0.0158544	-0.468953	0.553187
(p.Ser.30.Leu)	S	30	L	var	1	-0.744947	0.692583	0.0479173	0.0515607	0.0944911	0.00486897	-0.604125	0.255531	0.0143474	0.0513647	0.0250904	0.0240405	-0.634464	0.298932	0.0630375	0.0780356	-0.326672	0.370469
(p.Ser.30.Met)	S	30	M	var	1	-0.258458	0.0288462	0.361894	0.0496039	0.182168	0.0281535	-1.00343	0.655194	-0.118558	0.0643739	-0.0156252	0.0479368	-0.855114	0.300449	0.0796232	0.0323053	-0.464511	0.820828
(p.Ser.30.Asn)	S	30	N	var	1	-0.0336119	0.573252	-0.0710115	0.161125	-0.150149	0.351825	-0.352767	0.156675	0.0350265	0.0961902	-0.205143	0.486991	-0.305518	0.121923	-0.0638967	0.323021	-0.281132	0.754656
(p.Ser.30.Pro)	S	30	P	var	1	-0.698219	0.776868	0.0776724	0.0436849	0.0163233	0.0428089	-0.384627	0.309849	0.088315	0.0676883	0.0878409	0.0833323	-0.401384	0.0246198	0.043899	0.0305883	-0.204485	0.487186
(p.Ser.30.Gln)	S	30	Q	var	1	-1.41329	0.862102	0.0411913	0.250707	-0.116696	0.0160894	-1.62872	0.51729	0.0470312	0.0465036	0.101725	0.164952	-1.31274	0.302208	0.232098	0.178877	-0.767175	0.527761
(p.Ser.30.Arg)	S	30	R	var	1	-0.214269	0.321903	0.136678	0.151621	0.0112171	0.139823	-0.358691	0.267709	0.105912	0.0332959	0.096511	0.0708393	-0.345961	0.175189	0.142426	0.113959	-0.229418	0.29963
(p.30.=)	S	30	S	syn	1	0.149507	0.177273	0.158525	0.148404	0.0596763	0.106663	-0.350962	0.0898863	0.0268427	0.0564824	0.0145298	0.0297967	-0.410658	0.138616	0.0241737	0.0879847	-0.27174	0.232462
(p.Ser.30.Thr)	S	30	T	var	1	0.154071	0.0392886	0.0246511	0.109498	-0.0625757	0.10162	0.152671	0.0784247	0.114608	0.0597431	0.219294	0.059414	0.0184723	0.094482	0.114685	0.108108	0.0391894	0.0601928
(p.Ser.30.Val)	S	30	V	var	1	0.245261	0.215917	-0.238192	1.38425	0.477218	1.43031	-0.141854	0.874825	0.162082	0.713833	-1.06485	0.126977	-0.697928	0.366474	0.313195	0.000107	-0.576936	0.641751
(p.Ser.30.Trp)	S	30	W	var	1	-0.197454	0.363282	0.12754	0.148038	0.0352991	0.123642	-0.392107	0.105868	0.0233931	0.0521133	-0.0225815	0.159039	-0.313323	0.00382066	0.102026	0.0232262	-0.122626	0.133689
(p.Ser.30.Tyr)	S	30	Y	var	1	0.415004	1.01572	0.492434	0.130128	0.44663	0.417287	-0.0293508	0.315592	-0.502244	0.0427869	-0.353923	0.018752	-0.0843914	0.38825	-0.337038	0.0355222	-0.123791	0.08068
(p.Gly.31.Ter)	G	31	*	var	1	-3.67064	0.0542139	-3.10819	0.136812	-0.253516	0.150877	-3.64608	0.149555	-3.1802	0.221783	-0.28698	0.23833	-2.16782	0.535324	-1.87601	0.458289	-2.55154	0.692873
(p.Gly.31.Ala)	G	31	A	var	1	-0.091924	0.295181	-0.0197427	0.137971	0.0370096	0.0366913	0.105467	0.00254364	-0.0758633	0.0917203	0.0152488	0.0527522	0.0344772	0.0273859	0.0386074	0.0271136	-0.0833134	0.0634349
(p.Gly.31.Cys)	G	31	C	var	1	-2.06081	0.640568	0.0597412	0.221564	-0.36311	0.116961	-2.71012	0.23448	0.263513	0.155351	-0.0126753	0.0306442	-1.98389	0.617409	0.155641	0.111301	-2.10585	1.73897
(p.Gly.31.Asp)	G	31	D	var	1	-0.834278	1.00489	0.0840201	0.019605	-0.0310261	0.187316	-0.4687	0.644365	0.232705	0.030426	0.0714906	0.0726977	-0.69197	0.423397	0.0224724	0.0431681	-0.309077	0.571179
(p.Gly.31.Glu)	G	31	E	var	1	-0.224745	0.209225	0.0106537	0.00832099	-0.00553774	0.0593465	-0.543212	0.330015	0.023825	0.0532011	0.0462201	0.00362268	-0.597667	0.136277	0.0260545	0.161962	-0.550336	0.538413
(p.Gly.31.Phe)	G	31	F	var	1	0.683832	1.40532	-0.16219	0.509431	-0.522782	0.298416	0.387593	0.440584	0.512302	0.128094	0.116433	1.03086	0.437396	0.521738	0.117037	0.623945	0.611599	0.265524
(p.31.=)	G	31	G	syn	1	0.340896	0.0479284	0.139544	0.117165	-0.0229115	0.0221229	0.0866196	0.067332	-0.000279431	0.085624	-0.00607945	0.0081943	-0.0624725	0.0904075	-0.0248814	0.0964236	-0.0780643	0.162204
(p.Gly.31.His)	G	31	H	var	1	0.429989	0.587474	0.00427505	1.0872	-0.0455726	0.346008	-0.183085	1.34256	0.30981	0.251151	-0.0984088	0.821941	0.493939	0.525063	-0.387074	0.377926	-0.243886	0.433136
(p.Gly.31.Ile)	G	31	I	var	1	-1.58276	0.326057	-0.229937	0.253967	-0.70441	0.753517	-1.18665	0.0606354	-0.176954	0.0862997	0.3027	0.0208319	-1.75999	0.278707	0.217094	0.023049	-1.03208	0.678987
(p.Gly.31.Lys)	G	31	K	var	1	-1.4246	1.33254	0.0993096	0.170296	-0.000948963	0.193235	-0.811664	0.228252	0.441565	0.127603	0.151764	0.0674132	-0.725152	0.0134628	0.0394828	0.0441486	-0.380204	0.14544
(p.Gly.31.Leu)	G	31	L	var	1	-0.058666	0.124755	0.327047	0.402996	0.0599058	0.192463	-0.229148	0.12185	0.274518	0.30106	0.011758	0.00858557	-0.362904	0.0881182	0.220745	0.0759355	-0.441704	0.220854
(p.Gly.31.Met)	G	31	M	var	1	-2.23981	0.775161	-0.666173	0.463665	-1.2005	0.602996	-1.75413	0.436818	0.0822793	0.386011	0.189945	0.124795	-1.47117	0.0842056	-0.0915661	0.144638	-0.971281	0.569789
(p.Gly.31.Asn)	G	31	N	var	1	-0.234418	3.07591	-0.0772277	0.197675	-0.648551	1.67553
(p.Gly.31.Pro)	G	31	P	var	1	-0.714801	1.20997	0.342338	0.0243157	0.19229	0.236209	-0.771253	0.289807	-0.251386	0.339626	0.344862	0.00282962	-0.812669	0.181901	0.198454	0.424576	-0.0371637	0.420714
(p.Gly.31.Gln)	G	31	Q	var	1	-0.239057	0.573214	0.205946	0.283633	-0.373002	0.227915	-0.0573802	0.251697	-0.595519	0.229376	-0.415952	0.0971118	-0.50149	0.198981	-0.63689	0.547336	-0.476467	0.175103
(p.Gly.31.Arg)	G	31	R	var	1	-0.705031	0.408424	0.0854548	0.0934181	0.0141282	0.0687734	-0.687771	0.263841	0.0269722	0.192996	0.0164487	0.130436	-0.708454	0.299145	0.0694851	0.190621	-0.52549	0.576136
(p.Gly.31.Ser)	G	31	S	var	1	-0.394227	0.252705	0.165611	0.160415	0.0452487	0.0721704	-0.675859	0.149632	-0.00630014	0.297797	0.117407	0.147224	-0.687657	0.175737	-0.0272985	0.392702	-0.441752	0.351796
(p.Gly.31.Thr)	G	31	T	var	1	-1.55321	1.15066	0.145627	0.432026	0.0153401	0.167108	-0.884775	0.238818	-0.152499	0.268948	-0.151176	0.213574	-0.926953	0.078067	-0.222328	0.362453	-0.772643	0.704271
(p.Gly.31.Val)	G	31	V	var	1	-0.235162	0.119903	-0.0211068	0.00115668	-0.14494	0.230161	-0.280421	0.0907892	-0.157126	0.0705171	-0.00147792	0.186888	-0.430755	0.0276126	0.00864874	0.00911795	-0.291607	0.28649
(p.Gly.31.Trp)	G	31	W	var	1	-0.12052	0.240554	0.288143	0.0854515	0.0637682	0.0387917	-0.370269	0.308784	0.0174191	0.101022	0.10136	0.223269	-0.302903	0.318787	0.020603	0.319394	-0.298695	0.344456
(p.Gly.31.Tyr)	G	31	Y	var	1	0.126094	0.67641	0.0347769	0.124032	-0.226912	0.0213124	0.539604	0.447768	0.466105	0.309225	0.506012	0.518902	0.385482	0.127865	0.185392	0.0761961	0.320196	0.237039
(p.Glu.32.Ter)	E	32	*	var	1	-5.63474	0.3803	-4.24522	0.227225	-0.233403	0.196305	-5.84937	0.138995	-4.47725	0.0604631	-0.65641	0.647984	-2.60026	0.609018	-2.14503	0.683677	-3.03868	0.988586
(p.Glu.32.Ala)	E	32	A	var	1	-0.620608	0.478482	0.0956072	0.0665588	0.0523166	0.0498835	-0.337615	0.2509	0.0240283	0.0807394	0.00963327	0.0145406	-0.49666	0.19166	0.13217	0.190691	-0.272646	0.279698
(p.Glu.32.Cys)	E	32	C	var	1	-2.81334	0.571238	0.242747	0.0166233	0.146066	0.221004	-2.31064	0.300683	0.0506828	0.302689	-0.0133154	0.126196	-1.59643	0.314214	0.175547	0.106661	-1.52123	0.973605
(p.Glu.32.Asp)	E	32	D	var	1	-0.2241	0.302401	0.221256	0.192614	0.0969509	0.0075312	-0.355109	0.21343	0.0153352	0.185639	-0.0245735	0.0269813	-0.418398	0.271834	0.0919543	0.146845	-0.309719	0.505936
(p.32.=)	E	32	E	syn	1	-0.124101	0.133666	0.0845907	0.00700694	0.067874	0.0115841	-0.137587	0.177611	0.0597637	0.0377701	0.0461827	0.0873463	-0.320375	0.126899	-0.00735227	0.111646	-0.224568	0.421881
(p.Glu.32.Phe)	E	32	F	var	1	-0.975493	0.692849	0.182776	0.170025	0.0823071	0.318856	-0.977799	0.284615	0.156969	0.190013	0.113029	0.124584	-0.779908	0.343292	0.25523	0.0246055	-0.681479	0.516257
(p.Glu.32.Gly)	E	32	G	var	1	0.169394	0.0656159	0.0531256	0.102922	-0.00308744	0.0460129	0.0567767	0.15401	0.001738	0.0257128	-0.00471406	0.0200131	-0.117995	0.128322	0.0147737	0.137831	-0.179947	0.288414
(p.Glu.32.His)	E	32	H	var	1	-0.948786	0.0916823	-0.0502389	0.0349519	-0.00440281	0.717005	-1.00225	0.0530067	-0.0770731	0.109368	0.209181	0.0631384	-1.00686	0.285309	0.129414	0.0241205	-0.861866	0.931391
(p.Glu.32.Ile)	E	32	I	var	1	-0.379689	0.0391073	0.0325528	0.00075974	0.0195452	0.0149417	-0.566599	0.0317927	-0.135061	0.290358	-0.0298036	0.21597	-0.60469	0.0955014	-0.0165416	0.121825	-0.395643	0.137439
(p.Glu.32.Lys)	E	32	K	var	1	0.418401	0.168596	0.00592538	0.0378359	0.0600241	0.0488718	0.217356	0.426233	0.109921	0.223957	0.014959	0.31674	0.0845018	0.192964	0.197287	0.272171	0.0764237	0.11255
(p.Glu.32.Leu)	E	32	L	var	1	-0.657769	0.0886924	0.108939	0.0107054	0.0656505	0.0934658	-1.10129	0.362177	0.0490949	0.149928	0.0824077	0.167445	-1.04527	0.135696	0.11293	0.0865456	-0.79491	0.723328
(p.Glu.32.Met)	E	32	M	var	1	-0.666388	0.36341	0.0136858	0.00534036	-0.0756079	0.0215216	-0.607473	0.270959	-0.0760964	0.176926	0.0853762	0.130628	-0.533741	0.179121	0.180455	0.105616	-0.507716	0.544377
(p.Glu.32.Asn)	E	32	N	var	1	-0.145168	0.0875442	0.148716	0.0988025	0.234451	0.0785411	-0.403955	0.467395	0.0952189	0.0884385	-0.108482	0.101859	-0.659617	0.0719839	-0.0436526	0.0821855	-0.398092	0.644986
(p.Glu.32.Pro)	E	32	P	var	1	-0.561281	0.311981	-0.167648	0.0650512	-0.206334	0.0516032	-0.64785	0.227482	-0.014644	0.0242424	-0.176257	0.0220337	-0.61151	0.248377	0.0887929	0.012157	-0.527407	0.320017
(p.Glu.32.Gln)	E	32	Q	var	1	-0.528629	0.524319	-0.0952273	0.104952	0.0487097	0.00847404	-0.22494	0.128302	0.0115085	0.128904	0.172346	0.0188434	-0.338332	0.13037	0.105204	0.0356425	-0.186967	0.263271
(p.Glu.32.Arg)	E	32	R	var	1	0.059865	0.0247294	0.00273588	0.0384798	-0.023128	0.0335483	0.0767084	0.0703423	0.00974271	0.075716	0.040512	0.0510475	-0.100551	0.00906191	0.112822	0.0724647	0.0361733	0.146664
(p.Glu.32.Ser)	E	32	S	var	1	-0.529504	0.3051	0.0213422	0.042915	0.0111917	0.141663	-0.382349	0.242747	0.108156	0.132171	0.0588484	0.02904	-0.436662	0.065719	0.103243	0.0258586	-0.378412	0.348458
(p.Glu.32.Thr)	E	32	T	var	1	-1.08403	0.855235	0.0564124	0.031931	-0.058962	0.130345	-0.797108	0.323517	0.0844581	0.0744024	0.0423024	0.139008	-0.678632	0.0672424	0.0816739	0.081413	-0.555174	0.495089
(p.Glu.32.Val)	E	32	V	var	1	-0.169248	0.105566	0.16106	0.0849094	0.0074971	0.00763037	-0.403409	0.287448	-0.0626503	0.00918268	0.0179832	0.0554111	-0.468386	0.146954	-0.0548736	0.0585846	-0.374307	0.371005
(p.Glu.32.Trp)	E	32	W	var	1	-0.495129	0.325142	0.104221	0.173818	0.0530794	0.0112783	-0.642014	0.27967	-0.0292071	0.0591426	0.0191738	0.120249	-0.609209	0.139994	0.0876091	0.0177007	-0.459153	0.441605
(p.Glu.32.Tyr)	E	32	Y	var	1	-1.30337	0.964567	0.235102	0.30578	0.296967	0.0723378	-1.32844	0.233448	-0.0314975	0.245612	-0.221157	0.382567	-1.22448	0.436682	-0.177578	0.220144	-1.01417	0.98591
(p.Tyr.33.Ter)	Y	33	*	var	1	-3.72305	0.093477	-3.50512	0.196663	0.00679691	0.26213	-4.84916	0.0226983	-3.442	0.289223	-0.545567	0.595276	-2.4833	0.666967	-2.19733	0.859986	-3.08948	1.17479
(p.Tyr.33.Ala)	Y	33	A	var	1	0.674322	0.124414	0.100205	0.0756923	0.101187	0.0328396	-1.85134	1.10311	0.00200651	0.0202319	0.107148	0.0754396	-0.762269	1.14815	0.143376	0.0596408	-1.30022	1.77792
(p.Tyr.33.Cys)	Y	33	C	var	1	-2.14834	0.642867	0.187939	0.27675	0.144057	0.170749	-3.06997	0.24109	0.0401038	0.105166	0.0318299	0.0407824	-1.84886	0.469942	0.0832398	0.0385097	-1.99955	1.21004
(p.Tyr.33.Asp)	Y	33	D	var	1	0.177532	0.335099	0.0845388	0.144846	0.00353171	0.119217	-2.53725	0.883481	0.0586196	0.100517	-0.0401955	0.100735	-1.61922	1.07629	0.161723	0.255051	-1.70775	2.08183
(p.Tyr.33.Glu)	Y	33	E	var	1	0.803464	0.272329	0.177542	0.0323256	0.0471653	0.0751777	-1.85026	0.993378	0.112137	0.126499	0.0837813	0.154221	-0.539019	1.16053	0.113824	0.230421	-1.18433	1.75489
(p.Tyr.33.Phe)	Y	33	F	var	1	0.675559	0.374798	-0.224404	0.241685	-0.0631204	0.0203431	0.606962	0.112565	-0.16097	0.232823	-0.0881425	0.264953	0.690025	0.264788	-0.109443	0.229668	0.477961	0.3474
(p.Tyr.33.Gly)	Y	33	G	var	1	0.795181	0.209823	0.0729214	0.047623	0.0328356	0.0487427	-1.82648	1.01989	0.0371128	0.049803	0.0298355	0.109871	-0.66359	1.12018	0.0827609	0.0755643	-1.21526	1.65889
(p.Tyr.33.His)	Y	33	H	var	1	0.166859	0.0932017	0.0755418	0.0663821	0.216794	0.155658	-1.31077	0.710687	0.121087	0.115027	0.136622	0.402485	-0.650101	0.683615	0.202505	0.0742759	-0.636577	1.20297
(p.Tyr.33.Ile)	Y	33	I	var	1	0.791339	0.0201611	0.110327	0.140097	0.00395093	0.123731	-1.22663	1.4077	0.266594	0.0951212	0.136291	0.130837	-0.0884796	0.618767	0.194121	0.0424173	-0.949152	1.71398
(p.Tyr.33.Lys)	Y	33	K	var	1	0.601701	0.262023	0.260347	0.0647626	0.0757928	0.133155	-1.64557	1.55769	-0.0539707	0.242728	0.0996519	0.191061	-0.115907	0.930286	0.13547	0.146294	-1.15692	1.71947
(p.Tyr.33.Leu)	Y	33	L	var	1	0.726336	0.218282	0.112254	0.073414	-0.0270629	0.150142	-1.21729	1.44486	0.0342548	0.0483022	0.0442989	0.0826372	-0.10156	0.657672	0.0263104	0.0737202	-0.86446	1.29591
(p.Tyr.33.Met)	Y	33	M	var	1	0.794876	0.265201	0.127227	0.0842245	-0.138721	0.128329	-0.373164	1.52926	0.121661	0.00961121	0.20097	0.0247702	0.685379	0.513601	0.189111	0.219827	-0.225025	1.0846
(p.Tyr.33.Asn)	Y	33	N	var	1	0.142935	0.185106	-0.253776	0.0636731	-0.021647	0.153983	-2.54876	0.270837	-0.154942	0.28215	-0.0818767	0.127935	-1.37164	0.636067	-0.155171	0.241044	-1.58335	1.03397
(p.Tyr.33.Pro)	Y	33	P	var	1	0.759367	0.224313	6.85081e-06	0.00609798	0.131537	0.00889032	-1.71155	0.864536	0.119848	0.265395	0.0727927	0.17584	-0.429947	0.886794	0.132269	0.0951753	-0.807675	1.30283
(p.Tyr.33.Gln)	Y	33	Q	var	1	1.01478	0.59646	0.163555	0.153901	0.0431694	0.178121	-1.56426	1.26153	-0.0962905	0.212521	-0.0177285	0.0780144	-0.310675	1.06253	0.085289	0.197972	-1.05363	1.76185
(p.Tyr.33.Arg)	Y	33	R	var	1	0.749833	0.144805	0.131807	0.0212095	0.0511267	0.0860559	-1.46159	1.17271	0.0230185	0.0376751	0.0604142	0.0144712	-0.267228	0.946174	0.115911	0.108407	-0.959567	1.34788
(p.Tyr.33.Ser)	Y	33	S	var	1	0.561634	0.0935459	0.045106	0.0591781	-0.00553614	0.101684	-2.10264	0.796516	0.138179	0.0794911	0.0673415	0.143987	-0.923896	0.975076	0.325883	0.0925015	-1.28668	1.70874
(p.Tyr.33.Thr)	Y	33	T	var	1	0.621189	0.0394441	0.0138631	0.0841748	0.0496699	0.0910734	-2.03974	1.03066	0.216797	0.112026	0.131369	0.0460105	-0.55767	1.0301	0.156738	0.0300119	-1.23037	1.70649
(p.Tyr.33.Val)	Y	33	V	var	1	0.690877	0.147865	0.0508813	0.108805	0.0295977	0.0185092	-1.27395	1.30806	0.0495019	0.148781	0.0357707	0.0456671	-0.0675931	0.785113	0.114862	0.0380987	-0.899642	1.44821
(p.Tyr.33.Trp)	Y	33	W	var	1	0.910438	0.205443	0.0849945	0.111663	0.0537136	0.0170336	0.796931	0.186543	0.00634339	0.0583244	0.0175083	0.0237257	1.07188	0.172669	-0.0473267	0.0849647	1.46686	1.12742
(p.33.=)	Y	33	Y	syn	1	-0.0816796	0.303923	-0.325978	0.253655	-0.0788868	0.000571124	-0.215225	0.275017	-0.255798	0.259891	-0.17423	0.235372	0.0513732	0.208264	0.170003	0.460621	-0.284678	0.916742
(p.Pro.34.Ter)	P	34	*	var	1	-4.93295	1.09552	-3.65756	0.261193	-0.100548	0.150232	-6.70927	0.478612	-3.52856	0.185519	-0.301648	0.311522	-2.75188	0.890227	-2.00629	0.645907	-3.34323	1.05764
(p.Pro.34.Ala)	P	34	A	var	1	0.552375	0.00365331	0.0463465	0.00730462	0.0472917	0.00370214	-1.66809	1.47418	-0.0308867	0.0401964	0.0102943	0.146152	-0.19124	0.641077	0.0265346	0.0921941	-1.21859	1.54458
(p.Pro.34.Cys)	P	34	C	var	1	-3.65892	0.696077	0.29074	0.0668834	0.121474	0.280994	-4.77525	0.173531	0.0848896	0.128953	0.129676	0.188783	-2.05622	0.641179	0.309623	0.182935	-2.70102	1.49283
(p.Pro.34.Asp)	P	34	D	var	1	0.688274	0.245163	0.155081	0.0577221	-0.0960782	0.195609	-2.34457	0.979657	0.0823426	0.0621224	-0.0925366	0.412907	-0.951282	0.500215	0.0714132	0.110816	-1.83883	2.0699
(p.Pro.34.Glu)	P	34	E	var	1	0.575693	0.219173	0.142626	0.16117	0.0405017	0.0191952	-2.27963	0.798869	-0.0176622	0.146774	-0.00563035	0.162318	-1.17455	1.18512	0.0844671	0.0569513	-1.4675	1.53882
(p.Pro.34.Phe)	P	34	F	var	1	-0.51256	1.14536	0.130758	0.0365367	0.0914777	0.167614	-1.68309	1.1208	-0.133225	0.228703	-0.151786	0.306103	-0.447407	0.123481	0.0179204	0.146726	-1.29166	1.25168
(p.Pro.34.Gly)	P	34	G	var	1	0.453323	0.14651	0.101837	0.118115	0.0455319	0.0834274	-2.2484	1.03607	0.0688807	0.0839822	0.0702185	0.0980439	-1.03367	1.03113	0.0862646	0.0424276	-1.54908	1.76956
(p.Pro.34.His)	P	34	H	var	1	0.418217	0.319749	-0.0116055	0.0180381	0.0621804	0.0160943	-2.60267	1.12198	0.207506	0.121291	0.137026	0.0690507	-0.887363	0.988342	0.348339	0.0449206	-1.43132	1.77392
(p.Pro.34.Ile)	P	34	I	var	1	0.160759	0.208674	0.246794	0.236126	0.0901342	0.430133	-1.66373	1.17171	-0.119574	0.2052	-0.13795	0.21671	-0.847774	1.04872	-0.0120125	0.459806	-1.91707	1.73579
(p.Pro.34.Lys)	P	34	K	var	1	0.285066	0.415807	0.250906	0.202612	0.0135683	0.0260698	-2.64549	0.624642	-0.117111	0.0856681	-0.0129706	0.251436	-1.33407	1.31777	-0.0184759	0.222087	-1.78161	1.80977
(p.Pro.34.Leu)	P	34	L	var	1	0.50179	0.0363894	0.19258	0.0400729	0.103776	0.223334	-1.79298	1.06394	-0.029483	0.0037323	-0.0409247	0.086715	-0.831658	0.888919	-0.0134049	0.0931397	-1.52321	1.74296
(p.Pro.34.Met)	P	34	M	var	1	0.604611	0.158639	0.0820998	0.0429307	0.0638508	0.0835773	-1.97753	0.972641	-0.0342531	0.0806581	-0.0202554	0.116572	-0.632696	0.977282	-0.022481	0.135444	-1.71992	1.50572
(p.Pro.34.Asn)	P	34	N	var	1	0.756027	0.260999	0.21221	0.0405558	0.214487	0.0370292	-3.17633	1.17669	-0.141453	0.124225	0.150194	0.764948	-1.52489	0.721501	0.169396	0.548432	-1.83217	1.75851
(p.34.=)	P	34	P	syn	1	0.657487	1.01469	-0.183691	0.111949	0.260455	0.0415108	0.263079	0.422002	0.201662	0.311218	0.29478	0.230678	0.216826	0.531376	0.178749	0.294484	0.444635	0.603752
(p.Pro.34.Gln)	P	34	Q	var	1	0.697077	0.266528	0.224514	0.132364	0.255048	0.070367	-1.73981	0.98812	0.0961215	0.0767124	0.134164	0.0916902	-0.792737	0.709032	0.182536	0.0159585	-1.24194	1.59973
(p.Pro.34.Arg)	P	34	R	var	1	0.30453	0.274992	0.116333	0.0459046	-0.0386277	0.076063	-2.57029	0.872677	0.0539682	0.0680088	0.0600178	0.0721651	-1.37509	0.982655	0.106969	0.0375721	-1.6775	1.67542
(p.Pro.34.Ser)	P	34	S	var	1	0.402111	0.0685818	0.117937	0.0717303	0.0126288	0.164146	-1.79567	0.831303	-0.0514152	0.207705	-0.0624796	0.208513	-0.52356	0.641891	0.159215	0.222973	-1.25234	1.36237
(p.Pro.34.Thr)	P	34	T	var	1	0.346735	0.261184	-0.0489463	0.019848	-0.0409739	0.112811	-1.87717	0.748506	-0.0870627	0.0365466	-0.151471	0.163167	-0.84375	0.711302	0.1639	0.0423147	-1.54037	1.8653
(p.Pro.34.Val)	P	34	V	var	1	0.375373	0.275867	0.117904	0.0847458	0.0503939	0.0168853	-1.70648	1.41151	0.0579654	0.0481173	-0.0209192	0.00849327	-0.467584	0.840085	0.111821	0.0407263	-1.45808	1.68175
(p.Pro.34.Trp)	P	34	W	var	1	0.393015	0.0480676	0.10219	0.0487179	0.0480004	0.0560532	-0.940301	1.07196	-0.0100733	0.0776396	0.0606514	0.216148	0.0698711	0.261629	0.0737744	0.00461804	-0.805496	0.950515
(p.Pro.34.Tyr)	P	34	Y	var	1	-0.105073	0.338103	0.000895751	0.128763	0.0364324	0.349999	-1.42719	1.28895	0.114974	0.0923923	-0.139101	0.071491	-0.323515	0.507214	0.0835548	0.131611	-0.912688	1.13367
(p.Thr.35.Ter)	T	35	*	var	1	-4.46273	0.643003	-3.09442	0.334327	-0.205138	0.0977266	-4.59208	0.418933	-3.48619	0.431812	-0.532503	0.302761	-2.48785	0.724839	-2.03208	0.582194	-3.02184	0.956311
(p.Thr.35.Ala)	T	35	A	var	1	0.369212	0.056992	0.0144102	0.0987612	-0.0330948	0.00990119	0.445827	0.110491	-0.054716	0.0028996	-0.0743619	0.0368167	0.37563	0.153259	-0.048782	0.0573995	0.196049	0.256578
(p.Thr.35.Cys)	T	35	C	var	1	-2.12772	1.55794	0.184838	0.0523837	0.202128	0.180285	-2.30503	0.733609	-0.0982141	0.110453	-0.13938	0.162344	-1.42515	0.802929	-0.0370499	0.506518	-1.62184	1.74324
(p.Thr.35.Asp)	T	35	D	var	1	0.438443	0.0445595	0.121643	0.0877432	-0.10582	0.157397	0.704273	0.352461	0.0690601	0.254761	0.141514	0.257857	0.498871	0.17512	0.16643	0.170635	0.413716	0.147835
(p.Thr.35.Glu)	T	35	E	var	1	0.599456	0.0608038	0.167496	0.0212991	0.0437861	0.0452326	0.665738	0.169398	0.0894229	0.113236	0.0405631	0.0953829	0.603396	0.0628953	0.105579	0.0356828	0.500563	0.342878
(p.Thr.35.Phe)	T	35	F	var	1	-0.670587	1.02547	-0.0128326	0.2095	-0.185657	0.0907955	-0.237211	0.691388	-0.0820816	1.14882	0.195037	0.406946	-0.305848	0.530618	0.111	0.300898	-0.491247	0.882502
(p.Thr.35.Gly)	T	35	G	var	1	-0.581014	0.372013	0.016174	0.0557963	-0.0181055	0.0121327	-0.433473	0.213769	0.00244676	0.0163368	-0.00692359	0.109745	-0.430649	0.0753182	0.0714303	0.124417	0.00231441	0.147774
(p.Thr.35.His)	T	35	H	var	1	-0.816812	1.13607	0.239715	0.268159	-0.152885	0.0303797	0.013925	0.379993	-0.0789941	0.372901	-0.0347851	1.02008	0.163767	0.392754	0.458084	0.056019	-0.41934	0.185007
(p.Thr.35.Ile)	T	35	I	var	1	0.519415	0.436236	-0.0983031	0.256509	-0.0356643	0.313519	0.685093	0.186841	0.0155399	0.263355	0.0692028	0.332437	0.520605	0.271787	-0.0202704	0.146403	0.206814	0.100191
(p.Thr.35.Lys)	T	35	K	var	1	0.263474	0.0250603	0.135862	0.00949564	-0.0538674	0.0263992	0.287113	0.0284126	0.0334871	0.0560006	0.0435014	0.0716735	0.153436	0.0188533	0.100404	0.0134708	0.0885061	0.0839271
(p.Thr.35.Leu)	T	35	L	var	1	-0.514976	0.444367	-0.0356006	0.0994237	-0.0635663	0.0948381	-0.311883	0.0773556	0.0747845	0.109437	-0.0785399	0.107619	-0.413231	0.0120605	0.0453473	0.0459214	-0.493246	0.344182
(p.Thr.35.Met)	T	35	M	var	1	0.464179	0.0369081	0.225066	0.223411	0.1608	0.073236	0.115877	0.0600936	0.00745922	0.0454258	0.0143561	0.332329	0.101535	0.149725	-0.0877074	0.0182545	-0.310359	0.160126
(p.Thr.35.Asn)	T	35	N	var	1	0.828586	0.118687	0.0304431	0.270547	0.163827	0.127713	0.753027	0.274845	-0.127128	0.0285207	-0.123371	0.209737	0.486105	0.107771	0.246502	0.120539	0.46931	0.491128
(p.Thr.35.Pro)	T	35	P	var	1	0.552639	0.145966	0.062068	0.137511	0.116411	0.12347	0.291935	0.459748	-0.128676	0.159404	-0.228767	0.282045	0.269189	0.25383	-0.194584	0.0634097	0.0787155	0.308825
(p.Thr.35.Gln)	T	35	Q	var	1	-0.00338006	0.408282	0.00739945	0.204761	-0.0219463	0.0663792	0.159646	0.287924	-0.0283514	0.0880208	0.0261281	0.123045	-0.153013	0.25316	0.0449337	0.132239	0.00170851	0.317154
(p.Thr.35.Arg)	T	35	R	var	1	0.0570227	0.269299	0.0218361	0.113594	-0.00179295	0.116432	0.240403	0.0879809	0.0214282	0.117647	-0.0179374	0.0552817	0.0613688	0.0703101	0.0171807	0.163074	-0.0407845	0.207721
(p.Thr.35.Ser)	T	35	S	var	1	-0.143731	0.435584	-0.0743066	0.0792588	0.0224338	0.137412	0.192837	0.0721463	-0.197597	0.238693	-0.0402209	0.0392886	0.18293	0.0940904	-0.0445584	0.285744	0.14732	0.122904
(p.35.=)	T	35	T	syn	1	0.427379	0.249453	0.244707	0.363389	0.102525	0.382681	-0.107717	0.120598	-0.101002	0.180743	-0.15922	0.139043	-0.31398	0.193005	-0.0577165	0.173918	-0.238915	0.0761752
(p.Thr.35.Val)	T	35	V	var	1	0.288577	0.109814	0.0705695	0.0266091	-0.00916012	0.0452047	0.420886	0.177349	0.123622	0.0377011	0.0585626	0.0262191	0.245657	0.104985	0.0929064	0.174865	-0.0835284	0.324578
(p.Thr.35.Trp)	T	35	W	var	1	0.625243	0.0368971	0.0249989	0.143113	0.0436733	0.035244	0.490836	0.0183459	-0.0427935	0.0380371	-0.0871393	0.0571777	0.565519	0.0703101	-0.0464346	0.138559	0.366356	0.217233
(p.Thr.35.Tyr)	T	35	Y	var	1	-0.450412	1.43543	0.0939045	0.475472	-0.0365224	0.23583	0.0120133	0.428473	0.0249943	0.607036	0.22662	0.34899	0.3154	0.191797	0.104368	0.0891697	0.551364	0.27368
(p.Val.36.Ter)	V	36	*	var	1	-5.43116	0.235031	-2.18571	0.0222579	-0.109219	0.0596127	-5.72279	0.112707	-2.58949	0.219513	-0.319612	0.37086	-2.77844	0.510281	-2.08571	0.630077	-3.26924	1.03503
(p.Val.36.Ala)	V	36	A	var	1	0.754407	0.197079	0.0490747	0.0302137	0.0203968	0.0748045	0.789339	0.231017	-0.037296	0.0880968	0.000977705	0.0607554	0.857517	0.0332356	0.0145742	0.133178	1.02498	0.780671
(p.Val.36.Cys)	V	36	C	var	1	-1.39069	0.665113	0.0748671	0.0364957	-0.050627	0.0116849	-1.60928	0.696505	0.069961	0.0934613	0.0189606	0.130124	-1.26507	0.568072	0.0373303	0.127804	-1.35706	1.15752
(p.Val.36.Asp)	V	36	D	var	1	0.785447	0.123844	0.12916	0.0412228	0.0753022	0.00552281	0.751344	0.0821143	0.0947156	0.0607292	-0.000485129	0.00849103	0.778021	0.0250206	0.0900284	0.109996	0.485197	0.221831
(p.Val.36.Glu)	V	36	E	var	1	0.751148	0.199824	-0.0277	0.00097551	-0.0607106	0.034229	0.799297	0.22915	-0.0242169	0.139721	-0.0297051	0.0601375	0.996703	0.0341687	0.0910097	0.130296	1.0487	0.596043
(p.Val.36.Phe)	V	36	F	var	1	0.590631	0.112943	0.0500087	0.00326199	0.0398973	0.122802	0.773661	0.379306	0.0142835	0.180078	-0.0567459	0.0878109	0.794755	0.153263	0.00101255	0.0150285	0.713949	0.558452
(p.Val.36.Gly)	V	36	G	var	1	0.697967	0.127844	0.0615494	0.0345378	0.00039494	0.0581343	0.700544	0.167528	-0.085577	0.0423543	-0.0789581	0.011193	0.775947	0.0271039	-0.0383293	0.131935	0.845966	0.663589
(p.Val.36.His)	V	36	H	var	1	0.62204	0.214302	-0.0590597	0.213652	0.209284	0.0500473	0.612924	0.273034	-0.295446	0.426197	-0.178672	0.223483	0.681491	0.0149027	-0.0970232	0.046135	0.390146	0.500667
(p.Val.36.Ile)	V	36	I	var	1	0.50183	0.0109916	0.00936328	0.0135045	-0.0116762	0.113779	0.532112	0.1103	-0.0212433	0.0454109	-0.00115652	0.0722551	0.562802	0.0499428	-0.0729948	0.104196	0.236355	0.264873
(p.Val.36.Lys)	V	36	K	var	1	0.174685	0.3011	0.0720725	0.0534334	0.155403	0.00972998	0.334439	0.103738	-0.0169598	0.00730043	-0.0130517	0.159831	0.234895	0.137878	0.114763	0.0248487	-0.14837	0.3133
(p.Val.36.Leu)	V	36	L	var	1	0.487922	0.0197358	0.0548063	0.0750688	-0.00580798	0.0757086	0.664312	0.0909086	-0.00749534	0.0105387	0.00370534	0.0159945	0.758631	0.027893	0.0131241	0.123144	0.483898	0.226714
(p.Val.36.Met)	V	36	M	var	1	0.4912	0.195317	0.123376	0.173508	-0.0127104	0.132705	0.626161	0.0181735	0.092035	0.0934196	0.059108	0.0299948	0.71828	0.0610746	0.029438	0.118807	0.429084	0.0467258
(p.Val.36.Asn)	V	36	N	var	1	0.728395	0.032292	-0.00556403	0.0366079	-0.0962343	0.0700288	0.55724	0.178846	-0.0424221	0.141356	-0.204817	0.0925541	0.535	0.080019	-0.0427384	0.0515984	0.157565	0.0169865
(p.Val.36.Pro)	V	36	P	var	1	0.717871	0.182445	0.00616253	0.0157253	-0.0341443	0.135168	0.744514	0.215686	-0.0399878	0.00983559	-0.0752303	0.148555	0.725619	0.053802	0.0047795	0.0165562	0.743623	0.526589
(p.Val.36.Gln)	V	36	Q	var	1	0.766679	0.0530313	0.175999	0.0769735	0.150911	0.055132	0.763105	0.205019	0.0580453	0.183525	0.0961135	0.16936	0.805717	0.10433	0.147789	0.0135799	0.63324	0.541569
(p.Val.36.Arg)	V	36	R	var	1	-0.396275	0.304327	0.0295964	0.0804958	0.0224517	0.0574157	-0.560163	0.37314	0.0340994	0.0382471	0.014222	0.0957127	-0.550041	0.187862	0.0293684	0.0625895	-0.506151	0.498343
(p.Val.36.Ser)	V	36	S	var	1	0.648356	0.0174347	0.0853941	0.0783047	0.000956275	0.0486683	0.691349	0.205124	-0.0116548	0.035718	0.0205611	0.00526981	0.698925	0.00165783	0.014553	0.117333	0.662441	0.615214
(p.Val.36.Thr)	V	36	T	var	1	0.299646	0.192001	0.0389389	0.111212	0.0519223	0.000658602	0.427768	0.0653749	0.0254905	0.0310756	0.00363296	0.108336	0.333594	0.150236	0.102337	0.153444	0.303746	0.0753264
(p.36.=)	V	36	V	syn	1	-0.0309331	0.14035	-0.0566001	0.00559876	-0.0272432	0.0726426	-0.084584	0.167351	-0.117387	0.010817	-0.0425278	0.0630335	-0.140263	0.120098	0.0132015	0.0913796	-0.232399	0.174192
(p.Val.36.Trp)	V	36	W	var	1	0.523125	0.126578	0.104854	0.19981	0.111162	0.0681651	0.552174	0.064532	0.0262467	0.023149	0.0173629	0.0142356	0.285896	0.00800414	-0.0018365	0.164484	0.297694	0.1683
(p.Val.36.Tyr)	V	36	Y	var	1	0.667832	0.303372	0.154341	0.170578	0.00740838	0.129199	0.753353	0.18196	0.0452619	0.033915	-0.0381346	0.0408107	0.686491	0.0649285	0.0961383	0.155996	0.429803	0.222797
(p.Ser.37.Ter)	S	37	*	var	1	-5.13433	0.331406	-3.16896	0.405747	-0.306452	0.105009	-5.31245	0.00366369	-3.25761	0.150089	-0.479544	0.407072	-2.67501	0.395549	-1.94178	0.539652	-2.78349	0.624027
(p.Ser.37.Ala)	S	37	A	var	1	0.00250338	0.249515	0.0770333	0.0642051	0.0377628	0.0921985	-0.0433467	0.223242	0.102233	0.0388966	0.0642846	0.039134	-0.146741	0.155953	0.117193	0.0733547	-0.132296	0.360757
(p.Ser.37.Cys)	S	37	C	var	1	-2.18847	0.119728	0.101486	0.137672	0.0810094	0.0380913	-2.29626	0.238627	0.173101	0.0390118	0.137252	0.0250532	-1.81885	0.521603	0.156058	0.0987094	-1.59655	0.955471
(p.Ser.37.Asp)	S	37	D	var	1	0.174205	0.0212914	0.0365061	0.0136463	-0.0278721	0.296516	-0.0155462	0.337207	-0.124121	0.00109944	-0.100346	0.0860268	-0.069454	0.280897	0.0268479	0.235011	0.0505736	0.0777106
(p.Ser.37.Glu)	S	37	E	var	1	-0.0374391	0.265472	0.0764653	0.0223897	0.014971	0.165971	-0.162577	0.195782	0.0104318	0.0228075	0.0294745	0.00298964	-0.156894	0.121516	-0.0366124	0.00571711	-0.158334	0.150104
(p.Ser.37.Phe)	S	37	F	var	1	-0.341481	0.924044	0.0865596	0.0339548	0.108613	0.272369	-0.100508	0.0482329	0.236481	0.153616	0.0360289	0.210501	-0.0890346	0.183594	0.271017	0.0641488	0.0444678	0.0551269
(p.Ser.37.Gly)	S	37	G	var	1	-0.199601	0.376858	0.0954172	0.0954472	0.0167932	0.0303541	-0.102228	0.149982	0.00851964	0.0277964	0.0235575	0.0144651	-0.203726	0.130562	0.0287059	0.0854317	-0.145284	0.206156
(p.Ser.37.His)	S	37	H	var	1	-0.0479416	0.451001	-0.0361057	0.0594988	-0.128534	0.594454	0.190499	0.261389	0.158275	0.336463	-0.0362731	0.0266289	-0.203554	0.292772	0.252104	0.1395	0.128113	0.0478136
(p.Ser.37.Ile)	S	37	I	var	1	-0.990687	0.81981	0.153564	0.000734534	0.191246	0.13403	-1.53851	0.500894	0.0453912	0.210247	0.0117673	0.195405	-1.20143	0.348377	0.0253401	0.0456071	-1.27088	0.947451
(p.Ser.37.Lys)	S	37	K	var	1	-2.10666	0.0498839	0.0478276	0.00184106	0.0654787	0.0937103	-2.3201	0.563264	0.0660325	0.213845	-0.000522257	0.190004	-1.8237	0.579994	0.170255	0.0410755	-1.3263	0.689049
(p.Ser.37.Leu)	S	37	L	var	1	-0.1726	0.455666	0.0587855	0.0833697	0.00373693	0.00388166	-0.139424	0.205739	0.00298138	0.0152578	0.0600555	0.0498776	-0.194493	0.2488	0.173699	0.0934845	-0.412066	0.523803
(p.Ser.37.Met)	S	37	M	var	1	-0.411241	1.28155	0.0723698	0.0245976	0.0762068	0.186131	0.208704	0.165383	0.147394	0.153015	0.127411	0.445783	0.234972	0.045637	0.269465	0.184378	-0.0101094	0.215276
(p.Ser.37.Asn)	S	37	N	var	1	-1.48433	0.948957	0.0570963	0.00771261	0.124695	0.0670496	-1.76212	0.30758	-0.229147	0.160553	-0.0450559	0.200483	-1.52482	0.767758	-0.0152678	0.122542	-1.30908	0.919695
(p.Ser.37.Pro)	S	37	P	var	1	-0.660834	0.719847	-0.0976489	0.134023	0.0112458	0.0817608	-0.465277	0.193133	0.0690208	0.167583	0.159646	0.119717	-0.226911	0.101926	0.114416	0.0262799	-0.195842	0.350772
(p.Ser.37.Gln)	S	37	Q	var	1	-0.859542	0.382213	0.155582	0.224464	0.0889076	0.0686556	-0.854741	0.522581	0.136921	0.171385	0.23076	0.125827	-0.632907	0.642465	0.334027	0.291607	-0.573433	0.73928
(p.Ser.37.Arg)	S	37	R	var	1	-0.179442	0.227014	0.0799431	0.0537621	0.050029	0.0799139	-0.367732	0.188604	-0.00962743	0.11242	-0.0037743	0.0934853	-0.279036	0.0755144	0.0163335	0.0304171	-0.229309	0.171312
(p.37.=)	S	37	S	syn	1	-0.177611	0.118004	0.0120383	0.0189329	-0.0068257	0.203446	-0.206373	0.200174	-0.0813611	0.1329	-0.0285107	0.0282831	-0.219844	0.0563787	0.0618736	0.150772	-0.0853475	0.243673
(p.Ser.37.Thr)	S	37	T	var	1	-0.0635312	0.0241885	0.0964782	0.102248	-0.0300375	0.118041	-0.322752	0.141338	-0.0903421	0.230207	-0.0655589	0.161461	-0.36282	0.0447588	0.0331079	0.0227552	-0.482692	0.183907
(p.Ser.37.Val)	S	37	V	var	1	-1.15973	0.722985	0.13012	0.0659035	-0.0493057	0.0935009	-1.36492	0.447146	0.00801835	0.207221	0.0230559	0.0777059	-1.04084	0.336791	0.0904277	0.118751	-1.12817	0.95005
(p.Ser.37.Trp)	S	37	W	var	1	0.164085	0.00845472	0.152422	0.152288	0.0394285	0.1718	0.131013	0.107123	0.040674	0.0130725	-0.0354138	0.0299451	0.0522338	0.210543	0.137922	0.158345	-0.155527	0.369367
(p.Ser.37.Tyr)	S	37	Y	var	1	-0.324962	0.485452	0.079301	0.233732	0.102425	0.0408207	0.0220419	0.246909	-0.015566	0.0314721	0.254721	0.0925185	0.0664266	0.319723	0.147774	0.548344	0.0214465	0.604128
(p.Glu.38.Ter)	E	38	*	var	1	-4.26777	0.817761	-3.14038	0.128664	-0.173556	0.0108204	-4.29915	0.200845	-3.26857	0.241835	-0.401244	0.385262	-2.32824	0.533749	-1.94315	0.494092	-2.99803	1.02301
(p.Glu.38.Ala)	E	38	A	var	1	0.47824	0.0386644	0.102807	0.07604	0.0508597	0.0391215	0.414822	0.0818281	0.0579353	0.0483076	0.0570659	0.0729566	0.31941	0.0412218	0.048814	0.10077	0.166974	0.0321813
(p.Glu.38.Cys)	E	38	C	var	1	-2.56065	0.385009	0.0547015	0.10432	0.0332096	0.0836995	-2.61133	0.026208	-0.00927523	0.053364	0.0568735	0.0296841	-1.8315	0.254158	0.122373	0.0458824	-2.26846	1.31902
(p.Glu.38.Asp)	E	38	D	var	1	0.55049	0.098296	0.273246	0.0281012	0.176875	0.114708	0.217208	0.0239089	-0.0725474	0.0177285	-0.139562	0.12948	0.202965	0.198117	0.018405	0.186238	0.111003	0.271546
(p.38.=)	E	38	E	syn	1	0.269068	0.103784	-0.00499782	0.0229649	-0.00640285	0.0174694	0.154413	0.0116883	0.0280397	0.0034947	-0.0937441	0.11282	-0.013436	0.00142231	-0.0169066	0.00306919	-0.0292686	0.055956
(p.Glu.38.Phe)	E	38	F	var	1	-1.14084	1.60628	-0.0250912	0.0630349	-0.305998	0.0105558	-0.602969	0.635915	0.0558623	0.471558	-0.211939	0.186926	-0.205988	0.0716107	0.0518015	0.587287	-0.818287	0.203234
(p.Glu.38.Gly)	E	38	G	var	1	0.528672	0.058921	0.0429807	0.062758	0.0165546	0.0399146	0.502086	0.0243421	-0.0114099	0.00770659	-0.00921046	0.0642551	0.514497	0.0311805	0.0340099	0.119428	0.294159	0.0906989
(p.Glu.38.His)	E	38	H	var	1	-0.10707	0.600809	-0.0636564	0.182505	-0.00534292	0.0931225	0.0726177	0.0269954	0.152572	0.0454171	0.124172	0.226946	-0.10142	0.254439	-0.056824	0.440851	-0.337271	0.649872
(p.Glu.38.Ile)	E	38	I	var	1	0.210843	0.123175	0.0870049	0.00923916	0.111878	0.0774875	-0.190517	0.140205	-0.0694057	0.0142309	0.0537904	0.211894	0.0345064	0.29567	-0.00767456	0.133066	-0.146442	0.398782
(p.Glu.38.Lys)	E	38	K	var	1	0.275505	0.417969	0.107188	0.0990282	0.0335902	0.0995463	0.155118	0.126114	0.050549	0.1083	0.0905706	0.0479418	0.175567	0.240292	0.175977	0.144783	0.0960034	0.118569
(p.Glu.38.Leu)	E	38	L	var	1	0.586374	0.165498	0.0628151	0.044168	0.0692946	0.126869	0.147367	0.148494	-0.0633944	0.00758095	-0.0917939	0.0146752	0.265345	0.00743411	-0.00744739	0.119625	-0.0800604	0.241977
(p.Glu.38.Met)	E	38	M	var	1	0.0265556	0.35053	-0.0183039	0.0803392	0.00505769	0.0107776	0.00827834	0.202546	0.0893081	0.0942141	0.0527177	0.0219746	0.130759	0.0224886	0.0508936	0.261917	0.0702685	0.131623
(p.Glu.38.Asn)	E	38	N	var	1	0.877344	0.158864	0.30955	0.39404	0.406106	0.329383	0.380585	0.147612	-0.155449	0.0158326	-0.222137	0.186829	0.0945169	0.0163144	0.00286334	0.0946253	0.0876809	0.11517
(p.Glu.38.Pro)	E	38	P	var	1	0.42344	0.320498	-0.0909681	0.217107	0.0309546	0.0151932	-1.14917	1.16069	0.194688	0.247573	0.307674	0.245897	-0.231394	0.892853	0.0791209	0.0967502	-0.338024	0.748398
(p.Glu.38.Gln)	E	38	Q	var	1	-0.681856	0.914425	-0.074021	0.304889	-0.276862	0.437827	0.0662883	0.145309	-0.0109346	0.0506994	0.142777	0.00553755	-0.156471	0.244935	0.0849878	0.194265	-0.0333027	0.166193
(p.Glu.38.Arg)	E	38	R	var	1	0.0316741	0.269436	0.0701184	0.0785936	0.0151169	0.020292	-0.0248126	0.27842	-0.0223052	0.0669644	-0.0143129	0.0668784	-0.0226138	0.198533	0.0423294	0.08349	-0.184191	0.32169
(p.Glu.38.Ser)	E	38	S	var	1	0.228807	0.00559328	0.0418087	0.114088	0.0282392	0.0277411	0.136197	0.0248984	-0.0325322	0.00989654	0.0265597	0.108744	0.0770579	0.127967	0.0839071	0.096179	0.182499	0.0216515
(p.Glu.38.Thr)	E	38	T	var	1	0.122479	0.13525	-0.0489085	0.278459	-0.104212	0.356685	0.20647	0.0182499	-0.124278	0.303512	0.0145701	0.380635	0.146098	0.250946	-0.0522867	0.178321	0.11364	0.194542
(p.Glu.38.Val)	E	38	V	var	1	0.205499	0.113186	0.136885	0.109657	0.0932926	0.138343	0.0387432	0.122211	-0.0591409	0.0891749	-0.0314819	0.00119706	0.0633641	0.100656	0.00502584	0.113261	-0.0597623	0.146389
(p.Glu.38.Trp)	E	38	W	var	1	0.114978	0.0432622	0.0177937	0.00176633	-0.0430614	0.0621758	-0.905726	0.634287	0.0793313	0.15491	-0.0308243	0.0838257	-0.290903	0.340422	0.0596234	0.0322441	-0.938457	0.959715
(p.Glu.38.Tyr)	E	38	Y	var	1	0.401397	0.0969512	0.232827	0.0682877	0.144367	0.496268	-0.199531	0.571614	0.258774	0.328401	0.224667	0.159166	0.0617076	0.138253	0.0766453	0.169238	-0.0455139	0.238432
(p.Ile.39.Ter)	I	39	*	var	2	-4.72287	0.637701	-3.54823	0.128049	-0.126529	0.0100174	-7.69971	1.41454	-3.60419	0.0233142	-0.845006	0.869574	-3.8461	0.00997677	-2.71531	0.00266984	-4.43559	0.726697
(p.Ile.39.Ala)	I	39	A	var	2	0.96756	0.0817345	0.134228	0.0463147	0.102659	0.142749	-2.31665	1.22718	0.048492	0.102622	-0.0722523	0.0286663	-0.512756	1.12574	0.0959108	0.159537	-1.89274	1.89126
(p.Ile.39.Cys)	I	39	C	var	2	-2.00869	0.0539605	0.106435	0.135625	0.0712013	0.0732312	-4.26691	1.58566	-0.042394	0.051622	0.0241393	0.0104444	-2.78048	0.0475962	0.166047	0.0934151	-2.94546	0.592801
(p.Ile.39.Asp)	I	39	D	var	2	-0.0664974	0.210339	0.312996	0.0943304	0.00168349	0.22831	-4.10709	0.657629	0.0460783	0.185673	0.00984299	0.0933209	-2.91209	0.536502	0.062949	0.070967	-2.80553	1.50613
(p.Ile.39.Glu)	I	39	E	var	2	0.540882	0.120349	0.035216	0.00194055	0.0174039	0.146962	-2.66473	0.503618	0.129697	0.0104631	-0.00956346	0.154118	-1.61786	0.791013	0.163689	0.0473432	-1.86927	1.09979
(p.Ile.39.Phe)	I	39	F	var	2	0.606797	0.4147	0.12982	0.17873	-0.0506703	0.197746	-1.18954	1.63132	-0.224828	0.30139	-0.417919	0.0645321	0.390801	0.22606	-0.0896815	0.00947044	-0.989737	1.38783
(p.Ile.39.Gly)	I	39	G	var	2	0.739279	0.127881	0.0314802	0.0141405	0.0306049	0.111193	-2.81069	0.969885	0.0902433	0.042122	-0.0149326	0.0097516	-1.27202	1.32345	0.102093	0.0436719	-2.09012	1.69849
(p.Ile.39.His)	I	39	H	var	2	0.23198	0.156382	0.0954329	0.17053	-0.0812694	0.440724	-4.01306	0.552994	-0.0461746	0.0710439	-0.222007	0.119839	-1.73087	1.25952	-0.0404878	0.192419	-2.51587	1.76601
(p.39.=)	I	39	I	syn	2	0.245963	0.281134	0.0408332	0.0324393	-0.0589422	0.228354	0.100898	0.251183	-0.120506	0.251493	-0.0212076	0.260967	0.140482	0.152518	-0.11844	0.470888	0.257331	0.445865
(p.Ile.39.Lys)	I	39	K	var	2	0.439792	0.167053	0.0263224	0.101575	-0.0253367	0.0731369	-4.07451	0.434028	0.147439	0.148358	0.0311904	0.183868	-2.15571	1.15249	0.174282	0.0288998	-2.83027	1.92429
(p.Ile.39.Leu)	I	39	L	var	2	0.890878	0.147275	0.0873643	0.0888644	0.0255352	0.0393191	1.13041	0.138231	0.214563	0.0333963	0.00464514	0.111447	1.21356	0.0621686	0.241009	0.129254	0.758967	0.288871
(p.Ile.39.Met)	I	39	M	var	2	0.94159	0.309233	0.043442	0.130484	0.151021	0.316388	1.11005	0.363783	-0.0347528	0.10427	-0.131317	0.211983	1.15802	0.0686425	-0.0467333	0.0344571	0.709548	0.139755
(p.Ile.39.Asn)	I	39	N	var	2	0.318055	0.137077	0.0867873	0.141576	-0.190802	0.00253454	-3.19294	0.752704	0.0719245	0.0868603	-0.0695801	0.258403	-1.94751	1.29477	0.264084	0.158611	-2.68044	1.90322
(p.Ile.39.Pro)	I	39	P	var	2	1.17296	0.0984389	0.221608	0.169261	0.101371	0.0279387	-1.26359	2.52747	0.156632	0.269957	0.0736537	0.104614	0.65378	0.797801	0.309589	0.169492	0.0119317	0.87972
(p.Ile.39.Gln)	I	39	Q	var	2	0.849936	0.308972	-0.00246036	0.0536453	-0.0419534	0.260177	-2.30588	1.65271	0.0915564	0.103395	-0.0561871	0.047634	-0.157692	0.973831	0.0214278	0.0558439	-1.62801	1.96587
(p.Ile.39.Arg)	I	39	R	var	2	0.511298	0.0500623	0.0531621	0.0324593	0.0531654	0.0932146	-3.24247	0.946396	0.0504656	0.0421327	-0.0507003	0.00747904	-1.80059	1.10826	0.0916145	0.0986459	-2.42739	1.57516
(p.Ile.39.Ser)	I	39	S	var	2	0.453369	0.0315555	0.137901	0.0422914	0.0242401	0.200526	-2.74388	1.05102	0.0851827	0.0326647	0.0139611	0.109297	-1.33685	1.12719	0.128641	0.0260366	-1.84568	1.36976
(p.Ile.39.Thr)	I	39	T	var	2	0.811484	0.193459	-0.00482204	0.0985256	-0.0401804	0.129928	-0.301688	1.02936	0.0163252	0.0898782	0.00976257	0.000538499	0.494205	0.326536	0.0430978	0.0596181	-0.0705873	0.609142
(p.Ile.39.Val)	I	39	V	var	2	0.812905	0.158407	-0.00636358	0.00411387	0.0121994	0.100625	1.08975	0.291356	0.0537956	0.0577854	-0.0361719	0.0562224	1.00614	0.134141	0.0775582	0.00940616	0.954415	0.613979
(p.Ile.39.Trp)	I	39	W	var	2	0.925613	0.156726	0.0348703	0.0181973	-0.00439625	0.18634	-1.50545	1.88556	0.0882159	0.0497104	-0.0328659	0.0647017	0.402865	0.619074	0.097263	0.0626946	-1.22385	1.49436
(p.Ile.39.Tyr)	I	39	Y	var	2	1.15671	0.232952	0.175838	0.0655661	0.254394	0.111318	-3.12688	1.7494	-0.282376	0.288341	-0.264868	0.650881	-1.47018	1.86635	-0.421241	0.535799	-3.37007	2.95759
(p.Pro.40.Ter)	P	40	*	var	2	-4.67826	0.176313	-3.5764	0.247099	-0.230428	0.235191	-5.16219	0.179964	-3.87173	0.0961828	-0.729712	0.914033	-3.62861	0.513287	-2.71145	0.177672	-4.18981	1.22462
(p.Pro.40.Ala)	P	40	A	var	2	0.279356	0.131735	-0.134047	0.0900265	-0.127753	0.0585903	0.605921	0.153764	0.0567415	0.134626	-0.00608227	0.0677257	0.543624	0.0479547	0.0377086	0.091285	0.142885	0.00814906
(p.Pro.40.Cys)	P	40	C	var	2	-3.81429	0.0268576	0.198354	0.40255	0.158459	0.249608	-3.55571	1.06062	0.214711	0.04047	0.163159	0.188155	-2.93685	0.242107	0.0813598	0.0238912	-3.50229	0.687113
(p.Pro.40.Asp)	P	40	D	var	2	0.428067	0.1558	0.156672	0.115717	-0.0174271	0.186334	0.36013	0.299258	0.0755811	0.166192	0.0376756	0.471852	0.299986	0.0535729	0.0888058	0.0942251	-0.139215	0.369208
(p.Pro.40.Glu)	P	40	E	var	2	0.307602	0.0868725	0.139745	0.0023421	0.0440302	0.00899583	0.493243	0.0185529	0.0784039	0.056484	0.0513476	0.199615	0.405097	0.056553	0.116355	0.122082	0.146517	0.0458615
(p.Pro.40.Phe)	P	40	F	var	2	-0.351779	0.0593199	0.186474	0.033307	0.00794253	0.128688	-2.35298	0.576755	0.101617	0.297307	-0.119528	0.174007	-1.28504	0.343359	-0.00758493	0.163904	-1.55057	0.382208
(p.Pro.40.Gly)	P	40	G	var	2	0.420963	0.0565953	0.0555476	0.0714913	0.054118	0.0320814	0.719387	0.174197	0.109971	0.0841261	-0.00968196	0.0251117	0.635528	0.105586	0.0604826	0.0658201	0.17925	0.0565638
(p.Pro.40.His)	P	40	H	var	2	0.273719	0.0820055	-0.0933517	0.285804	-0.0176964	0.143934	0.133151	0.199083	-0.00776766	0.420785	-0.104426	0.107035	0.181457	0.113498	0.176141	0.37775	-0.552919	0.648313
(p.Pro.40.Ile)	P	40	I	var	2	0.0380652	0.0858738	0.111286	0.171805	0.161933	0.14364	-1.39213	0.974014	0.181325	0.0405033	0.0482768	0.0289455	-0.61272	0.145454	0.0667135	0.190023	-1.51261	0.800759
(p.Pro.40.Lys)	P	40	K	var	2	0.226585	0.0410311	0.0853403	0.170645	-0.107778	0.149256	0.429054	0.260734	0.136537	0.158433	0.0631846	0.221049	0.347831	0.0597814	0.013286	0.205658	-0.0571041	0.222629
(p.Pro.40.Leu)	P	40	L	var	2	0.0236788	0.0597998	0.0904476	0.006174	0.0482823	0.0860047	-0.686316	0.407091	-0.0210048	0.16804	-0.0943977	0.197355	-0.436952	0.0266468	0.00780441	0.100885	-0.959996	0.580343
(p.Pro.40.Met)	P	40	M	var	2	0.0750128	0.169667	0.208758	0.279644	0.123474	0.156333	0.180247	0.0299403	0.0342783	0.0520168	0.124727	0.261882	0.277676	0.398813	0.108865	0.0781342	-0.252593	0.118223
(p.Pro.40.Asn)	P	40	N	var	2	0.176653	0.0694308	0.13879	0.205053	0.332338	0.273069	0.0626921	0.0596051	-0.07075	0.11631	0.00786777	0.182323	-0.0264812	0.129836	-0.0863644	0.0937976	-0.295185	0.0178384
(p.40.=)	P	40	P	syn	2	-0.465229	0.163438	0.0252007	0.128211	-0.178675	0.00994083	-0.43279	0.0654351	0.0617972	0.0839817	0.0659617	0.177964	-0.301705	0.297553	0.143221	0.14375	-0.30533	0.405406
(p.Pro.40.Gln)	P	40	Q	var	2	0.262617	0.0757149	0.0778302	0.198829	0.046562	0.163001	0.128088	0.0528796	-0.0968063	0.0738919	-0.117046	0.0510996	0.17992	0.0464215	-0.123981	0.0686685	-0.192171	0.0345403
(p.Pro.40.Arg)	P	40	R	var	2	0.0869861	0.0635399	0.00414462	0.0113801	0.00336614	0.104631	0.0779624	0.129941	0.0800064	0.00768441	-0.0180509	0.0223487	0.0854248	0.0172449	0.00744004	0.0454583	-0.589271	0.434186
(p.Pro.40.Ser)	P	40	S	var	2	0.152446	0.0528312	0.0371328	0.006943	0.0689151	0.120718	0.213934	0.140377	0.0748012	0.208705	0.0973663	0.236262	0.164522	0.174657	0.00234314	0.0777162	-0.166373	0.366716
(p.Pro.40.Thr)	P	40	T	var	2	0.14251	0.0203535	-0.115391	0.293655	-0.0122873	0.0914415	-0.0259344	0.396648	-0.0345694	0.238264	-0.0106728	0.185728	0.0721418	0.224431	-0.0820105	0.232106	-0.459719	0.493061
(p.Pro.40.Val)	P	40	V	var	2	0.311063	0.0165108	-0.0558015	0.0884853	-0.0301549	0.0381918	-0.0471352	0.387105	0.131889	0.0741579	0.0190351	0.021707	0.241062	0.0235381	0.119284	0.00441146	-0.596005	0.647426
(p.Pro.40.Trp)	P	40	W	var	2	-0.545648	0.00404331	0.0875841	0.0712642	0.00955309	0.171106	-2.49831	0.715596	0.128741	0.104655	-0.00112359	0.117555	-1.66163	0.764645	-0.0844285	0.0211098	-2.6884	1.39567
(p.Pro.40.Tyr)	P	40	Y	var	2	-0.580359	0.138543	0.204742	0.0931242	0.0577739	0.357565	-2.25413	1.00771	0.165278	0.00190342	-0.107392	0.136006	-1.16289	0.585769	-0.0344759	0.252313	-2.69495	1.74193
(p.Val.41.Ter)	V	41	*	var	2	-4.20184	0.190783	-3.09458	0.390956	-0.155282	0.0526029	-5.07022	0.321481	-2.74278	0.0668042	-0.248048	0.354002	-3.10692	0.12313	-2.35276	0.182297	-3.32248	0.479052
(p.Val.41.Ala)	V	41	A	var	2	0.697362	0.182199	0.0843637	0.0347445	0.00238019	0.123063	1.0038	0.326768	0.103891	0.0188726	0.0318931	0.00704301	0.906931	0.134641	0.0808719	0.0137142	0.547706	0.316154
(p.Val.41.Cys)	V	41	C	var	2	-2.05978	0.170564	0.00995422	0.0373613	-0.0141593	0.0176587	-1.53454	0.144057	0.164634	0.0830214	0.176311	0.0113388	-1.23181	0.035482	-0.0108755	0.182059	-2.08227	0.825833
(p.Val.41.Asp)	V	41	D	var	2	0.776112	0.400969	0.215117	0.219469	0.129508	0.21501	1.12287	0.372619	0.223714	0.0464454	0.0570461	0.163598	0.859215	0.145733	0.223237	0.013513	0.151683	0.415552
(p.Val.41.Glu)	V	41	E	var	2	0.493912	0.0238268	0.165641	0.0544445	0.096234	0.0379801	0.742722	0.202048	0.120768	0.0230098	0.0275027	0.0495695	0.49802	0.115855	0.104431	0.0393219	0.398173	0.197943
(p.Val.41.Phe)	V	41	F	var	2	-2.38307	0.271302	-0.023094	0.171552	-0.0453693	0.00642823	-1.98645	0.853241	0.42637	0.385045	0.217797	0.170308	-1.58654	0.412556	0.453519	0.0773614	-1.3396	1.25617
(p.Val.41.Gly)	V	41	G	var	2	0.567826	0.0733465	0.0544031	0.0522563	0.0410624	0.00448274	0.355289	0.0888611	0.115976	0.011181	0.0413564	0.00743738	0.48586	0.0163942	0.0551294	0.0420792	-0.330315	0.34698
(p.Val.41.His)	V	41	H	var	2	-0.113016	0.153099	0.065439	0.044853	-0.0990202	0.0217552	-0.393282	0.187194	-0.042563	0.265307	0.0961243	0.135628	-0.341504	0.31778	0.19966	0.173719	-1.01576	0.359563
(p.Val.41.Ile)	V	41	I	var	2	-2.59968	0.203557	-0.117002	0.00917846	-0.116651	0.0328277	-2.62117	0.662239	0.12138	0.0372443	-0.047418	0.0992918	-2.18749	0.133739	0.119948	0.036096	-1.24924	0.892156
(p.Val.41.Lys)	V	41	K	var	2	-0.171134	0.0442594	0.169241	0.0242287	0.072764	0.157023	-0.653624	0.327055	0.0501681	0.0509709	-0.0128454	0.0245133	-0.364965	0.0734745	0.00105957	0.0703816	-0.893906	0.617907
(p.Val.41.Leu)	V	41	L	var	2	-1.13856	0.0883217	-0.0271128	0.032225	-0.103263	0.0379317	-1.15263	0.093765	0.107236	0.197989	0.100235	0.181208	-0.966918	0.202358	0.0239105	0.166704	-0.497476	0.042744
(p.Val.41.Met)	V	41	M	var	2	-1.72887	0.00146569	0.00221818	0.0811307	-0.149234	0.438485	-1.9456	0.454404	0.227857	0.128369	-0.033234	0.289256	-1.626	0.213744	0.0265499	0.0776156	-1.27465	1.15401
(p.Val.41.Asn)	V	41	N	var	2	0.201789	0.0616398	0.181009	0.142086	0.102112	0.235719	0.499872	0.292217	0.318735	0.27806	0.22123	0.339037	0.329952	0.0514402	0.242618	0.264566	-0.196497	0.757325
(p.Val.41.Pro)	V	41	P	var	2	0.550078	0.139019	0.0375397	0.206103	0.0268179	0.0509749	0.855171	0.258645	0.104737	0.174109	-0.0462027	0.0149678	0.823819	0.132453	0.0370972	0.089217	0.514872	0.401219
(p.Val.41.Gln)	V	41	Q	var	2	0.0858972	0.0349018	0.0418695	0.0228963	0.177061	0.0825366	0.00498479	0.0519583	0.167203	0.128017	0.0465843	0.150243	-0.104791	0.187939	0.123279	0.152746	-0.308179	0.0669883
(p.Val.41.Arg)	V	41	R	var	2	-0.648423	0.00604929	0.0360864	0.0102792	0.102496	0.00487275	-0.672958	0.228588	0.117857	0.0370365	0.0936141	0.0825219	-0.406551	0.0177304	0.0888812	0.0458902	-0.532871	0.291829
(p.Val.41.Ser)	V	41	S	var	2	0.329405	0.098183	0.096114	0.0440734	-0.0256076	0.139119	0.600936	0.0374136	0.167787	0.161665	-0.0135824	0.00139069	0.496198	0.0218736	0.219859	0.0744375	0.0323071	0.20541
(p.Val.41.Thr)	V	41	T	var	2	0.180953	0.0929992	0.151262	0.0138483	0.14101	0.207206	0.19677	0.0865011	0.173088	0.0169439	0.0143223	0.218204	0.0975317	0.11967	0.0434449	0.0273214	-0.24607	0.150746
(p.41.=)	V	41	V	syn	2	0.2649	0.0577692	0.0727224	0.111423	-0.0433762	0.0416604	0.210632	0.0102945	0.0117923	0.0740698	-0.0723206	0.0158222	0.181314	0.0195806	0.00380577	0.0266524	0.172881	0.0039636
(p.Val.41.Trp)	V	41	W	var	2	-3.11325	0.151398	0.104683	0.0638678	0.024284	0.0119948	-3.13748	0.782375	0.249547	0.00236473	0.0999683	0.0255066	-2.8276	0.198994	0.163125	0.0901352	-2.37529	0.856407
(p.Val.41.Tyr)	V	41	Y	var	2	-1.587	0.157265	-0.0883914	0.246709	-0.0414669	0.0822719	-1.96404	0.635258	0.180065	0.0408294	-0.132601	0.235456	-1.67321	0.453724	0.0786583	0.010982	-1.46714	0.510238
(p.Gly.42.Ter)	G	42	*	var	2	-5.92211	0.0924383	-3.67575	0.191105	-0.0697177	0.1108	-7.34497	0.713882	-4.14077	0.653537	-0.651002	0.515859	-4.05306	0.215391	-3.20495	0.0277458	-4.93323	0.220693
(p.Gly.42.Ala)	G	42	A	var	2	-0.582489	0.000782247	0.0882692	0.0629057	0.00919862	0.0594327	-3.08418	0.725124	0.139603	0.0670184	0.0654356	0.135623	-2.16649	0.63519	0.13096	0.0659747	-2.50952	0.834804
(p.Gly.42.Cys)	G	42	C	var	2	-3.38241	0.112232	0.132269	0.0267013	0.140054	0.313763	-5.06373	0.572164	-2.28534	0.46858	-0.193052	0.133358	-3.4311	0.0974757	-1.60303	1.10403	-3.63792	0.886331
(p.Gly.42.Asp)	G	42	D	var	2	0.0764691	0.146499	-0.0338588	0.133325	0.0456209	0.115889	-0.99984	1.21576	0.0730583	0.23103	-0.0485421	0.152674	-0.321947	0.403739	0.12769	0.110952	-0.79273	0.810083
(p.Gly.42.Glu)	G	42	E	var	2	0.144337	0.0318768	0.0922945	0.0128863	-0.0533547	0.0440511	-2.10695	0.839119	0.0211461	0.0270986	0.0206623	0.0480263	-0.856791	0.529475	0.0412134	0.00527233	-1.65862	1.21764
(p.Gly.42.Phe)	G	42	F	var	2	-1.59114	0.114171	-0.112874	0.188043	-0.144117	0.613725	-3.05049	1.11868	0.117486	0.195087	0.3078	0.105272	-1.60019	0.571731	0.0702011	0.127074	-3.15526	1.27171
(p.42.=)	G	42	G	syn	2	-0.115123	0.134243	0.0661105	0.00668036	-0.0171976	0.0888391	-0.152813	0.185975	0.0148438	0.137489	-0.0263184	0.0215101	-0.0963712	0.138454	0.0345362	0.0629901	-0.0899837	0.13727
(p.Gly.42.His)	G	42	H	var	2	-0.176717	0.269651	-0.110301	0.340546	0.00184826	0.240456	-1.05473	0.70274	0.052252	0.227216	-0.156275	0.116877	-0.316043	0.675469	0.0968299	0.0666184	-1.17021	0.961456
(p.Gly.42.Ile)	G	42	I	var	2	-4.92093	0.519194	0.0977207	0.028598	0.109157	0.33769	-7.15628	2.01615	-3.27436	0.382564	-0.0380652	0.24701	-3.55282	0.18367	-2.69247	0.0774968	-5.08857	1.42254
(p.Gly.42.Lys)	G	42	K	var	2	-0.833703	0.046794	0.238688	0.194416	0.153023	0.191473	-3.02275	1.07434	0.0589114	0.535619	-0.0413934	0.0858302	-2.34362	0.636057	-0.0146063	0.22614	-2.75296	1.19764
(p.Gly.42.Leu)	G	42	L	var	2	-2.51311	0.046996	0.105081	0.195771	0.0799307	0.102414	-4.75619	1.4952	-1.47801	1.07108	-0.119621	0.0174703	-2.90485	0.128289	-0.678049	0.513882	-3.88724	0.62049
(p.Gly.42.Met)	G	42	M	var	2	-2.40873	0.674282	0.0951585	0.103376	0.18172	0.00436559	-4.85232	1.88786	-0.260728	0.622343	0.0315143	0.157007	-2.88163	0.348134	0.00373799	0.197304	-3.97535	1.23946
(p.Gly.42.Asn)	G	42	N	var	2	0.155985	0.16744	0.33269	0.00219896	-0.0690976	0.102818	-0.638519	0.795127	0.137205	0.261201	0.190578	0.0451753	-0.0912199	0.339857	0.226971	0.203047	-0.702639	0.811889
(p.Gly.42.Pro)	G	42	P	var	2	-1.38332	0.359226	-0.104814	0.00653838	0.035406	0.140775	-4.57239	1.71125	-0.0677215	0.0295732	-0.154162	0.0313784	-2.93529	0.126494	-0.108026	0.170721	-3.99864	1.10556
(p.Gly.42.Gln)	G	42	Q	var	2	-0.73776	0.0940835	0.100562	0.135065	-0.0871558	0.0489579	-3.95442	1.2105	0.238415	0.171999	0.0270788	0.136876	-2.87302	0.541233	0.0917245	0.195339	-3.08023	0.885331
(p.Gly.42.Arg)	G	42	R	var	2	-0.587798	0.105694	0.139228	0.0791168	0.0561352	0.117158	-2.85404	0.764845	0.126659	0.165689	0.0182247	0.0242453	-2.20377	0.425367	0.18513	0.0367712	-2.59476	0.94359
(p.Gly.42.Ser)	G	42	S	var	2	-0.464646	0.0378784	0.0790942	0.0769881	0.0912604	0.0709946	-2.68503	0.909684	0.0743377	0.0851713	0.0585176	0.129092	-1.73313	0.938367	0.0387235	0.0777312	-2.76029	2.12058
(p.Gly.42.Thr)	G	42	T	var	2	-3.17755	0.00278193	0.162201	0.100756	0.0454504	0.116245	-4.44412	1.08194	-0.796091	1.34419	-0.0853684	0.0838643	-2.95915	0.11322	-0.0662018	0.215571	-4.018	0.495094
(p.Gly.42.Val)	G	42	V	var	2	-3.66816	0.135321	0.0618254	0.103307	-0.0660694	0.0200971	-5.24546	1.12477	-2.38104	0.239216	0.00366485	0.101599	-3.23579	0.187516	-1.87953	0.585607	-4.25249	0.455693
(p.Gly.42.Trp)	G	42	W	var	2	-0.96578	0.118404	0.0730021	0.0306323	-0.00100526	0.213831	-4.45815	0.750192	-0.147765	0.418832	0.00361595	0.135705	-3.58263	0.112549	-0.0501985	0.112771	-4.05026	0.379062
(p.Gly.42.Tyr)	G	42	Y	var	2	-1.36128	0.530561	-0.0290884	0.245805	-0.0730218	0.29003	-2.91221	0.589779	-0.0579748	0.150985	-0.0664016	0.0331591	-2.48505	0.0934141	0.235715	0.165191	-2.54756	0.499396
(p.Glu.43.Ter)	E	43	*	var	2	-3.86106	0.332782	-2.58618	0.223763	-0.247203	0.11896	-4.56692	0.561742	-2.70242	0.276676	-0.394171	0.684077	-3.038	0.048403	-2.2347	0.495825	-2.9513	0.335727
(p.Glu.43.Ala)	E	43	A	var	2	0.0599968	0.0458875	0.0795201	0.0504875	0.0430582	0.00443596	0.140294	0.096914	0.0870474	0.162772	0.0883637	0.0512608	0.160536	0.0899083	0.126565	0.0655065	0.0190126	0.242202
(p.Glu.43.Cys)	E	43	C	var	2	-2.92254	0.0611632	0.119611	0.00372749	-0.0402353	0.0883464	-2.77177	0.410854	0.153555	0.179698	0.103543	0.264438	-2.42677	0.159217	0.0538299	0.0688837	-2.62724	1.25327
(p.Glu.43.Asp)	E	43	D	var	2	-0.460879	0.174455	0.00412066	0.213661	0.0652056	0.0693073	-0.430619	0.251701	0.213593	0.215669	0.0723903	0.0482027	-0.294716	0.207246	0.225655	0.0383178	-0.35119	0.331256
(p.43.=)	E	43	E	syn	2	-0.134255	0.0236377	0.112603	0.112093	0.075631	0.1389	-0.048939	0.0084941	0.261864	0.00262824	0.0598792	0.163403	-0.101674	0.199065	0.131959	0.0565573	-0.131794	0.106062
(p.Glu.43.Gly)	E	43	G	var	2	0.612832	0.0816781	0.0839456	0.073646	0.0231548	0.00740958	0.766617	0.167354	0.137732	0.0683487	0.0345001	0.0489128	0.712667	0.0597231	0.0972691	0.0409714	0.338096	0.147117
(p.Glu.43.His)	E	43	H	var	2	-0.16406	0.0501208	0.118009	0.112205	-0.150854	0.338099	0.0595434	0.245641	0.312409	0.234651	0.314061	0.0217316	0.138264	0.20322	0.399071	0.19443	-0.162388	0.562342
(p.Glu.43.Ile)	E	43	I	var	2	-1.02874	0.346164	-0.050957	0.230481	-0.303737	0.168202	-1.46957	0.339204	0.0848699	0.0122906	-0.140793	0.0588909	-1.03808	0.396384	-0.0485529	0.0735148	-1.2268	1.38458
(p.Glu.43.Lys)	E	43	K	var	2	0.0555188	0.0633063	0.0792592	0.15495	-0.0563163	0.0982478	0.0993821	0.198749	0.0533524	0.226325	-0.0933166	0.0824002	0.0194799	0.109221	-0.00268099	0.0824186	-0.0720498	0.366978
(p.Glu.43.Leu)	E	43	L	var	2	-0.761606	0.244228	0.220126	0.0129897	0.0511596	0.190629	-1.07142	0.252565	0.0981395	0.0359436	0.0786357	0.0143376	-0.746544	0.139998	0.180626	0.121393	-0.901191	0.650701
(p.Glu.43.Met)	E	43	M	var	2	-0.0409432	0.0559201	0.0542133	0.0672262	0.0594453	0.119863	0.0549749	0.00100535	0.0581634	0.129878	0.0283223	0.123236	0.0133348	0.130627	0.0627415	0.0838793	-0.0184619	0.00393344
(p.Glu.43.Asn)	E	43	N	var	2	0.0287916	0.105683	0.0349622	0.0991874	-0.111327	0.0279567	0.31706	0.232602	0.323873	0.064401	0.287971	0.182361	0.283138	0.121549	0.417078	0.0153998	0.265687	0.205767
(p.Glu.43.Pro)	E	43	P	var	2	-2.00448	0.279386	-0.270486	0.131931	-0.119774	0.000702421	-2.5381	0.46093	-0.079291	0.00178938	-0.045805	0.11108	-2.00647	0.461536	0.0899108	0.00337693	-2.41899	0.405651
(p.Glu.43.Gln)	E	43	Q	var	2	-0.0833464	0.0853149	-0.0138538	0.0103144	-0.0657139	0.0398786	0.0948974	0.0514594	0.116833	0.145882	-0.0229349	0.0528908	0.0969352	0.126307	0.0732634	0.159216	0.250143	0.0186461
(p.Glu.43.Arg)	E	43	R	var	2	0.126597	0.0308114	0.0216078	0.0187658	-0.0469606	0.0532293	0.199302	0.0715319	0.116825	0.0516056	0.0323633	0.0791427	0.220798	0.0128908	0.0842806	0.0190363	0.219202	0.00354425
(p.Glu.43.Ser)	E	43	S	var	2	-0.0161906	0.0593102	0.0834712	0.0882166	-0.00729736	0.0857864	0.321847	0.124366	0.166226	0.211087	0.0345143	0.160339	0.345215	0.12581	0.143307	0.112731	0.329817	0.202293
(p.Glu.43.Thr)	E	43	T	var	2	0.0457876	0.0980778	-0.0580068	0.11913	-0.00974162	0.0899856	0.271619	0.0135155	0.112614	0.15915	0.0593121	0.0495626	0.324908	0.0202018	0.115297	0.120725	0.355556	0.0358441
(p.Glu.43.Val)	E	43	V	var	2	-0.207744	0.0831071	0.164487	0.0339878	0.0592106	0.131263	-0.410372	0.3193	0.075273	0.115898	-0.0403635	0.0414984	-0.254238	0.0944103	0.0686292	0.0347732	-0.383518	0.408503
(p.Glu.43.Trp)	E	43	W	var	2	-0.497907	0.0639433	0.0594175	0.0407359	-0.0182255	0.0468024	-1.59838	0.507479	0.0382485	0.0876081	0.053779	0.0487639	-0.932007	0.348345	0.0661392	0.0449503	-1.32352	0.781084
(p.Glu.43.Tyr)	E	43	Y	var	2	-1.02731	0.545377	0.0690052	0.223187	-0.0357558	0.29307	-2.12765	1.78261	0.0362788	0.449681	-0.144777	0.196859	-1.51639	0.941133	0.35455	0.494013	-0.704026	1.0426
(p.Val.44.Ter)	V	44	*	var	2	-7.60019	0.489242	-4.43125	0.12436	-0.45126	0.158391	-7.55169	0.237543	-4.09599	0.227794	-0.982441	0.821068	-4.18249	0.307467	-2.95359	0.0359268	-4.43445	0.19062
(p.Val.44.Ala)	V	44	A	var	2	-1.3559	0.128907	0.0234458	0.0470657	0.0422214	0.00853339	-1.93939	0.357444	0.0529845	0.0869872	0.0149554	0.0130605	-1.58483	0.351173	0.0843626	0.119408	-0.988179	0.604279
(p.Val.44.Cys)	V	44	C	var	2	-7.6651	1.6778	-1.83579	0.085368	0.170923	0.0208558	-5.62548	0.993959	-3.2511	0.628889	-0.0136234	0.0489205	-3.69883	0.410028	-2.40267	0.393276	-3.95311	0.187893
(p.Val.44.Asp)	V	44	D	var	2	-3.94198	0.233735	-2.38273	0.213022	-0.0669957	0.0219048	-4.18518	0.0105413	-2.70786	0.059449	-0.0444565	0.281052	-2.81488	0.120536	-2.19873	0.277739	-2.98494	0.321422
(p.Val.44.Glu)	V	44	E	var	2	-5.54665	0.350177	-2.96933	0.0607147	0.106596	0.275653	-6.43729	1.31905	-3.1575	0.437457	0.160558	7.77017e-05	-3.75934	0.171884	-2.58172	0.0418028	-3.83451	0.180269
(p.Val.44.Phe)	V	44	F	var	2	-6.08765	0.309792	-2.57745	0.407025	-0.011136	0.365462	-5.70179	0.286198	-3.1558	0.182819	-0.036504	0.319038	-3.48588	0.962762	-2.14205	0.0460812	-3.71862	0.615258
(p.Val.44.Gly)	V	44	G	var	2	-5.42091	0.022739	-0.605641	0.239759	0.0525337	0.00781763	-5.7216	0.154948	-2.98998	0.085494	0.0562745	0.0288115	-3.37906	0.0731441	-2.39248	0.176015	-3.78658	0.482592
(p.Val.44.His)	V	44	H	var	2	-5.49825	0.980022	-2.12179	0.224166	0.0284107	0.421389	-6.16783	0.0391274	-4.21213	1.56375	-0.215816	0.12174	-3.32615	0.417671	-2.98271	0.830985	-3.76641	0.504409
(p.Val.44.Ile)	V	44	I	var	2	-0.930131	0.0300102	-0.109534	0.0563555	0.163679	0.154098	-1.32577	0.219884	0.3266	0.356594	0.0735198	0.193227	-1.22787	0.142609	0.229822	0.135108	-0.634569	0.181889
(p.Val.44.Lys)	V	44	K	var	2	-7.63367	1.24529	-2.54407	0.405677	0.221595	0.0795751	-7.39431	1.80911	-3.20889	0.00291164	0.0786164	0.299568	-3.6524	0.437894	-2.91671	0.0541357	-4.51665	0.296994
(p.Val.44.Leu)	V	44	L	var	2	-4.36266	0.279738	0.0273751	0.0588697	-0.00712587	0.00410137	-4.10835	1.40802	0.120138	0.305394	0.0463599	0.00891461	-3.37642	0.305584	0.167679	0.0360883	-3.51359	0.972817
(p.Val.44.Met)	V	44	M	var	2	-5.39591	0.680965	0.150403	0.11625	0.0402839	0.00309604	-4.71169	2.03929	-0.193835	0.720291	0.206481	0.0266823	-3.31357	0.996672	0.0744207	0.33706	-3.55	1.20659
(p.Val.44.Asn)	V	44	N	var	2	-6.38242	0.0627107	-0.0351869	0.356243	0.0434288	0.0633416	-4.78861	1.98964	-0.0927293	0.822056	0.493293	0.289643	-3.68964	0.0963822	0.303357	0.0807103	-3.92238	0.283831
(p.Val.44.Pro)	V	44	P	var	2	0.00554039	0.250361	0.107359	0.169612	0.0503092	0.141568	-0.240523	0.0110419	0.13301	0.151673	0.191054	0.313453	0.096218	0.107066	0.267396	0.318685	0.40924	0.149873
(p.Val.44.Gln)	V	44	Q	var	2	-5.60576	1.50405	-0.364109	0.197623	-0.0122175	0.474406	-4.63957	0.505419	-2.81719	0.127543	0.163506	0.0895038	-3.05389	0.853508	-2.02501	0.762827	-3.73018	1.37457
(p.Val.44.Arg)	V	44	R	var	2	-7.20155	0.0237225	-3.04748	0.192627	0.102035	0.106956	-7.42586	0.163032	-4.07612	0.236181	0.104786	0.00380645	-3.70175	0.121891	-2.995	0.0722325	-4.1351	0.103687
(p.Val.44.Ser)	V	44	S	var	2	-2.06861	0.043693	-0.0342826	0.00511204	-0.0780342	0.254456	-3.22431	0.962556	0.0605154	0.00870804	0.0873373	0.122407	-1.71741	0.360718	0.119704	0.0477996	-2.13727	1.81049
(p.Val.44.Thr)	V	44	T	var	2	-1.72997	0.155165	-0.0381252	0.0238433	0.0546868	0.0378574	-3.08803	1.07416	0.0402835	0.22118	-0.0523902	0.0596571	-2.29151	0.678197	0.0926446	0.0288638	-2.1573	1.53774
(p.44.=)	V	44	V	syn	2	-0.585338	0.0789383	-0.0175597	0.00268971	-0.0501832	0.0129247	-0.523952	0.207153	0.0565697	0.0367828	0.0162092	0.0578011	-0.418859	0.107453	0.0573604	0.0930916	-0.317213	0.204365
(p.Val.44.Trp)	V	44	W	var	2	-6.58528	0.437874	-3.57231	0.0927252	0.0181139	0.0660302	-6.6958	0.864684	-3.6632	0.256585	-0.639959	0.812433	-4.04074	0.0672719	-2.88122	0.141954	-4.26932	0.51764
(p.Val.44.Tyr)	V	44	Y	var	2	-5.54524	0.0680106	-3.59278	0.460208	-0.0813429	0.252242	-7.36443	0.181091	-5.70121	1.29208	-0.403678	0.39611	-4.73027	1.14805	-3.84439	0.422884	-4.17053	0.352896
(p.Arg.45.Ter)	R	45	*	var	2	-5.53019	0.983804	-3.21504	0.34821	-0.204497	0.199865	-6.64456	1.43769	-3.4543	0.552433	-0.696371	0.53181	-4.51936	0.671305	-2.56819	0.172546	-4.275	0.815686
(p.Arg.45.Ala)	R	45	A	var	2	-0.569951	0.115468	-0.0586931	0.0612713	-0.0825131	0.00367751	-0.853661	0.369662	0.205933	0.0257237	0.0615695	0.160534	-0.580543	0.064478	0.14508	0.121165	-0.616648	0.532342
(p.Arg.45.Cys)	R	45	C	var	2	-2.63135	0.25838	0.0011976	0.0539456	0.0549377	0.181217	-2.99653	0.992719	-0.153439	0.408569	0.0705879	0.100901	-2.23807	0.0392612	-0.025743	0.0672479	-2.53758	0.365451
(p.Arg.45.Asp)	R	45	D	var	2	-1.64132	0.636523	-0.00993609	0.0861401	0.020527	0.0957297	-3.44436	1.14789	0.279367	0.102973	0.375362	0.171967	-1.81684	0.465469	0.283185	0.26021	-2.83542	2.27863
(p.Arg.45.Glu)	R	45	E	var	2	-0.286209	0.176388	-0.00689623	0.0514269	0.026335	0.0134506	-1.39363	0.831233	-0.0655964	0.00860658	-0.106244	0.113922	-0.673796	0.382474	-0.0553408	0.0619968	-1.14556	0.716298
(p.Arg.45.Phe)	R	45	F	var	2	-0.618932	0.254534	0.354499	0.419922	0.0223742	0.053499	-1.63625	1.72048	0.17078	0.693826	0.382819	0.744521	-1.97011	1.61955	0.447846	0.714946	-0.995557	0.627627
(p.Arg.45.Gly)	R	45	G	var	2	-0.112289	0.0328494	0.0454215	0.0036701	0.0316469	0.00510889	-0.826712	0.700496	0.119529	0.0605697	0.0471381	0.0132612	-0.394511	0.29448	0.109275	0.0450843	-0.787401	0.795111
(p.Arg.45.His)	R	45	H	var	2	-0.385836	0.151286	-0.43055	0.122738	-0.323598	0.127121	-1.6045	1.04277	-0.0680655	0.215282	-0.127845	0.202271	-0.805391	1.17644	0.418071	0.137543	-0.871224	1.00061
(p.Arg.45.Ile)	R	45	I	var	2	0.166647	0.176263	0.0184648	0.352434	0.0169477	0.176281	-0.0271086	0.956769	0.14922	0.205286	0.222765	0.180189	0.172803	0.0184712	0.390292	0.150158	-0.364038	0.570164
(p.Arg.45.Lys)	R	45	K	var	2	-0.269178	0.00443713	-0.103759	0.116634	-0.177685	0.0344968	-0.348108	0.119901	-0.114986	0.0840425	0.0832193	0.163274	-0.226023	0.151709	-0.154847	0.158916	-0.509958	0.369742
(p.Arg.45.Leu)	R	45	L	var	2	0.109454	0.0359798	0.193403	0.126091	-0.0382158	0.141852	-0.58517	0.448708	0.0489135	0.0536705	0.00892218	0.149991	-0.375253	0.245211	-0.0255999	0.0292357	-0.996466	0.914183
(p.Arg.45.Met)	R	45	M	var	2	0.416673	0.441721	0.135086	0.806903	0.164672	0.532945	0.525286	0.325496	0.206062	0.155319	-0.0106443	0.367357	0.508278	0.501494	0.400907	0.024331	0.284449	0.121009
(p.Arg.45.Asn)	R	45	N	var	2	-1.15521	0.116334	-0.43844	0.320319	0.170266	0.0616226	-2.96537	0.809147	0.11379	0.320065	-0.0194839	0.102177	-2.03263	0.01669	-0.127199	0.303868	-1.83404	0.214805
(p.Arg.45.Pro)	R	45	P	var	2	-4.15248	0.0114837	-0.146968	0.21169	0.135829	0.164122	-5.24446	1.07848	-2.73899	0.0394084	-0.0166013	0.0154199	-3.36758	0.547856	-1.72037	1.00969	-3.18207	1.07764
(p.Arg.45.Gln)	R	45	Q	var	2	-0.397215	0.00474395	0.00395107	0.108697	-0.0772953	0.169749	-0.978727	0.728456	-0.0735371	0.185583	0.0552018	0.100425	-0.684058	0.416697	0.0975011	0.127779	-0.71246	0.69978
(p.45.=)	R	45	R	syn	2	-0.400733	0.0338097	-0.0251485	0.0855943	0.0801398	0.0712979	-0.556015	0.250145	0.117826	0.00228556	0.0732447	0.042439	-0.422178	0.0715397	0.0782261	0.04626	-0.338469	0.177482
(p.Arg.45.Ser)	R	45	S	var	2	-0.283767	0.220361	0.0237289	0.349973	0.0673133	0.0876954	-0.90736	0.776319	0.133829	0.153531	0.116337	0.07311	-0.657996	0.390693	0.0643823	0.136252	-1.11142	1.07722
(p.Arg.45.Thr)	R	45	T	var	2	-0.387241	0.314951	-0.00856618	0.0697789	0.17082	0.442376	-2.26906	0.767322	-0.322463	0.161288	0.0204253	0.0767055	-1.06356	0.344519	-0.0562501	0.10883	-1.85121	0.857353
(p.Arg.45.Val)	R	45	V	var	2	-0.197702	0.0429352	0.0712621	0.105948	-0.00767799	0.0883669	-0.411116	0.194029	0.171533	0.0136532	0.133302	0.10706	-0.320585	0.0341645	0.150595	0.0751903	-0.498147	0.507782
(p.Arg.45.Trp)	R	45	W	var	2	-0.188305	0.00572439	0.0109516	0.131989	-0.0517428	0.0302214	-0.887185	0.471999	0.0654782	0.075102	0.011177	0.222069	-0.3569	0.297828	0.0382243	0.00513854	-1.16481	0.843088
(p.Arg.45.Tyr)	R	45	Y	var	2	0.0863224	0.0391468	0.140351	0.0342649	-0.153957	0.839544	-0.693184	1.21404	0.36958	0.276611	0.205418	0.26218	-0.138954	0.331788	0.425343	0.00183647	-0.883974	0.0604001
(p.Leu.46.Ter)	L	46	*	var	2	-8.11882	1.2111	-5.72912	0.94345	-0.421571	0.43687	-8.652	0.437928	-5.11134	0.25943	-0.993965	1.21076	-3.91833	0.10748	-3.24316	0.156931	-4.58761	0.0273535
(p.Leu.46.Ala)	L	46	A	var	2	-4.87026	0.0427581	0.0252967	0.0461256	-0.0298938	0.0614215	-4.95348	1.06298	-1.27834	1.23189	0.0608208	0.0989871	-3.48565	0.0432535	-0.677066	0.720933	-4.35391	0.374925
(p.Leu.46.Cys)	L	46	C	var	2	-7.23549	1.47531	-2.52125	0.130232	-0.0575156	0.0610431	-7.28861	1.55498	-3.92923	1.41942	0.083353	0.282433	-3.46519	0.121493	-3.2948	0.206796	-4.33876	0.144957
(p.Leu.46.Asp)	L	46	D	var	2	-4.77207	0.0673561	-3.50347	0.0137813	-0.0330728	0.141827	-5.53871	0.0696956	-3.85396	0.89422	-1.0736	0.830681	-3.67267	0.0340911	-2.59896	0.114343	-4.64625	0.503068
(p.Leu.46.Glu)	L	46	E	var	2	-7.48843	1.16338	-3.99949	0.455127	0.0362082	0.144342	-7.66027	0.861094	-4.58549	0.274309	-0.770279	0.789091	-4.0831	0.0285931	-3.57823	0.00967213	-4.64567	0.324047
(p.Leu.46.Gly)	L	46	G	var	2	-5.4282	0.0123477	-4.01762	0.132284	0.0346449	0.0436875	-6.28283	0.578189	-4.13761	0.00949789	-0.741334	0.882606	-3.60166	0.0879272	-3.07676	0.143298	-4.14401	0.304896
(p.Leu.46.His)	L	46	H	var	2	-3.52951	1.12813	-3.01428	0.666024	-0.0355778	0.571206	-3.6742	0.281953	-3.01098	0.49148	-0.407115	0.363954	-3.49348	0.69378	-2.85722	0.197073	-3.17646	0.296504
(p.Leu.46.Ile)	L	46	I	var	2	0.075282	0.206056	-0.126101	0.020178	0.006574	0.138968	0.0928544	0.0480486	-0.0179834	0.0711441	-0.0879675	0.273288	0.0404647	0.107189	0.0351528	0.200479	0.158455	0.48661
(p.Leu.46.Lys)	L	46	K	var	2	-4.51612	0.128996	-3.21959	0.00732665	0.194885	0.400331	-5.76922	0.913199	-4.24355	0.687886	-0.608469	0.646573	-3.90001	0.27801	-3.34713	0.0237718	-4.49399	0.613064
(p.46.=)	L	46	L	syn	2	0.0109733	0.0931676	0.0595042	0.105891	0.0962589	0.0965627	-0.0402381	0.0543232	-0.115934	0.0402787	-0.0772126	0.0190276	0.00855357	0.0843175	-0.0580518	0.00796549	-0.240764	0.150228
(p.Leu.46.Met)	L	46	M	var	2	0.563863	0.0689242	0.0292198	0.172726	0.0308623	0.0163372	-0.765979	1.17061	0.176924	0.0718585	0.048427	0.0593848	0.304754	0.327198	0.29375	0.136758	-0.76336	0.982008
(p.Leu.46.Asn)	L	46	N	var	2	-6.2509	0.123283	-4.00596	0.44658	0.147375	0.482785	-6.4394	0.423187	-5.77618	0.119963	-0.468836	0.418657	-3.51276	0.921886	-4.69152	0.230561	-4.33046	0.474837
(p.Leu.46.Pro)	L	46	P	var	2	-1.86913	0.237786	-1.61265	0.0829561	0.0321865	0.141945	-2.1551	0.232175	-1.76087	0.197947	-0.401079	0.228085	-1.94831	0.325607	-1.61101	0.108717	-2.02954	0.536402
(p.Leu.46.Gln)	L	46	Q	var	2	-3.37557	0.76966	-2.6253	0.23052	-0.0779119	0.0283144	-6.09015	3.0908	-3.24538	0.0922039	-0.0387421	0.344773	-3.44968	0.0711953	-2.51882	0.368622	-3.20688	0.0817042
(p.Leu.46.Arg)	L	46	R	var	2	-5.52056	0.146573	-4.45995	0.394848	0.0545661	0.0572735	-5.84638	0.599394	-4.45984	0.295942	-0.535257	0.697247	-3.58325	0.159744	-3.31552	0.100089	-3.91884	0.0448899
(p.Leu.46.Ser)	L	46	S	var	2	-6.19234	1.12219	-0.715914	0.247428	0.0563735	0.0951897	-6.99274	0.135546	-4.28579	0.933095	0.0725923	0.0604773	-3.79421	0.312177	-2.95371	0.306744	-4.64683	0.519911
(p.Leu.46.Thr)	L	46	T	var	2	-0.402818	0.0552229	-0.0587325	0.109145	0.0815248	0.198766	-2.04803	0.947899	0.218828	0.113486	0.169444	0.131283	-1.15413	0.656311	0.0533621	0.163874	-2.21221	1.82424
(p.Leu.46.Val)	L	46	V	var	2	0.152786	0.0868534	0.0236261	0.0395989	0.0581369	0.0219767	0.373497	0.05506	0.0490492	0.0224989	0.00075875	0.0159782	0.33062	0.105302	0.0440327	0.0120368	0.0651811	0.079004
(p.Leu.46.Trp)	L	46	W	var	2	-6.15637	0.629558	-3.51213	0.0929807	-0.0188676	0.12387	-6.89068	1.00131	-4.1425	0.00902338	-0.625188	0.742049	-3.78358	0.227615	-3.39276	0.068259	-4.45716	0.301968
(p.Leu.46.Tyr)	L	46	Y	var	2	-5.98894	0.205959	-5.69745	0.254708	0.0729961	0.0634968	-6.77342	0.0895905	-5.6102	0.314292	-0.396398	0.373289	-4.43174	0.418153	-4.31802	0.329707	-5.45696	1.0828
(p.Tyr.47.Ter)	Y	47	*	var	2	-3.12442	0.166615	-2.62076	0.141586	-0.330303	0.155809	-3.9808	0.568686	-2.7348	0.221804	-0.816578	0.907627	-2.82901	0.140635	-2.06478	0.136394	-3.15984	0.447244
(p.Tyr.47.Ala)	Y	47	A	var	2	0.684099	0.113871	-0.0396265	0.02163	-0.101178	0.0102006	0.520321	0.133103	0.0882421	0.0261239	0.0360329	0.103178	0.719154	0.00651679	0.102816	0.00951481	0.209168	0.0923583
(p.Tyr.47.Cys)	Y	47	C	var	2	-1.73502	0.0367931	0.156441	0.0624692	0.0432699	0.0495918	-2.51756	0.380013	0.118592	0.0732198	-0.00380133	0.0869517	-2.05093	0.0531342	0.0776208	0.0383145	-2.34324	0.873703
(p.Tyr.47.Asp)	Y	47	D	var	2	0.498051	0.100182	0.0559916	0.119673	0.0209454	0.033504	-2.60975	0.639527	0.100982	0.0898252	-0.00391953	0.0920134	-1.37095	0.855822	0.0905427	0.0206111	-1.93404	1.6164
(p.Tyr.47.Glu)	Y	47	E	var	2	0.635096	0.0652291	0.00183046	0.039616	-0.0536679	0.0875832	-1.32458	1.37952	0.0581933	0.111105	0.0193817	0.104953	0.232947	0.301411	0.00745748	0.141862	-0.853679	1.05417
(p.Tyr.47.Phe)	Y	47	F	var	2	0.0135679	0.0221059	0.0681735	0.0521248	-0.0564704	0.00822685	0.298452	0.0727774	0.0875393	0.0219483	0.0293185	0.0964255	0.319315	0.00198121	0.104608	0.175439	0.509099	0.131116
(p.Tyr.47.Gly)	Y	47	G	var	2	-0.137239	0.0992633	0.0405219	0.00604439	0.0873867	0.0350707	-2.60594	0.792709	0.0767672	0.0648052	-0.0443516	0.0408453	-1.82755	0.432465	0.0621153	0.0682656	-2.39231	1.12307
(p.Tyr.47.His)	Y	47	H	var	2	0.150621	0.15366	0.102683	0.141466	0.01956	0.193908	0.113277	0.117689	-0.0319584	0.120176	-0.215396	0.0855071	-0.0468922	0.0854357	-0.0895155	0.0343946	0.373874	0.540774
(p.Tyr.47.Ile)	Y	47	I	var	2	0.914761	0.26886	0.0522528	0.193326	0.0432018	0.441127	1.19619	0.371237	0.069659	0.0988522	0.0429822	0.117482	1.402	0.203211	0.046041	0.133298	1.33098	0.73967
(p.Tyr.47.Lys)	Y	47	K	var	2	0.142607	0.0546511	-0.148884	0.0515065	-0.0869716	0.109671	-0.468127	0.561742	0.115839	0.150717	-0.0505998	0.0571596	0.0449412	0.183536	-0.0143042	0.00671536	-0.0332174	0.295694
(p.Tyr.47.Leu)	Y	47	L	var	2	0.569538	0.0696308	-0.136451	0.0766645	-0.0274855	0.0473964	0.242274	0.29191	-0.0329344	0.0394101	0.037762	0.059955	0.782067	0.0226557	0.0365118	0.0902628	0.448035	0.141789
(p.Tyr.47.Met)	Y	47	M	var	2	0.78211	0.220457	-0.126739	0.0973426	-0.201242	0.0778163	1.08255	0.57352	-0.0418744	0.138181	-0.0448897	0.436409	1.34929	0.334143	-0.0238545	0.179995	1.18749	0.934715
(p.Tyr.47.Asn)	Y	47	N	var	2	0.693051	0.171928	0.112715	0.0941368	-0.0284182	0.0549669	-0.259069	0.699943	0.0328464	0.0781438	-0.0118051	0.0146708	0.64766	0.0884997	-0.0017006	0.107785	-0.0536357	0.362679
(p.Tyr.47.Pro)	Y	47	P	var	2	-3.0569	0.159942	-0.0282376	0.166701	0.00158951	0.0301056	-4.38969	1.1232	-0.550327	0.783925	-0.0112129	0.159339	-3.10536	0.0861815	-0.214469	0.406825	-3.2026	0.698417
(p.Tyr.47.Gln)	Y	47	Q	var	2	0.63122	0.219782	0.0654935	0.193276	0.204363	0.0272439	0.125259	0.117857	0.00781997	0.0861385	-0.0326968	0.0885144	0.631993	0.0280905	-0.0336376	0.0848249	0.140514	0.142061
(p.Tyr.47.Arg)	Y	47	R	var	2	0.118807	0.0410251	-0.0258632	0.000406783	-0.0858016	0.0992866	-0.947726	0.773731	-0.00378864	0.0972206	-0.036807	0.0551733	-0.132019	0.197182	0.00507353	0.0299302	-0.104196	0.281278
(p.Tyr.47.Ser)	Y	47	S	var	2	0.475302	0.100869	-0.0307185	0.084999	0.0360298	0.00330886	-0.339202	0.576805	0.0572906	0.0579114	-0.0415409	0.152707	0.418758	0.0512575	0.125301	0.0523454	-0.355105	0.495607
(p.Tyr.47.Thr)	Y	47	T	var	2	0.885728	0.151114	0.0459596	0.00187906	-0.0211482	0.168469	-1.16573	1.54125	-0.0441302	0.0128571	0.0124419	0.127349	0.477526	0.277899	0.0192864	0.00621142	-0.801375	1.09939
(p.Tyr.47.Val)	Y	47	V	var	2	0.960779	0.135789	0.0627056	0.0476805	0.0171899	0.105926	1.27366	0.402507	0.018547	0.083599	0.0101868	0.00640072	1.40392	0.0663018	0.0376774	0.00140939	1.4604	0.8312
(p.Tyr.47.Trp)	Y	47	W	var	2	0.225371	0.0464874	-0.0389992	0.0288776	-0.0908575	0.14567	0.51663	0.123111	0.0667697	0.0439483	0.00221154	0.12091	0.61258	0.0649413	0.0195042	0.19508	0.597646	0.166199
(p.47.=)	Y	47	Y	syn	2	-0.219816	0.0158714	0.117115	0.152161	0.0599121	0.268622	-0.136807	0.153272	0.245306	0.128786	0.141152	0.200693	-0.125002	0.067644	0.147008	0.0119147	-0.143319	0.0706901
(p.Gln.48.Ter)	Q	48	*	var	2	-4.52147	0.311205	-3.42044	0.232233	-0.128643	0.0584372	-4.5007	0.303498	-3.48486	0.133838	-0.202114	0.318645	-3.2206	0.0620136	-2.5375	0.0818132	-3.76885	0.0163249
(p.Gln.48.Ala)	Q	48	A	var	2	-0.197847	0.0101663	0.0553413	0.0597784	0.0652056	0.0569255	-0.0523066	0.156586	0.124478	0.0983193	0.0128671	0.0662421	0.0327312	0.0425994	0.10954	0.0347807	-0.0163268	0.0464604
(p.Gln.48.Cys)	Q	48	C	var	2	-2.49188	0.234039	-0.0491781	0.0457929	-0.102941	0.0289756	-2.1663	0.415769	0.157883	0.00506207	-0.0849048	0.0651106	-1.93324	0.490041	0.123842	0.133786	-2.24713	1.30623
(p.Gln.48.Asp)	Q	48	D	var	2	0.160776	0.0573064	0.117049	0.0698859	0.0109872	0.217406	-0.298709	0.404562	-0.0672254	0.241816	-0.108894	0.0875045	0.0687722	0.148096	-0.013227	0.108742	-0.431799	0.393441
(p.Gln.48.Glu)	Q	48	E	var	2	0.0880409	0.0787356	0.052039	0.036489	-0.0860518	0.0214805	0.0282354	0.00106983	-0.0536481	0.0498374	-0.0761027	0.0613622	0.0227601	0.0423065	-0.0952326	0.123273	0.0390486	0.0566613
(p.Gln.48.Phe)	Q	48	F	var	2	-0.213498	0.375524	0.122503	0.0488741	0.163884	0.19961	-0.7049	0.420284	0.0678849	0.165448	-0.00571973	0.0584996	-0.501728	0.121823	0.040126	0.0518961	-0.589442	0.73258
(p.Gln.48.Gly)	Q	48	G	var	2	-0.138775	0.00783097	0.0301015	0.0120562	0.0053727	0.149629	-0.110355	0.0695451	0.111008	0.044036	0.00794963	0.0667204	0.0787397	0.0550815	0.0981618	0.0765266	-0.141277	0.203273
(p.Gln.48.His)	Q	48	H	var	2	-0.191499	0.306355	-0.206771	0.0814401	-0.0486453	0.0906612	0.193701	0.230933	0.309847	0.212851	-0.0134677	0.625028	0.125228	0.263281	0.160445	0.0544973	-0.0673775	0.421985
(p.Gln.48.Ile)	Q	48	I	var	2	0.0375301	0.00687004	0.0823391	0.47078	-0.0101733	0.139146	-1.43149	1.03841	-0.778646	0.292365	-0.554286	0.551388	-0.487498	0.774751	-0.517316	0.4224	-1.35774	0.0594177
(p.Gln.48.Lys)	Q	48	K	var	2	-0.0987569	0.124568	-0.0406827	0.0578072	-0.0267901	0.0454687	0.196306	0.0916036	0.227951	0.0153063	0.0798901	0.246564	0.166907	0.183487	0.110936	0.206829	0.396465	0.147562
(p.Gln.48.Leu)	Q	48	L	var	2	-0.289698	0.219459	0.0477855	0.0756164	0.0600109	0.00854966	-0.449169	0.210488	0.117762	0.0860338	0.00200739	0.106062	-0.226716	0.081862	0.103572	0.0138253	-0.251981	0.205072
(p.Gln.48.Met)	Q	48	M	var	2	0.224663	0.120976	0.0310168	0.0247867	-0.103405	0.25963	0.198306	0.146653	0.0791238	0.146439	-0.0310388	0.0633307	0.213082	0.0747364	-0.0387839	0.22862	0.0955592	0.104061
(p.Gln.48.Asn)	Q	48	N	var	2	0.0121306	0.785006	0.367452	0.328853	-0.00300713	0.38374	0.150422	0.329043	0.0312502	0.236441	-0.316816	0.0599595	-0.19801	0.479822	-0.0239976	0.045649	0.0845212	0.312883
(p.Gln.48.Pro)	Q	48	P	var	2	0.194536	0.0990961	0.115845	0.0712993	-0.0366122	0.0314493	0.383224	0.0896217	0.18722	0.118427	-0.145236	0.407263	0.362934	0.113261	0.112364	0.124751	0.39849	0.266947
(p.Gln.48.Arg)	Q	48	R	var	2	0.136994	0.0439883	0.0658289	0.00754683	0.0153745	0.00147671	0.372482	0.0912687	0.0284927	0.0505861	0.044929	0.123469	0.317598	0.14542	0.134427	0.00338559	0.349142	0.168161
(p.Gln.48.Ser)	Q	48	S	var	2	-0.357548	0.152402	0.00866347	0.0383592	-0.0116148	0.185779	-0.262453	0.328701	0.170384	0.321665	0.0805703	0.0444346	-0.196631	0.401259	0.124653	0.188842	-0.257288	0.620523
(p.Gln.48.Thr)	Q	48	T	var	2	-0.384385	0.0146459	0.00638916	0.0179118	0.0219625	0.122787	-0.319886	0.1318	0.119002	0.0740045	0.0632991	0.221097	-0.193796	0.0887888	0.0973212	0.0701454	-0.212217	0.477644
(p.Gln.48.Val)	Q	48	V	var	2	0.0887563	0.172024	0.120425	0.025457	0.0713442	0.0538956	-0.21443	0.363085	0.102109	0.0729947	-0.0150051	0.0222636	0.100942	0.0921724	0.0974205	0.0659349	-0.107058	0.167863
(p.Gln.48.Trp)	Q	48	W	var	2	-0.218593	0.0306748	0.0669788	0.0149311	0.112148	0.0249416	-0.462684	0.272609	-0.00379898	0.144204	-0.0343685	0.0545055	-0.207687	0.00145964	0.0195818	0.141998	-0.210678	0.317066
(p.Gln.48.Tyr)	Q	48	Y	var	2	0.520501	0.294294	0.0273803	0.410435	-0.174681	0.198635	0.333771	0.28414	-0.031301	0.819795	-0.0412884	0.590379	0.674657	0.371271	-0.169618	0.253503	-0.0706222	0.131664
(p.Ile.49.Ter)	I	49	*	var	2	-9.8627	0.00421255	-4.96404	0.253456	-0.164864	0.000982716	-8.61825	1.03059	-4.55539	0.184454	-0.569431	0.384343	-4.0551	0.257141	-3.47357	0.139278	-4.96558	0.436978
(p.Ile.49.Ala)	I	49	A	var	2	-3.78848	0.0387162	0.0389834	0.0363686	0.0651699	0.0324489	-3.72129	0.900413	0.0865654	0.110223	0.0391	0.0166515	-3.29447	0.119437	0.150897	0.0108021	-3.39984	1.13859
(p.Ile.49.Cys)	I	49	C	var	2	-8.66886	1.17138	-3.84972	0.201486	-0.176278	0.124615	-6.45045	0.704861	-4.14717	0.503536	0.104276	0.194378	-3.71235	0.0936221	-3.16307	0.0526326	-4.28449	0.481417
(p.Ile.49.Asp)	I	49	D	var	2	-6.63362	0.22235	-3.26623	0.421128	0.0380339	0.00602963	-7.49529	0.274983	-3.60072	0.115115	-0.146391	0.0455004	-3.84214	0.179548	-3.07966	0.00428142	-4.68487	0.04523
(p.Ile.49.Glu)	I	49	E	var	2	-5.42448	0.211744	-0.395327	0.280287	0.0757093	0.243728	-6.20661	0.523029	-3.1844	0.106489	0.0283874	0.034327	-3.35694	0.0136586	-2.51813	0.278494	-4.4158	0.496769
(p.Ile.49.Phe)	I	49	F	var	2	-1.49103	0.00192091	0.303421	0.0131729	0.302343	0.133481	-2.18683	0.210113	-0.237736	0.408678	-0.0111207	0.224671	-1.2634	0.18108	-0.0256074	0.15843	-1.58187	0.656212
(p.Ile.49.Gly)	I	49	G	var	2	-7.2039	0.0101102	-3.718	0.136887	0.0701454	0.0573208	-6.8843	0.55575	-3.94146	0.211991	-0.0350204	0.148123	-3.80468	0.016284	-3.15365	0.0356125	-4.43743	0.0965839
(p.Ile.49.His)	I	49	H	var	2	-0.817875	0.0916514	-0.0177624	0.186359	0.192221	0.0556647	-1.46668	0.924871	0.469623	0.37243	0.372905	0.339223	-0.697586	0.49197	0.329392	0.313284	-1.45789	1.66215
(p.49.=)	I	49	I	syn	2	-0.135095	0.0295432	0.0604702	0.00472208	-0.108424	0.0668421	-0.135687	0.248097	-0.00875861	0.0620528	-0.0248344	0.312738	-0.122724	0.169446	0.0412113	0.247788	-0.183117	0.496008
(p.Ile.49.Lys)	I	49	K	var	2	-5.94506	0.849021	-2.69425	0.217163	0.0515001	0.0066862	-5.9363	0.582117	-3.21198	0.0801467	0.0247221	0.0934249	-3.63542	0.275688	-2.5798	0.105081	-4.19584	0.567928
(p.Ile.49.Leu)	I	49	L	var	2	-0.979898	0.0686371	0.0341343	0.0347943	0.0821465	0.0511963	-0.829613	0.204864	0.0591057	0.0624466	-0.0754902	0.100444	-0.844243	0.000938248	0.0109912	0.0482291	-0.517148	0.354673
(p.Ile.49.Met)	I	49	M	var	2	-0.615113	0.139906	0.105598	0.111627	0.0678674	0.0119249	-0.911229	0.55258	0.0146169	0.0300679	0.043472	0.0977311	-0.650517	0.21607	-0.020892	0.132742	-0.778524	0.60986
(p.Ile.49.Asn)	I	49	N	var	2	-3.12836	0.220589	0.293566	0.027262	-0.0924053	0.0395459	-3.53171	1.16997	-1.15791	1.33635	0.0929657	0.0295429	-2.9802	0.283852	-0.390596	0.51104	-3.99344	1.24182
(p.Ile.49.Pro)	I	49	P	var	2	-5.47571	0.284188	-0.678688	0.220361	-0.197426	0.416518	-5.01301	0.410475	-2.48722	0.227405	0.154624	0.304784	-3.23275	0.0255705	-1.76267	0.566843	-3.56872	1.25089
(p.Ile.49.Gln)	I	49	Q	var	2	-3.68344	0.0368594	-0.0357664	0.143605	0.0850554	0.0477112	-4.24279	1.25259	-0.320724	0.390521	0.0313339	0.277893	-3.25376	0.0251764	-0.016564	0.0440918	-3.89702	0.348641
(p.Ile.49.Arg)	I	49	R	var	2	-6.35857	0.0430276	-2.63829	0.342185	0.0823988	0.0436987	-6.48265	0.628696	-3.68834	0.0188326	0.0608403	0.00636877	-3.65379	0.0382225	-2.8634	0.00114014	-4.29976	0.152124
(p.Ile.49.Ser)	I	49	S	var	2	-5.73615	0.0536824	-0.173412	0.144369	0.093462	0.0132676	-5.57946	0.169822	-3.22607	0.110301	0.105562	0.03855	-3.41992	0.095619	-2.25864	0.421248	-4.05446	0.0883479
(p.Ile.49.Thr)	I	49	T	var	2	-2.74678	0.134373	0.00442639	0.0298499	0.0142592	0.104594	-3.18917	0.584989	0.0327514	0.189325	0.0335502	0.0440036	-2.58303	0.405617	0.143779	0.0919947	-2.98057	1.00671
(p.Ile.49.Val)	I	49	V	var	2	0.0166353	0.0454763	0.0181796	0.00169574	-0.00892864	0.0827897	0.147316	0.00475248	0.0143301	0.10851	0.0049505	0.0874277	0.124056	0.0399898	0.0409177	0.0467117	0.00621295	0.050868
(p.Ile.49.Trp)	I	49	W	var	2	-2.89483	0.0403863	0.0660979	0.0504157	0.13484	0.0674947	-2.62775	0.632791	0.19424	0.225075	0.128185	0.0380445	-1.92403	0.0665972	0.207209	0.0667965	-1.19406	0.788801
(p.Ile.49.Tyr)	I	49	Y	var	2	-3.71927	0.458436	0.00354979	0.0800426	0.0767417	0.169964	-4.87277	0.208798	-0.159958	0.132927	-0.249617	0.300789	-3.71787	0.495005	-0.077958	0.081706	-3.82659	0.998947
(p.Ala.50.Ter)	A	50	*	var	2	-6.65551	0.363	-3.89158	0.0581436	-0.153221	0.0241009	-6.62433	0.0830638	-3.62171	0.526584	-0.486529	0.73046	-3.71069	0.235784	-2.786	0.0184475	-4.43095	0.436124
(p.50.=)	A	50	A	syn	2	0.161455	0.0959797	-0.0235657	0.0456977	0.0776071	0.127309	0.314509	0.251701	-0.0053963	0.120402	0.0758858	0.0489589	0.320746	0.294559	0.0642144	0.026853	0.177467	0.187562
(p.Ala.50.Cys)	A	50	C	var	2	-3.99698	0.50253	0.138338	0.0954152	0.0326976	0.217506	-3.63699	0.86562	0.038085	0.050416	-0.0647467	0.0208738	-3.14777	0.267637	-0.041402	0.0429785	-3.19686	1.44155
(p.Ala.50.Asp)	A	50	D	var	2	-0.262547	0.141617	-0.0350845	0.0307836	-0.111479	0.00053832	-0.515612	0.423581	0.202146	0.265575	0.0702352	0.0752572	-0.310642	0.185763	0.179272	0.0749197	-0.334617	0.599576
(p.Ala.50.Glu)	A	50	E	var	2	-0.364872	0.170918	0.0446524	0.0675138	0.0296441	0.0265365	-0.797917	0.395689	0.104172	0.129977	0.014354	0.119871	-0.431526	0.00797621	0.092929	0.130661	-0.653249	0.470842
(p.Ala.50.Phe)	A	50	F	var	2	-1.68835	0.168168	0.00546043	0.0790987	0.0856202	0.116649	-2.44607	1.30363	0.222898	0.270165	0.0970935	0.187468	-1.87132	0.058516	0.0798532	0.296816	-2.09681	1.25574
(p.Ala.50.Gly)	A	50	G	var	2	-0.474583	0.127365	0.0230008	0.0105302	0.00669204	0.0487395	-0.897122	0.375745	0.151514	0.0315092	0.0520271	0.0783898	-0.603763	0.0259858	0.0862225	0.0701985	-0.550485	0.405569
(p.Ala.50.His)	A	50	H	var	2	-0.721633	0.0223837	0.315569	0.379108	0.0908509	0.115162	-2.28147	0.556578	-0.183224	0.0755965	-0.15164	0.236077	-1.09879	0.408042	-0.152662	0.0695463	-1.40486	1.10692
(p.Ala.50.Ile)	A	50	I	var	2	-1.73516	0.0119406	0.176593	0.0867248	0.0807577	0.0757871	-2.85391	0.729851	0.316164	0.211482	0.0163031	0.0779931	-1.95988	0.160717	0.20877	0.017264	-2.26692	1.40167
(p.Ala.50.Lys)	A	50	K	var	2	-2.31686	0.471355	-0.0826226	0.160471	-0.0269292	0.00900921	-2.82295	0.913514	-0.0803043	0.0943121	-0.183953	0.044067	-1.90406	0.0371059	-0.145107	0.0356124	-1.86949	0.939745
(p.Ala.50.Leu)	A	50	L	var	2	-3.23978	0.0454908	0.0487195	0.0138598	-0.000310992	0.101006	-3.84524	0.886667	0.231438	0.12721	0.100982	0.121543	-2.92474	0.200232	0.140088	0.110045	-2.67679	1.23744
(p.Ala.50.Met)	A	50	M	var	2	-2.39457	0.111025	-0.30373	0.0352808	-0.178903	0.114912	-2.57968	1.14334	0.223521	0.323155	0.103568	0.501821	-1.74199	0.349637	0.155202	0.330443	-1.69678	1.70259
(p.Ala.50.Asn)	A	50	N	var	2	-0.472026	0.121171	0.138826	0.0566665	0.250863	0.0752843	-0.628452	0.605713	0.352965	0.165536	0.252271	0.156683	-0.427897	0.0695841	0.227585	0.0221635	-0.483685	0.273304
(p.Ala.50.Pro)	A	50	P	var	2	-5.07619	0.864742	-4.54198	1.39674	-0.0696722	0.0912198	-5.3169	0.778164	-4.3612	0.374469	-0.232358	0.439183	-3.55122	0.0518276	-2.70779	0.418858	-3.047	0.328386
(p.Ala.50.Gln)	A	50	Q	var	2	-0.991477	0.479642	0.0496379	0.0521063	0.206705	0.0687641	-1.96164	0.74077	-0.107221	0.243196	-0.0241448	0.0941587	-1.45626	0.00860367	0.261255	0.273926	-1.26754	0.851531
(p.Ala.50.Arg)	A	50	R	var	2	-1.37988	0.162372	-0.0620455	0.0730016	-0.0727218	0.0996231	-1.91352	0.676733	0.0316166	0.0596592	-0.0428525	0.0335559	-1.36941	0.116666	-0.0149214	0.0927784	-1.38802	0.762951
(p.Ala.50.Ser)	A	50	S	var	2	-0.546159	0.038085	0.0268591	0.0414676	0.0515189	0.0844805	-0.537368	0.319665	0.172698	0.10387	0.0148834	0.0373927	-0.337783	0.0705322	0.145376	0.0786516	-0.355859	0.251266
(p.Ala.50.Thr)	A	50	T	var	2	-0.228569	0.219638	-0.214964	0.210367	-0.133797	0.0949959	0.0632557	0.113596	0.00207926	0.0496299	-0.0834441	0.200757	0.0776366	0.0765494	-0.0206473	0.107802	-0.365349	0.470175
(p.Ala.50.Val)	A	50	V	var	2	0.241086	0.204728	0.00414999	0.0757058	0.0790543	0.126405	0.275278	0.046199	0.0119689	0.136217	-0.00855934	0.00500369	0.353936	0.0249359	0.0307184	0.0256565	0.051004	0.0612544
(p.Ala.50.Trp)	A	50	W	var	2	-0.991295	0.0366274	0.0372593	0.0300308	0.07946	0.126443	-2.13251	0.916897	0.0243497	0.0843938	0.0356863	0.0683973	-1.23305	0.315205	0.0146283	0.0200442	-1.64064	1.2806
(p.Ala.50.Tyr)	A	50	Y	var	2	-0.895198	0.0225229	0.334367	0.253378	0.135936	0.169336	-1.36155	1.15103	0.33959	0.241295	0.286676	0.0625856	-0.863801	0.314542	0.355591	0.0393304	-0.83978	0.556075
(p.Asp.51.Ter)	D	51	*	var	2	-4.73015	0.838781	-2.62139	0.17184	-0.0635732	0.0871063	-5.34999	0.066673	-3.00361	0.325965	-0.137428	0.404372	-3.52232	0.0702702	-2.39253	0.136218	-3.11272	0.572252
(p.Asp.51.Ala)	D	51	A	var	2	0.0753687	0.0646281	0.0458519	0.12994	0.00170546	0.0409621	0.0147865	0.018001	0.0185281	0.0437966	-0.07725	0.15135	0.026123	0.0058173	-0.0106939	0.146596	-0.0367228	0.0273525
(p.Asp.51.Cys)	D	51	C	var	2	-4.27979	0.0155283	-2.31409	0.316444	-0.0728303	0.495978	-3.6964	0.241476	-2.48475	0.0836125	-0.230373	0.0188985	-2.51568	0.342401	-1.65826	0.368127	-2.56122	0.360026
(p.51.=)	D	51	D	syn	2	0.0389961	0.0110809	-0.0629184	0.107614	0.0390305	0.153976	0.0697182	0.00877999	-0.034442	0.0801524	-0.0187205	0.0327428	-0.00603549	0.0294572	0.0310166	0.181514	-0.139816	0.0837767
(p.Asp.51.Glu)	D	51	E	var	2	0.201685	0.0684383	-0.00893781	0.105409	-0.0445048	0.115988	0.227929	0.0642084	-0.00322075	0.0256891	-0.0519101	0.0981701	0.177768	0.0471414	-0.00380707	0.104681	0.184603	0.100337
(p.Asp.51.Phe)	D	51	F	var	2	-0.0526897	0.0737393	-0.0111544	0.261025	-0.339214	0.322327	-0.64137	1.10648	0.0488472	0.6586	-0.284852	0.594539	-0.30214	0.674905	-0.192108	0.617369	-0.94611	0.845537
(p.Asp.51.Gly)	D	51	G	var	2	-0.11484	0.0161726	0.0583511	0.00114433	0.0161356	0.00459829	-0.433172	0.253732	0.0507416	0.00534728	-0.0191192	0.0781579	-0.0627101	0.0644347	0.0399992	0.070177	-0.350613	0.265836
(p.Asp.51.His)	D	51	H	var	2	-0.222547	0.0661546	-0.0347421	0.255557	-0.324423	0.110623	-0.585545	1.05947	-0.16123	0.240858	-0.25109	0.110718	-0.672026	0.319859	-0.318009	0.0255226	-0.788434	0.492601
(p.Asp.51.Ile)	D	51	I	var	2	-0.548395	0.326486	-0.14234	0.0210597	-0.175095	0.188907	-1.30083	1.15158	-0.318938	0.187639	-0.259334	0.103114	-0.63473	0.154172	-0.320324	0.00738885	-0.329383	0.253127
(p.Asp.51.Lys)	D	51	K	var	2	-0.146425	0.238863	0.182305	0.0487387	0.0185219	0.210389	-0.329516	0.274603	-0.019076	0.11603	-0.0740198	0.000145397	-0.069377	0.0729376	-0.00169889	0.0580512	-0.180039	0.153445
(p.Asp.51.Leu)	D	51	L	var	2	-0.195474	0.101904	-0.0105988	0.0237222	0.0611994	0.201085	-0.686387	0.696584	0.0979795	0.160512	-0.024068	0.165981	-0.407679	0.477177	0.0516116	0.249437	-0.34923	0.61811
(p.Asp.51.Met)	D	51	M	var	2	-0.41526	0.265168	0.0524812	0.374694	0.100506	0.156663	-1.11348	0.732468	0.190741	0.106658	0.171289	0.105816	-0.913938	0.0104033	0.0100427	0.0485893	-0.996141	0.866603
(p.Asp.51.Asn)	D	51	N	var	2	-0.0218273	0.321824	0.0328599	0.128364	0.0962358	0.274394	0.0254404	0.0121207	-0.0604209	0.0145432	-0.0267936	0.172044	0.167713	0.00353304	0.192098	0.0598921	0.212555	0.166382
(p.Asp.51.Pro)	D	51	P	var	2	-0.22123	0.0180946	-0.149128	0.0840061	-0.0235193	0.0470334	0.102293	0.111976	-0.0559169	0.178652	-0.012085	0.140791	0.0401246	0.330538	-0.0573423	0.289359	0.251315	0.0223476
(p.Asp.51.Gln)	D	51	Q	var	2	-0.0186356	0.0943417	0.0117893	0.0889645	0.118911	0.0519608	-0.425786	0.0567238	-0.143142	0.156282	-0.197626	0.389981	-0.510859	0.0941792	-0.205636	0.197382	-0.312999	0.147234
(p.Asp.51.Arg)	D	51	R	var	2	-0.173078	0.0911642	-0.0254669	0.0488158	-0.0133681	0.0820636	-0.373396	0.243901	0.00305225	0.0376608	-0.00880924	0.0702913	-0.266312	0.0407827	-0.00320021	0.0163178	-0.31784	0.15431
(p.Asp.51.Ser)	D	51	S	var	2	0.0147136	0.0788471	-0.0620971	0.013358	-0.0471633	0.176175	-0.0125833	0.0944464	0.057939	0.0211718	0.0301693	0.123823	-0.0914586	0.00331968	0.0354188	0.0610168	-0.116353	0.119646
(p.Asp.51.Thr)	D	51	T	var	2	0.0591795	0.205276	0.111092	0.114522	-0.0732754	0.24637	-0.0692363	0.173877	-0.0695667	0.161504	-0.119421	0.0515682	0.198305	0.0976148	0.0124229	0.0577369	-0.13813	0.161057
(p.Asp.51.Val)	D	51	V	var	2	0.0613599	0.0831207	0.0143483	0.00121389	0.0182507	0.02368	-0.233812	0.348332	0.0327256	0.0812416	-0.0469498	0.00219024	-0.111618	0.198582	0.0886195	0.0588905	-0.177691	0.160618
(p.Asp.51.Trp)	D	51	W	var	2	-0.516112	0.0420758	0.00140879	0.0128821	-0.0245941	0.017987	-1.30801	0.987041	0.114739	0.0107685	-0.0197879	0.0113376	-0.936026	0.220992	-0.155613	0.115542	-0.974569	0.67854
(p.Asp.51.Tyr)	D	51	Y	var	2	-0.383121	0.00106882	0.0287161	0.260881	-0.22332	0.183976	-0.837958	0.147189	-0.494353	0.0575324	-0.148855	0.410243	-0.570387	0.265036	-0.199197	0.367295	-0.723136	0.145012
(p.Gly.52.Ter)	G	52	*	var	2	-4.97027	0.201753	-2.47501	0.0135212	-0.183924	0.250637	-5.68038	0.951765	-2.72468	0.0375315	-0.440571	0.506874	-3.49929	0.246284	-2.27844	0.363607	-3.81495	0.827747
(p.Gly.52.Ala)	G	52	A	var	2	-0.371931	0.226182	0.0734423	0.095159	0.0695826	0.0665487	-1.01491	0.633487	0.116677	0.130008	0.0605433	0.00434031	-0.453871	0.243155	0.0356184	0.0429012	-0.912675	0.723772
(p.Gly.52.Cys)	G	52	C	var	2	-3.20823	0.246534	-0.424634	0.17832	-0.10805	0.174622	-3.90268	0.768879	-1.33727	0.934375	-0.0578349	0.249459	-2.60628	0.551623	-1.52897	0.443453	-3.15431	0.611825
(p.Gly.52.Asp)	G	52	D	var	2	0.234806	0.0644253	-0.127949	0.0174315	-0.168579	0.106458	0.726663	0.169937	0.175425	0.0124458	0.172698	0.0715199	0.576777	0.0992772	0.215753	0.0577169	0.541543	0.196942
(p.Gly.52.Glu)	G	52	E	var	2	-0.134118	0.112903	0.0918512	0.188994	0.0609463	0.141461	-0.565402	0.474085	0.113899	0.0142824	0.0405621	0.0520433	-0.205558	0.186012	0.162065	0.00733934	-0.54171	0.598405
(p.Gly.52.Phe)	G	52	F	var	2	-0.926496	0.0102561	0.107496	0.0449561	0.11181	0.00985851	-1.59452	0.346375	0.137813	0.167564	-0.0452766	0.0101011	-1.33609	0.481029	0.0556108	0.201693	-1.40551	0.740997
(p.52.=)	G	52	G	syn	2	0.334797	0.055907	0.0117893	0.0185937	-0.00565493	0.00280513	0.492928	0.123655	0.0638704	0.022984	0.000838674	0.0847806	0.477267	0.0746788	0.0543511	0.0552914	0.423042	0.18617
(p.Gly.52.His)	G	52	H	var	2	-0.382699	0.0173141	-0.0217106	0.148829	-0.0193443	0.232532	-0.948373	0.344183	-0.0651589	0.090795	0.22539	0.0663932	-0.613956	0.0478303	0.0631024	0.0508831	-0.846453	0.644847
(p.Gly.52.Ile)	G	52	I	var	2	-0.629518	0.0143231	0.0534146	0.167533	0.144304	0.0770813	-1.52158	0.655792	0.0864498	0.256054	-0.0715994	0.0331731	-0.914162	0.130983	0.104977	0.311666	-1.39072	0.576082
(p.Gly.52.Lys)	G	52	K	var	2	0.0335742	0.0828369	0.192727	0.0205207	0.0398094	0.195408	-0.907958	0.662314	-0.022622	0.0907357	-0.162454	0.118679	-0.493957	0.108265	-0.00617348	0.0546621	-1.2352	0.936338
(p.Gly.52.Leu)	G	52	L	var	2	-1.31383	0.0161057	-0.00639829	0.0226714	0.0338832	0.0708797	-2.61562	0.834359	0.141144	0.0121706	0.0133881	0.100333	-1.74938	0.413693	0.0863496	0.000785847	-2.1258	0.994055
(p.Gly.52.Met)	G	52	M	var	2	-0.578303	0.111067	0.0627361	0.249097	0.00472303	0.184859	-1.49371	0.930708	-0.0779388	0.0303169	-0.181197	0.0484891	-1.05884	0.243686	0.0502992	0.0231987	-1.3037	0.978741
(p.Gly.52.Asn)	G	52	N	var	2	0.00230823	0.16995	-0.0756826	0.00886743	0.0257439	0.0116372	-0.0454833	0.0369584	-0.041955	0.104156	-0.119825	0.197783	-0.0347118	0.108741	-0.0336671	0.0231061	-0.0623968	0.148114
(p.Gly.52.Pro)	G	52	P	var	2	-3.43956	0.210422	0.0505023	0.00141643	0.142328	0.183211	-3.45757	0.894477	-0.437656	0.72371	0.151573	0.100871	-2.9049	0.403594	-0.206303	0.290562	-3.52355	0.0198716
(p.Gly.52.Gln)	G	52	Q	var	2	-0.131466	0.251537	0.0208756	0.134734	0.0968381	0.110861	-0.203707	0.0111487	0.0833649	0.14337	-0.00145122	0.221952	0.103942	0.213891	0.0214963	0.155461	-0.362293	0.459772
(p.Gly.52.Arg)	G	52	R	var	2	-0.286137	0.0203114	-0.0408436	0.000509649	-0.00503142	0.0599705	-0.951978	0.501234	0.0394382	0.0299746	-0.0288031	0.0150276	-0.382324	0.224897	0.0671508	0.0470052	-0.776537	0.474646
(p.Gly.52.Ser)	G	52	S	var	2	-0.0346297	0.0441531	0.0442281	0.0175563	-0.0470703	0.00962683	-0.356195	0.297948	0.0932571	0.0233837	0.00238755	0.0258415	-0.0403434	0.119249	0.061758	0.0463479	-0.434021	0.305353
(p.Gly.52.Thr)	G	52	T	var	2	0.00727062	0.0450462	-0.150285	0.130642	-0.106823	0.0744329	0.181888	0.0441496	0.251073	0.250336	0.196724	0.207927	0.553051	0.131278	0.173259	0.205883	0.0946525	0.0743388
(p.Gly.52.Val)	G	52	V	var	2	-1.04988	0.187177	0.0751812	0.0249789	0.0353364	0.0238519	-2.03479	0.70305	0.183164	0.0982581	0.0498492	0.0678544	-1.23582	0.371343	0.153073	0.015677	-1.77278	1.03966
(p.Gly.52.Trp)	G	52	W	var	2	-2.21803	0.252495	0.0669956	0.00294581	0.043265	0.00315202	-2.77886	0.729199	0.108296	0.146633	0.0226293	0.0186611	-2.20827	0.342685	0.0799595	0.184336	-2.67731	0.953238
(p.Gly.52.Tyr)	G	52	Y	var	2	-1.30699	0.495512	-0.255133	0.0913313	-0.122681	0.161055	-2.32448	0.403848	-0.249871	0.353901	-0.104333	0.0864745	-1.62585	0.555644	-0.18714	0.276435	-1.89242	1.27952
(p.Val.53.Ter)	V	53	*	var	2	-6.91598	0.840033	-3.80255	0.181676	-0.427955	0.41933	-6.21356	0.847362	-3.5909	0.16297	-1.20931	1.14721	-3.90272	0.351493	-2.62845	0.0682214	-4.27144	0.422776
(p.Val.53.Ala)	V	53	A	var	2	-2.41587	0.20778	0.081638	0.0114032	-0.0101074	0.00934405	-3.30309	0.531067	0.0764821	0.0434169	-0.0188196	0.0294417	-2.76971	0.323381	0.109411	0.031132	-3.13804	1.08512
(p.Val.53.Cys)	V	53	C	var	2	-6.09821	0.459033	-0.180291	0.145743	0.000768242	0.160362	-4.87333	0.996516	-0.125737	0.117022	-0.0842101	0.0547905	-4.17387	0.214982	-0.43219	0.0981151	-3.99603	0.480259
(p.Val.53.Asp)	V	53	D	var	2	-4.55265	0.0911299	-3.85337	0.697635	-0.0858225	0.186348	-5.41532	0.253053	-3.94055	0.0846626	-1.14013	1.08786	-3.24127	0.255029	-3.08319	0.0490592	-3.98858	0.345571
(p.Val.53.Glu)	V	53	E	var	2	-6.6774	0.590133	-3.19516	0.0124026	0.117709	0.100677	-6.60363	0.0509804	-3.31664	0.15529	-0.596244	0.81838	-3.95693	0.15379	-2.68069	0.123969	-4.43793	0.145435
(p.Val.53.Phe)	V	53	F	var	2	-4.9335	0.30508	-1.33526	0.122923	0.258467	0.13465	-3.83741	0.691781	-3.03543	0.809913	-0.458284	0.123522	-3.76245	0.64315	-2.73428	0.1934	-3.63947	0.451484
(p.Val.53.Gly)	V	53	G	var	2	-5.75019	0.0818668	-3.71775	0.0357881	0.0654495	0.0235896	-6.24995	0.638727	-3.67402	0.3451	-0.642541	0.84443	-3.79609	0.076321	-3.0339	0.00170691	-4.475	0.287922
(p.Val.53.His)	V	53	H	var	2	-8.07758	0.0909956	-6.28608	0.846852	0.197929	0.0345118	-8.4034	0.443872	-5.78674	0.66176	-0.569244	0.851848	-3.97676	0.235464	-3.62607	0.65903	-5.23672	1.40444
(p.Val.53.Ile)	V	53	I	var	2	-1.0003	0.222025	-0.0254139	0.00918985	-0.0672316	0.10364	-1.37495	0.41179	0.163958	0.14542	0.151	0.21462	-0.989776	0.0330833	0.0742231	0.214429	-1.47007	0.819288
(p.Val.53.Lys)	V	53	K	var	2	-7.71295	0.311902	-1.80829	0.0320809	0.0804767	0.210297	-7.84751	2.19783	-2.50868	0.330832	-0.687907	0.624499	-4.08938	0.265569	-1.7174	0.128308	-4.60051	0.575237
(p.Val.53.Leu)	V	53	L	var	2	-2.39704	0.42049	-0.101618	0.228992	-0.0508757	0.276895	-3.19753	1.05099	-0.174893	0.0396231	-0.0943897	0.00253122	-2.38859	0.499583	-0.148489	0.0865666	-2.31056	1.47324
(p.Val.53.Met)	V	53	M	var	2	-4.43764	0.0760391	0.157111	0.16316	0.0123807	0.155448	-3.52839	0.73924	0.0824761	0.5395	0.13095	0.0359561	-3.19514	0.683884	0.245874	0.0600148	-3.56794	0.952879
(p.Val.53.Asn)	V	53	N	var	2	-7.46271	0.0487039	-4.02851	0.886215	0.258948	0.0264842	-6.21793	1.19966	-4.26223	0.4828	0.0677974	0.414196	-3.5758	0.7607	-3.37185	0.862309	-4.69395	1.25131
(p.Val.53.Pro)	V	53	P	var	2	-6.27807	0.404062	-4.26124	0.794133	-0.0991219	0.0773607	-6.99685	0.360955	-4.4901	0.564165	-0.919281	1.29137	-4.04192	0.0076185	-3.01663	0.491052	-4.6521	0.376156
(p.Val.53.Gln)	V	53	Q	var	2	-4.70996	0.151147	-2.98352	0.0170164	0.192363	0.111488	-6.53617	1.17058	-2.63997	0.206277	-0.303422	0.285162	-3.58639	0.349549	-2.72963	0.190369	-4.34227	0.300157
(p.Val.53.Arg)	V	53	R	var	2	-6.52057	0.551957	-4.09939	0.0168272	-0.101866	0.148934	-7.0602	0.914153	-3.94191	0.220455	-0.931762	1.05075	-3.84066	0.0521768	-3.16682	0.0847551	-4.59541	0.195604
(p.Val.53.Ser)	V	53	S	var	2	-5.2591	0.0685199	-0.262095	0.179278	0.0161642	0.106988	-5.75673	0.886939	-2.3118	0.689441	0.0283208	0.0666251	-3.52754	0.151005	-1.88347	0.688675	-3.90011	0.149949
(p.Val.53.Thr)	V	53	T	var	2	-2.01643	0.0791665	0.092915	0.0504431	-0.0129157	0.198568	-2.68176	0.789925	0.0934443	0.0558958	-0.031899	0.0679263	-1.95345	0.293951	0.0729	0.148378	-2.16348	0.942838
(p.53.=)	V	53	V	syn	2	0.0690041	0.0179527	0.0338548	0.0302257	0.0358497	0.0740602	0.0905706	0.0233976	-0.0150257	0.00908865	-0.078885	0.011619	0.10727	0.00898769	0.048838	0.0125239	0.0102432	0.0739306
(p.Val.53.Trp)	V	53	W	var	2	-5.45046	0.314285	-3.64324	0.0133894	0.110469	0.0183188	-6.74375	0.74161	-3.53532	0.159375	-0.718287	0.964291	-3.7671	0.043204	-2.91555	0.214578	-4.0796	0.164235
(p.Val.53.Tyr)	V	53	Y	var	2	-7.91946	0.107688	-5.46699	0.384075	0.207683	0.05743	-8.16123	0.175584	-4.75208	0.471984	-0.118446	0.3433	-4.39555	0.752603	-4.08186	0.817885	-6.05229	1.0545
(p.Trp.54.Ter)	W	54	*	var	2	-4.26072	0.0254824	-3.55219	0.276846	-0.291213	0.309876	-4.44148	0.181411	-3.68671	0.0573801	-0.770973	0.758818	-3.32068	0.404293	-3.02069	0.313446	-3.745	0.53203
(p.Trp.54.Ala)	W	54	A	var	2	-7.2917	0.870793	-4.38659	0.246574	0.0247241	0.00163159	-7.49483	0.342367	-5.13382	0.369407	-0.0538078	0.150884	-3.95601	0.0631422	-3.4361	0.378977	-4.69576	0.419938
(p.Trp.54.Cys)	W	54	C	var	2	-5.69504	1.14512	-4.94054	0.434437	-0.193398	0.31925	-5.3179	0.46632	-5.22598	1.1655	-0.499901	0.797606	-3.78729	0.199603	-3.33339	0.15008	-4.00676	0.472334
(p.Trp.54.Asp)	W	54	D	var	2	-8.78822	1.34804	-5.98554	0.152721	0.0523508	0.011058	-9.22355	0.834405	-5.89937	0.202885	-0.771573	1.1227	-3.82691	0.469734	-4.00637	0.00279942	-4.53188	0.0689584
(p.Trp.54.Glu)	W	54	E	var	2	-10.4649	0.136636	-6.04472	0.127076	-0.00481918	0.0505334	-9.35942	0.224546	-6.35529	0.13188	-0.739752	0.871438	-4.18673	0.378894	-3.62816	0.425168	-4.83403	0.305735
(p.Trp.54.Phe)	W	54	F	var	2	-2.59186	0.371131	0.15293	0.218937	0.230374	0.0779877	-3.39847	0.452296	0.287438	0.00667044	0.118837	0.0207186	-2.70167	0.808791	0.119865	0.0128633	-3.20598	1.44937
(p.Trp.54.Gly)	W	54	G	var	2	-7.68203	0.128345	-5.4923	0.321014	-0.0296387	0.0344133	-7.39702	0.158585	-5.56511	0.388912	-0.961786	1.11232	-4.0788	0.252119	-3.56764	0.188056	-4.6502	0.0235669
(p.Trp.54.His)	W	54	H	var	2	-6.33175	1.1969	-0.0562157	0.0423991	0.253725	0.0599035	-5.81093	2.12586	-0.999745	1.38216	0.133249	0.00484352	-3.39119	0.0418163	-0.824025	0.982884	-3.9447	0.420052
(p.Trp.54.Ile)	W	54	I	var	2	-8.45525	0.0745901	-0.846691	0.0189375	-0.0583481	0.224494	-7.6299	1.66564	-3.79675	0.775467	-0.01687	0.0175687	-5.1567	0.263127	-2.67732	0.846103	-5.24879	0.354255
(p.Trp.54.Lys)	W	54	K	var	2	-9.14395	0.645826	-5.23805	0.403506	0.0442917	0.107736	-9.91358	0.146965	-5.5542	0.000995883	-0.540033	0.705455	-4.18649	0.171835	-3.8023	0.32874	-4.79346	0.240843
(p.Trp.54.Leu)	W	54	L	var	2	-5.92297	0.592516	-1.23511	0.553355	-0.00227511	0.10389	-6.9858	0.258935	-3.75577	0.0363665	0.00629287	0.142525	-3.92099	0.154681	-2.68006	0.676842	-4.5807	0.284428
(p.Trp.54.Met)	W	54	M	var	2	-8.36898	0.868913	-0.582317	0.31846	-0.119524	0.100277	-7.99754	1.73029	-2.93064	0.583737	0.0315963	0.15256	-3.86563	0.0833356	-2.14513	1.02219	-4.6839	0.201933
(p.Trp.54.Asn)	W	54	N	var	2	-7.07039	2.04987	-5.22913	1.00662	0.113828	0.196996	-7.26515	1.96014	-3.67793	0.722173	-0.3793	0.520444	-3.31874	0.182572	-3.29745	0.319134	-4.65621	0.262459
(p.Trp.54.Pro)	W	54	P	var	2	-5.47473	0.240828	-4.87043	0.359959	-0.374089	0.0514905	-7.73668	1.80723	-4.8773	0.126893	-0.959202	0.894989	-3.49779	0.321225	-3.3554	0.014711	-4.31875	0.171001
(p.Trp.54.Gln)	W	54	Q	var	2	-8.9193	0.0644591	-4.33345	0.120242	-0.0210604	0.107162	-7.9486	1.01824	-4.85916	0.259743	0.037933	0.28391	-3.84514	0.352781	-3.33337	0.0634106	-4.90975	0.0693036
(p.Trp.54.Arg)	W	54	R	var	2	-5.88279	0.0723133	-4.68082	0.0202841	0.00577464	0.0300256	-6.42293	0.258848	-4.95956	0.0333235	-0.315347	0.536962	-3.92209	0.27628	-3.60442	0.11663	-4.12176	0.277248
(p.Trp.54.Ser)	W	54	S	var	2	-8.70357	2.32793	-4.70653	0.291889	-0.0315629	0.171591	-7.5543	0.0612321	-4.26104	0.352807	0.0269568	0.120845	-3.95646	0.145378	-3.48115	0.153658	-4.80442	0.0817306
(p.Trp.54.Thr)	W	54	T	var	2	-5.83265	0.583102	-2.22781	0.321985	0.0193163	0.182187	-8.90193	1.01665	-3.8722	0.478684	0.073937	0.0170973	-3.37709	0.11985	-3.04466	0.239841	-4.56327	0.156477
(p.Trp.54.Val)	W	54	V	var	2	-6.45774	0.643969	-1.48004	0.55229	-0.0859509	0.0109465	-6.54337	0.145656	-4.09938	0.0656435	0.125779	0.0380201	-3.75991	0.173456	-2.93919	0.435562	-4.53939	0.0488685
(p.Trp.54.Tyr)	W	54	Y	var	2	-1.41381	0.10235	0.0695342	0.0763383	-0.0686015	0.106102	-2.12903	0.347813	0.144597	0.193803	-0.114004	0.302423	-1.82688	0.418613	-0.0902749	0.168955	-2.13262	1.06758
(p.Ser.55.Ter)	S	55	*	var	2	-2.51274	0.107099	-2.55113	0.0843401	-0.102099	0.0351112	-2.84089	0.0933611	-3.27191	0.0776572	-0.493852	0.385729	-2.38539	0.12841	-2.62387	0.103071	-2.01723	0.554306
(p.Ser.55.Ala)	S	55	A	var	2	0.543657	0.155993	0.00341699	0.0936036	-0.0478353	0.102327	0.797145	0.303726	0.104717	0.00291548	-0.0349579	0.0416994	0.751388	0.0487379	0.042066	0.00554992	0.630292	0.349077
(p.Ser.55.Cys)	S	55	C	var	2	0.591829	0.120529	0.000836329	0.0557235	0.0296902	0.116067	0.861308	0.233972	0.074865	0.119471	0.0841498	0.0885572	1.0841	0.0406173	0.116641	0.0324861	1.31449	0.926252
(p.Ser.55.Asp)	S	55	D	var	2	-0.16325	0.0671958	0.201258	0.0532452	0.137917	0.151889	-0.984154	0.106673	-0.00408762	0.0638954	-0.101125	0.0372773	-0.455386	0.162176	0.133024	0.151013	-0.310692	0.457538
(p.Ser.55.Glu)	S	55	E	var	2	0.946738	0.0835177	-0.000416273	0.0689893	0.0225991	0.0352821	0.552008	0.447792	0.114962	0.010232	0.0450239	0.00825277	1.17604	0.0551025	0.0592318	0.0326668	1.18568	0.324449
(p.Ser.55.Phe)	S	55	F	var	2	0.745025	0.243203	-0.217984	0.320951	-0.0889081	0.122133	-1.58867	2.24077	0.119463	0.261155	0.169444	0.0611373	0.477102	0.813217	0.258881	0.448925	-0.0678398	0.79675
(p.Ser.55.Gly)	S	55	G	var	2	0.953648	0.13851	-0.0242956	0.0211932	0.0104362	0.0801863	1.43837	0.561796	0.0292608	0.0292927	-0.0179574	0.0553426	1.68691	0.301085	0.0387715	0.000617789	2.35675	1.49481
(p.Ser.55.His)	S	55	H	var	2	0.458003	0.0261827	-0.177284	0.211102	-0.230244	0.14346	-2.98384	0.677783	-0.0609342	0.00730571	-0.0401163	0.18517	-1.38879	1.09591	0.0102355	0.0556824	-1.15669	0.596896
(p.Ser.55.Ile)	S	55	I	var	2	0.204687	0.174572	-0.770317	0.0795703	-0.229331	0.00619337	0.863856	0.67927	-0.481271	0.14148	-0.204444	0.0756416	1.02433	0.610411	-0.693312	0.151798	1.888	1.8027
(p.Ser.55.Lys)	S	55	K	var	2	-1.67929	0.211517	0.0485678	0.0259679	0.00330667	0.0206818	-1.9726	0.427001	-0.359567	0.892479	0.0211738	0.00522765	-1.69528	0.482595	0.0143909	0.151407	-2.1792	0.0126983
(p.Ser.55.Leu)	S	55	L	var	2	0.963198	0.128249	-0.0100462	0.00987802	0.018862	0.110679	1.4418	0.581225	0.0577621	0.0434962	-0.0188568	0.022918	1.65751	0.382284	0.0936146	0.00937433	2.43047	1.57377
(p.Ser.55.Met)	S	55	M	var	2	0.966431	0.324268	0.219893	0.261192	-0.303762	0.430653	1.81487	0.634015	0.413071	0.383406	0.379063	0.397493	1.99852	0.399521	0.344258	0.222572	3.04955	1.78867
(p.Ser.55.Asn)	S	55	N	var	2	1.02589	0.0629574	0.052721	0.178542	0.253373	0.0538794	1.25486	0.308964	0.0854292	0.0778538	0.051754	0.173622	1.42558	0.179362	0.192499	0.0352299	1.31693	0.644522
(p.Ser.55.Pro)	S	55	P	var	2	-0.47082	0.150705	-0.114856	0.116484	-0.0629246	0.0442324	-1.03722	0.196922	-0.771161	0.324845	-0.0436658	0.00902271	-0.411383	0.185582	-0.350495	0.320268	-0.49725	0.222141
(p.Ser.55.Gln)	S	55	Q	var	2	0.528839	0.183721	-0.681579	0.0418934	-0.160887	0.083502	0.953508	0.507402	-0.443532	0.037729	-0.115918	0.272994	1.00921	0.135988	-0.328655	0.109751	1.54985	1.08601
(p.Ser.55.Arg)	S	55	R	var	2	0.998371	0.171175	0.0398476	0.0758563	0.0138593	0.0724288	0.836131	0.113686	0.0828094	0.0230179	0.0413122	0.0847088	0.974931	0.0562852	0.0825101	0.0257661	0.200901	0.070654
(p.55.=)	S	55	S	syn	2	0.146915	0.0652294	-0.0130729	0.0145198	-0.0315675	0.0890912	0.348948	0.137815	0.0695007	0.141236	-0.0242346	0.00856669	0.353129	0.110761	-0.00886035	0.015437	0.588077	0.527436
(p.Ser.55.Thr)	S	55	T	var	2	0.677407	0.120776	0.104592	0.13465	0.0520554	0.106327	1.15879	0.324706	0.132407	0.17177	0.0339494	0.0216397	1.16754	0.03565	0.134268	0.0943513	1.42843	0.651072
(p.Ser.55.Val)	S	55	V	var	2	1.01805	0.129385	0.000143536	0.00348221	-0.00377591	0.0806451	1.53252	0.63789	0.153757	0.00379753	0.0622729	0.102083	1.84318	0.352094	0.110805	0.0138211	2.44266	1.60044
(p.Ser.55.Trp)	S	55	W	var	2	0.990632	0.115741	-0.0116045	0.0852716	0.0136039	0.0546697	1.2002	0.217726	0.0151506	0.0386196	-0.00824496	0.0476518	1.28049	0.0355135	0.0282033	0.0819778	1.73659	0.837982
(p.Ser.55.Tyr)	S	55	Y	var	2	0.842129	0.381141	-0.0925474	0.0616979	-0.183837	0.182746	0.220876	0.755939	-0.00534067	0.0202145	0.0761341	0.162936	0.852633	0.214128	-0.00431252	0.303561	0.710754	0.272305
(p.His.56.Ter)	H	56	*	var	2	-8.68717	0.0318522	-3.11074	0.132928	-0.391791	0.00347322	-8.74577	0.162437	-4.03882	0.0789422	-0.739335	0.705691	-4.25038	0.266223	-2.95327	0.0484234	-4.8909	0.441724
(p.His.56.Ala)	H	56	A	var	2	-6.63685	0.292394	-1.4659	0.385617	0.0163071	0.0786432	-6.9408	0.496413	-3.61769	0.14416	0.155541	0.172938	-3.64338	0.0346548	-2.94699	0.215417	-4.3915	0.619142
(p.His.56.Cys)	H	56	C	var	2	-8.65544	0.0200474	-0.811827	0.188311	-0.19312	0.233364	-7.68821	1.30801	-3.78983	0.427488	0.260261	0.100203	-3.61682	0.230058	-3.47365	0.0775597	-4.77355	0.151787
(p.His.56.Asp)	H	56	D	var	2	-5.21261	0.597842	0.209703	0.0691027	0.240115	0.0428598	-5.97787	2.44971	-1.80903	1.579	-0.0164937	0.265582	-3.54378	0.0565478	-1.43251	1.05427	-3.80934	0.460772
(p.His.56.Glu)	H	56	E	var	2	-9.48666	0.185602	-3.74511	0.467207	-0.0215918	0.0716962	-8.82619	1.15053	-4.31275	0.251366	-0.0523864	0.0509969	-3.96231	0.107796	-3.67284	0.179174	-4.84427	0.178818
(p.His.56.Phe)	H	56	F	var	2	-6.05979	0.551791	0.148548	0.116984	0.0365726	0.375066	-5.87322	0.922679	-1.01384	1.16931	-0.156595	0.114797	-3.5813	0.162764	-0.179947	0.191694	-4.84924	0.267222
(p.His.56.Gly)	H	56	G	var	2	-7.88223	0.0230414	-0.905615	0.257292	0.0270224	0.10029	-7.36291	0.287927	-3.64687	0.0709521	0.0530508	0.00738973	-3.86503	0.00131978	-3.28257	0.0622807	-4.57568	0.290885
(p.56.=)	H	56	H	syn	2	-0.773625		-0.632075		-0.428573		-0.532784		-0.0966616		-0.140436		-0.347818		-0.499129		-0.350954
(p.His.56.Ile)	H	56	I	var	2	-7.55171	0.237351	-3.3128	0.0880337	0.267942	0.0433717	-7.5659	0.0776422	-5.6102	2.05343	0.224675	0.0989038	-3.98151	0.547603	-2.79582	0.0422376	-5.95696	0.577814
(p.His.56.Lys)	H	56	K	var	2	-8.3316	0.0336929	-4.25517	0.669837	-0.168064	0.10209	-8.4151	0.156339	-6.4594	1.97473	-0.917713	0.896843	-3.91426	0.0466857	-4.14502	0.586173	-4.41548	0.230914
(p.His.56.Leu)	H	56	L	var	2	-6.11309	0.442302	-3.00287	0.177333	-0.114351	0.111174	-5.52683	0.375347	-4.02869	0.445121	-0.174087	0.062728	-3.80819	0.0952365	-3.27895	0.0132362	-4.07807	0.235616
(p.His.56.Met)	H	56	M	var	2	-8.29731	0.0784188	-3.98361	0.491175	-0.26877	0.154969	-7.73119	0.783745	-4.56797	0.226586	-0.50823	0.542324	-4.32076	0.406526	-3.5711	0.00231376	-4.91473	0.165187
(p.His.56.Asn)	H	56	N	var	2	-5.10291	0.0860101	-0.356087	0.131869	0.148385	0.269825	-5.15106	0.368277	-3.32089	0.25787	-0.27774	0.235273	-3.80339	0.0555712	-2.51541	0.350076	-3.35363	0.247614
(p.His.56.Pro)	H	56	P	var	2	-6.29927	1.42624	-4.01913	1.21861	-0.283286	0.0839116	-6.9982	1.56152	-4.10526	0.320126	-0.747184	0.566649	-3.98981	0.235778	-3.79687	0.159789	-4.15954	0.477899
(p.His.56.Gln)	H	56	Q	var	2	-2.66166	0.206583	0.116963	0.0336781	0.0817284	0.0544755	-3.69895	0.193261	0.0860636	0.101035	0.0133193	0.0860195	-2.9143	0.20416	0.0926425	0.174582	-3.17497	0.580135
(p.His.56.Arg)	H	56	R	var	2	-5.23065	0.0312284	-3.05158	0.0240085	0.00464815	0.0948012	-5.32491	0.394849	-3.81446	0.00288678	0.00217235	0.150985	-3.6281	0.148171	-3.08152	0.0992832	-4.05158	0.355562
(p.His.56.Ser)	H	56	S	var	2	-5.30116	0.19753	-0.083288	0.137773	-0.0725347	0.183288	-4.73211	1.44336	0.137531	0.431698	0.126981	0.286365	-3.59631	0.409583	0.192852	0.299607	-3.85382	1.00551
(p.His.56.Thr)	H	56	T	var	2	-3.71891	0.379442	0.112842	0.307085	-0.00786656	0.0204689	-4.20224	0.782449	-0.190775	0.178747	-0.383645	0.208363	-4.35301	0.159251	-0.192357	0.0620612	-5.37823	3.1279
(p.His.56.Val)	H	56	V	var	2	-7.09041	0.0645965	-0.0316177	0.0108526	0.0105688	0.0134036	-6.71141	0.716153	-2.76672	0.450623	0.0294388	0.105282	-3.74936	0.0151337	-2.39223	0.692821	-4.36964	0.0535083
(p.His.56.Trp)	H	56	W	var	2	-9.48612	0.0397422	-3.76408	0.585165	0.102046	0.123341	-8.7677	1.35302	-4.58228	0.133773	-0.0321693	0.391581	-3.78147	0.0260982	-3.39585	0.16748	-4.47414	0.270627
(p.His.56.Tyr)	H	56	Y	var	2	-2.09852	0.0243284	-1.15282	0.265905	-0.265117	0.0367313	-2.51262	0.716337	-1.77046	0.548358	-0.0556826	0.52968	-1.99656	0.949962	-1.47462	0.133963	-1.98011	0.0338828
(p.Ile.57.Ter)	I	57	*	var	2	-4.21064	0.0115025	-2.78713	0.137111	-0.0443721	0.0444421	-6.4125	1.13103	-2.81282	0.436729	-0.166354	0.137417	-3.65415	0.213202	-2.31909	0.0978698	-4.14382	0.258002
(p.Ile.57.Ala)	I	57	A	var	2	-1.71572	0.499522	-0.00807437	0.121743	-0.082117	0.0489474	-4.41914	1.22298	-0.0115305	0.0983601	-0.0411666	0.0997924	-2.76524	0.400338	0.0441591	0.0515817	-2.1697	1.57906
(p.Ile.57.Cys)	I	57	C	var	2	-2.55666	0.104506	0.00180862	0.174504	-0.0330914	0.286813	-5.26071	1.78425	0.0788002	0.0443415	-0.0346676	0.036987	-3.0323	0.388212	0.0278022	0.0114876	-3.46075	1.77093
(p.Ile.57.Asp)	I	57	D	var	2	-5.79731	0.704391	-2.71964	0.0270848	0.0697997	0.0912117	-7.24104	0.373313	-2.73913	0.515738	0.14551	0.0575734	-3.73515	0.226588	-2.17122	0.17484	-4.22842	0.288742
(p.Ile.57.Glu)	I	57	E	var	2	-0.115025	0.0777021	-0.0750261	0.0467336	-0.0238282	0.098854	-4.43637	1.33439	0.0446362	0.113227	-0.0866144	0.04211	-2.63926	0.622563	0.0443852	0.127107	-2.28753	1.52125
(p.Ile.57.Phe)	I	57	F	var	2	0.830642	0.0541356	-0.162614	0.181361	-0.112208	0.0191112	-2.27978	1.0831	0.1548	0.0167219	0.133737	0.207923	-0.163425	0.949743	0.181004	0.0210811	-1.02882	0.972188
(p.Ile.57.Gly)	I	57	G	var	2	-4.26222	0.282907	-2.44424	0.639197	0.00102064	0.0727636	-5.85264	0.40002	-3.10652	0.298005	0.0562698	0.064879	-3.35644	0.147645	-2.34181	0.312001	-3.24156	0.526078
(p.Ile.57.His)	I	57	H	var	2	0.819308	0.199529	-0.148451	0.243939	0.0602661	0.0899099	-1.94692	1.76734	0.22653	0.0465822	-0.0296393	0.23006	0.16899	0.596953	0.293303	0.0411659	0.100139	0.767939
(p.57.=)	I	57	I	syn	2	0.352258	0.0975512	0.0393767	0.147859	0.037214	0.0853577	3.14541e-05	0.158802	-0.122368	0.373812	0.0325067	0.0987015	0.0707948	0.00261367	0.177959	0.044047	0.0939845	0.277492
(p.Ile.57.Lys)	I	57	K	var	2	-1.84606	0.598975	0.0526425	0.00350854	0.0745896	0.0192736	-4.92558	1.57848	-0.116988	0.0374118	-0.0948417	0.0222536	-3.33515	0.187485	-0.0843509	0.148286	-2.87792	1.70677
(p.Ile.57.Leu)	I	57	L	var	2	0.645749	0.0311256	-0.0333	0.0387311	-0.0962005	0.0360973	-1.34967	1.38291	0.0743308	0.0990725	0.016068	0.0560408	-0.0405867	0.6285	0.0731996	0.107107	-1.14071	1.21051
(p.Ile.57.Met)	I	57	M	var	2	0.13085	0.235896	0.242754	0.145636	0.10494	0.378417	-2.70012	0.973014	0.289607	0.10026	0.226013	0.000373932	-1.16741	0.65294	0.0635627	0.0736476	-1.34184	1.5646
(p.Ile.57.Asn)	I	57	N	var	2	-2.70952	0.163386	-0.0538506	0.113145	-0.129901	0.134544	-4.11431	0.943376	-0.35528	0.535337	-0.0191594	0.036693	-2.96031	0.432676	-0.0528832	0.048365	-2.64215	1.13671
(p.Ile.57.Pro)	I	57	P	var	2	-5.44212	0.555648	-3.28722	0.475982	-0.334933	0.110616	-8.55168	0.291665	-3.29437	0.16199	-0.704478	0.566975	-4.20737	0.118286	-2.8736	0.0623921	-4.00961	0.885267
(p.Ile.57.Gln)	I	57	Q	var	2	-2.5554	0.242563	-0.147058	0.0970729	0.0201678	0.176469	-3.71762	0.918032	-0.055173	0.134582	-0.0171036	0.101853	-2.41395	0.0660966	-0.0939008	0.00894379	-2.19642	0.73883
(p.Ile.57.Arg)	I	57	R	var	2	-0.25591	0.274762	-0.0174783	0.0157667	-0.0397525	0.0338375	-4.06465	0.972372	0.0375967	0.0683985	-0.0260434	0.0267517	-1.70873	1.0369	0.0201136	0.0390244	-1.30164	1.42917
(p.Ile.57.Ser)	I	57	S	var	2	0.485234	0.0718696	0.0453709	0.0415341	0.0178879	0.0141147	-2.88659	1.29104	0.165464	0.0738403	0.0950674	0.0683979	-0.49349	0.695732	0.07179	0.157971	-0.121479	0.655672
(p.Ile.57.Thr)	I	57	T	var	2	0.745344	0.0921739	-0.0130139	0.0853052	-0.00108117	0.119826	1.25148	0.600126	-0.0472627	0.0203394	-0.0446008	0.226349	1.57039	0.325059	-0.0191555	0.0964212	2.13447	1.47227
(p.Ile.57.Val)	I	57	V	var	2	0.529718	0.0860012	-0.024603	0.0361762	0.0484009	0.133064	0.74141	0.266585	0.0294652	0.0299448	-0.015704	0.0708355	0.709773	0.184732	0.0203568	0.0334612	0.84232	0.562863
(p.Ile.57.Trp)	I	57	W	var	2	0.560197	0.0506471	-0.0168032	0.0986505	-0.0820435	0.095477	-2.97534	0.915854	0.0652055	0.035796	-0.0751079	0.0155515	-0.917369	1.00386	0.00812361	0.0385913	-2.13009	1.6037
(p.Ile.57.Tyr)	I	57	Y	var	2	0.600476	0.0319791	-0.150212	0.0454563	-0.0293512	0.0174513	-3.52468	1.34139	0.0612873	0.188477	-0.0201584	0.202109	-1.25606	1.04506	0.110584	0.250619	-2.38387	2.19377
(p.Ala.58.Ter)	A	58	*	var	2	-4.20109	0.237456	-3.78968	0.028876	-0.474376	0.172473	-4.27313	0.537111	-3.7595	0.207936	-1.00658	1.10463	-3.54587	0.248977	-2.72075	0.00864923	-3.32945	0.287186
(p.58.=)	A	58	A	syn	2	0.0755842	0.124046	0.0342167	0.221917	-0.104596	0.178133	0.188779	0.210766	0.05737	0.103764	0.0850789	0.0806256	0.164	0.219523	0.0361191	0.074415	0.094727	0.0814842
(p.Ala.58.Cys)	A	58	C	var	2	-2.75919	0.0437424	-0.017002	0.00727691	-0.0747025	0.0716588	-2.72724	0.780604	-0.00802665	0.0534405	-0.0758305	0.332852	-2.35812	0.125746	0.0296639	0.000222762	-2.18595	0.856733
(p.Ala.58.Asp)	A	58	D	var	2	-2.50852	0.0588189	0.0857964	0.08542	0.091477	0.0985618	-3.99094	2.13139	-0.102987	0.421824	-0.0134978	0.026829	-3.04523	0.532196	-0.0861617	0.346438	-3.10101	1.24429
(p.Ala.58.Glu)	A	58	E	var	2	-0.914503	0.119387	0.0386257	0.00971857	-0.0591652	0.0309041	-1.35567	0.615562	0.210431	0.196657	0.0569099	0.0229534	-1.35276	0.37136	0.0870451	0.211955	-1.40308	0.938424
(p.Ala.58.Phe)	A	58	F	var	2	-4.59191	0.372192	-3.04634	0.706055	-0.144891	0.0534782	-5.19571	0.924055	-3.26366	0.157834	-0.0503366	0.0115754	-3.66657	0.0681055	-2.88914	0.414314	-3.82267	0.535314
(p.Ala.58.Gly)	A	58	G	var	2	0.672047	0.0974315	-0.0377925	0.0209489	-0.0215725	0.040254	0.424242	0.275625	0.12113	0.0559998	0.0393783	0.0552112	0.895508	0.0267968	0.0814971	0.00345229	-0.0371735	0.293022
(p.Ala.58.His)	A	58	H	var	2	-2.79091	0.303287	-0.0335687	0.228435	0.0163533	0.104632	-2.62326	0.482355	0.0369175	0.166009	-0.0871685	0.230364	-2.96474	0.0523556	0.176452	0.188789	-2.46655	0.936783
(p.Ala.58.Ile)	A	58	I	var	2	-0.164983	0.0401871	-0.00890222	0.0593753	0.0335129	0.0413166	-0.134889	0.345879	0.187388	0.273683	0.170763	0.0866318	-1.62601	0.362724	0.147092	0.0445369	-1.65082	1.28377
(p.Ala.58.Lys)	A	58	K	var	2	-3.49675	0.0380692	-0.1483	0.0510414	-0.114163	0.110864	-3.98399	1.15582	-1.06566	1.13439	0.199247	0.0941972	-3.04112	0.144206	-1.58515	0.631526	-3.34783	0.649176
(p.Ala.58.Leu)	A	58	L	var	2	-3.72977	0.138773	0.0701574	0.0514134	-0.0258014	0.0645851	-3.95188	1.18886	0.141559	0.37528	0.0939545	0.0187207	-3.48637	0.179032	-1.08511	0.63119	-3.81671	0.991876
(p.Ala.58.Met)	A	58	M	var	2	-4.82605	0.351297	0.0749086	0.0137118	0.104411	0.0337815	-4.26883	0.815097	0.174252	0.0877966	-0.179258	0.00746266	-3.77633	0.663056	-0.68129	0.401489	-3.72611	0.552409
(p.Ala.58.Asn)	A	58	N	var	2	0.478755	0.00563924	-0.0835421	0.0430427	0.0538496	0.106902	-0.210795	0.638449	0.0805622	0.00715912	0.0933333	0.198843	-0.167321	0.0726768	0.0452634	0.118649	-0.485271	0.481166
(p.Ala.58.Pro)	A	58	P	var	2	-3.60574	0.292617	-3.20304	0.187875	0.0687113	0.129114	-5.3419	0.416029	-3.39223	0.79034	-0.59008	0.943231	-3.31096	1.06222	-2.91876	0.00658392	-3.14799	0.132559
(p.Ala.58.Gln)	A	58	Q	var	2	1.10724	0.0974173	0.425485	0.469777	0.622597	0.0117527	0.731986	0.643913	0.0683971	0.74539	-0.169863	0.39617	0.0291637	1.24299	0.290614	0.844765	1.3039	0.508694
(p.Ala.58.Arg)	A	58	R	var	2	-3.21347	0.268734	-2.50434	0.243577	0.132271	0.0873343	-4.88838	0.963337	-2.52867	0.000337363	0.0683666	0.0592648	-3.21064	0.0418587	-2.35857	0.0774074	-3.52219	0.711825
(p.Ala.58.Ser)	A	58	S	var	2	0.646826	0.22005	-0.000185003	0.0791631	0.0856283	0.0897417	1.13713	0.418508	0.0362172	0.00518401	0.0221467	0.117892	0.194312	0.0888283	0.00160462	0.00699276	1.53301	1.07588
(p.Ala.58.Thr)	A	58	T	var	2	-0.494569	0.164518	-0.104516	0.0882135	-0.0155427	0.105401	-0.539843	0.0506869	0.00791915	0.0292339	0.127542	0.116709	-0.534096	0.0326602	-0.0466879	0.0873632	0.103417	0.438391
(p.Ala.58.Val)	A	58	V	var	2	0.333654	0.0504403	0.0575379	0.0310368	-0.0189066	0.0136753	0.56875	0.0607997	0.0996133	0.0328022	0.00649446	0.103015	-0.370608	0.0567494	0.0993796	0.0642978	-0.71549	0.550762
(p.Ala.58.Trp)	A	58	W	var	2	-4.4964	0.382869	-3.54027	0.24482	0.0382021	0.0757711	-5.86225	0.746918	-3.32853	0.197771	-0.375583	0.419032	-3.70584	0.315405	-2.94183	0.0312767	-3.97126	0.448259
(p.Ala.58.Tyr)	A	58	Y	var	2	-2.7908	0.394138	-2.11981	0.265065	0.00848253	0.0693682	-4.44288	1.45864	-2.21608	0.315437	0.130423	0.00787864	-3.0216	0.283713	-2.00016	0.0813642	-3.35228	0.977424
(p.Thr.59.Ter)	T	59	*	var	2	-4.4957	0.403151	-3.60475	0.243216	-0.260078	0.0148403	-4.39311	0.339294	-3.62087	1.06917	-0.429917	0.922352	-3.3926	0.438801	-2.39532	0.0279295	-4.37294	1.82038
(p.Thr.59.Ala)	T	59	A	var	2	0.156928	0.000985384	-0.0653052	0.0351522	-0.0476116	0.0604157	0.097005	0.00723802	0.0460803	0.0826095	-0.0103047	0.0620202	0.0817038	0.0143477	0.0412789	0.0951309	0.0725857	0.120955
(p.Thr.59.Cys)	T	59	C	var	2	-4.32889	0.608737	0.0899705	0.0198129	-0.0217032	0.127302	-3.24652	0.673232	0.210273	0.0560128	0.01348	0.158452	-3.21639	0.544955	0.0967876	0.043091	-3.31737	1.38857
(p.Thr.59.Asp)	T	59	D	var	2	-5.30911	1.03658	-0.0525815	0.0690524	-0.0148394	0.29615	-5.60436	2.63431	-1.29268	1.71024	0.155881	0.204233	-3.23503	1.03528	-0.37322	0.509345	-3.5832	0.436958
(p.Thr.59.Glu)	T	59	E	var	2	-0.977235	0.236181	0.00139921	0.00578212	0.0520729	0.119199	-4.19575	1.72002	-0.00827365	0.12934	-0.148151	0.0706278	-2.8031	0.302426	-0.0994751	0.114351	-3.16319	1.72114
(p.Thr.59.Phe)	T	59	F	var	2	0.866622	0.0846277	-0.0288571	0.330904	0.153881	0.00509034	-0.858348	1.84425	-0.00590769	0.102645	-0.207818	0.340715	-0.00336846	0.731199	-0.169273	0.823205	-1.01925	1.15013
(p.Thr.59.Gly)	T	59	G	var	2	0.414388	0.0904972	-0.0870238	0.0208372	-0.0141027	0.014801	-1.27593	1.34529	0.0546727	0.064349	0.039571	0.0761624	-0.112583	0.554012	0.132747	0.00699935	0.0940599	0.508465
(p.Thr.59.His)	T	59	H	var	2	0.854764	0.167292	0.0113712	0.185622	-0.0526029	0.0895476	-0.866319	1.57635	0.085963	0.251055	-0.0838714	0.154604	0.143385	0.417499	0.164174	0.182097	-0.826873	1.04566
(p.Thr.59.Ile)	T	59	I	var	2	0.539323	0.172175	0.0407422	0.0538927	0.249532	0.198805	0.540817	0.297374	-0.0906813	0.322666	-0.151458	0.0870236	0.354726	0.0902284	-0.28476	0.177428	-0.882016	0.970719
(p.Thr.59.Lys)	T	59	K	var	2	-0.661832	0.0485395	0.104905	0.132586	-0.0800284	0.0421432	-1.31203	0.407522	0.0964999	0.202048	0.0812302	0.240918	-1.26047	0.000251301	-0.0767418	0.307187	-1.06849	0.796377
(p.Thr.59.Leu)	T	59	L	var	2	0.45369	0.201228	-0.00339631	0.0514256	-0.0620047	0.157114	0.430984	0.265552	0.145219	0.216701	0.140549	0.112076	0.635526	0.141024	0.189628	0.0779971	-0.703069	0.893274
(p.Thr.59.Met)	T	59	M	var	2	0.705084	0.167214	0.045173	0.0741815	0.138505	0.03309	0.505651	0.0395536	0.0229083	0.0498571	-0.0271451	0.250575	0.398965	0.0811257	0.0403498	0.164037	-0.279202	0.0210367
(p.Thr.59.Asn)	T	59	N	var	2	0.5318	0.0338411	-0.0311434	0.0378498	-0.0946528	0.123725	-0.676654	0.506728	0.0287261	0.133005	-0.162547	0.123937	0.0867185	0.155766	0.0515561	0.203781	-0.436138	0.705957
(p.Thr.59.Pro)	T	59	P	var	2	-4.20516	0.484937	-0.0415567	0.140811	-0.137381	0.0586972	-4.06434	1.06519	-0.61279	0.658771	0.0501853	0.153647	-3.49438	0.154855	-0.578046	0.194436	-3.36779	0.773933
(p.Thr.59.Gln)	T	59	Q	var	2	0.441388	0.0469256	-0.140647	0.0278429	-0.112277	0.0165487	0.0197246	0.495213	0.0387051	0.0165832	0.203136	0.0675666	0.467155	0.0929521	0.227381	0.0231306	-0.974902	1.10486
(p.Thr.59.Arg)	T	59	R	var	2	-1.41801	0.155123	-0.00962437	0.046461	0.00065389	0.000488609	-2.19011	0.545845	0.0849491	0.0786498	-0.00920399	0.20667	-1.82844	0.227881	0.0620429	0.00690285	-1.26638	0.792957
(p.Thr.59.Ser)	T	59	S	var	2	0.137048	0.0165726	0.123292	0.0954312	0.0973298	0.186631	0.225654	0.162003	-0.00913448	0.0653515	-0.0835019	0.36138	0.30052	0.154676	0.0622846	0.220665	0.433809	0.415795
(p.59.=)	T	59	T	syn	2	0.0641999	0.00891193	0.0221558	0.017421	0.0669437	0.084742	0.083483	0.190307	-0.0497312	0.072942	0.217534	0.194402	0.0356414	0.2862	0.054927	0.320717	0.036489	0.0220756
(p.Thr.59.Val)	T	59	V	var	2	0.813211	0.231784	0.00407678	0.0168407	0.074882	0.138172	1.15729	0.587788	0.0923927	0.109986	0.0606984	0.107715	1.12807	0.154165	0.0325788	0.169017	0.78982	0.680117
(p.Thr.59.Trp)	T	59	W	var	2	0.90264	0.102781	-0.21563	0.0102336	-8.15436e-05	0.0941975	-0.187559	1.07159	-0.104082	0.125086	-0.0962443	0.0426943	0.366114	0.268896	-0.00194194	0.115102	-1.4298	1.54829
(p.Thr.59.Tyr)	T	59	Y	var	2	0.252933	0.354304	-0.658725	0.0878889	-0.545698	0.267578	-1.09189	0.973014	-0.462576	0.554617	-0.330556	0.341436	-0.180847	0.0849983	-0.63764	0.227675	-1.85878	0.696604
(p.Gln.60.Ter)	Q	60	*	var	2	-3.52597	0.0791121	-2.73482	0.184743	-0.16474	0.190771	-3.82572	0.195823	-2.61259	0.128193	-0.572975	0.690548	-3.34266	0.119448	-2.30218	0.00126593	-3.37703	0.475607
(p.Gln.60.Ala)	Q	60	A	var	2	0.247174	0.110956	0.0215849	0.143745	0.0446818	0.132618	0.289828	0.0429836	0.0951393	0.149518	0.0522761	0.0606216	0.32454	0.0712827	0.0943204	0.0120282	0.243832	0.0388398
(p.Gln.60.Cys)	Q	60	C	var	2	-4.35648	0.093027	-0.0401725	0.12487	-0.000868832	0.0316672	-4.05453	0.920259	-0.125001	0.275528	0.0231446	0.118723	-3.21464	0.233752	-0.106247	0.187407	-3.54542	0.461884
(p.Gln.60.Asp)	Q	60	D	var	2	-3.31894	0.235464	0.00212668	0.0467637	-0.0488684	0.113454	-4.1018	1.37407	-0.108552	0.304598	-0.101251	0.013275	-3.43679	0.171841	-0.369015	0.372831	-3.13736	1.36212
(p.Gln.60.Glu)	Q	60	E	var	2	-4.28558	0.0133238	0.0192409	0.0423966	-0.0145462	0.0601376	-3.60835	0.570841	0.00411292	0.115895	-0.0843802	0.0913212	-3.54514	0.303731	-0.057358	0.0683022	-2.14375	1.19349
(p.Gln.60.Phe)	Q	60	F	var	2	-0.698557	0.0184195	-0.150732	0.0392668	-0.058746	0.0163792	-2.89874	1.34334	0.0350994	0.358282	0.0587798	0.0643137	-1.58061	0.664636	0.0534867	0.0932098	-2.49069	2.07881
(p.Gln.60.Gly)	Q	60	G	var	2	-4.23856	0.000954065	-0.0327134	0.003409	-0.0569534	0.0675129	-3.62732	0.807837	0.159263	0.077715	0.0576848	0.022406	-3.35075	0.14418	0.0776718	0.099119	-2.51668	1.27221
(p.Gln.60.His)	Q	60	H	var	2	-3.65163	0.295374	0.0143359	0.137135	-0.0939468	0.0552646	-2.91346	0.246404	0.0236396	0.0414803	-0.122732	0.320969	-1.55365	0.398758	-0.106027	0.18236	-0.540274	0.416389
(p.Gln.60.Ile)	Q	60	I	var	2	0.501671	0.102795	-0.00452343	0.0410395	0.0420457	0.174722	-1.85371	2.14475	0.143253	0.224041	-0.019151	0.0994229	-2.93036	0.234489	0.195263	0.0246367	-2.80111	0.958571
(p.Gln.60.Lys)	Q	60	K	var	2	-0.362704	0.0434099	-0.135741	0.0279031	-0.192166	0.0487137	0.194971	0.244085	0.201869	0.120817	0.00504478	0.00534761	0.253914	0.0462013	0.154472	0.132411	0.706507	0.582792
(p.Gln.60.Leu)	Q	60	L	var	2	-0.214934	0.11731	-0.00872236	0.153181	-0.0452184	0.109378	-2.62973	0.860467	0.00503744	0.175005	-0.0849892	0.103709	-1.62268	0.839952	0.0171752	0.117701	-2.71365	1.81296
(p.Gln.60.Met)	Q	60	M	var	2	0.184772	0.0230716	-0.285857	0.0581451	-0.024042	0.0390289	0.435841	0.124665	0.0721065	0.191145	-0.0608588	0.0998616	0.350046	0.141494	0.00572685	0.17525	-0.390898	0.667299
(p.Gln.60.Asn)	Q	60	N	var	2	-2.09233	0.694434	0.0273654	0.0613337	-0.00700097	0.147567	-2.47901	0.444325	0.0810795	0.103614	0.0530495	0.0382144	-1.73543	0.457942	0.0575418	0.0246658	-0.310481	0.245735
(p.Gln.60.Pro)	Q	60	P	var	2	-4.11176	0.309632	0.172341	0.311741	0.0617676	0.18917	-4.3148	0.697042	-1.14318	1.45945	-0.077689	0.142004	-3.08565	0.109787	-2.81567	0.278461	-3.74709	0.570228
(p.60.=)	Q	60	Q	syn	2	0.122927	0.0276672	-0.026084	0.0297389	0.0275545	0.0358228	0.0471872	0.0456321	-0.0980729	0.162008	-0.122449	0.0917691	-0.150327	0.0556917	-0.140444	0.144932	0.037911	0.223379
(p.Gln.60.Arg)	Q	60	R	var	2	0.88462	0.0896146	-0.0207289	0.0556734	-0.0584657	0.0229263	1.25705	0.503574	0.00417395	0.0565015	-0.0198396	0.0637473	1.03956	0.0765504	0.0136439	0.0419098	0.520904	0.313383
(p.Gln.60.Ser)	Q	60	S	var	2	-0.697074	0.0730178	-0.00928676	0.109222	-0.037324	0.26017	-0.986908	0.55017	0.203134	0.185944	0.0480857	0.0411852	-0.410554	0.225706	0.178743	0.0262385	0.110527	0.216832
(p.Gln.60.Thr)	Q	60	T	var	2	-0.305166	0.0343137	0.0576753	0.0727644	-0.0533018	0.139231	-0.845232	0.576147	-0.0129314	0.155978	-0.0383383	0.0789038	-1.81899	0.574027	0.0305801	0.155009	-0.898138	0.649594
(p.Gln.60.Val)	Q	60	V	var	2	0.670966	0.16245	0.0227045	0.0974398	0.0427226	0.101299	0.638273	0.0139709	0.0954846	0.0313736	0.0547544	0.0561776	-1.52961	0.296629	0.137132	0.0149002	-1.19149	0.882212
(p.Gln.60.Trp)	Q	60	W	var	2	-0.515734	0.137259	0.0702492	0.0229575	0.0499243	0.0772558	-2.4579	0.789638	0.132494	0.122985	0.0347806	0.0440383	-1.19777	0.996917	0.133744	0.121398	-2.2277	1.34116
(p.Gln.60.Tyr)	Q	60	Y	var	2	-0.555395	0.166861	-0.100111	0.0584935	-0.0416542	0.0705749	-1.66808	0.711707	0.187093	0.215202	-0.0693418	0.159646	-1.50012	0.224709	0.0399623	0.0577373	-1.43532	1.15518
(p.Ser.61.Ter)	S	61	*	var	2	-4.57149	0.72859	-1.82688	0.149251	-0.229709	0.11167	-4.72824	0.253532	-1.92064	0.201397	-0.708295	0.584369	-3.50767	0.0314547	-1.96918	0.102026	-3.92003	0.529627
(p.Ser.61.Ala)	S	61	A	var	2	-0.307477	0.0978873	-0.00957354	0.019837	-0.0317464	0.0527179	-0.301818	0.252305	0.219492	0.0931991	0.00914315	0.138315	-0.357741	0.164981	0.118177	0.0226714	-0.369411	0.349176
(p.Ser.61.Cys)	S	61	C	var	2	-2.99776	0.317693	0.0285722	0.00374466	0.155046	0.124001	-2.97601	0.614974	0.0965786	0.118128	-0.0382164	0.0222812	-2.76445	0.174924	0.0385741	0.0353836	-2.80865	1.0891
(p.Ser.61.Asp)	S	61	D	var	2	-1.06216	0.0717075	-0.0400758	0.0252176	0.130624	0.0646084	-0.535924	0.114415	0.10758	0.12906	-0.00282272	0.0564409	-0.429027	0.0361713	0.155526	0.0507745	0.767426	0.307414
(p.Ser.61.Glu)	S	61	E	var	2	-1.26145	0.0406592	0.0801733	0.0654213	0.0671719	0.162991	-1.27263	0.400926	0.144994	0.0140089	0.10223	0.170281	-1.07978	0.155959	0.135023	0.0117925	-0.490606	0.345872
(p.Ser.61.Phe)	S	61	F	var	2	-3.48929	0.258209	0.00964857	0.00777097	-0.180853	0.108082	-3.53361	1.18283	0.182638	0.236468	0.143294	0.0297744	-3.0439	0.528311	-0.140375	0.182007	-1.46767	1.3512
(p.Ser.61.Gly)	S	61	G	var	2	0.365561	0.107641	0.0120567	0.0146527	0.0256629	0.103281	0.490141	0.0308295	0.0600608	0.0685437	-0.0298428	0.0858023	0.226234	0.034031	0.0422689	0.0330825	0.119395	0.00386984
(p.Ser.61.His)	S	61	H	var	2	-2.09904	0.0640861	0.0286673	0.645684	-0.0911026	0.042614	-2.41058	1.19966	0.337197	0.237912	0.0484571	0.0402034	-2.51502	0.226719	0.395611	0.232231	-1.39029	1.22548
(p.Ser.61.Ile)	S	61	I	var	2	-2.61793	0.307793	0.0358528	0.0757758	-0.325301	0.166967	-3.28586	0.547314	0.260123	0.0782974	0.345325	0.169107	-2.11838	0.250142	-0.0378903	0.00920414	-1.00842	0.416216
(p.Ser.61.Lys)	S	61	K	var	2	-1.81607	0.353965	0.107082	0.0691008	0.00322011	0.126323	-1.73518	0.555856	0.196661	0.144418	0.148205	0.00416704	-1.37587	0.424739	0.231619	0.207106	-0.683127	0.888037
(p.Ser.61.Leu)	S	61	L	var	2	-3.42227	0.254203	0.0603898	0.0295353	0.0503808	0.0307979	-2.91956	0.269678	0.110653	0.0197868	-0.00633109	0.0413635	-2.92907	0.0392907	0.0670938	0.0991089	-1.73187	0.652033
(p.Ser.61.Met)	S	61	M	var	2	-1.58623	0.258032	-0.246855	0.132917	-0.147176	0.0167026	-2.12504	0.387518	0.116378	0.558179	0.131265	0.343994	-1.64007	0.878033	0.255666	0.439749	-0.880118	1.30939
(p.Ser.61.Asn)	S	61	N	var	2	-2.00137	0.0255945	0.125793	0.200169	0.228046	0.28946	-2.25476	0.803536	0.0760515	0.19499	0.29535	0.465723	-1.46431	0.858401	0.16445	0.426135	0.0927548	0.502735
(p.Ser.61.Pro)	S	61	P	var	2	-1.55716	0.347385	-0.100324	0.174502	0.00521401	0.0317669	-1.628	0.241493	-0.264276	0.193266	-0.0315049	0.00421752	-1.65859	0.119728	-0.137726	0.0984455	-1.35678	0.48213
(p.Ser.61.Gln)	S	61	Q	var	2	-1.58015	0.00770309	-0.00548857	0.115398	-0.0504353	0.194155	-1.43802	0.576732	0.192027	0.0437277	0.0934152	0.107749	-1.30909	0.192701	0.14001	0.116902	-1.49075	1.64021
(p.Ser.61.Arg)	S	61	R	var	2	-0.437063	0.0796052	0.0235955	0.0362523	-0.0472798	0.0287436	-0.606348	0.145247	0.109054	0.0656876	0.0528246	0.117087	-0.411476	0.0711324	0.0531259	0.0659628	0.0117372	0.0653475
(p.61.=)	S	61	S	syn	2	0.139235	0.0508316	-0.0887144	0.127304	0.0424191	0.0741719	0.301349	0.218764	0.00800047	0.00898802	0.0114699	0.225794	0.276307	0.142875	0.116568	0.0187716	0.267899	0.264124
(p.Ser.61.Thr)	S	61	T	var	2	-1.48259	0.0130166	0.0509892	0.172467	-0.0187223	0.166596	-1.86581	0.443414	0.00662557	0.0062774	-0.135821	0.0957601	-1.68024	0.47104	0.0513375	0.0724601	-1.49942	1.06222
(p.Ser.61.Val)	S	61	V	var	2	-3.62254	0.281787	0.0333666	0.0107287	-0.0504428	0.0756817	-3.23014	0.803709	0.17676	0.0654304	0.0913798	0.0825421	-3.04618	0.249859	0.00962925	0.0761206	-2.99383	1.05415
(p.Ser.61.Trp)	S	61	W	var	2	-3.02876	0.308123	0.137436	0.015441	-0.0307373	0.15079	-2.70413	0.490706	0.00644742	0.0407626	-0.248644	0.296673	-2.65995	0.285609	-0.0782726	0.000694624	-0.522076	0.355675
(p.Ser.61.Tyr)	S	61	Y	var	2	-5.44468	0.291311	0.0744869	0.0839064	0.0598714	0.12107	-3.71536	0.858712	0.214067	0.0411037	0.150485	0.352553	-3.4922	1.33056	0.0487386	0.599876	-1.7534	1.41945
(p.Phe.62.Ter)	F	62	*	var	2	-3.84371	0.554892	-2.63703	0.0290713	-0.366392	0.0270167	-4.6173	1.0302	-2.9651	0.711402	-0.667148	0.805778	-3.89632	0.506053	-2.37471	0.00865841	-3.22943	0.836373
(p.Phe.62.Ala)	F	62	A	var	2	0.0686792	0.132751	0.0412239	0.207093	-0.0261939	0.237322	-0.0570797	0.119766	0.0640695	0.0268436	-0.119766	0.1273	-3.06484	0.363582	0.0652716	0.0543753	-0.814015	0.531731
(p.Phe.62.Cys)	F	62	C	var	2	-2.84595	0.107503	-0.0357926	0.0555586	0.0702233	0.0630981	-2.74603	0.682301	0.12814	0.267828	0.0111343	0.420424	-3.41553	0.520756	-0.53992	0.00634119	-2.95786	1.10757
(p.Phe.62.Asp)	F	62	D	var	2	0.594514	0.252706	-0.054983	0.244446	-0.0840766	0.150671	0.456423	0.108668	0.0406136	0.264705	-0.0195046	0.0739204	-3.62112	0.146316	0.0122924	0.0367747	-0.513852	0.348502
(p.Phe.62.Glu)	F	62	E	var	2	0.24806	0.0248421	0.0912615	0.0159748	0.00687906	0.00754534	0.0516704	0.626606	0.178113	0.216406	0.151642	0.266347	-3.94177	0.34988	-0.0542398	0.303959	-0.409719	0.69895
(p.62.=)	F	62	F	syn	2	-0.213952		-0.231937		-0.184668		-0.623053	0.446649	-0.593173	0.634007	-0.132122	0.369686	-0.79091	0.365132	-0.604038	0.352377	-0.741709	0.110392
(p.Phe.62.Gly)	F	62	G	var	2	0.974361	0.258051	0.0588162	0.0770084	0.0951568	0.160897	1.26251	0.382987	0.0535421	0.104759	-0.0152236	0.0464457	-3.30997	0.0524536	0.0900458	0.0843549	-0.710373	0.468934
(p.Phe.62.His)	F	62	H	var	2	-1.46052	0.79737	-0.0758724	0.0427706	0.304502	0.0544426	-1.16329	0.411813	0.0629312	0.287776	0.0801449	0.217011	-3.15634	0.0514693	0.194349	0.0831783	-0.555226	0.225451
(p.Phe.62.Ile)	F	62	I	var	2	0.362905	0.105591	0.0185695	0.0317306	-0.0962442	0.115607	0.609642	0.161529	0.136645	0.189628	-0.000469985	0.0492914	-1.49841	0.0463769	0.0936462	0.0194655	1.12662	0.740251
(p.Phe.62.Lys)	F	62	K	var	2	-1.9777	0.489176	-0.105474	0.171922	-0.0332584	0.0557777	-2.23884	0.0612952	0.0192226	0.20978	0.0802936	0.0170926	-3.45731	0.40231	0.149507	0.0870357	-1.90245	0.898971
(p.Phe.62.Leu)	F	62	L	var	2	0.22418	0.165329	-0.118042	0.0796183	-0.00724868	0.042517	0.274866	0.128734	0.0256595	0.113159	0.0231499	0.0807739	-1.44004	0.169438	0.0473121	0.00774466	0.946716	0.588465
(p.Phe.62.Met)	F	62	M	var	2	0.374877	0.12855	-0.0735966	0.167341	-0.0314494	0.0442813	0.322572	0.228266	-0.0501757	0.183176	0.142185	0.185305	-1.54965	0.138718	-0.316301	0.0551472	0.407949	0.649517
(p.Phe.62.Asn)	F	62	N	var	2	0.600964	0.0984395	0.0390771	0.108958	0.183109	0.23497	-0.075628	0.316895	-0.0436107	0.135855	-0.136685	0.482772	-3.46555	0.128815	0.240416	0.240684	-1.17638	1.26025
(p.Phe.62.Pro)	F	62	P	var	2	-3.43307	0.385712	-0.296111	0.213319	-0.302278	0.125639	-3.46165	0.0593505	-0.0787152	0.0814415	-0.12266	0.563289	-4.28094	0.868837	-0.0109012	0.208483	-2.28639	1.85931
(p.Phe.62.Gln)	F	62	Q	var	2	0.124223	0.0268967	0.0600283	0.122718	-0.064412	0.132986	-0.381503	0.0542361	-0.248926	0.140039	-0.019288	0.241982	-3.09779	0.0643421	-0.0336616	0.25854	-0.941656	0.835532
(p.Phe.62.Arg)	F	62	R	var	2	-2.29595	0.00445832	-0.0932646	0.048626	-0.0821047	0.0205459	-2.06515	0.187514	0.0748672	0.110745	0.0067146	0.114205	-3.07922	0.160977	0.177071	0.0188564	-1.52245	1.02004
(p.Phe.62.Ser)	F	62	S	var	2	-0.156378	0.0636027	0.0647746	0.0498073	-0.00489138	0.0702154	-0.422603	0.345021	-0.00609456	0.0350408	-0.0635124	0.0267585	-2.95869	0.428061	-0.117413	0.081099	-0.75998	0.574445
(p.Phe.62.Thr)	F	62	T	var	2	-0.492899	0.0692673	0.0975592	0.104655	0.132489	0.0272856	-1.02177	0.37454	-0.0723068	0.0811527	-0.272837	0.0496194	-3.17672	0.264108	0.0833657	0.0856596	-0.303516	0.0523735
(p.Phe.62.Val)	F	62	V	var	2	-0.252884	0.165514	-0.0877897	0.0104762	-0.0345283	0.0153922	-0.113617	0.0811113	0.0585821	0.101959	-0.0313545	0.121056	-2.46568	0.16208	0.0683105	0.0149249	0.537513	0.610903
(p.Phe.62.Trp)	F	62	W	var	2	-1.58513	0.229512	-0.0767375	0.00258692	-0.101029	0.00734138	-1.51261	0.3735	0.0180376	0.273403	0.00775268	0.00979077	-2.70374	0.0925706	-0.0357097	0.283128	-1.36972	1.15142
(p.Phe.62.Tyr)	F	62	Y	var	2	-1.57691	0.443112	-0.112859	0.0997702	0.267203	0.291986	-1.81289	0.0065652	-0.0922137	0.0927683	-0.398862	0.21637	-2.32071	0.151659	0.0172384	0.117455	-0.217301	0.362681
(p.Asp.63.Ter)	D	63	*	var	2	-3.6865	0.174931	-1.85474	0.0340021	-0.216708	0.0573342	-4.09323	0.489644	-2.05121	0.38263	-0.730604	0.648022	-2.58771	0.166587	-1.97178	0.261295	-3.33604	1.0939
(p.Asp.63.Ala)	D	63	A	var	2	0.219232	0.104568	0.00605993	0.088561	0.00127467	0.204922	0.336731	0.0233421	0.0361738	0.0979519	0.0116258	0.0267481	0.84345	0.120413	0.00392619	0.121768	0.062712	0.0579319
(p.Asp.63.Cys)	D	63	C	var	2	-3.5768	0.117282	-1.67092	0.0931293	0.147123	0.301011	-4.45849	0.952912	-1.88306	0.401849	0.209844	0.161656	-2.516	0.0598192	-1.36658	0.399587	-3.39932	0.93418
(p.63.=)	D	63	D	syn	2	0.0241562	0.259027	-0.152432	0.288074	0.265714	0.15673	0.00103085	0.0152103	-0.0532249	0.0677357	0.0511108	0.429591	0.321349	0.00230296	-0.20641	0.129625	-0.040873	0.0400673
(p.Asp.63.Glu)	D	63	E	var	2	-1.40443	0.0117339	0.0507309	0.0322314	0.0565816	0.0172	-1.64756	0.152725	-0.0500211	0.0103515	-0.156824	0.163316	-1.04764	0.21745	-0.136116	0.0674881	-0.893818	0.345836
(p.Asp.63.Phe)	D	63	F	var	2	0.404687	0.56197	0.140922	0.419564	0.116357	0.310829	-0.045401	0.0471022	0.114292	0.0740092	-0.157118	0.058876	1.0742	0.12243	0.171589	0.0157891	-0.278818	0.727
(p.Asp.63.Gly)	D	63	G	var	2	0.502975	0.155526	0.00894702	0.0908386	0.0209418	0.0711813	0.72854	0.272106	0.0323593	0.0542513	-0.0626845	0.0335268	1.13252	0.174941	0.0143089	0.0514916	0.298698	0.240865
(p.Asp.63.His)	D	63	H	var	2	-1.37738	0.177641	0.0116875	0.305914	0.226533	0.171743	-1.32835	0.26613	0.199776	0.247426	0.0922126	0.242848	0.801336	0.133841	0.156502	0.0676573	-0.265168	0.273365
(p.Asp.63.Ile)	D	63	I	var	2	-0.96237	0.327066	-0.0115447	0.266017	-0.0189755	0.0581305	-1.52338	0.26757	0.009474	0.175179	-0.0277758	0.167152	-0.244349	0.158446	0.217323	0.141922	-1.33111	0.622675
(p.Asp.63.Lys)	D	63	K	var	2	-1.42871	0.135803	-0.0150423	0.0366646	0.0725646	0.122417	-1.25342	0.57125	0.221214	0.14178	0.152341	0.261705	0.690219	0.106232	0.256973	0.0744786	-0.0194754	0.493951
(p.Asp.63.Leu)	D	63	L	var	2	-0.41526	0.0748583	-0.0561062	0.0249434	0.0187833	0.132242	-0.582996	0.588722	0.1492	0.200988	0.154366	0.0173992	0.60903	0.0387473	0.0746898	0.105669	-0.354148	0.283737
(p.Asp.63.Met)	D	63	M	var	2	-0.604748	0.332763	0.068743	0.0255758	-0.117957	0.0411742	-0.7677	0.358601	0.206794	0.0987158	0.225602	0.0200938	0.869194	0.100242	0.25412	0.199328	0.0432718	0.122483
(p.Asp.63.Asn)	D	63	N	var	2	-0.0562605	0.105719	0.0569128	0.12002	-0.124655	0.0856698	0.256819	0.479638	-0.0295421	0.482303	0.0881546	0.0455957	0.803984	0.082464	0.226336	0.257296	0.128585	0.413384
(p.Asp.63.Pro)	D	63	P	var	2	-2.51717	0.456703	0.119835	0.0610323	0.269812	0.0813287	-2.79553	0.411474	0.185754	0.00507711	0.118691	0.0631607	-2.56233	0.236324	0.216793	0.0810121	-1.69114	1.24581
(p.Asp.63.Gln)	D	63	Q	var	2	-0.941225	0.0116657	0.142883	0.189674	0.0315089	0.214946	-1.24705	0.491956	0.147543	0.248831	0.0365958	0.0545789	0.0752473	0.142676	0.14102	0.277169	-0.105702	0.146829
(p.Asp.63.Arg)	D	63	R	var	2	-1.66311	0.084038	0.06598	0.117845	-0.00713334	0.178522	-1.80009	0.311768	0.055367	0.0790572	0.00232834	0.0322679	0.151891	0.0105785	0.0546904	0.012594	-0.750787	0.576158
(p.Asp.63.Ser)	D	63	S	var	2	0.170516	0.0636232	-0.025645	0.0691113	-0.0293862	0.0144672	0.377939	0.0629876	-0.0483503	0.0545355	0.0722508	0.0596527	1.00298	0.101321	0.0191259	0.138002	0.157529	0.077238
(p.Asp.63.Thr)	D	63	T	var	2	-0.544635	0.214506	0.0536008	0.275504	0.025952	0.0830841	-1.35279	1.04323	0.274973	0.0058346	0.0479696	0.245639	0.0169193	0.325482	0.124894	0.181747	-1.02806	1.1104
(p.Asp.63.Val)	D	63	V	var	2	-0.72507	0.0845152	0.0112397	0.0193156	-0.0237887	0.0517761	-1.37314	0.60061	0.135473	0.0976886	0.066555	0.0151765	0.172622	0.15355	0.114288	0.0567903	-1.11947	0.653662
(p.Asp.63.Trp)	D	63	W	var	2	-0.711967	0.0626378	-0.0364346	0.0278864	-0.0769892	0.0302445	-1.10312	0.609008	0.136623	0.168382	0.0645541	0.0222451	0.63219	0.0548848	0.132108	0.0112794	-0.528985	0.331208
(p.Asp.63.Tyr)	D	63	Y	var	2	0.324745	0.251881	-0.0307414	0.376681	0.0567105	0.345142	0.513554	0.00734214	0.392318	0.0364243	0.124659	0.284926	1.32087	0.310197	0.221411	0.308272	0.830697	0.522575
(p.Gly.64.Ter)	G	64	*	var	2	-5.0051	0.319138	-3.54956	0.0416205	-0.0629647	0.0249696	-6.06533	1.21463	-3.47794	0.400541	-0.647878	0.333581	-3.77327	0.0782744	-2.74003	0.0995381	-4.0044	0.260801
(p.Gly.64.Ala)	G	64	A	var	2	-0.329006	0.0728959	-0.0138659	0.108313	-0.0784882	0.0786076	-0.681928	0.248309	0.0614601	0.070778	0.030239	0.0325627	-0.759524	0.100428	0.0881238	0.0466833	-0.481544	0.315334
(p.Gly.64.Cys)	G	64	C	var	2	-4.35879	0.0144958	-1.996	0.711409	-0.0879491	0.155414	-4.87426	0.171283	-2.91604	0.0375979	-0.117583	0.265381	-3.37573	0.304807	-2.90059	0.0709576	-3.78061	0.508472
(p.Gly.64.Asp)	G	64	D	var	2	0.0779606	0.0204131	-0.128962	0.130381	-0.0807143	0.123797	0.343926	0.307165	-0.0413303	0.0848228	-0.126475	0.294851	-0.162195	0.259681	-0.0420251	0.160954	0.663296	0.792332
(p.Gly.64.Glu)	G	64	E	var	2	-0.159211	0.0365769	-0.0720244	0.0217079	-0.107714	0.0375324	-0.119541	0.0120493	0.0548729	0.0276867	0.0437242	0.10658	-0.609769	0.135677	0.0609468	0.0258102	0.164195	0.165344
(p.Gly.64.Phe)	G	64	F	var	2	-1.51655	0.0677448	0.043043	0.35329	0.234408	0.493752	-3.7947	1.37455	-0.0538449	0.0393491	0.0174496	0.0462836	-2.74738	0.812534	-0.0721445	0.00892609	-2.55999	1.70361
(p.64.=)	G	64	G	syn	2	0.131336	0.0430065	-0.0466364	0.0834032	-0.0438101	0.0545325	0.177466	0.0578128	0.0779816	0.0116332	0.0302195	0.1072	0.143163	0.0810745	0.063036	0.0804233	0.12871	0.130294
(p.Gly.64.His)	G	64	H	var	2	-0.721433	0.533793	-0.0760745	0.0256923	-0.623568	0.0810764	-0.382777	0.0433479	-0.0821556	0.16727	-0.194084	0.204172	-0.368526	0.107272	-0.239532	0.00679141	-0.452571	0.178458
(p.Gly.64.Ile)	G	64	I	var	2	-1.52062	0.193391	0.078842	0.027938	-0.023119	0.0625407	-1.92483	0.163193	0.257554	0.10788	0.170781	0.551284	-2.34478	0.385857	0.419269	0.141155	-1.45105	0.128593
(p.Gly.64.Lys)	G	64	K	var	2	-0.292669	0.156374	0.00879198	0.504759	0.136593	0.318126	-0.433311	0.287926	0.132935	0.00983208	0.0504318	0.0209106	-0.658082	0.197639	0.140588	0.175166	-0.304641	0.274912
(p.Gly.64.Leu)	G	64	L	var	2	-0.938681	0.130702	-0.00103761	0.0221726	0.0192447	0.0407216	-2.47925	1.18215	0.0645852	0.219752	0.0467228	0.0916819	-1.72185	0.312986	0.125689	0.123563	-1.72022	1.32288
(p.Gly.64.Met)	G	64	M	var	2	-0.630848	0.130703	-0.0467661	0.0480078	-0.115397	0.105317	-1.39959	0.648335	0.163335	0.048345	0.0954646	0.0560608	-1.20554	0.226403	0.165025	0.0175847	-0.947426	0.611214
(p.Gly.64.Asn)	G	64	N	var	2	-0.188254	0.000143052	-0.308102	0.227318	-0.124599	0.104809	0.122933	0.420694	-0.032321	0.354066	0.152893	0.55871	-0.168209	0.10968	0.291815	0.255611	0.268322	0.544281
(p.Gly.64.Pro)	G	64	P	var	2	-2.99671	0.100689	-0.0442705	0.326029	-0.147577	0.100641	-3.60743	0.708658	0.0372522	0.284303	0.0507264	0.157397	-3.22089	0.626375	0.00533658	0.275051	-3.53883	1.34492
(p.Gly.64.Gln)	G	64	Q	var	2	-0.291268	0.0579461	-0.192614	0.336435	-0.0422851	0.101809	-0.45186	0.00960072	0.0914465	0.0397276	0.0823593	0.0141713	-0.697261	0.293873	0.00305999	0.0338074	-0.10291	0.0411152
(p.Gly.64.Arg)	G	64	R	var	2	-0.592702	0.0169356	0.0187972	0.0479403	0.0536425	0.110883	-1.14221	0.423695	0.000940424	0.00440019	0.012164	0.143317	-0.814324	0.0510712	0.023433	0.089513	-0.895664	0.57381
(p.Gly.64.Ser)	G	64	S	var	2	-0.0998747	0.0938337	0.0738022	0.152471	0.0415784	0.202174	-0.247603	0.0454497	-0.00104542	0.0284162	0.0623093	0.150554	-0.409287	0.0570083	-0.0693613	0.32656	-0.272947	0.125868
(p.Gly.64.Thr)	G	64	T	var	2	-0.900743	0.0542338	-0.200367	0.0926781	-0.103919	0.0497346	-0.892153	0.0353654	-0.11524	0.168717	-0.0594638	0.394554	-1.24885	0.300273	-0.147066	0.506453	-0.658672	0.0911861
(p.Gly.64.Val)	G	64	V	var	2	-1.56597	0.139162	-0.0263079	0.0578277	-0.00264362	0.0571834	-2.54052	0.854616	0.047906	0.0323805	0.055148	0.201606	-2.162	0.394106	0.106752	0.0253571	-2.06023	1.00576
(p.Gly.64.Trp)	G	64	W	var	2	-2.15478	0.258422	-0.0229782	0.0781565	-0.0571801	0.205624	-3.04659	0.507132	-0.0284136	0.0857122	-0.0926959	0.223095	-2.81116	0.236555	0.0593996	0.199164	-2.44128	0.886516
(p.Gly.64.Tyr)	G	64	Y	var	2	-1.95187	0.951783	0.132107	0.217704	0.318035	0.0928274	-2.63297	0.612704	-0.0863924	0.269535	-0.0292889	0.407442	-2.67598	0.000918277	-0.169596	0.302637	-3.41973	3.5086
(p.Ala.65.Ter)	A	65	*	var	2	-4.22034	0.302867	-3.28381	0.153467	-0.266811	0.0318489	-4.02272	0.225564	-3.24939	0.334072	-0.686289	0.809369	-3.27306	0.248251	-2.58105	0.200333	-4.01581	0.903232
(p.65.=)	A	65	A	syn	2	0.0138984	0.0824553	-0.0395902	0.0784588	-0.0775852	0.0570847	0.189813	0.0837933	0.00102659	0.0228159	-0.0760962	0.0629559	0.0927006	0.0845994	0.0552369	0.149903	0.162078	0.0948229
(p.Ala.65.Cys)	A	65	C	var	2	-3.36779	0.023221	-0.0670327	0.0462062	-0.0918076	0.0665908	-2.56707	0.247358	0.123259	0.0706647	0.115202	0.223151	-2.35911	0.116055	0.143955	0.0739401	-2.66013	1.16911
(p.Ala.65.Asp)	A	65	D	var	2	0.605031	0.0217144	-0.0143481	0.186269	-0.00249769	0.0080045	0.831856	0.192987	0.0246331	0.11282	-0.021501	0.0978976	0.343672	0.187015	0.0205288	0.0812794	1.3244	0.955076
(p.Ala.65.Glu)	A	65	E	var	2	0.613352	0.0704359	0.028446	0.103432	0.0286334	0.130975	0.953523	0.445611	0.106878	0.0691482	-0.00592612	0.183604	0.418644	0.157795	0.0438278	0.117933	1.88893	1.3374
(p.Ala.65.Phe)	A	65	F	var	2	0.70983	0.137732	0.0675325	0.0725725	0.0172128	0.161648	1.05562	0.282974	0.110898	0.0529	0.0891957	0.0601085	1.09483	0.012722	-0.00895663	0.0589294	1.93365	1.47231
(p.Ala.65.Gly)	A	65	G	var	2	0.169271	0.0171429	-0.0202229	0.0252076	-0.0306562	0.0782828	0.128109	0.109306	0.0756635	0.0811455	-0.0210979	0.0688618	0.176502	0.0436019	0.042704	0.0180104	0.757344	0.379048
(p.Ala.65.His)	A	65	H	var	2	0.334028	0.286606	0.023795	0.124766	-0.0833847	0.258889	0.783466	0.131856	-0.0491416	0.439711	0.117897	0.330053	0.60214	0.0352866	-0.0516423	0.123735	0.70115	0.316859
(p.Ala.65.Ile)	A	65	I	var	2	0.592654	0.0739697	0.0135507	0.0611568	0.0414287	0.133854	0.964997	0.27973	0.18897	0.142887	0.1407	0.0410322	0.739947	0.00638613	0.182292	0.0915282	0.0531316	0.0324414
(p.Ala.65.Lys)	A	65	K	var	2	0.162651	0.124293	-0.00730369	0.117229	0.000701623	0.199095	0.332011	0.18824	0.0655433	0.00715181	0.0394528	0.159905	0.204186	0.114686	0.0721031	0.169864	-0.201171	0.121438
(p.Ala.65.Leu)	A	65	L	var	2	0.51682	0.0614176	-0.000261957	0.109568	-0.0309224	0.0411549	0.988385	0.220945	0.0969321	0.171871	-0.00734602	0.120833	0.743242	0.00828037	0.0558741	0.0275599	0.197678	0.0798628
(p.Ala.65.Met)	A	65	M	var	2	0.496065	0.200702	0.00504305	0.126809	0.00965094	0.250742	0.791644	0.196467	0.136568	0.232186	0.0982515	0.0357683	0.635791	0.12321	0.254582	0.0174292	0.126764	0.0975985
(p.Ala.65.Asn)	A	65	N	var	2	0.348794	0.193542	-0.0658877	0.24893	-0.0777869	0.226934	0.701985	0.211435	0.108398	0.165112	0.201919	0.0808015	0.760099	0.168331	0.201746	0.0817555	0.491441	0.446117
(p.Ala.65.Pro)	A	65	P	var	2	-1.92664	0.257222	-0.0116627	0.0906406	-0.0590421	0.0169264	-3.02195	0.720116	0.0729831	0.062067	0.023421	0.0987374	-2.76366	0.0132223	0.147343	0.0141559	-2.03783	1.03344
(p.Ala.65.Gln)	A	65	Q	var	2	0.608134	0.181596	0.00601092	0.194841	0.0120995	0.146105	0.815793	0.287249	0.141999	0.0348258	0.000614832	0.0608733	0.676553	0.100301	0.146669	0.00547287	0.762584	0.533592
(p.Ala.65.Arg)	A	65	R	var	2	-0.0758618	0.098248	-0.0354104	0.091828	0.00946957	0.049521	0.0782249	0.010379	0.130177	0.234791	0.0767601	0.0173272	0.196877	0.0661363	0.122303	0.0993492	-0.514524	0.321941
(p.Ala.65.Ser)	A	65	S	var	2	0.158518	0.0828431	-0.0868933	0.112335	-0.0583906	0.087285	0.214016	0.149577	-0.0434745	0.0151255	-0.0234796	0.17815	0.113217	0.0381183	-0.00182702	0.0455628	0.512258	0.446347
(p.Ala.65.Thr)	A	65	T	var	2	0.0665455	0.183629	8.26601e-05	0.171475	-0.0188723	0.03895	0.325042	0.173924	0.0659459	0.0602507	0.0664493	0.0556788	0.149605	0.13314	-0.0117143	0.0485591	0.095545	0.043447
(p.Ala.65.Val)	A	65	V	var	2	0.315331	0.139402	-0.0708084	0.0642797	-0.0352693	0.0929932	0.724862	0.2058	0.0382261	0.122758	-0.00382854	0.0481021	0.502935	0.0926979	0.0912538	0.0652481	-0.0185543	0.0330415
(p.Ala.65.Trp)	A	65	W	var	2	-3.89901	0.160159	-0.0318987	0.0440854	-0.0221108	0.0892965	-2.86785	0.0627685	0.182865	0.213852	0.137891	0.229599	-2.73089	0.0237828	0.163798	0.222192	-0.738168	0.408337
(p.Ala.65.Tyr)	A	65	Y	var	2	0.320676	0.0148068	-0.069042	0.0627351	-0.115307	0.25265	0.600188	0.454891	0.121967	0.226464	0.0543836	0.270405	0.666528	0.228097	0.218292	0.00397658	1.15831	0.548906
(p.Val.66.Ter)	V	66	*	var	2	-3.5666	0.129223	-3.76344	0.00660228	-0.3905	0.203553	-4.60784	1.131	-3.56163	0.376172	-1.03435	0.922564	-3.53877	0.238218	-2.94555	0.0866437	-3.24885	0.0991247
(p.Val.66.Ala)	V	66	A	var	2	0.762306	0.219869	-0.0860828	0.0676904	-0.0493627	0.0228528	1.22796	0.421567	-0.0392114	0.252188	-0.0132952	0.0909365	1.14756	0.0166288	-0.00178787	0.00737904	1.46374	0.899676
(p.Val.66.Cys)	V	66	C	var	2	-2.76958	0.132079	0.0609808	0.000745435	-0.0343746	0.0470606	-2.66622	0.705895	0.104972	0.153871	0.109668	0.0263013	-2.41218	0.488724	0.137106	0.136088	-2.49279	0.968296
(p.Val.66.Asp)	V	66	D	var	2	0.825921	0.106303	0.0513307	0.0346381	0.106697	0.00318576	0.904098	0.0168446	-0.0239012	0.255226	-0.0578294	0.0775889	0.883197	0.194383	-0.00170534	0.0700451	0.829852	0.317641
(p.Val.66.Glu)	V	66	E	var	2	0.749026	0.120568	0.0681176	0.00233057	0.0226651	0.0972483	0.978064	0.185741	0.109444	0.0887679	0.0126863	0.124697	0.899956	0.0305098	0.102141	0.001828	1.04702	0.507931
(p.Val.66.Phe)	V	66	F	var	2	0.774452	0.0120818	0.055337	0.0835107	0.143928	0.140726	0.966774	0.145117	0.0457548	0.0397425	-0.041175	0.0489498	1.10714	0.0266756	0.0870606	0.108277	0.949924	0.429495
(p.Val.66.Gly)	V	66	G	var	2	0.847978	0.14569	-0.0240918	0.03378	0.00213691	0.0749449	0.0683973	0.810813	0.0375466	0.0919448	-0.0269877	0.0185607	-0.150599	0.677818	0.0501375	0.0738694	0.204636	0.397068
(p.Val.66.His)	V	66	H	var	2	0.894033	0.04659	-0.16121	0.0777241	0.105978	0.172885	1.49471	0.489268	0.297087	0.0701055	0.208388	0.222226	1.31124	0.313665	0.397216	0.00406291	1.24986	0.764544
(p.Val.66.Ile)	V	66	I	var	2	-0.572318	0.0550005	0.0445421	0.0829856	0.0779922	0.0707398	-1.13051	0.5707	0.0395863	0.0982491	-0.130216	0.0574918	-0.666812	0.00723156	0.00749065	0.122026	-0.663556	0.326747
(p.Val.66.Lys)	V	66	K	var	2	0.789526	0.0285057	-0.140488	0.0741315	0.0715464	0.135311	1.55159	0.383022	0.144872	0.389628	0.131934	0.051349	1.33192	0.0705877	0.304403	0.015317	1.22736	0.830594
(p.Val.66.Leu)	V	66	L	var	2	0.605753	0.111776	-0.0476272	0.0781541	-0.0878687	0.071241	0.79883	0.18555	-0.00342482	0.123264	0.0870225	0.0608298	1.10082	0.0886528	0.0999271	0.00271219	0.84466	0.516724
(p.Val.66.Met)	V	66	M	var	2	0.705321	0.120999	-0.195048	0.0425032	0.0837063	0.0801972	1.05761	0.249379	0.0450846	0.212533	0.0393147	0.0249257	0.956474	0.0692344	0.0863114	0.146129	0.942559	0.552838
(p.Val.66.Asn)	V	66	N	var	2	0.901871	0.0410665	0.0233224	0.0528569	0.0593161	0.064379	1.35011	0.42234	0.056247	0.16648	0.0696815	0.135688	1.18585	0.145702	0.0731502	0.218883	1.67173	1.27778
(p.Val.66.Pro)	V	66	P	var	2	0.889983	0.225223	0.0340131	0.146124	0.0710166	0.00753407	0.639502	0.113146	-0.0112333	0.152808	-0.0333627	0.530782	0.739769	0.246096	0.0295558	0.118804	1.86857	1.45056
(p.Val.66.Gln)	V	66	Q	var	2	0.925834	0.0783388	0.0866767	0.229204	-0.0966019	0.121814	1.41714	0.487278	0.0407898	0.163225	-0.0606441	0.0478097	1.56395	0.043507	0.0265779	0.0534856	1.75161	1.23438
(p.Val.66.Arg)	V	66	R	var	2	0.876268	0.0779769	0.0250948	0.0371345	0.0419371	0.111976	1.27926	0.4201	0.121804	0.0290942	0.0509304	0.0732115	1.44765	0.150055	0.0863264	0.0168127	1.85308	1.18455
(p.Val.66.Ser)	V	66	S	var	2	0.901331	0.0170718	-0.0234002	0.145561	-0.0685973	0.153836	1.3273	0.544322	-0.101732	0.0537461	-0.0810656	0.0816825	1.27354	0.154706	-0.0809044	0.0435476	1.37291	0.844227
(p.Val.66.Thr)	V	66	T	var	2	0.927049	0.293671	0.00395169	0.145988	0.112592	0.247674	1.18045	0.344585	0.0243122	0.160316	-0.0173342	0.0913365	0.939815	0.0475751	-0.0436432	0.106709	0.8454	0.452066
(p.66.=)	V	66	V	syn	2	0.459474	0.0141568	0.0478613	0.0729769	0.0298536	0.000223787	0.644909	0.162786	0.0651163	0.0983182	0.0152278	0.0211834	0.57857	0.00481891	0.0686232	0.0592139	0.587307	0.267339
(p.Val.66.Trp)	V	66	W	var	2	0.00488771	0.0276374	-0.0259508	0.0222611	-0.0205172	0.128296	-0.651115	0.521747	0.0946849	0.000207747	0.0362416	0.188052	0.0349084	0.110309	0.120488	0.0254049	0.334786	0.116451
(p.Val.66.Tyr)	V	66	Y	var	2	0.565872	0.0710663	0.0149883	0.081753	0.0708008	0.00893724	0.650643	0.0688372	-0.051834	0.085837	-0.210325	0.38123	0.672332	0.198868	-0.0567188	0.162344	0.778212	0.674163
(p.Tyr.67.Ter)	Y	67	*	var	2	-4.50756	0.0143694	-2.58725	0.157775	-0.431133	0.338903	-4.89983	0.63019	-2.91306	0.356641	-0.931605	1.03218	-3.75715	0.117697	-2.71127	0.153468	-3.88127	0.768987
(p.Tyr.67.Ala)	Y	67	A	var	2	0.693524	0.0790406	0.0154299	0.0668345	-0.00199101	0.0932838	0.632269	0.0187504	0.137084	0.053249	0.00879997	0.0867656	-1.0084	0.432477	0.176876	0.0831603	0.175363	0.263416
(p.Tyr.67.Cys)	Y	67	C	var	2	-4.15668	0.0677572	-0.0208317	0.078314	-0.0125758	0.151463	-3.64383	0.795582	-0.020401	0.219042	-0.0657112	0.0134465	-3.37992	0.45076	-0.430345	0.210746	-3.12399	0.883455
(p.Tyr.67.Asp)	Y	67	D	var	2	-3.51737	0.146722	0.0189749	0.0513762	-0.0409459	0.0894293	-3.53702	0.650849	0.191511	0.0598217	0.00360407	0.0860698	-3.6206	0.127577	-0.979044	0.695679	-1.12995	1.63336
(p.Tyr.67.Glu)	Y	67	E	var	2	0.604688	0.0237461	0.0186419	0.025785	0.0209496	0.0152165	-0.159497	0.532699	0.00860066	0.00930387	-0.0337478	0.181626	-3.81016	0.0640823	-0.0188903	0.020874	-1.08876	1.11158
(p.Tyr.67.Phe)	Y	67	F	var	2	0.740544	0.132313	-0.136927	0.0970969	-0.136348	0.0867986	1.15386	0.28895	0.0886744	0.130073	0.183027	0.0257765	1.2245	0.19509	0.0201866	0.163254	0.919261	0.501228
(p.Tyr.67.Gly)	Y	67	G	var	2	-3.57033	0.0235668	0.0591034	0.0277258	-0.000811212	0.0379875	-3.41434	0.764343	0.0847081	0.133539	0.0155091	0.0700653	-3.65104	0.0780241	-0.265373	0.339982	-3.08553	1.28205
(p.Tyr.67.His)	Y	67	H	var	2	-0.544434	0.47219	-0.17042	0.345668	0.0952997	0.180137	-0.631564	0.312621	-0.0504077	0.195411	0.145203	0.589342	-1.19095	0.383087	-0.101517	0.104538	-1.05071	0.661749
(p.Tyr.67.Ile)	Y	67	I	var	2	0.807324	0.142171	-0.00274069	0.122615	-0.14483	0.22726	1.37578	0.427522	0.0253407	0.188806	0.0177569	0.0822346	-1.02226	0.220276	0.253402	0.0166439	-0.109312	0.129604
(p.Tyr.67.Lys)	Y	67	K	var	2	-4.15131	0.000652865	-0.142287	0.213639	-0.0213509	0.0300729	-3.74949	0.654505	0.0948674	0.145493	0.143379	0.0973305	-3.59038	0.12886	-2.71037	0.293526	-4.25201	0.843172
(p.Tyr.67.Leu)	Y	67	L	var	2	0.195205	0.108195	-0.0389373	0.0916603	-0.108705	0.177612	0.123458	0.254812	0.031885	0.0393491	-0.0128458	0.220588	-2.77399	0.54414	0.125753	0.0052018	-1.72442	1.30092
(p.Tyr.67.Met)	Y	67	M	var	2	-0.361066	0.466862	0.0742455	0.0644259	-0.0355133	0.16709	-1.36392	0.73627	-0.109735	0.280983	-0.208205	0.441157	-3.56545	0.412784	0.107019	0.175033	-0.864801	0.691399
(p.Tyr.67.Asn)	Y	67	N	var	2	-0.703641	0.148528	0.0485353	0.123265	-0.0273418	0.0136139	-1.73697	0.568958	0.0528978	0.160833	0.0271597	0.195792	-2.56008	0.19018	0.17578	0.0366553	-1.34201	0.464813
(p.Tyr.67.Pro)	Y	67	P	var	2	-5.62613	0.292213	-0.586825	0.0326893	0.0910972	0.0169441	-5.8262	0.355306	-2.68009	0.175556	-0.115841	0.0445956	-3.71961	0.0867682	-3.38216	0.371565	-4.087	0.0290967
(p.Tyr.67.Gln)	Y	67	Q	var	2	-0.393479	0.0201936	-0.015105	0.0925611	-0.110139	0.0860601	-0.90423	0.594552	0.173448	0.195151	0.0989764	0.0483939	-3.83448	0.195282	0.0963235	0.0387503	-2.54424	1.23181
(p.Tyr.67.Arg)	Y	67	R	var	2	-4.73267	0.0343404	0.0339996	0.0559879	-0.0334286	0.0969878	-3.81348	0.809508	0.146806	0.0644539	0.0353548	0.0774155	-3.76066	0.181573	-0.946646	0.364226	-4.1454	0.882113
(p.Tyr.67.Ser)	Y	67	S	var	2	-0.323095	0.156436	-0.054972	0.00654494	-0.106353	0.153925	-1.34409	0.939499	0.0981446	0.00829835	0.134143	0.189106	-3.47752	0.245735	0.0996013	0.0605594	0.00582393	0.234968
(p.Tyr.67.Thr)	Y	67	T	var	2	0.531695	0.0818723	0.072267	0.141268	-0.0426309	0.223667	0.316106	0.453106	0.0248772	0.169593	0.144834	0.066908	-2.39962	0.456985	0.157993	0.114224	-0.746797	0.999045
(p.Tyr.67.Val)	Y	67	V	var	2	0.812611	0.27628	0.000355932	0.105669	-0.021441	0.0704393	1.26726	0.349962	0.0324747	0.0324832	-0.0055497	0.0385673	-0.391985	0.300874	0.0958227	0.045923	-0.113063	0.215701
(p.Tyr.67.Trp)	Y	67	W	var	2	-4.52224	0.128017	-0.234333	0.270496	-0.049726	0.0307507	-4.35444	1.1665	-0.131876	0.283047	0.00716959	0.0338465	-3.71907	0.124219	-1.36536	0.582028	-3.89748	0.873222
(p.67.=)	Y	67	Y	syn	2	-0.766784		-0.329184		-0.58016
(p.Pro.68.Ter)	P	68	*	var	2	-3.09161	0.327364	-3.63082	0.384307	-0.188845	0.0722362	-3.84141	0.876089	-2.93872	0.30707	-0.561254	0.443824	-3.23947	0.179456	-2.67196	0.265483	-3.26753	0.194639
(p.Pro.68.Ala)	P	68	A	var	2	0.446817	0.0889072	0.0348801	0.0369341	-0.0336336	0.0486546	0.781627	0.313345	0.157866	0.105565	0.126661	0.0391304	0.339597	0.0445544	0.151425	0.0161281	0.692024	0.359645
(p.Pro.68.Cys)	P	68	C	var	2	-2.57274	0.217819	-0.0516289	0.247963	0.0297163	0.0827341	-2.53499	0.489204	-0.129619	0.457448	-0.2064	0.29664	-2.82542	0.0364932	-0.122933	0.178705	-2.82279	1.20839
(p.Pro.68.Asp)	P	68	D	var	2	0.867523	0.124934	-0.0895936	0.0621754	-0.038465	0.039353	1.28437	0.789256	-0.0672173	0.115737	-0.0908803	0.528836	1.30677	0.336506	-0.0753318	0.0123052	2.07583	1.44536
(p.Pro.68.Glu)	P	68	E	var	2	0.850413	0.116042	-0.0923515	0.0113993	-0.0438722	0.0356029	1.29142	0.397511	0.0644648	0.156548	-0.0748794	0.125133	1.10784	0.0142866	0.0917625	0.0535338	1.28987	0.672558
(p.Pro.68.Phe)	P	68	F	var	2	0.933812	0.378586	0.100602	0.250493	-0.183856	0.43474	-0.203595	2.07932	0.330745	0.424491	0.376453	0.466159	-0.819284	1.71614	0.411357	0.521233	-1.3301	2.11251
(p.Pro.68.Gly)	P	68	G	var	2	0.868153	0.120805	0.0217077	0.0385373	0.00204256	0.12105	1.36629	0.417046	0.0519566	0.0945555	-0.0585947	0.0942415	0.809778	0.128403	0.0490729	0.00288219	1.60695	1.05823
(p.Pro.68.His)	P	68	H	var	2	1.08724	0.0562567	-0.0010227	0.597199	-0.0144376	0.205445	0.872858	0.280855	0.29121	0.534452	-0.237172	0.141917	0.184862	0.635914	0.333507	0.860581	0.537228	0.0199516
(p.Pro.68.Ile)	P	68	I	var	2	1.00443	0.450676	-0.257263	0.342734	0.196656	0.029663	0.975583	0.227613	-0.0334071	0.219453	-0.143431	0.0327225	0.239033	0.216846	0.0866123	0.261277	-0.106131	0.333625
(p.Pro.68.Lys)	P	68	K	var	2	0.710116	0.0949313	0.0146377	0.0309991	0.134965	0.172442	-1.42364	1.4695	-0.191756	0.377012	-0.237343	0.0901816	-1.2237	1.05173	-0.0484733	0.247433	-1.67334	0.945715
(p.Pro.68.Leu)	P	68	L	var	2	0.764707	0.124193	-0.0106605	0.0437629	0.0322177	0.0119477	1.04259	0.140579	0.0989467	0.071986	0.0357938	0.0133741	0.970382	0.0259455	0.0689897	0.013558	0.332558	0.1139
(p.Pro.68.Met)	P	68	M	var	2	0.972509	0.311837	0.116407	0.259151	0.116594	0.0779904	1.39065	0.386823	-0.180583	0.15208	-0.244019	0.0613822	1.2163	0.193136	-0.0528727	0.239728	1.41905	0.587733
(p.Pro.68.Asn)	P	68	N	var	2	0.874166	0.224162	0.10266	0.1696	-0.0381282	0.37314	1.51309	0.486585	0.658023	0.25601	0.223345	0.0866872	1.00027	0.21047	0.0789753	0.322774	1.1088	0.238585
(p.Pro.68.Gln)	P	68	Q	var	2	0.478112	0.174672	-0.0822119	0.0747748	-0.554881	0.745044	1.15733	0.00133531	-0.378946	0.00271136	0.0158987	0.715936	0.798997	0.244037	0.218929	0.660877	0.976266	0.337995
(p.Pro.68.Arg)	P	68	R	var	2	0.796171	0.0123195	-0.00716899	0.0583171	0.00628986	0.0458531	-0.854467	1.31479	0.0740988	0.210643	0.00173299	0.0663257	-0.626626	0.921384	0.00400257	0.190399	-1.21251	0.766279
(p.Pro.68.Ser)	P	68	S	var	2	0.691354	0.288238	-0.0765479	0.0986478	-0.144093	0.225441	1.18191	0.50778	0.117324	0.0961161	0.0280414	0.100906	0.953783	0.150046	0.188291	0.0209457	1.22104	0.975892
(p.Pro.68.Thr)	P	68	T	var	2	0.692695	0.0457804	-0.00453272	0.341347	0.0351456	0.0152731	1.16764	0.535289	-0.124942	0.0155516	-0.0854931	0.202691	0.849265	0.159255	-0.103228	0.113742	0.97433	0.744001
(p.Pro.68.Val)	P	68	V	var	2	0.909099	0.0264674	-0.0226506	0.258015	0.0459369	0.141206	1.12613	0.212789	0.117976	0.112211	-0.056736	0.0231144	0.910394	0.0946297	-0.00203424	0.0639847	-0.0468692	0.379335
(p.Pro.68.Trp)	P	68	W	var	2	0.836307	0.0787323	-0.101823	0.12234	-0.11071	0.0119724	1.26101	0.272371	0.104737	0.269311	-0.0697491	0.076395	-1.49679	0.64661	0.0768773	0.084597	0.447763	0.305765
(p.Pro.68.Tyr)	P	68	Y	var	2	1.00126	0.584667	0.050469	0.405996	0.013033	0.600715	1.38826	0.512878	0.256208	0.0295164	0.165102	0.198697	0.536666	0.496108	0.180758	0.0836465	0.3064	0.435368
(p.Ser.69.Ter)	S	69	*	var	2	-9.39872	0.077556	-3.04258	0.217722	-0.442744	0.159396	-7.89963	1.31259	-3.09463	0.704213	-0.93569	1.00396	-4.17253	0.166529	-3.02778	0.103419	-4.23852	0.730912
(p.Ser.69.Ala)	S	69	A	var	2	-5.45281	0.265654	0.0175466	0.0338695	0.0339408	0.0420842	-4.13498	0.796751	0.10583	0.0383217	0.0158326	0.0212248	-3.61722	0.0991117	-0.140752	0.0433252	-2.72923	1.01049
(p.Ser.69.Cys)	S	69	C	var	2	-6.35204	0.657991	-0.638846	0.240233	-0.0782516	0.0851385	-4.91587	0.793768	-1.50595	1.1287	0.241749	0.00841043	-3.29928	0.221184	-0.989996	0.454521	-4.16552	1.26048
(p.Ser.69.Asp)	S	69	D	var	2	-8.21196	1.19245	-2.88955	0.255475	0.143965	0.0823559	-7.29439	1.0366	-3.81117	0.284357	0.0331259	0.0310046	-3.78184	0.06873	-3.25645	0.231763	-4.66764	0.0343432
(p.Ser.69.Glu)	S	69	E	var	2	-5.56318	0.318839	-3.17783	0.329534	0.0482647	0.165343	-5.08688	0.624078	-2.83773	0.232658	0.0697076	0.0155089	-3.7383	0.154076	-2.68135	0.0994418	-3.70419	0.639218
(p.Ser.69.Phe)	S	69	F	var	2	-4.28829	0.251363	-3.3585	0.605142	0.0935196	0.0560183	-4.39119	0.40713	-3.73401	0.0153202	-0.178012	0.314488	-3.37899	0.269735	-3.04949	0.150889	-3.92834	0.169486
(p.Ser.69.Gly)	S	69	G	var	2	-6.9669	0.0997539	-0.284447	0.0322271	0.0295675	0.0685359	-4.93797	1.48014	-0.389509	0.49244	0.0266072	0.0696908	-3.74837	0.0383132	-1.42302	0.479336	-3.91189	0.639965
(p.Ser.69.His)	S	69	H	var	2	-7.29534	0.308041	-0.230316	0.473309	-0.143067	0.019064	-4.83017	1.31391	-0.0548671	0.387775	0.031368	0.0501861	-3.8648	0.271103	-0.479813	0.463164	-4.41979	0.332791
(p.Ser.69.Ile)	S	69	I	var	2	-8.80522	0.0596504	-2.73332	0.0851257	0.092027	0.241646	-6.31657	0.529109	-2.9523	0.334154	0.301621	0.0281659	-3.89146	0.860648	-2.86359	0.328525	-4.72209	0.51716
(p.Ser.69.Lys)	S	69	K	var	2	-8.56968	0.176933	-3.08203	0.775534	-0.0652352	0.170562	-7.06791	0.568549	-3.52392	0.369158	-0.262173	0.00708805	-3.83555	0.109075	-3.17733	0.116612	-4.47929	1.0836
(p.Ser.69.Leu)	S	69	L	var	2	-8.47528	1.24064	-2.99898	0.201293	0.0921495	0.039819	-7.1471	1.29527	-2.7812	0.430798	0.080647	0.0290111	-3.56886	0.00708435	-2.72034	0.351699	-4.32636	0.503596
(p.Ser.69.Met)	S	69	M	var	2	-5.38933	0.40213	0.0899104	0.161262	-0.00312159	0.240692	-3.80736	0.183667	0.268155	0.126793	0.104057	0.462238	-3.84469	0.225627	0.0714494	0.414924	-3.36963	1.22844
(p.Ser.69.Asn)	S	69	N	var	2	-5.74823	0.225148	0.0220221	0.0262037	-0.0574792	0.17102	-4.24376	0.174838	0.0271897	0.152095	-0.055064	0.252605	-3.813	0.0852331	-0.148433	0.0124452	-2.48983	0.702888
(p.Ser.69.Pro)	S	69	P	var	2	-4.03893	0.038916	-2.58431	0.375033	-0.202671	0.365094	-3.89966	0.398855	-2.59658	0.237753	-0.716344	0.809352	-3.14344	0.20454	-2.25664	0.109566	-3.30431	0.0759163
(p.Ser.69.Gln)	S	69	Q	var	2	-8.07278	0.907948	-1.14041	0.497095	0.104318	0.0284279	-5.7566	1.27924	-0.636687	0.385196	0.125937	0.126179	-3.74144	0.061021	-1.22058	0.229032	-4.11821	0.450466
(p.Ser.69.Arg)	S	69	R	var	2	-9.14507	0.0115397	-3.84432	0.367785	-0.424551	0.234493	-7.69584	0.456478	-3.95586	0.602648	-0.97733	1.04006	-4.07182	0.311457	-3.20385	0.205332	-4.63965	0.446654
(p.69.=)	S	69	S	syn	2	0.0388777	0.0614931	0.0621928	0.0761145	0.0928774	0.0960621	0.0366724	0.0725346	0.0472126	0.0872514	0.0227395	0.00383316	-0.0418017	0.00209162	0.0392388	0.02463	0.0341313	0.0614559
(p.Ser.69.Thr)	S	69	T	var	2	-3.63369	0.415681	0.0122959	0.0399586	-0.0729665	0.0865608	-3.22868	0.586855	0.247239	0.25209	0.146346	0.020431	-3.09539	0.275257	0.189087	0.179844	-2.4165	1.29438
(p.Ser.69.Val)	S	69	V	var	2	-7.33547	0.168679	-1.38599	0.20301	0.0607236	0.0388831	-5.46701	1.41957	-0.963756	0.320684	0.0169743	0.0408881	-3.71381	0.103178	-1.36302	0.221443	-4.09256	0.551374
(p.Ser.69.Trp)	S	69	W	var	2	-9.65533	0.524099	-5.38094	0.00411944	-0.543465	0.184376	-9.30277	1.62231	-5.65091	1.06271	-1.24742	1.26047	-4.30329	0.0168342	-3.59695	0.232692	-5.12833	0.0337293
(p.Ser.69.Tyr)	S	69	Y	var	2	-5.90226	0.759292	-1.66982	0.330806	0.208203	0.0828507	-4.79436	0.474926	-1.63114	0.384231	-0.478753	0.409364	-3.97614	0.131255	-1.95196	0.04722	-3.90915	0.0875847
(p.Asn.70.Ter)	N	70	*	var	2	-5.78441	0.170816	-3.67268	0.0198313	-0.436212	0.00408351	-8.26283	2.62471	-4.25792	0.319925	-1.10197	1.13319	-4.13001	0.392111	-3.12136	0.314644	-4.18721	0.565296
(p.Asn.70.Ala)	N	70	A	var	2	-1.03196	0.18881	0.0668607	0.0494754	-0.0101974	0.0738692	-4.88985	1.92929	0.00308537	0.473934	0.181578	0.122133	-3.27026	0.108001	0.148474	0.242534	-3.03719	1.61851
(p.Asn.70.Cys)	N	70	C	var	2	-6.83223	0.178796	-2.50735	0.21197	0.0681852	0.0313307	-6.63856	0.888864	-3.83058	0.160114	-0.249243	0.0966845	-3.66592	0.0742594	-3.18566	0.0328258	-4.34586	0.159508
(p.Asn.70.Asp)	N	70	D	var	2	-4.03306	0.110924	-2.4696	0.254204	0.0183185	0.172246	-4.53624	0.543822	-3.37532	0.0460052	-0.0330534	0.0149406	-3.49102	0.311348	-2.86981	0.286278	-3.67507	0.524746
(p.Asn.70.Glu)	N	70	E	var	2	-8.96921	0.917391	-5.43178	0.486671	0.0637968	0.0413186	-9.73034	0.256493	-5.48718	0.21715	-0.328457	0.336203	-4.46969	0.692256	-3.48199	0.0755903	-4.56366	0.226489
(p.Asn.70.Phe)	N	70	F	var	2	-7.84419	0.368602	-6.55269	0.996862	0.300635	0.176712	-8.12312	0.159832	-6.9599	0.850499	-1.31578	1.12924	-3.73771	0.224699	-3.91382	0.155885	-5.35322	0.267987
(p.Asn.70.Gly)	N	70	G	var	2	-5.25496	0.560391	0.0525799	0.00618444	-0.00266086	0.00166725	-6.47919	1.47604	-2.17781	0.957975	-0.0129546	0.0391472	-3.7392	0.122821	-2.07309	1.0029	-4.6149	0.538858
(p.Asn.70.His)	N	70	H	var	2	-7.03367	0.565766	-4.30699	0.141886	0.0368918	0.116308	-7.35595	1.75237	-4.93545	1.11608	-0.111356	0.0448532	-3.99521	0.0467442	-3.2383	0.0230679	-4.27548	0.10437
(p.Asn.70.Ile)	N	70	I	var	2	-6.08768	0.410366	-2.71122	0.33896	-0.0449336	0.0171633	-5.23959	1.40967	-3.25637	0.556773	-0.108069	0.331325	-3.35645	0.374827	-2.59378	0.0495802	-3.89369	0.176348
(p.Asn.70.Lys)	N	70	K	var	2	-4.60605	0.113702	-3.3087	0.0314386	-0.168561	0.438251	-4.53952	0.411678	-3.84552	0.496722	-0.695356	0.812186	-3.44385	0.400645	-2.9105	0.0294842	-3.82735	0.441406
(p.Asn.70.Leu)	N	70	L	var	2	-6.11292	0.422049	-3.72864	0.317199	-0.0115458	0.332	-7.66434	0.558751	-4.39361	0.659395	-0.252374	0.480175	-3.79462	0.0323633	-3.21184	0.0293737	-4.62286	0.259624
(p.Asn.70.Met)	N	70	M	var	2	-8.54321	0.249376	-0.974143	0.612479	-0.206403	0.0110845	-8.66685	0.180005	-4.5442	0.12322	-0.0380011	0.0614492	-3.93449	0.209487	-3.45755	0.0154884	-2.34478	1.36033
(p.70.=)	N	70	N	syn	2	0.161765	0.309474	0.144528	0.0886854	0.169492	0.257049	-0.194521	0.090991	-0.330209	0.122534	-0.181418	0.157983	-0.122447	0.134413	-0.222629	0.00861741	-0.0833746	0.15959
(p.Asn.70.Pro)	N	70	P	var	2	-9.28634	0.102865	-4.32714	0.442027	-0.340118	0.151444	-8.59404	0.849989	-5.40137	0.0324763	-1.20766	1.24178	-4.14374	0.322366	-3.4382	0.324107	-4.43667	0.274942
(p.Asn.70.Gln)	N	70	Q	var	2	-2.8043	0.099914	0.0502392	0.154601	-0.00964863	0.0339662	-4.18316	1.10303	-0.037885	0.184978	-0.0216803	0.0361892	-3.71357	0.340468	-0.0402993	0.157289	-3.23363	1.9023
(p.Asn.70.Arg)	N	70	R	var	2	-7.78581	0.944337	-3.24047	0.186162	0.00326553	0.0189259	-7.30341	0.566589	-4.37493	0.475186	0.0760351	0.0223725	-3.97891	0.409884	-3.36563	0.0444148	-4.51452	0.343145
(p.Asn.70.Ser)	N	70	S	var	2	0.357848	0.198625	-0.0341162	0.0179009	-0.030114	0.0725357	-3.25222	0.451365	-0.0113336	0.105947	-0.0324421	0.0092284	-2.40034	0.79044	-0.0498109	0.0251617	-2.19469	1.87148
(p.Asn.70.Thr)	N	70	T	var	2	-0.578484	0.1156	0.0631332	0.0546765	-0.000990254	0.00841297	-4.04546	1.2176	0.07776	0.308878	0.101915	0.0635599	-3.28139	0.0330716	0.113315	0.10931	-3.10837	1.43808
(p.Asn.70.Val)	N	70	V	var	2	-6.44404	0.305562	0.0386097	0.0420304	-0.0428254	0.0662073	-6.59361	0.324245	-3.11027	0.039076	0.0504873	0.0225488	-3.967	0.0836687	-2.04612	0.954255	-4.03685	1.35416
(p.Asn.70.Trp)	N	70	W	var	2	-9.05621	0.177396	-4.01081	0.301746	0.0899553	0.0910827	-8.56149	1.09108	-5.23731	1.26733	-0.575562	0.86185	-3.5968	0.0557719	-3.30058	0.452228	-5.22283	0.230914
(p.Asn.70.Tyr)	N	70	Y	var	2	-4.4694	0.387796	-3.83741	0.618966	-0.061613	0.0690748	-4.75533	0.584053	-3.7671	0.635952	-0.880324	0.833219	-3.44592	0.0397168	-3.15327	0.518817	-4.01523	0.161984
(p.Gly.71.Ter)	G	71	*	var	2	-5.36749	0.173164	-4.0607	0.140553	-0.465099	0.138472	-6.12791	0.432736	-4.04168	0.281548	-1.07172	1.12443	-3.89409	0.0483702	-3.01726	0.105012	-3.78491	0.0861649
(p.Gly.71.Ala)	G	71	A	var	2	-9.16997	0.501468	-4.34913	0.282246	0.0189658	0.0660339	-7.84624	0.250896	-5.22646	0.235028	-0.110854	0.318461	-3.94783	0.0474213	-3.63838	0.0993799	-4.77147	0.445119
(p.Gly.71.Cys)	G	71	C	var	2	-6.47856	0.424642	-4.45462	0.107164	0.0421356	0.0629492	-6.55341	0.227822	-4.50567	0.0447526	-0.615611	0.831462	-3.72639	0.209996	-3.13946	0.203817	-4.06497	0.229209
(p.Gly.71.Asp)	G	71	D	var	2	-3.54877	0.395329	-2.90577	0.161934	0.01084	0.12371	-4.16816	0.590331	-3.2792	0.394657	-1.03984	1.05473	-2.96909	0.045921	-2.6435	0.104711	-3.38168	0.185964
(p.Gly.71.Glu)	G	71	E	var	2	-6.21667	0.116094	-4.58426	0.687219	-0.183773	0.226733	-7.70066	0.95108	-4.39474	0.241564	-1.5195	1.35773	-3.74779	0.312436	-3.29405	0.043713	-4.63768	0.247479
(p.Gly.71.Phe)	G	71	F	var	2	-3.78221	0.0212141	-3.40711	0.138955	-0.498926	0.00608488	-4.45135	1.50766	-2.36608	0.324303	-0.937619	0.970445	-3.15445	0.0259999	-2.15192	0.219701	-3.69041	1.43915
(p.71.=)	G	71	G	syn	2	0.175477	0.0440839	0.012126	0.0454948	0.000713004	0.0430194	0.26925	0.0291791	0.0344948	0.041769	-0.0100896	0.0351763	0.173634	0.0364984	0.0573631	0.114118	0.173558	0.0712561
(p.Gly.71.His)	G	71	H	var	2	-7.053	1.03755	-7.2615	1.4903	0.0527971	0.144367	-7.757	1.77849	-5.96226	0.247048	-0.873946	0.936314	-3.98038	0.910959	-4.08512	0.190001	-4.34761	0.73669
(p.Gly.71.Ile)	G	71	I	var	2	-8.68366	0.879716	-6.2312	0.810884	-0.233576	0.482793	-8.28158	0.142188	-5.20332	0.161037	-1.2664	1.14138	-4.38633	0.3195	-3.90413	0.165216	-4.91086	0.0639338
(p.Gly.71.Lys)	G	71	K	var	2	-5.75098	0.494623	-4.3724	0.138365	-0.303639	0.193295	-6.23407	0.536691	-4.31648	0.114053	-1.07818	1.09046	-3.7729	0.092523	-3.23182	0.126049	-4.1976	0.369229
(p.Gly.71.Leu)	G	71	L	var	2	-8.2559	0.730949	-5.75893	0.389785	-0.400686	0.107414	-7.90995	0.359639	-5.77175	0.354493	-1.32202	1.28409	-4.1363	0.410751	-3.69298	0.099553	-4.66778	0.158399
(p.Gly.71.Met)	G	71	M	var	2	-6.52051	0.274523	-4.9688	0.376306	0.0152301	0.160287	-7.44418	0.785914	-4.86271	0.367078	-1.02177	1.31297	-4.17565	0.159449	-3.46483	0.108892	-4.34117	0.307005
(p.Gly.71.Asn)	G	71	N	var	2	-5.89443	0.0492496	-4.36022	0.441248	-0.027638	0.0755502	-7.30319	0.399906	-4.477	0.00397664	-0.0816144	0.295142	-3.90794	0.154486	-3.61263	0.0350147	-3.95728	0.2281
(p.Gly.71.Pro)	G	71	P	var	2	-5.33134	0.609024	-4.43229	0.167254	-0.314151	0.162149	-6.95824	0.790814	-4.10576	0.168286	-1.04524	1.02244	-3.5623	0.0837144	-3.32759	0.0878934	-4.08058	0.405069
(p.Gly.71.Gln)	G	71	Q	var	2	-8.41182	1.52881	-5.53036	0.2157	0.0183301	0.0201953	-8.37317	0.637461	-5.29895	0.285243	-0.34548	0.615326	-3.90051	0.134696	-3.73025	0.0254334	-4.59643	0.0861617
(p.Gly.71.Arg)	G	71	R	var	2	-6.19637	0.105187	-4.90888	0.131278	-0.369248	0.232581	-6.64559	0.796457	-4.58835	0.209908	-1.12401	1.13393	-3.86191	0.231338	-3.36583	0.229469	-4.35489	0.247017
(p.Gly.71.Ser)	G	71	S	var	2	-5.20226	0.116646	-0.894483	0.191458	0.0491272	0.116354	-5.69548	0.388847	-3.99069	0.144412	0.0123118	0.0727951	-3.59077	0.307075	-3.16423	0.0926866	-4.20415	0.248524
(p.Gly.71.Thr)	G	71	T	var	2	-7.46063	0.284577	-5.03762	0.0498346	0.0439117	0.0129607	-9.28261	0.889441	-5.4147	0.199611	-0.739952	1.06261	-3.89455	0.162254	-3.25403	0.0706653	-4.44077	0.14278
(p.Gly.71.Val)	G	71	V	var	2	-6.95177	0.0103431	-5.03854	0.632508	-0.0719775	0.132178	-7.10402	0.778347	-5.08532	0.250138	-1.18181	1.21762	-4.02239	0.0530741	-3.63559	0.160527	-4.45312	0.35976
(p.Gly.71.Trp)	G	71	W	var	2	-6.56672	0.0775383	-5.18412	0.100048	-0.385101	0.248495	-7.06821	1.16096	-4.9014	0.694645	-1.25597	1.27013	-4.07251	0.00444822	-3.44598	0.0677253	-4.7057	0.206152
(p.Gly.71.Tyr)	G	71	Y	var	2	-4.05247	0.145652	-3.49793	0.0536369	-0.254665	0.00783816	-5.02912	0.802724	-2.95086	0.0874519	-1.06806	1.1678	-2.79121	0.00644074	-2.72677	0.0632643	-4.28709	0.575791
(p.Leu.72.Ter)	L	72	*	var	2	-6.91789	0.289027	-4.88736	0.0313003	-0.449894	0.291748	-8.25175	0.504684	-4.6189	0.0193529	-1.26265	1.32166	-3.94181	0.20222	-3.24696	0.0606776	-4.62793	0.473348
(p.Leu.72.Ala)	L	72	A	var	2	-3.78165	0.215843	-0.00344378	0.0354628	-0.0718279	0.0825884	-4.01412	1.14125	0.0491295	0.145007	-0.0266962	0.0229149	-3.31595	0.391443	0.0794158	0.118493	-3.59881	1.53933
(p.Leu.72.Cys)	L	72	C	var	2	-7.68529	0.949333	-3.81718	0.0272079	0.0785719	0.0599956	-6.75041	0.224977	-3.36157	0.014752	0.0915246	0.135481	-3.88359	0.040157	-2.95755	0.22179	-4.30619	0.419204
(p.Leu.72.Asp)	L	72	D	var	2	-9.33299	0.0939972	-3.41575	0.28725	-0.109191	0.116335	-9.5414	0.303799	-4.1164	0.337467	-1.10276	1.07459	-3.95219	0.274913	-2.92743	0.320058	-4.64753	0.52793
(p.Leu.72.Glu)	L	72	E	var	2	-8.74816	1.47951	-4.19314	0.0660542	0.0706921	0.114869	-8.09317	0.638489	-4.11123	0.199044	-0.509689	0.7231	-3.99075	0.224656	-3.13278	0.10083	-4.78638	0.105246
(p.Leu.72.Phe)	L	72	F	var	2	-4.31735	0.089254	-0.832073	0.339531	-0.082482	0.303293	-4.47501	0.352724	-2.81527	0.195727	0.094869	0.01497	-3.12758	0.191366	-2.66717	0.181421	-3.89276	0.0188714
(p.Leu.72.Gly)	L	72	G	var	2	-5.96959	0.152961	0.0347424	0.0276817	-0.00754318	0.0783559	-4.27999	0.964616	0.0270276	0.202695	0.00444601	0.0368648	-3.62287	0.0162081	0.0326784	0.172016	-3.84012	0.78394
(p.Leu.72.His)	L	72	H	var	2	-4.74041	0.450377	-3.27045	0.979808	-0.476209	0.0870094	-4.8891	0.309795	-3.38018	0.0230421	-1.15729	0.979456	-3.53986	0.178222	-2.50984	0.156285	-3.64519	0.0430301
(p.Leu.72.Ile)	L	72	I	var	2	-1.79062	0.00946613	0.120925	0.11229	0.0821174	0.0158756	-2.74426	1.13753	0.102613	0.112703	-0.168572	0.236432	-1.93072	0.0700679	-0.0391332	0.126014	-1.60804	0.764494
(p.Leu.72.Lys)	L	72	K	var	2	-8.68895	0.687432	-5.16774	0.450663	-0.235661	0.170711	-7.78542	0.492874	-4.31853	0.472132	-1.03956	1.13157	-4.34982	0.113307	-3.26537	0.317365	-4.50655	0.386038
(p.72.=)	L	72	L	syn	2	-0.195314	0.120961	-0.00316122	0.144156	0.00193251	0.0644504	-0.485401	0.283592	0.0828492	0.0685072	-0.0903834	0.0149584	-0.395368	0.102839	-0.0340041	0.126281	-0.370644	0.464313
(p.Leu.72.Met)	L	72	M	var	2	0.570019	0.201607	-0.03016	0.106141	-0.0203462	0.00977635	0.903251	0.0739016	0.23648	0.350385	0.26029	0.153899	0.834546	0.219698	0.240794	0.288983	0.504095	0.430377
(p.Leu.72.Asn)	L	72	N	var	2	-7.91128	0.107753	-6.8273	1.27724	0.0632582	0.209339	-8.12009	0.379083	-7.45687	0.0758589	-0.893805	1.19837	-4.43938	0.985265	-3.62096	0.0771212	-4.92619	0.276373
(p.Leu.72.Pro)	L	72	P	var	2	-3.05799	0.114251	-2.53656	0.302568	-0.483034	0.291831	-3.01501	0.0568693	-2.50645	0.169452	-0.905352	0.925176	-2.64997	0.102876	-2.10668	0.273181	-2.88694	0.489073
(p.Leu.72.Gln)	L	72	Q	var	2	-9.60259	0.137439	-4.8196	0.231535	-0.0611318	0.0834608	-8.38377	0.0895431	-4.57785	1.22326	-0.0480104	0.450152	-4.02428	0.383966	-3.23436	0.0285993	-4.36687	0.495893
(p.Leu.72.Arg)	L	72	R	var	2	-7.96383	0.0570682	-4.28251	0.339254	-0.266079	0.114211	-7.411	0.415008	-4.34256	0.38251	-1.05808	1.06783	-4.08898	0.157335	-3.2805	0.340496	-4.66838	0.24274
(p.Leu.72.Ser)	L	72	S	var	2	-9.72683	0.0961609	-3.64133	0.193677	0.0852275	0.0912686	-7.53343	0.606621	-3.85534	0.00992049	0.00926826	0.11849	-3.90767	0.365303	-3.22685	0.0968214	-4.93205	0.312469
(p.Leu.72.Thr)	L	72	T	var	2	-7.83419	0.567713	-1.39682	0.361117	-0.0864188	0.106814	-7.81197	0.758445	-4.00605	0.391044	-0.132447	0.090563	-4.33627	0.261367	-2.79322	0.0225711	-4.79935	0.571198
(p.Leu.72.Val)	L	72	V	var	2	-4.46818	0.0683116	-0.0241348	0.0662502	0.023139	0.0427789	-3.88389	0.778004	0.0205957	0.0696406	-0.0806547	0.0167705	-3.61821	0.265958	-0.0222619	0.139584	-3.31995	1.20242
(p.Leu.72.Trp)	L	72	W	var	2	-9.81146	1.287	-4.42289	0.101471	-0.414748	0.242138	-7.92699	0.370606	-4.84943	0.590554	-1.30278	1.3043	-4.26917	0.181914	-3.43652	0.164195	-4.64565	0.315437
(p.Leu.72.Tyr)	L	72	Y	var	2	-8.53543	0.246453	-4.3868	0.365584	-0.297335	0.385925	-8.72519	0.209846	-5.41927	1.40249	-1.23697	1.05077	-4.10929	0.484051	-3.36209	1.12971	-4.77533	0.277999
(p.Ile.73.Ter)	I	73	*	var	2	-6.35167	0.149447	-3.69427	0.507995	-0.48819	0.278434	-6.23425	0.0677929	-3.80925	0.120958	-0.776729	0.941077	-3.84915	0.425407	-2.82674	0.409554	-4.29523	0.811119
(p.Ile.73.Ala)	I	73	A	var	2	-3.99083	0.0915663	0.110195	0.127257	-0.0352453	0.1122	-3.77654	0.957117	0.148503	0.158694	0.0791419	0.038222	-3.26904	0.289876	0.125466	0.129918	-3.5309	1.42534
(p.Ile.73.Cys)	I	73	C	var	2	-6.41023	0.532078	-2.14012	0.178025	0.101742	0.0642665	-6.18359	1.08225	-2.26427	0.619029	0.175215	0.164016	-3.97946	0.303794	-1.99348	0.18921	-3.75593	0.410732
(p.Ile.73.Asp)	I	73	D	var	2	-7.79299	0.06051	-3.5371	0.283321	-0.0498363	0.355052	-6.75113	1.20808	-3.34132	0.633318	-0.653263	0.742221	-4.08178	0.143671	-2.73217	0.0730054	-4.70496	0.584014
(p.Ile.73.Glu)	I	73	E	var	2	-6.7352	0.85866	-3.30835	0.0243926	0.0417866	0.00748515	-6.56896	0.562456	-3.23723	0.24572	-0.244869	0.376652	-3.85095	0.220381	-2.67147	0.0533915	-4.51137	0.367739
(p.Ile.73.Phe)	I	73	F	var	2	-3.2163	0.312107	-0.120023	0.112279	-0.0454503	0.0541421	-3.21018	0.147687	-2.04695	0.256195	-0.0366325	0.0467748	-2.95346	0.356095	-2.17877	1.62603	-3.56569	0.675879
(p.Ile.73.Gly)	I	73	G	var	2	-6.28037	0.0111817	-3.85539	0.178329	-0.0239663	0.00174552	-6.47039	0.889434	-3.7698	0.294767	-0.137018	0.377938	-3.86509	0.389183	-2.98483	0.206914	-4.43109	0.371377
(p.Ile.73.His)	I	73	H	var	2	-7.49912	0.119404	-6.20762	0.0706545	-0.622236	0.14289	-7.53805	0.598184	-6.08235	0.825778	-1.1923	1.8441	-4.22394	0.036171	-3.76797	0.153355	-4.92911	0.644224
(p.73.=)	I	73	I	syn	2	-0.0653354	0.164471	0.0616946	0.0108594	0.0334212	0.00778331	0.0890023	0.105783	0.220787	0.00502385	0.261157	0.0711656	0.0880946	0.102855	0.202884	0.102809	0.00318299	0.249077
(p.Ile.73.Lys)	I	73	K	var	2	-7.93991	0.247888	-4.83374	0.701534	-0.249005	0.0996098	-7.62536	0.0471176	-4.38896	0.430798	-0.977123	1.23438	-4.08752	0.21093	-3.58499	0.393952	-4.34748	0.0231673
(p.Ile.73.Leu)	I	73	L	var	2	-1.40204	0.11663	-0.0061807	0.0187994	-0.0423059	0.204226	-1.60731	0.656852	-0.0483224	0.282466	-0.0383081	0.0605068	-1.35444	0.434358	0.00483172	0.168995	-0.806186	0.563334
(p.Ile.73.Met)	I	73	M	var	2	-3.98037	0.193834	-0.0285332	0.0890811	0.000465156	0.130675	-3.65575	1.33198	0.198016	0.15645	0.0399671	0.0813027	-2.81072	0.516004	0.143595	0.156098	-3.29457	1.74034
(p.Ile.73.Asn)	I	73	N	var	2	-3.94624	0.284122	-4.02897	0.337136	-0.178777	0.0688609	-4.55031	0.556711	-4.09461	0.174975	-0.87613	0.821724	-3.00111	0.0179601	-2.72193	0.55891	-3.13565	0.259299
(p.Ile.73.Pro)	I	73	P	var	2	-6.97028	0.106594	-4.32856	0.437441	-0.114783	0.143753	-6.82285	0.0963621	-4.07812	0.506849	-1.13957	0.807119	-4.03909	0.0324955	-3.39703	0.16063	-4.77856	0.418692
(p.Ile.73.Gln)	I	73	Q	var	2	-7.69786	0.74723	-4.55614	0.503912	-0.094291	0.135125	-7.86592	1.24917	-4.76382	0.424828	-0.894877	1.03586	-3.76214	0.635809	-3.667	0.0940995	-4.83298	0.606382
(p.Ile.73.Arg)	I	73	R	var	2	-7.49819	0.60361	-4.00899	0.231343	-0.363927	0.178825	-6.92488	0.514955	-3.92666	0.47372	-0.940778	1.04873	-3.88822	0.275083	-2.97691	0.107324	-4.27669	0.501959
(p.Ile.73.Ser)	I	73	S	var	2	-5.43394	0.741035	-2.14273	0.470579	-0.0113042	0.147178	-5.2062	0.754886	-2.77773	0.297213	0.0600227	0.0233344	-3.51554	0.138453	-2.26059	0.301368	-3.88948	0.283942
(p.Ile.73.Thr)	I	73	T	var	2	-2.02824	0.416875	0.0271667	0.0946485	0.108806	0.126873	-2.72607	0.456607	0.00342669	0.183346	0.0883665	0.0400779	-2.28917	0.256238	0.0349099	0.00185247	-2.34792	0.367847
(p.Ile.73.Val)	I	73	V	var	2	-0.832919	0.0850428	0.0141745	0.00823625	-0.03442	0.077479	-1.19661	0.410556	0.0452299	0.149965	-0.0212529	0.0405376	-1.15429	0.501432	0.0813127	0.0439597	-0.71165	0.497716
(p.Ile.73.Trp)	I	73	W	var	2	-7.19306	0.548012	-4.18236	0.0406506	-0.230127	0.317747	-7.32866	0.401063	-4.11888	0.283832	-1.02169	1.0784	-4.02885	0.279265	-3.08728	0.0400491	-4.38571	0.635805
(p.Ile.73.Tyr)	I	73	Y	var	2	-4.08057	0.861577	-2.94682	0.446923	-0.371652	0.286039	-4.53929	0.636049	-2.77063	0.853938	-0.892122	0.513335	-2.96065	0.39962	-2.71541	0.461771	-2.89558	0.146385
(p.Val.74.Ter)	V	74	*	var	2	-6.80176	0.372584	-4.32529	0.583382	-0.455602	0.326261	-7.67628	1.18724	-4.74616	0.726161	-1.11928	1.14473	-4.24672	0.267504	-3.17589	0.217765	-4.47681	0.729579
(p.Val.74.Ala)	V	74	A	var	2	-2.4779	0.33624	-0.0302883	0.0585835	-0.0262298	0.0611823	-2.50782	0.484014	0.0258536	0.188579	0.0460386	0.14073	-2.31372	0.285386	0.060583	0.156222	-2.07456	0.814744
(p.Val.74.Cys)	V	74	C	var	2	-7.613	0.492573	-1.06826	0.522638	0.0483906	0.103338	-6.28132	3.01114	-0.920774	0.639557	0.0737489	0.0446895	-3.83343	0.0952045	-1.01929	0.162605	-4.08834	0.440044
(p.Val.74.Asp)	V	74	D	var	2	-4.52653	0.411378	-3.4881	0.0954315	-0.112345	0.0363069	-4.56968	0.182916	-3.39741	0.288182	-0.916517	0.956739	-3.42198	0.0426923	-2.99779	0.293179	-3.79222	0.337521
(p.Val.74.Glu)	V	74	E	var	2	-5.98978	0.619337	-3.34882	0.0322199	-0.104289	0.0945819	-6.36139	0.386807	-3.44343	0.0732636	-0.795154	0.940079	-3.8824	0.252431	-2.87399	0.0682566	-4.59148	0.330975
(p.Val.74.Phe)	V	74	F	var	2	-5.85075	0.361463	-3.63525	0.105686	-0.0605558	0.175521	-6.22	0.103818	-4.10334	0.606212	-0.126974	0.50409	-3.47378	0.208887	-2.84763	0.0696958	-4.29234	0.0682337
(p.Val.74.Gly)	V	74	G	var	2	-7.74262	0.0151314	-3.96248	0.310603	0.139359	0.189079	-7.55556	1.02896	-3.93768	0.190717	-0.415911	0.52294	-4.03006	0.0611471	-3.22969	0.214158	-4.4613	0.414878
(p.Val.74.His)	V	74	H	var	2	-7.14264	0.140309	-1.81743	0.340088	-0.135184	0.178339	-6.07505	1.58455	-1.88964	0.605609	-0.133725	0.327204	-3.01689	0.344221	-1.69848	0.165385	-5.25859	2.04983
(p.Val.74.Ile)	V	74	I	var	2	-0.646378	0.287565	-0.049887	0.220855	0.282079	0.13042	-1.69803	0.546033	0.00239491	0.139983	0.052357	0.0478208	-0.881639	0.0444551	0.170994	0.204376	-1.34913	1.30903
(p.Val.74.Lys)	V	74	K	var	2	-6.20043	0.0885128	-4.27361	0.665806	0.198183	0.0696418	-6.79833	0.441627	-4.37333	0.0739508	0.0240686	0.269341	-3.84032	0.298189	-3.61244	0.351424	-4.68654	0.00280123
(p.Val.74.Leu)	V	74	L	var	2	-3.62272	0.0195444	0.0861818	0.0994547	0.0193001	0.0274539	-3.54	1.00703	0.130714	0.227642	0.0839971	0.0156239	-3.2402	0.15854	0.0692739	0.166734	-3.23198	1.23709
(p.Val.74.Met)	V	74	M	var	2	-4.26473	0.229148	0.00477783	0.108156	0.0761554	0.148736	-4.6935	0.395426	-1.6699	1.37873	-0.107157	0.0850735	-3.78849	0.026236	-0.64299	0.787059	-4.38272	0.778371
(p.Val.74.Asn)	V	74	N	var	2	-6.99524	1.82363	-4.55003	0.337746	0.18106	0.150929	-6.73777	0.366545	-4.13731	0.0254435	-0.377565	0.840812	-4.32734	0.236775	-3.0454	0.37826	-4.62883	0.168757
(p.Val.74.Pro)	V	74	P	var	2	-5.70991	0.0610943	-4.86864	1.07965	-0.286359	0.00755648	-6.9034	0.71851	-4.74018	1.09959	-1.16744	1.14301	-3.71819	0.315981	-3.40959	0.102394	-4.39769	0.18623
(p.Val.74.Gln)	V	74	Q	var	2	-5.4717	0.567551	-3.60617	0.282329	0.121099	0.0278678	-6.2767	1.13242	-3.66244	0.230617	-0.31022	0.240439	-3.90241	0.237686	-2.62772	0.0984946	-4.54127	0.492541
(p.Val.74.Arg)	V	74	R	var	2	-5.75266	0.021413	-3.30633	0.0915171	-0.023544	0.0698931	-6.88069	0.782046	-3.35821	0.192947	-0.821289	0.91758	-3.87732	0.20981	-2.77139	0.318575	-4.32666	0.438737
(p.Val.74.Ser)	V	74	S	var	2	-6.58128	1.29253	-2.0402	0.564659	-0.00910278	0.0430911	-6.16401	1.02161	-2.80702	0.210196	0.0309236	0.139608	-3.84059	0.0100822	-2.5088	0.0269484	-4.21734	0.361477
(p.Val.74.Thr)	V	74	T	var	2	-4.52072	0.26872	0.104534	0.0678025	0.0013231	0.0204006	-4.22152	0.570329	0.0469916	0.266497	0.066451	0.0866256	-3.82085	0.133627	-0.0384069	0.0650206	-3.71661	1.60788
(p.74.=)	V	74	V	syn	2	-0.302763	0.0260524	0.00637696	0.0706724	-0.0152769	0.0442651	-0.544991	0.30164	0.0834343	0.122157	-0.0540308	0.145656	-0.531096	0.0564567	0.0220263	0.20597	-0.380876	0.272926
(p.Val.74.Trp)	V	74	W	var	2	-6.7589	0.291722	-3.74266	0.102394	-0.184216	0.120794	-7.66956	1.19518	-3.96769	0.525621	-1.03577	1.04812	-3.89278	0.301669	-3.19577	0.139689	-4.46125	0.11998
(p.Val.74.Tyr)	V	74	Y	var	2	-5.81235	0.927561	-3.03989	0.179503	0.0404548	0.0426151	-7.08109	1.12982	-3.75691	0.347131	-0.118431	0.250415	-3.9745	0.274336	-2.96981	0.467817	-5.36095	0.0446719
(p.Arg.75.Ter)	R	75	*	var	2	-4.74955	0.0898734	-1.91944	0.032262	-0.135329	0.181348	-5.17964	0.583713	-1.96052	0.102413	-0.53964	0.533921	-3.66903	0.192437	-1.85014	0.065301	-3.46658	0.7006
(p.Arg.75.Ala)	R	75	A	var	2	-0.274376	0.0202155	0.0598989	0.0550682	-0.0589188	0.143934	-0.513133	0.367536	0.142405	0.144874	0.0846423	0.0326522	-0.260791	0.189767	0.14601	0.126325	-0.332026	0.403539
(p.Arg.75.Cys)	R	75	C	var	2	-3.30544	0.367076	-1.92728	0.132107	-0.0236635	0.0551148	-3.5457	0.0406441	-2.24045	0.537977	0.0765031	0.0692324	-2.68472	0.227114	-2.03655	0.0490558	-3.33923	0.248681
(p.Arg.75.Asp)	R	75	D	var	2	-2.92672	0.203497	0.0795838	0.0740962	0.0222211	0.00132093	-3.44016	1.19572	0.0721557	0.301034	0.150586	0.120564	-2.57627	0.425946	0.0382584	0.210057	-3.48016	0.979263
(p.Arg.75.Glu)	R	75	E	var	2	-0.292357	0.0902665	0.0506938	0.0740963	-0.0376414	0.0777332	-0.458111	0.336983	0.0499693	0.152319	0.0212707	0.0357753	-0.151238	0.108782	0.0872089	0.0608476	-0.431069	0.398168
(p.Arg.75.Phe)	R	75	F	var	2	-2.59029	0.140716	-0.0344141	0.217852	-0.143899	0.0372575	-3.3396	0.365338	0.334607	0.375602	0.140441	0.112811	-2.63544	0.0905878	0.222725	0.168463	-3.64445	1.15919
(p.Arg.75.Gly)	R	75	G	var	2	-1.63978	0.0411707	0.0598024	0.0236018	0.0107745	0.110648	-2.48178	0.754235	0.066666	0.0974288	-0.0126381	0.00969054	-1.73142	0.441899	0.063088	0.0399517	-2.05703	0.988997
(p.Arg.75.His)	R	75	H	var	2	-0.954686	0.00336074	0.00230623	0.0127974	0.0280592	0.115262	-1.2751	0.5693	-0.108506	0.00488869	0.200666	0.105318	-1.38014	0.072732	0.0668978	0.12673	-1.37038	0.448752
(p.Arg.75.Ile)	R	75	I	var	2	-0.597768	0.0526215	-0.012653	0.00140912	0.0166241	0.00514299	-1.5216	0.646951	0.0508357	0.152983	-0.00683164	0.208527	-0.670115	0.144747	-0.00732682	0.0613755	-1.5421	1.06686
(p.Arg.75.Lys)	R	75	K	var	2	-1.7625	0.0387016	0.0918314	0.0212441	0.0928191	0.125485	-2.16249	0.722223	0.140107	0.208493	0.0962339	0.0529344	-1.87438	0.0970341	-0.046607	0.24974	-1.59162	0.359037
(p.Arg.75.Leu)	R	75	L	var	2	0.0216566	0.123733	-0.0583384	0.00973846	-0.105154	0.0644267	0.0155572	0.0950256	0.069925	0.0903503	0.0784747	0.0978546	0.144507	0.0744326	0.0697651	0.0062474	0.0116055	0.169679
(p.Arg.75.Met)	R	75	M	var	2	0.0913346	0.0569565	0.179439	0.0737659	0.104173	0.239369	-0.199626	0.554155	0.0418349	0.142754	0.104373	0.00927056	-0.0332204	0.0166864	-0.0544775	0.147715	-0.398159	0.499314
(p.Arg.75.Asn)	R	75	N	var	2	-3.36032	0.299617	0.0689965	0.0221282	-0.0598844	0.209449	-3.88211	0.74602	0.100596	0.0240806	-0.0932341	0.121624	-3.26803	0.156246	-0.068221	0.0941833	-3.29909	0.509183
(p.Arg.75.Pro)	R	75	P	var	2	-4.37063	0.481377	-2.59418	0.0548333	0.0983472	0.00789276	-4.82987	0.321881	-2.48222	0.67442	0.0352839	0.210904	-3.53342	0.133367	-2.58199	0.55874	-4.30313	0.775912
(p.Arg.75.Gln)	R	75	Q	var	2	-0.0096742	0.0123934	-0.0629113	0.0659845	-0.152433	0.140728	-0.106188	0.0549237	-0.174385	0.126929	-0.115394	0.0806833	-0.0165863	0.143658	-0.0845414	0.0867424	-0.205805	0.158221
(p.75.=)	R	75	R	syn	2	0.179858	0.134172	-0.0247959	0.0184378	0.0149366	0.0755084	0.354308	0.0210765	0.047674	0.0909284	-0.0535391	0.0768772	0.303808	0.048803	0.00546372	0.0934161	0.208174	0.0499987
(p.Arg.75.Ser)	R	75	S	var	2	0.332544	0.0546333	0.0342411	0.102505	0.0278913	0.0379013	0.123197	0.236846	0.103219	0.297516	-0.147671	0.0690274	0.206892	0.0746534	0.0221213	0.18398	0.0821827	0.100881
(p.Arg.75.Thr)	R	75	T	var	2	-0.473549	0.20627	0.157839	0.106989	0.0569136	0.00646653	-1.36933	0.889953	0.00504499	0.0800581	-0.0376758	0.00293644	-0.679347	0.0523663	-0.0759705	0.261785	-1.19392	0.566957
(p.Arg.75.Val)	R	75	V	var	2	-0.181376	0.0120596	0.0100332	0.0213537	0.00550924	0.05276	-0.714339	0.643084	0.0632865	0.0689952	-0.0111751	0.0234923	-0.110129	0.339927	-0.0234971	0.0746575	-0.607712	0.578096
(p.Arg.75.Trp)	R	75	W	var	2	-2.26636	0.290642	0.0396021	0.046418	0.117268	0.134338	-3.20829	0.778666	0.020779	0.274185	0.0748372	0.089287	-2.67069	0.419457	0.0189519	0.227783	-3.16232	1.10378
(p.Arg.75.Tyr)	R	75	Y	var	2	-3.08755	0.608367	0.0327343	0.180504	-0.0289543	0.0869218	-3.83722	1.6864	0.127228	0.499623	-0.0834891	0.529664	-2.61399	1.03331	0.0770789	0.407021	-3.86393	2.00149
(p.Asp.76.Ter)	D	76	*	var	2	-7.39335	1.45973	-4.20393	0.356078	-0.171834	0.251063	-8.46777	0.75256	-4.34611	0.187114	-0.835389	0.903187	-3.9797	0.259039	-3.30643	0.00310435	-4.27833	0.603539
(p.Asp.76.Ala)	D	76	A	var	2	-0.965437	0.161635	-0.0643481	0.00625113	-0.153185	0.103166	-2.90858	1.31383	0.011057	0.181808	0.0200713	0.139331	-1.66332	0.752707	0.102552	0.0807674	-2.49253	1.81391
(p.Asp.76.Cys)	D	76	C	var	2	-4.46816	0.494105	0.00785382	0.126775	-0.0903085	0.0227129	-5.19548	1.47686	-0.727641	1.26468	0.0517121	0.104252	-3.73145	0.2717	-0.568254	0.667996	-3.97847	0.46159
(p.76.=)	D	76	D	syn	2	0.195987	0.0900563	0.0218368	0.00186318	0.0615002	0.0175107	0.0680517	0.13703	0.00521331	0.20076	0.0299574	0.139292	-0.0518647	0.0133786	-0.0405434	0.158858	0.158261	0.276402
(p.Asp.76.Glu)	D	76	E	var	2	-0.347305	0.139623	-0.0267479	0.142818	-0.0100459	0.0258965	-0.584681	0.182498	0.0265344	0.0561885	-0.14007	0.09097	-0.477895	0.0753138	0.0184837	0.0298679	-0.665223	0.181607
(p.Asp.76.Phe)	D	76	F	var	2	-1.71268	0.0374165	-0.0911514	0.125811	-0.0732261	0.147714	-2.70287	1.27465	0.0610668	0.507381	0.123222	0.383547	-2.18659	0.984322	0.0403746	0.62746	-2.32272	1.2862
(p.Asp.76.Gly)	D	76	G	var	2	-0.360854	0.036516	-0.00291195	0.0620261	-0.0322535	0.148008	-1.53679	0.995939	0.0181148	0.208534	-0.0825677	0.00934575	-0.725804	0.483456	0.104318	0.143124	-1.26821	1.17629
(p.Asp.76.His)	D	76	H	var	2	-0.416678	0.0463881	-0.038307	0.170122	-0.107949	0.236203	-2.24193	1.55553	0.0591089	0.350291	-0.100666	0.114465	-1.07398	0.645394	0.0819562	0.1975	-1.84191	1.78249
(p.Asp.76.Ile)	D	76	I	var	2	-7.0868	0.55579	0.00678436	0.077321	-0.0370339	0.179957	-6.65753	1.40168	-2.97987	0.663603	-0.00798029	0.0495995	-3.94398	0.151083	-1.76156	1.02947	-4.87826	0.31687
(p.Asp.76.Lys)	D	76	K	var	2	-4.25572	0.448669	0.0738327	0.152858	-0.07124	0.196244	-4.69607	1.50749	-0.281515	0.863251	-0.0777487	0.278009	-3.87658	0.440432	-0.207837	0.376227	-4.12964	0.576942
(p.Asp.76.Leu)	D	76	L	var	2	-5.63298	0.019634	0.0586341	0.0360124	-0.137533	0.141438	-6.65943	1.1079	-2.24578	0.847041	-0.0219653	0.0904035	-3.96391	0.297745	-1.30304	0.99359	-4.44347	0.34425
(p.Asp.76.Met)	D	76	M	var	2	-2.7849	0.0266938	-0.0370199	0.231276	-0.157155	0.147543	-3.93235	0.644586	0.0455453	0.13665	-0.17568	0.276774	-4.14841	0.569489	0.101382	0.221999	-3.0738	0.929092
(p.Asp.76.Asn)	D	76	N	var	2	-0.716639	0.334022	-0.209895	0.287045	0.0564159	0.223871	-2.41174	1.15167	-0.486007	0.114677	-0.283607	0.0401866	-1.15261	0.0866181	-0.347539	0.0969723	-1.59711	0.918764
(p.Asp.76.Pro)	D	76	P	var	2	-6.60325	0.224244	-4.13004	0.505113	-0.130113	0.0965982	-9.02795	0.335485	-4.19481	0.0517577	-0.791686	1.03928	-3.93079	0.509016	-3.52982	0.393395	-4.43612	0.31579
(p.Asp.76.Gln)	D	76	Q	var	2	-4.29201	0.224291	0.0744428	0.0217167	0.017193	0.150009	-3.96009	0.56051	-0.204872	0.398516	0.0856312	0.183634	-3.80469	0.423787	-0.0663287	0.0547748	-3.80541	1.25397
(p.Asp.76.Arg)	D	76	R	var	2	-5.14841	0.264819	0.00991419	0.0868411	0.00858124	0.153303	-6.1485	1.39546	-2.22288	1.01735	-0.0676953	0.0299685	-3.88488	0.166683	-1.37856	1.23011	-4.40023	0.445004
(p.Asp.76.Ser)	D	76	S	var	2	-0.664633	0.0786564	-0.0476671	0.0163154	-0.185129	0.0903007	-2.18195	1.17666	0.00828287	0.308265	0.0414383	0.167463	-1.08735	0.674931	0.128459	0.120506	-1.82755	1.5872
(p.Asp.76.Thr)	D	76	T	var	2	-4.64538	0.236554	0.00715169	0.297967	-0.0459117	0.261284	-4.49297	1.45463	-0.0931265	0.260869	-0.0377328	0.041713	-3.97278	0.123361	-0.0132807	0.229065	-4.64928	1.13115
(p.Asp.76.Val)	D	76	V	var	2	-4.78283	0.311159	0.0369296	0.0259796	-0.0277839	0.137132	-4.8361	0.801015	-1.40644	1.25266	-0.0307633	0.0317584	-3.91873	0.348158	-0.583137	0.801245	-4.34377	0.402191
(p.Asp.76.Trp)	D	76	W	var	2	-0.72843	0.0829352	0.0611845	0.046079	-0.0767392	0.262522	-1.17235	0.962903	-0.00641126	0.266926	0.116369	0.121304	-0.663351	0.222537	0.0622932	0.198019	-0.92719	0.769596
(p.Asp.76.Tyr)	D	76	Y	var	2	-1.04289	0.0106017	-0.0642413	0.0304421	0.0571373	0.0495523	-3.00822	1.2373	0.1151	0.242988	-0.0228742	0.0834411	-1.84904	1.10592	0.151236	0.33308	-2.40258	1.71106
(p.Gly.77.Ter)	G	77	*	var	2	-4.13177	0.204648	-1.60252	0.221766	-0.138418	0.114775	-4.55078	0.517635	-1.76352	0.0915877	-0.543153	0.579869	-3.63468	0.023683	-1.7796	0.207493	-3.22649	0.548561
(p.Gly.77.Ala)	G	77	A	var	2	-0.823339	0.0276841	-0.0563536	0.0609794	-0.106789	0.152091	-1.04748	0.521571	0.0640688	0.136454	0.0575772	0.0164434	-0.908725	0.308093	0.126891	0.0910058	-0.662799	0.485262
(p.Gly.77.Cys)	G	77	C	var	2	-3.65791	0.030483	-0.142527	0.0344188	-0.0901184	0.0864511	-3.83415	0.849496	-0.0705341	0.351813	0.000743388	0.143951	-2.9043	0.0262879	-0.181345	0.263372	-3.17592	0.886814
(p.Gly.77.Asp)	G	77	D	var	2	0.287014	0.0175684	0.0210698	0.15945	-0.0625203	0.128812	0.399364	0.0434124	0.130147	0.306674	0.00230072	0.122814	0.398944	0.0154661	0.0799105	0.108711	0.349244	0.353768
(p.Gly.77.Glu)	G	77	E	var	2	-0.342796	0.0580965	0.07377	0.236956	0.0706451	0.0380434	-0.626727	0.0862353	0.00399642	0.0281253	-0.0213207	0.128788	-0.0449131	0.146091	-0.0191062	0.0880122	-0.159162	0.205112
(p.Gly.77.Phe)	G	77	F	var	2	-1.36738	0.0567838	0.256158	0.0257036	0.0448495	0.180507	-1.87479	0.629579	0.0619602	0.0476083	-0.162645	0.27799	-1.46162	0.121067	-0.117649	0.150091	-1.49099	0.368556
(p.77.=)	G	77	G	syn	2	0.0881446	0.00906809	0.0677085	0.113534	0.0229895	0.0556589	0.0620615	0.00788826	-0.0393582	0.018835	-0.0560934	0.072901	0.0154486	0.0150952	-0.0522075	0.00105792	0.0673071	0.051863
(p.Gly.77.His)	G	77	H	var	2	-0.221998	0.148811	0.0248655	0.27024	-0.0574827	0.108458	-0.319909	0.324693	-0.317959	0.0865933	-0.0343088	0.0098125	-0.323806	0.308021	-0.16977	0.136582	-0.20822	0.0566631
(p.Gly.77.Ile)	G	77	I	var	2	-1.24263	0.0443082	0.0947966	0.308037	0.176368	0.00644899	-1.45457	0.228158	0.0532923	0.113008	0.121998	0.0456222	-1.03679	0.0568227	-0.157925	0.0149555	-1.07104	0.600279
(p.Gly.77.Lys)	G	77	K	var	2	-0.712827	0.0443481	0.151538	0.0252686	0.265797	0.000572885	-1.62036	0.555247	0.136707	0.152105	0.152986	0.102902	-1.25214	0.0511482	-0.0960138	0.0193943	-1.09096	0.634361
(p.Gly.77.Leu)	G	77	L	var	2	-1.36207	0.0171444	0.0572923	0.0671127	0.0245199	0.0248928	-1.72181	0.499061	0.0486782	0.161835	0.00976077	0.038292	-1.547	0.144567	0.10772	0.0458971	-1.29998	0.590708
(p.Gly.77.Met)	G	77	M	var	2	-1.23327	0.172914	0.0374038	0.0968592	0.0429892	0.0427055	-1.80208	0.994089	0.03729	0.112718	-0.0335868	0.141776	-1.64824	0.387172	0.018077	0.00864286	-1.36037	0.717627
(p.Gly.77.Asn)	G	77	N	var	2	-0.11666	0.1005	0.251938	0.154043	0.180728	0.347105	-0.164241	0.0824189	-0.191653	0.166574	0.0601971	0.253536	-0.239774	0.217165	-0.0190454	0.0075436	-0.27368	0.11174
(p.Gly.77.Pro)	G	77	P	var	2	-3.83818	0.323865	-1.98201	0.0587544	0.0869293	0.189637	-4.78866	0.735977	-2.15448	0.121363	-0.0369972	0.156796	-2.9336	0.243669	-1.83935	0.0881895	-3.28179	0.600123
(p.Gly.77.Gln)	G	77	Q	var	2	-0.347356	0.045526	0.145015	0.161397	0.149992	0.0877276	-0.808244	0.520424	0.0699687	0.120588	-0.0085586	0.164959	-0.777968	0.229974	-0.0217894	0.0674958	-0.672684	0.454122
(p.Gly.77.Arg)	G	77	R	var	2	-0.413279	0.0740644	-0.00900405	0.0822492	0.000778272	0.0648923	-0.624935	0.398647	0.120348	0.181803	0.0823228	0.0390049	-0.57461	0.181172	0.0607075	0.0908308	-0.514306	0.468736
(p.Gly.77.Ser)	G	77	S	var	2	-0.658431	0.212237	-0.0374566	0.0599209	-0.0345304	0.284921	-0.821585	0.317066	0.0742408	0.281559	0.00996187	0.0242783	-0.769544	0.0776639	0.0342021	0.137524	-0.495476	0.178494
(p.Gly.77.Thr)	G	77	T	var	2	-1.05088	0.0567737	0.181024	0.040768	0.0222153	0.070325	-1.3563	0.624201	0.188974	0.173698	0.0886996	0.088459	-1.08963	0.0481921	0.201986	0.0815143	-1.07825	0.68842
(p.Gly.77.Val)	G	77	V	var	2	-0.518043	0.0549487	0.119157	0.100649	0.0304696	0.0176246	-0.848494	0.457191	0.0994721	0.234927	-0.0119842	0.0171286	-0.645588	0.253645	0.0696613	0.213935	-0.7105	0.521337
(p.Gly.77.Trp)	G	77	W	var	2	-2.54828	0.0253579	0.0422295	0.00143766	-0.0851631	0.0955633	-2.68854	0.72776	0.0948091	0.0681686	-0.0404069	0.152502	-2.25963	0.0622354	0.0486322	0.0907027	-2.33306	0.800696
(p.Gly.77.Tyr)	G	77	Y	var	2	-1.11088	0.116409	0.153661	0.288144	0.126842	0.145129	-1.8508	0.39056	0.114938	0.191273	0.0459188	0.0920479	-1.05364	0.371051	0.0385225	0.0418792	-1.79137	1.40712
(p.Asp.78.Ter)	D	78	*	var	3	-3.9435	0.514186	-1.36294	0.125137	-0.434886	0.762301	-5.36117	0.699613	-1.60114	0.0349927	-0.296094	0.32695	-4.05853	0.298752	-1.6427	0.156484	-3.42251	1.37349
(p.Asp.78.Ala)	D	78	A	var	3	-0.200509	0.252372	0.129169	0.200366	0.0696508	0.028716	-0.587531	0.191356	0.218163	0.0868312	0.00118349	0.0258699	-0.463253	0.0494658	0.260398	0.107006	-0.347557	0.487243
(p.Asp.78.Cys)	D	78	C	var	3	-3.05685	0.935552	0.169833	0.0529651	0.168611	0.132497	-4.01997	0.148731	0.17159	0.0973853	0.0826543	0.0444728	-2.74254	0.371014	-0.0263823	0.110096	-3.24577	0.321085
(p.78.=)	D	78	D	syn	3	-0.420679	0.187554	-0.0564047	0.0411374	-0.11713	0.049869	-0.549853	0.3203	-0.0342983	0.150361	0.0835736	0.152103	-0.293207	0.174317	0.167579	0.235522	-0.450835	0.446055
(p.Asp.78.Glu)	D	78	E	var	3	0.180689	0.21272	0.182583	0.18188	0.175897	0.269891	0.0107952	0.0975587	0.123992	0.0810634	0.0729565	0.0195276	0.0372184	0.0448601	0.156685	0.171519	0.0590267	0.185385
(p.Asp.78.Phe)	D	78	F	var	3	-0.259467	0.155245	0.175085	0.0323635	0.0296519	0.266167	-0.756271	0.249718	0.156578	0.117247	0.0755468	0.340925	-0.47864	0.395938	-0.0584837	0.224517	-1.378	1.17801
(p.Asp.78.Gly)	D	78	G	var	3	0.0578457	0.183213	0.154601	0.141912	0.11374	0.116827	-0.272525	0.120379	0.135212	0.022195	0.00596483	0.0491951	-0.272763	0.0622137	0.137415	0.0148349	-0.202167	0.239846
(p.Asp.78.His)	D	78	H	var	3	-0.27877	0.0156264	0.140722	0.030273	0.0180544	0.280247	-0.739722	0.0188444	0.283532	0.171407	0.12557	0.201609	-0.500049	0.12769	0.318477	0.136543	-0.507427	0.782681
(p.Asp.78.Ile)	D	78	I	var	3	-0.243184	0.235545	0.0773231	0.140647	0.203359	0.156097	-0.670574	0.0178531	0.136978	0.255164	0.234721	0.213214	-0.504886	0.535603	0.0185478	0.0679425	-0.655842	0.460006
(p.Asp.78.Lys)	D	78	K	var	3	0.00259451	0.210682	0.207808	0.1388	0.147366	0.0221078	-0.712403	0.227951	0.242069	0.0642088	0.120463	0.0828394	-0.56214	0.124233	0.217801	0.068495	-0.494596	0.13063
(p.Asp.78.Leu)	D	78	L	var	3	-0.553747	0.00793547	0.19724	0.105398	0.116745	0.0888249	-0.791021	0.440708	0.298786	0.240607	0.365194	0.0250504	-0.59191	0.203579	0.383206	0.263632	-0.555128	0.775235
(p.Asp.78.Met)	D	78	M	var	3	0.167682	0.072624	0.340173	0.223673	0.0581357	0.206946	-0.382264	0.210354	0.186415	0.125276	-0.107586	0.397709	-0.34578	0.577401	0.00156986	0.241202	-0.178463	0.151695
(p.Asp.78.Asn)	D	78	N	var	3	-0.066549	0.361702	-0.159791	0.216202	0.0368429	0.494404	0.208181	0.320775	-0.0685899	0.170243	0.126061	0.0751449	-0.0620834	0.0860006	-0.173667	0.224445	-0.210366	0.158987
(p.Asp.78.Pro)	D	78	P	var	3	-0.459904	0.403196	0.0737051	0.234979	-0.0557817	0.133656	-1.17631	0.0383924	0.0542242	0.0417966	-0.174878	0.0661189	-0.73487	0.129216	0.180908	0.105911	-0.700676	0.583267
(p.Asp.78.Gln)	D	78	Q	var	3	0.0854838	0.235348	0.289907	0.0439845	0.317605	0.042675	-0.378486	0.0219233	0.139824	0.0953624	-0.117678	0.0213149	-0.352637	0.332369	0.117743	0.037769	-0.348931	0.181241
(p.Asp.78.Arg)	D	78	R	var	3	0.073042	0.299052	0.162371	0.151996	0.156072	0.0370608	-0.268642	0.095899	0.128417	0.061877	-0.0591591	0.0768705	-0.252316	0.0146548	0.0974938	0.0605327	-0.304998	0.267405
(p.Asp.78.Ser)	D	78	S	var	3	0.0584326	0.385367	0.299771	0.405117	0.208422	0.226877	-0.307165	0.037546	0.159687	0.0369236	-0.0244468	0.170237	-0.374494	0.166387	0.154636	0.138869	-0.240193	0.173656
(p.Asp.78.Thr)	D	78	T	var	3	-0.146566	0.361034	0.0917764	0.240248	-0.0332871	0.00822032	-0.408881	0.0554083	0.189973	0.00800218	0.0362665	0.00953846	-0.514337	0.163518	0.184716	0.0810472	-0.500527	0.502051
(p.Asp.78.Val)	D	78	V	var	3	-0.169086	0.297644	0.180223	0.188201	0.126749	0.0343708	-0.656403	0.355016	0.152474	0.109603	-0.0104985	0.00369968	-0.521089	0.023098	0.135988	0.118637	-0.542144	0.603969
(p.Asp.78.Trp)	D	78	W	var	3	-0.254726	0.369401	0.284304	0.324753	0.194393	0.341842	-1.19243	0.0755729	0.284076	0.102065	0.117816	0.233854	-0.976561	0.346334	0.0993168	0.339867	-1.17745	0.547785
(p.Asp.78.Tyr)	D	78	Y	var	3	-0.370452	0.0887612	0.341256	0.055083	0.067851	0.202221	-0.72598	0.386454	0.443491	0.0735039	0.138389	0.0373049	-0.608951	0.309794	0.44763	0.111005	-0.717757	0.688621
(p.Glu.79.Ter)	E	79	*	var	3	-3.87926	0.469616	-1.35542	0.26467	-0.51137	0.743567	-5.36397	0.0926388	-1.66199	0.0991096	-0.440179	0.254681	-4.15914	0.424529	-1.67887	0.112771	-4.15344	1.36245
(p.Glu.79.Ala)	E	79	A	var	3	-0.10269	0.210481	0.174159	0.0719131	0.148695	0.102471	-0.54111	0.394734	0.060992	0.0144962	0.0261701	0.0643012	-0.394086	0.0292952	0.0868094	0.117587	-0.654369	0.723615
(p.Glu.79.Cys)	E	79	C	var	3	-2.4931	0.610645	0.300444	0.406438	0.213164	0.0458283	-2.99175	0.141357	0.186606	0.0635371	0.0729852	0.0188442	-2.81144	0.341465	0.127387	0.0248649	-2.66854	0.579952
(p.Glu.79.Asp)	E	79	D	var	3	-0.580536	0.44212	0.192711	0.0108894	0.142347	0.0784658	-1.12072	0.099108	0.113737	0.00468339	-0.0862535	0.117411	-0.999926	0.108123	0.127919	0.0677553	-1.24365	0.785975
(p.79.=)	E	79	E	syn	3	-0.279238	0.20626	0.102685	0.145012	0.14909	0.00485926	-0.600248	0.177653	0.216479	0.0417474	0.110775	0.0162685	-0.557289	0.142545	0.107398	0.0418954	-0.544332	0.559981
(p.Glu.79.Phe)	E	79	F	var	3	-1.32576	0.264563	0.379887	0.32468	-0.026109	0.594611	-1.97411	1.18232	0.261288	0.705888	0.281108	0.20109	-1.55682	0.867387	-0.110177	0.0282737	-2.39884	1.8201
(p.Glu.79.Gly)	E	79	G	var	3	-0.295606	0.262016	0.180046	0.10879	0.107896	0.094855	-0.70189	0.228975	0.20155	0.00609673	0.0771114	0.0625772	-0.638103	0.00680206	0.15755	0.0223225	-0.711754	0.553341
(p.Glu.79.His)	E	79	H	var	3	-0.25637	0.73468	0.149771	0.356177	0.145098	0.257188	-0.900729	0.284494	-0.170252	0.234714	-0.0925589	0.101566	-0.44108	0.0569929	-0.0695057	0.184098	-1.38633	1.42874
(p.Glu.79.Ile)	E	79	I	var	3	-1.26548	0.11682	0.173995	0.109872	0.0842828	0.114686	-2.69851	0.796865	0.304433	0.0587695	0.209684	0.269968	-1.84303	0.20183	0.272847	0.139832	-2.24526	0.96429
(p.Glu.79.Lys)	E	79	K	var	3	-0.477102	0.501979	0.390196	0.302619	0.112578	0.0549065	-1.11311	0.246088	0.305806	0.0650151	0.127068	0.322097	-0.869465	0.13354	0.26556	0.112713	-1.09656	0.738859
(p.Glu.79.Leu)	E	79	L	var	3	-3.05512	0.541504	0.291061	0.230846	0.238248	0.152807	-4.46377	0.484169	0.12228	0.207616	0.130644	0.0320987	-3.32246	0.399865	0.0786805	0.0216409	-4.13811	1.35393
(p.Glu.79.Met)	E	79	M	var	3	-0.683044	0.382004	0.227974	0.0927244	0.103943	0.119112	-1.83674	0.39816	0.0190701	0.134556	-0.060064	0.0116452	-1.3938	0.438862	-0.249189	0.0330727	-1.60096	0.635418
(p.Glu.79.Asn)	E	79	N	var	3	-0.408285	0.0914372	0.246039	0.0031178	0.305192	0.135048	-1.27515	0.341284	0.256676	0.0214561	0.0217581	0.0131981	-0.87371	0.0358955	0.234782	0.113856	-0.833444	0.512382
(p.Glu.79.Pro)	E	79	P	var	3	-5.22967	1.28574	-1.54084	0.515253	-0.331712	1.07087	-7.49435	0.159624	-2.00624	0.0827177	-0.60212	0.723696	-4.09525	0.234725	-1.65858	0.120857	-4.53645	1.75173
(p.Glu.79.Gln)	E	79	Q	var	3	0.239973	0.20611	0.215152	0.115962	0.115328	0.155424	0.190573	0.143119	0.162077	0.0726264	-0.0193377	0.0642945	0.113621	0.0689878	0.0832463	0.0427105	-0.221596	0.493874
(p.Glu.79.Arg)	E	79	R	var	3	-1.12766	0.489739	0.187887	0.167263	0.162653	0.161307	-1.90997	0.520209	0.167711	0.0464443	0.00654275	0.00110415	-1.34917	0.0396869	0.102382	0.0114428	-1.77381	1.24246
(p.Glu.79.Ser)	E	79	S	var	3	-0.126431	0.235733	0.213099	0.133704	0.154358	0.281576	-0.524055	0.193267	0.12716	0.0741667	0.039674	0.0192126	-0.487618	0.0602542	-0.00391218	0.00608877	-0.588812	0.531911
(p.Glu.79.Thr)	E	79	T	var	3	-0.15307	0.174354	0.189951	0.0218194	0.137983	0.0908346	-0.421402	0.262033	0.112018	0.0327514	0.0666351	0.0087175	-0.337601	0.121888	0.165619	0.100871	-0.5277	0.550895
(p.Glu.79.Val)	E	79	V	var	3	-0.275491	0.455014	0.261709	0.179363	0.0973972	0.00862682	-0.959017	0.365942	0.210251	0.101633	0.0615255	0.00493054	-0.551225	0.0510386	0.159713	0.0982766	-0.992814	0.85995
(p.Glu.79.Trp)	E	79	W	var	3	-3.11666	0.50026	0.159157	0.242391	0.167626	0.303564	-4.2749	0.255015	0.0949915	0.0206352	-0.0426734	0.112424	-3.50101	0.306883	0.0564507	0.0597316	-3.98613	1.28223
(p.Glu.79.Tyr)	E	79	Y	var	3	-1.96627	0.452508	0.262052	0.0499174	0.111659	0.214067	-3.25506	0.540667	0.186282	0.145719	-0.144771	0.201301	-2.52228	0.00323812	-0.0336549	0.151975	-2.59414	1.85718
(p.Leu.80.Ter)	L	80	*	var	3	-7.0589	0.122941	-4.29292	0.254254	-1.08403	1.46695	-7.70973	0.00274736	-4.52605	0.101849	-1.00893	0.720019	-5.04936	0.0927983	-3.53904	0.122591	-5.2779	0.536826
(p.Leu.80.Ala)	L	80	A	var	3	-0.976959	0.377365	0.184338	0.124237	0.191147	0.0483309	-3.86542	0.535342	0.128809	0.020053	0.0343116	0.0148269	-2.14427	0.614855	0.232341	0.0299281	-2.74417	2.12494
(p.Leu.80.Cys)	L	80	C	var	3	-4.89894	0.736503	-0.325241	0.322529	-0.0128257	0.0124859	-5.50534	0.644042	-0.597296	0.494674	0.190211	0.00146056	-3.87254	0.0253699	-0.433217	0.232736	-3.69143	0.329984
(p.Leu.80.Asp)	L	80	D	var	3	-10.4483	0.682217	-6.32396	0.0222941	-1.10303	1.65841	-9.42161	0.306319	-6.2655	0.0482793	-1.03918	0.730208	-5.37478	0.702598	-4.1549	0.0681848	-6.08936	0.364869
(p.Leu.80.Glu)	L	80	E	var	3	-6.37121	1.0847	-3.57914	0.0758176	-0.445612	1.03974	-8.23953	0.583833	-4.19472	0.278767	-0.735358	0.670292	-4.7149	0.0956684	-3.42908	0.175051	-5.66681	1.11846
(p.Leu.80.Phe)	L	80	F	var	3	-6.34491	0.849417	-2.51665	0.744283	-0.10429	0.486734	-6.70913	0.161194	-4.68122	0.314915	0.0339742	0.20415	-4.46957	0.535051	-3.58753	0.0367486	-5.36116	0.667895
(p.Leu.80.Gly)	L	80	G	var	3	-5.20153	0.619967	-0.730207	0.399669	0.096664	0.128541	-6.54079	0.489331	-3.56655	0.102177	-0.0011511	0.0305871	-4.19691	0.210234	-2.78915	0.430471	-5.04293	1.05084
(p.Leu.80.His)	L	80	H	var	3	-5.73141	0.80822	-3.73449	0.28389	-0.558977	1.16943	-7.12476	0.0246906	-3.84214	0.0266349	-0.701588	0.57891	-4.06814	0.278993	-3.3433	0.0287119	-4.44476	0.347133
(p.Leu.80.Ile)	L	80	I	var	3	0.122425	0.0665597	0.225678	0.0883791	0.161766	0.0131857	-0.138295	0.271572	0.224167	0.105473	0.0693337	0.159727	0.203895	0.170954	0.140753	0.216577	0.0326768	0.583565
(p.Leu.80.Lys)	L	80	K	var	3	-9.48082	0.577412	-6.39169	0.637338	-0.810331	1.58705	-8.26091	0.0884167	-6.04203	0.978993	-0.962583	0.822676	-4.99618	0.301506	-3.94203	0.00140173	-5.47697	0.607243
(p.80.=)	L	80	L	syn	3	-0.132559	0.0628703	0.145771	0.00518739	0.0453901	0.0297503	-0.396812	0.0739434	0.0503101	0.0172109	-0.0177004	0.0671647	-0.282243	0.0577801	0.0462269	0.0901365	-0.372212	0.293249
(p.Leu.80.Met)	L	80	M	var	3	-1.03939	0.284564	0.113442	0.195527	0.11109	0.131693	-2.49416	0.409537	-0.0174838	0.136956	-0.0205254	0.00351201	-1.05796	0.354875	-0.00141864	0.0127257	-1.9953	1.21675
(p.Leu.80.Asn)	L	80	N	var	3	-5.20112	0.92983	-3.91171	0.363855	-0.090183	0.518103	-7.4471	1.09697	-4.90218	0.336613	0.121464	0.0367017	-4.44599	0.493034	-3.48688	0.0445949	-4.55753	1.25243
(p.Leu.80.Pro)	L	80	P	var	3	-5.34633	1.29222	-3.55771	0.183548	-0.769567	1.15581	-6.91589	0.0907292	-3.81808	0.144013	-0.587673	0.373899	-4.13916	0.235029	-2.74212	0.360404	-4.43931	0.622452
(p.Leu.80.Gln)	L	80	Q	var	3	-10.3884	0.513136	-4.65379	0.158933	-0.261041	0.673351	-10.251	0.440617	-5.07866	0.4273	-0.404664	0.225481	-5.14642	0.418432	-3.77399	0.140708	-6.04617	0.160656
(p.Leu.80.Arg)	L	80	R	var	3	-4.79652	0.43623	-3.37532	0.195241	-0.836371	1.28337	-6.32275	0.516134	-3.41417	0.00828772	-0.932128	0.654354	-3.99521	0.0274915	-3.08194	0.0669509	-4.55371	0.708274
(p.Leu.80.Ser)	L	80	S	var	3	-5.08096	0.472103	-0.170982	0.214708	0.0663507	0.0688996	-5.79977	0.173486	-2.39433	0.608837	0.0558732	0.118275	-4.1005	0.399848	-1.33698	0.65389	-4.73278	0.473194
(p.Leu.80.Thr)	L	80	T	var	3	-2.79589	0.205384	0.22531	0.0844255	0.0878873	0.0179865	-3.90109	0.0886479	-0.0751253	0.161966	-0.0235483	0.00887553	-2.73471	0.155103	-0.0435825	0.0573479	-3.50162	1.18437
(p.Leu.80.Val)	L	80	V	var	3	0.140719	0.0981249	0.187457	0.032502	0.142768	0.0648056	-0.322	0.291061	0.0913915	0.00663466	0.00453957	0.0381916	0.00576652	0.00469325	0.0938179	0.018404	-0.128818	0.328923
(p.Leu.80.Trp)	L	80	W	var	3	-5.79908	0.281677	-3.6551	0.67162	-0.345538	0.719091	-7.23818	0.688014	-4.77569	0.296714	-0.639789	0.730061	-4.56838	0.530474	-3.78278	0.216956	-5.10323	0.479857
(p.Leu.80.Tyr)	L	80	Y	var	3	-5.32214	0.471847	-2.20046	0.194722	0.0651729	0.189308	-7.03738	0.731682	-4.23295	0.0100747	-0.136605	0.300887	-4.39326	0.586293	-3.48937	0.304752	-5.33529	1.68958
(p.Leu.81.Ter)	L	81	*	var	3	-9.07917	0.171573	-3.98947	0.489153	-0.611915	1.21904	-9.52114	0.290718	-5.55955	0.419944	-0.636317	0.445705	-5.03993	0.714348	-3.78906	0.11907	-5.70813	0.420423
(p.Leu.81.Ala)	L	81	A	var	3	-4.04485	0.609186	0.218047	0.128322	0.197103	0.117064	-5.14691	0.081038	0.134095	0.109653	0.0158599	0.0366356	-4.10114	0.276024	0.115888	0.0805967	-4.30858	1.67917
(p.Leu.81.Cys)	L	81	C	var	3	-5.10275	0.775011	0.18362	0.301582	0.180596	0.178002	-5.57125	0.0308918	0.225905	0.0513137	0.0148829	0.133537	-4.61553	0.337777	0.175528	0.055096	-4.69375	1.5987
(p.Leu.81.Asp)	L	81	D	var	3	-8.98437	1.71821	-0.729429	0.359049	0.0985673	0.120334	-8.29901	0.550977	-3.11872	0.156718	0.127846	0.00747323	-4.7999	0.185314	-2.15692	0.74925	-5.14192	0.414528
(p.Leu.81.Glu)	L	81	E	var	3	-5.00093	0.849596	-0.920576	0.43113	0.0223005	0.0438173	-5.70872	0.421966	-2.85065	0.0266377	-0.0102268	0.161869	-4.08849	0.277841	-2.29874	0.333511	-4.25535	0.18272
(p.Leu.81.Phe)	L	81	F	var	3	-1.18945	0.29582	0.0896757	0.0750201	0.0175987	0.0582866	-2.88883	0.764066	0.000129962	0.0626601	-0.0346823	0.0222837	-1.59139	0.143344	0.0984503	0.0455828	-2.41808	1.82867
(p.Leu.81.Gly)	L	81	G	var	3	-6.5826	0.944988	-3.5977	0.182459	-0.0208292	0.435836	-7.84354	0.303525	-3.97143	0.0410345	-0.0700094	0.0835437	-4.54153	0.327687	-3.26112	0.0195925	-5.1222	0.885018
(p.Leu.81.His)	L	81	H	var	3	-5.29122	0.550217	0.239175	0.306549	0.298697	0.0366482	-6.92374	0.381666	-2.52962	0.883217	-0.0686803	0.122095	-4.45563	0.199825	-1.76583	1.17317	-4.58858	0.249895
(p.Leu.81.Ile)	L	81	I	var	3	-0.156121	0.117082	0.161691	0.00582631	0.156358	0.040073	-0.0309729	0.205181	0.106378	0.277868	0.037112	0.280936	-0.0010018	0.111803	0.0746171	0.0806394	-0.078325	0.398431
(p.Leu.81.Lys)	L	81	K	var	3	-10.5647	0.627935	-6.32182	0.583073	-0.162182	0.679924	-9.69435	1.4553	-6.60699	1.29449	-0.209109	0.195017	-5.61459	1.14788	-4.34556	0.422612	-5.86796	0.537763
(p.81.=)	L	81	L	syn	3	0.210387	0.143902	0.165885	0.0919381	0.129924	0.13582	0.315145	0.0850458	0.18617	0.0528401	0.0999966	0.12643	0.294884	0.190073	0.184014	0.093913	0.250325	0.0213916
(p.Leu.81.Met)	L	81	M	var	3	-0.236061	0.102606	0.183515	0.056925	0.193163	0.210648	-0.579939	0.00764409	0.272634	0.0190837	0.0668335	0.161304	-0.645552	0.228154	0.0744247	0.0229687	-0.385146	0.295056
(p.Leu.81.Asn)	L	81	N	var	3	-4.06294	0.336119	0.0695319	0.30285	-0.0137982	0.203324	-4.74796	0.213037	-0.123267	0.1397	0.0347422	0.185523	-3.22449	0.189031	0.0422646	0.331649	-3.85436	0.854825
(p.Leu.81.Pro)	L	81	P	var	3	-4.06784	0.203056	-1.9575	0.0105639	-0.563151	0.956721	-4.20278	0.26606	-2.20072	0.242863	-0.619589	0.41847	-3.5417	0.0665187	-1.99225	0.0505803	-3.72409	0.444143
(p.Leu.81.Gln)	L	81	Q	var	3	-8.43192	1.61066	0.133757	0.236865	0.135068	0.245494	-7.90932	0.577652	-1.49178	1.43395	0.0727482	0.0136431	-5.18892	0.480169	-0.57262	0.534447	-5.38057	1.11455
(p.Leu.81.Arg)	L	81	R	var	3	-5.49058	0.0136307	-2.72324	0.250847	0.0723514	0.231838	-6.44112	0.116085	-3.52829	0.182542	0.000112545	0.0421471	-4.25783	0.305712	-3.07185	0.0899005	-4.90185	0.658556
(p.Leu.81.Ser)	L	81	S	var	3	-5.07796	0.917339	0.231643	0.152631	0.125545	0.186021	-5.79232	0.214156	-0.339691	0.509215	-0.0482764	0.184766	-4.44755	0.590189	-0.200052	0.112025	-4.97813	1.39376
(p.Leu.81.Thr)	L	81	T	var	3	-0.7614	0.37983	0.177848	0.18944	0.0744791	0.231761	-1.87056	0.330912	0.0609025	0.0864568	-0.0375396	0.116973	-1.40659	0.0885787	0.0748909	0.168709	-1.84412	1.19391
(p.Leu.81.Val)	L	81	V	var	3	-0.479536	0.277098	0.201967	0.118531	0.248249	0.145964	-0.930465	0.160565	0.1703	0.0964091	0.0228327	0.0822785	-0.790448	0.108577	0.123872	0.0867738	-0.730552	0.609273
(p.Leu.81.Trp)	L	81	W	var	3	-2.13616	0.252062	0.258465	0.0860899	0.165303	0.0188272	-4.50702	0.365203	0.0556816	0.0682818	-0.152598	0.0345049	-3.62518	0.339947	0.0795643	0.0932755	-4.23817	2.44793
(p.Leu.81.Tyr)	L	81	Y	var	3	-2.29747	0.636157	0.100666	0.284858	-0.0502034	0.195955	-3.20843	0.11779	0.103246	0.0802511	-0.083085	0.126797	-2.54416	0.780313	0.160903	0.00632488	-2.37911	1.97425
(p.Leu.82.Ter)	L	82	*	var	3	-6.74074	0.421402	-4.37038	0.257127	-1.16396	1.52957	-6.6813	0.319191	-4.68469	0.219976	-1.01799	0.742352	-4.6403	0.486678	-3.50006	0.00294276	-5.01359	0.211897
(p.Leu.82.Ala)	L	82	A	var	3	-3.19603	1.21418	0.275806	0.121338	0.227927	0.0109729	-5.18045	0.450201	0.0599244	0.151916	-0.0127438	0.0522553	-4.13052	0.463208	0.13646	0.0647098	-4.44344	1.38203
(p.Leu.82.Cys)	L	82	C	var	3	-7.25739	0.424033	-1.82426	0.513695	0.10039	0.0891748	-6.30765	0.537037	-3.13426	1.11148	0.0711319	0.136833	-4.87785	0.446697	-2.25068	0.829886	-4.96785	0.742268
(p.Leu.82.Asp)	L	82	D	var	3	-5.86728	0.494389	-3.308	0.642425	0.178522	0.273776	-7.12879	0.030509	-3.99445	0.0650564	0.163751	0.0199509	-4.13957	0.162089	-3.2493	0.310387	-4.84451	1.13569
(p.Leu.82.Glu)	L	82	E	var	3	-7.90984	0.378614	-0.089249	0.253578	0.166044	0.189869	-9.74071	2.26631	-2.38211	1.03492	0.0656363	0.17125	-4.85934	0.427427	-1.38558	0.653573	-5.67192	1.07059
(p.Leu.82.Phe)	L	82	F	var	3	-4.5916	0.249427	-2.64921	0.0941725	-0.0638232	0.465922	-5.87862	0.469199	-3.06475	0.383991	-0.0799065	0.0932737	-4.02114	0.204694	-2.70291	0.459644	-4.20831	0.498987
(p.Leu.82.Gly)	L	82	G	var	3	-6.23325	0.579639	-3.86927	0.328584	-0.129341	0.588686	-7.54022	0.314454	-4.11347	0.0979693	0.044415	0.0877875	-4.56892	0.544965	-3.4733	0.0297069	-5.12662	0.885726
(p.Leu.82.His)	L	82	H	var	3	-9.47096	0.626146	-6.95783	0.785997	-0.878947	1.59203	-9.42713	0.191502	-6.36922	0.382939	-0.962464	1.01433	-5.4536	0.0747002	-4.24262	0.522038	-5.88591	0.476113
(p.Leu.82.Ile)	L	82	I	var	3	-0.305161	0.16752	0.342505	0.0185167	0.200091	0.0335066	-0.673371	0.313517	0.20204	0.219903	0.0319721	0.0113884	-0.501507	0.170868	0.252411	0.0668425	-0.469046	0.678023
(p.Leu.82.Lys)	L	82	K	var	3	-7.13616	0.912239	-4.61059	0.15768	-0.737175	1.22466	-8.91734	0.788448	-4.84639	0.478208	-0.794272	1.00353	-4.72861	0.0288152	-3.33092	0.0128423	-5.25284	1.04988
(p.82.=)	L	82	L	syn	3	0.174852	0.120591	0.162699	0.0779644	0.0510126	0.0340672	0.0674434	0.0576722	0.0721673	0.0368931	0.0123207	0.0549959	-0.0272769	0.0809271	0.184302	0.0861046	0.165602	0.0747081
(p.Leu.82.Met)	L	82	M	var	3	0.0425946	0.230194	0.100706	0.110129	0.0343716	0.0343456	-0.337311	0.132702	0.253848	0.0652237	0.113391	0.0531089	-0.18282	0.257571	0.276091	0.0944677	-0.635151	0.613831
(p.Leu.82.Asn)	L	82	N	var	3	-9.19232	2.13943	-3.71579	0.750013	0.0120558	0.0409437	-9.68618	1.0302	-4.7956	0.49156	0.0964626	0.228616	-5.12384	0.741314	-3.76073	0.0960853	-5.49723	0.1356
(p.Leu.82.Pro)	L	82	P	var	3	-7.02248	0.281558	-4.68358	0.264172	-0.971349	1.33544	-8.94268	0.673247	-5.07578	0.881967	-1.01258	0.658273	-5.08163	0.59183	-4.03908	0.270147	-5.79465	1.18775
(p.Leu.82.Gln)	L	82	Q	var	3	-6.91372	0.628758	0.054762	0.275247	0.0681532	0.117683	-7.26606	0.17115	-1.94784	1.36803	-0.0131706	0.154316	-4.84278	1.08466	-0.821727	0.517252	-5.5712	0.79523
(p.Leu.82.Arg)	L	82	R	var	3	-6.94786	0.733348	-4.18102	0.586056	-0.934206	1.51655	-7.12201	0.304788	-4.6749	0.0985342	-0.877013	0.752875	-4.64973	0.391897	-3.71214	0.210129	-5.02582	0.755177
(p.Leu.82.Ser)	L	82	S	var	3	-5.34856	0.276283	-1.7825	0.627594	0.0702051	0.0224946	-6.48445	0.0905037	-3.90342	0.259493	0.0674204	0.00777471	-4.37142	0.437037	-3.06177	0.0307181	-5.23105	0.505293
(p.Leu.82.Thr)	L	82	T	var	3	-6.21039	1.43457	0.407249	0.00915073	0.179672	0.0956885	-7.21767	0.383956	-1.28136	1.23261	-0.0162792	0.158042	-4.51758	0.217538	-0.41096	0.201101	-5.34684	0.612462
(p.Leu.82.Val)	L	82	V	var	3	-0.318507	0.279611	0.172201	0.138277	0.10251	0.0438158	-1.22569	0.578065	0.166864	0.0384545	0.0233271	0.0550033	-0.485495	0.000500093	0.148105	0.0301894	-0.960153	0.916811
(p.Leu.82.Trp)	L	82	W	var	3	-4.81335	0.287359	-3.79049	0.258301	-0.462093	1.17137	-5.21472	0.121233	-4.40996	0.32265	-0.732698	0.818472	-4.20656	0.0925908	-3.4363	0.112908	-4.56176	0.496185
(p.Leu.82.Tyr)	L	82	Y	var	3	-6.38666	0.374181	-4.45849	0.36743	-0.980276	1.40469	-8.29339	0.21733	-4.51678	0.382939	-1.27359	0.910828	-5.36359	0.688417	-3.60269	0.221502	-5.68143	0.209485
(p.Ile.83.Ter)	I	83	*	var	3	-10.8411	0.574837	-3.98703	0.629858	-0.989025	1.39453	-10.2987	0.928429	-5.1264	0.0605123	-0.859569	0.394577	-5.24841	0.579363	-3.66335	0.383189	-5.50895	1.08706
(p.Ile.83.Ala)	I	83	A	var	3	-5.59107	1.10524	0.239156	0.189237	0.163722	0.204519	-5.73925	0.407953	0.0697881	0.0624325	0.0612307	0.163821	-4.59993	0.670564	0.0338178	0.0162267	-5.09225	1.49787
(p.Ile.83.Cys)	I	83	C	var	3	-5.46293	1.11047	-3.65328	0.610675	0.0976287	0.329827	-5.92221	0.140136	-3.50307	0.254082	-0.149849	0.0980425	-4.61351	0.319805	-3.21084	0.195269	-5.21393	1.41347
(p.Ile.83.Asp)	I	83	D	var	3	-10.3197	0.576195	-7.80659	0.678167	-1.3827	1.69734	-10.3003	0.296275	-6.02369	0.132183	-1.07448	0.81377	-5.22278	0.735971	-4.2608	0.528242	-5.5955	0.511987
(p.Ile.83.Glu)	I	83	E	var	3	-7.88376	0.0221424	-4.77933	0.608787	-0.861802	1.4393	-10.5706	1.00874	-6.27753	0.17071	-1.06732	0.708654	-4.87902	0.402505	-4.04043	0.286981	-5.82186	0.146812
(p.Ile.83.Phe)	I	83	F	var	3	-0.165513	0.171023	-0.171712	0.253228	0.246038	0.654911	0.179271	0.0751511	0.217541	0.0527166	-0.0393278	0.481561	0.147245	0.400754	0.189217	0.0806235	0.081662	0.0505499
(p.Ile.83.Gly)	I	83	G	var	3	-5.99234	0.546848	-4.01634	0.103766	-0.0254481	0.553294	-7.20142	0.378406	-4.1211	0.0291318	0.0592495	0.0319753	-4.53298	0.492992	-3.53718	0.096279	-5.26124	0.903216
(p.Ile.83.His)	I	83	H	var	3	-9.43322	0.744857	-6.25913	0.425238	-0.158906	1.12778	-9.4396	0.142236	-7.17417	0.688532	-0.382598	0.714004	-5.24802	0.333802	-4.36215	0.0353796	-6.20409	0.502454
(p.83.=)	I	83	I	syn	3	-0.0977855	0.482895	-0.146087	0.370496	-0.244436	0.339547	-0.274163	0.0348456	-0.301517	0.116284	-0.0856056	0.131884	-0.0866346	0.0298231	-0.223333	0.196863	-0.627061	0.0277621
(p.Ile.83.Lys)	I	83	K	var	3	-6.61431	0.396869	-3.39129	0.628537	-1.04046	1.27874	-8.58004	1.01749	-4.2002	0.51589	-0.947461	0.808554	-5.23035	0.427864	-3.11086	0.0250623	-5.4073	0.543226
(p.Ile.83.Leu)	I	83	L	var	3	0.312439	0.0166111	0.194424	0.133612	0.0905338	0.0552044	-0.584349	0.921478	0.14856	0.0172024	-0.0387609	0.167084	0.344179	0.0634582	0.149042	0.0155936	-0.273107	0.513547
(p.Ile.83.Met)	I	83	M	var	3	-1.56089	0.634922	0.0123883	0.180835	0.224069	0.32162	-2.76826	0.118604	0.0504092	0.429841	0.295874	0.292667	-1.99026	0.00867044	-0.00859717	0.320412	-2.64214	0.509653
(p.Ile.83.Asn)	I	83	N	var	3	-5.89123	0.925424	-4.91329	0.00869415	-0.341665	1.05942	-5.40134	1.62749	-4.62794	0.791457	-0.56114	0.606889	-4.28172	0.266309	-3.62996	0.584119	-4.76156	0.281079
(p.Ile.83.Pro)	I	83	P	var	3	-9.05433	1.25125	-4.19098	0.328863	-0.813873	1.2143	-8.8268	1.11245	-4.66742	0.0291316	-0.858043	0.602077	-5.13808	0.415344	-3.28635	0.246163	-5.35674	0.527904
(p.Ile.83.Gln)	I	83	Q	var	3	-9.58972	0.713209	-7.36907	0.127523	-0.816106	1.34896	-9.00111	0.24824	-6.57472	0.525694	-1.10926	0.488955	-5.14006	0.125617	-4.40937	0.703796	-5.60464	0.0783405
(p.Ile.83.Arg)	I	83	R	var	3	-7.31185	0.516228	-5.28787	0.21223	-0.950729	1.65858	-8.89987	1.58574	-6.0302	0.0159198	-0.958186	0.653928	-4.96142	0.360187	-4.05098	0.257771	-5.66249	0.624415
(p.Ile.83.Ser)	I	83	S	var	3	-5.44031	0.322894	-4.49516	0.0802021	0.0447984	0.510759	-5.91795	0.303616	-4.35459	0.129471	0.0452395	0.100762	-4.39593	0.135222	-3.4342	0.155458	-4.70924	0.482569
(p.Ile.83.Thr)	I	83	T	var	3	-5.8873	0.230612	-0.0650887	0.0127153	0.0800949	0.0645347	-6.0616	0.691756	-3.19327	0.304853	0.155512	0.010794	-4.24228	0.0475963	-1.75737	0.77804	-4.64907	0.0341694
(p.Ile.83.Val)	I	83	V	var	3	-0.0721121	0.243604	0.208278	0.113942	0.228779	0.0976336	-0.237411	0.0565755	0.209811	0.0699503	0.0497828	0.017981	-0.235461	0.125583	0.175673	0.0526819	-0.477407	0.407313
(p.Ile.83.Trp)	I	83	W	var	3	-7.1679	0.0501484	-4.54548	0.118459	-0.75072	1.51711	-8.91452	0.12578	-5.10536	0.362207	-1.00455	0.774087	-4.80371	0.652951	-3.89356	0.329562	-5.65536	0.80392
(p.Ile.83.Tyr)	I	83	Y	var	3	-8.45862	0.506286	-1.93061	0.10022	0.153492	0.298977	-8.54613	0.306094	-6.7807	1.5595	-0.21854	0.0298749	-4.94237	0.316093	-3.94038	0.0125834	-6.1031	0.872382
(p.Asp.84.Ter)	D	84	*	var	3	-11.0587	0.573354	-6.55311	0.215051	-1.12467	1.67229	-10.592	0.445251	-6.51188	0.60344	-1.12529	0.66338	-5.13528	0.474775	-4.02315	0.164397	-5.83428	0.591753
(p.Asp.84.Ala)	D	84	A	var	3	-7.77223	0.191217	-5.55398	0.110813	-0.741562	1.34956	-8.29732	0.730385	-5.99547	0.340248	-1.03521	0.766013	-5.02614	0.537988	-4.21289	0.00718252	-5.69355	0.392929
(p.Asp.84.Cys)	D	84	C	var	3	-10.2871	0.505765	-9.56641	0.37214	-0.907296	1.54347	-9.6634	0.452158	-6.09061	0.291348	-1.64606	0.78088	-4.67838	0.546052	-3.79346	0.638778	-5.16611	0.0626275
(p.84.=)	D	84	D	syn	3	-0.127255	0.0929308	-0.0171358	0.0264146	-0.03319	0.0840585	0.035898	0.0160338	0.206835	0.212715	-0.0693283	0.0736182	0.077568	0.187271	0.122574	0.107043	0.167478	0.137199
(p.Asp.84.Glu)	D	84	E	var	3	-5.35337	0.484373	0.287746	0.194202	0.160723	0.15223	-5.41415	0.0130296	-0.0429947	0.273338	0.00222593	0.0288043	-4.55564	0.383301	0.017678	0.19486	-4.69503	0.813915
(p.Asp.84.Phe)	D	84	F	var	3	-9.67591	0.623027	-6.7943	0.261764	-1.04493	1.58124	-9.50024	0.0881086	-7.57385	1.56915	-1.22747	1.1035	-5.00768	0.0591476	-4.32827	0.257067	-5.99948	0.181451
(p.Asp.84.Gly)	D	84	G	var	3	-6.92181	0.479523	-5.32128	0.414578	-0.355114	0.990293	-7.4871	0.25854	-5.33227	0.067086	-0.582142	0.591765	-4.86657	0.401623	-4.0111	0.178294	-5.4841	0.387338
(p.Asp.84.His)	D	84	H	var	3	-4.44638	0.908119	-3.31069	0.47641	-0.729042	1.50391	-4.29623	0.192196	-3.00457	0.510261	-1.20901	0.331701	-3.48067	0.781286	-2.9042	0.601108	-4.29342	0.92565
(p.Asp.84.Ile)	D	84	I	var	3	-9.26629	0.83557	-7.54564	0.712269	-1.04232	1.89645	-8.6404	1.00004	-6.58249	0.425596	-1.01006	0.991554	-5.82591	0.852781	-4.18018	0.0202824	-5.43212	0.270105
(p.Asp.84.Lys)	D	84	K	var	3	-9.25982	0.660903	-8.53917	0.527278	-1.32822	2.14999	-9.31633	0.103968	-6.96594	0.0568426	-0.864948	0.928038	-5.6998	0.718974	-4.58662	0.390021	-6.34385	1.36798
(p.Asp.84.Leu)	D	84	L	var	3	-11.3389	0.593213	-7.79634	1.16669	-1.07899	1.53942	-11.1093	0.290822	-6.94022	0.700898	-1.19974	0.943881	-5.20987	0.850673	-4.03367	0.286066	-5.76262	0.196612
(p.Asp.84.Met)	D	84	M	var	3	-7.11751	0.497822	-6.45962	2.10822	-1.21901	1.48845	-8.77191	0.184123	-5.42152	0.242018	-1.22613	0.607045	-5.07183	1.37631	-4.21272	1.26922	-5.23069	0.562475
(p.Asp.84.Asn)	D	84	N	var	3	-5.19209	0.270957	0.183865	0.135621	0.0881813	0.0730821	-5.39831	0.00981142	-1.38987	1.0207	0.00291288	0.12551	-3.82391	0.379628	-0.729181	0.531133	-4.05384	0.329582
(p.Asp.84.Pro)	D	84	P	var	3	-9.43413	0.666121	-7.71348	0.881718	-1.24107	1.92719	-9.37227	0.477762	-6.81436	0.610427	-1.24781	0.870019	-5.78151	0.0141045	-4.61675	0.370906	-6.22928	1.23534
(p.Asp.84.Gln)	D	84	Q	var	3	-9.32649	0.593915	-5.90968	0.303035	-0.885892	1.47734	-9.2906	0.243829	-7.02517	0.624089	-1.21356	0.829208	-5.03887	0.520456	-4.40638	0.195282	-6.05509	0.400861
(p.Asp.84.Arg)	D	84	R	var	3	-11.3893	2.25737	-7.48289	0.231836	-1.08872	1.73414	-11.6833	1.38613	-6.63865	0.197646	-1.08444	0.9259	-5.3465	0.588965	-4.34649	0.0724539	-5.73839	0.633778
(p.Asp.84.Ser)	D	84	S	var	3	-10.5617	1.72741	-5.17817	0.0119596	-0.0967668	0.334999	-8.99752	1.26477	-5.08173	0.126834	-0.273879	0.115286	-4.93178	0.430613	-4.33564	0.22676	-5.90872	0.0426611
(p.Asp.84.Thr)	D	84	T	var	3	-9.71996	0.52902	-4.65256	0.145336	-1.19749	1.87319	-9.05005	0.334962	-5.69966	0.0911797	-1.15593	0.760939	-5.23556	0.560009	-3.93998	0.124357	-5.69481	0.106753
(p.Asp.84.Val)	D	84	V	var	3	-7.34584	0.516671	-6.1025	0.276667	-1.08078	1.65046	-7.39757	0.24577	-5.69024	0.130855	-1.2089	0.873338	-5.05942	0.662041	-4.07341	0.137039	-5.52319	0.216442
(p.Asp.84.Trp)	D	84	W	var	3	-9.60748	0.485214	-6.77241	0.501898	-1.00137	1.71264	-10.5625	0.835087	-6.38487	0.0409511	-1.22522	0.954536	-5.11985	0.585731	-4.10905	0.269534	-5.44957	0.479194
(p.Asp.84.Tyr)	D	84	Y	var	3	-5.80261	0.821069	-5.71348	0.660932	-1.09137	1.60495	-6.72439	0.419901	-5.13128	0.287829	-1.34079	1.12655	-5.05188	0.614642	-4.40011	0.296832	-5.07384	0.224789
(p.Thr.85.Ter)	T	85	*	var	3	-9.47459	0.69219	-4.50801	0.451083	-1.1123	1.63007	-9.43556	0.027586	-5.36277	0.840331	-1.03932	0.669607	-5.35803	0.467281	-3.56023	0.154928	-6.33156	1.63036
(p.Thr.85.Ala)	T	85	A	var	3	-3.61495	0.174713	0.271737	0.176208	0.181461	0.121023	-4.13418	0.0421109	0.170653	0.0347172	0.0413321	0.0913364	-2.9467	0.141956	0.183155	0.0650454	-1.4617	0.872031
(p.Thr.85.Cys)	T	85	C	var	3	-7.42147	1.79785	0.306791	0.0423205	0.202193	0.18091	-6.83811	0.486114	-0.0636657	0.23006	0.0826685	0.205818	-4.8921	0.966837	-0.130266	0.285226	-3.94297	1.65423
(p.Thr.85.Asp)	T	85	D	var	3	-9.66985	0.826535	-4.66427	0.640583	-0.581339	1.59767	-9.85123	0.436359	-4.76388	0.275548	-0.986047	0.353599	-5.42143	0.964818	-4.00887	0.269477	-5.55799	0.289986
(p.Thr.85.Glu)	T	85	E	var	3	-8.93443	0.415821	-4.36703	0.734863	-0.747883	1.47031	-8.9084	1.43204	-4.36376	0.254384	-0.966346	0.726475	-5.13471	0.614775	-3.57927	0.167344	-5.32473	0.589765
(p.Thr.85.Phe)	T	85	F	var	3	-8.52817	0.662532	-7.01503	0.59183	-0.214975	0.679282	-8.53462	0.0290021	-5.39175	1.25255	-0.441519	0.761667	-5.26989	0.51847	-3.98661	1.04288	-5.9804	0.164957
(p.Thr.85.Gly)	T	85	G	var	3	-7.68938	0.479052	-1.44066	0.32859	0.189841	0.162563	-7.86476	0.524314	-3.20841	0.188963	0.0821549	0.164054	-4.81476	0.509271	-3.09018	0.0248904	-5.10036	0.966102
(p.Thr.85.His)	T	85	H	var	3	-8.3412	0.566326	-7.62055	0.432701	-0.726217	1.32438	-8.23383	0.496029	-6.30743	1.97707	-0.625852	0.39376	-5.94878	1.46951	-4.17095	0.317934	-5.42232	0.748285
(p.Thr.85.Ile)	T	85	I	var	3	-2.82094	0.0355968	-2.54519	0.0948468	-0.079146	0.218899	-2.83271	0.731204	-2.14455	0.272653	-0.0719513	0.236782	-2.76587	0.380355	-2.28818	0.462029	-2.777	0.415373
(p.Thr.85.Lys)	T	85	K	var	3	-6.01349	0.776668	-3.08815	0.0219758	-0.672431	1.34559	-5.18206	0.0804962	-3.63346	0.551758	-0.976782	0.692999	-4.06348	0.248144	-3.26557	0.412272	-4.70622	0.531107
(p.Thr.85.Leu)	T	85	L	var	3	-7.18713	0.311203	-3.55971	0.538426	0.0126508	0.593648	-8.40429	0.689515	-3.95698	0.0146419	0.0575671	0.0913175	-4.90518	0.616291	-3.50299	0.00451246	-5.60236	0.610418
(p.Thr.85.Met)	T	85	M	var	3	-9.21964	0.798539	-3.60831	0.139422	0.0600598	0.481368	-8.69638	0.445328	-3.34411	0.160994	-0.0249731	0.139854	-4.94465	0.538406	-3.12299	0.00161389	-5.32713	1.06419
(p.Thr.85.Asn)	T	85	N	var	3	-5.66368	1.95238	-4.38727	0.540758	-0.52986	1.2797	-6.92392	2.24887	-4.13629	0.377126	-0.239523	0.377093	-4.71487	1.07357	-3.53688	1.00735	-4.33614	0.348358
(p.Thr.85.Pro)	T	85	P	var	3	-6.64403	0.545001	-3.49102	0.0148909	-0.0136159	0.193939	-6.82163	0.133518	-3.16955	0.553494	0.125077	0.136828	-4.90671	0.89808	-2.78741	0.116732	-5.08124	0.952754
(p.Thr.85.Gln)	T	85	Q	var	3	-8.46019	0.0503923	-3.56962	0.0832328	-0.763836	1.48545	-7.60521	0.30064	-3.73831	0.481259	-0.431821	0.534605	-5.07364	0.434522	-3.47224	0.11402	-5.40623	0.484242
(p.Thr.85.Arg)	T	85	R	var	3	-6.62886	0.29742	-3.98041	0.212897	-1.02137	1.35221	-6.88401	0.342651	-4.46413	0.123905	-0.964073	0.699123	-4.78078	0.593819	-3.4936	0.0879911	-5.01438	0.689073
(p.Thr.85.Ser)	T	85	S	var	3	-6.34661	1.04526	0.265935	0.0768138	0.216417	0.0031937	-5.39189	0.324494	0.239514	0.0316179	0.0672206	0.0224984	-4.41654	0.497472	0.156626	0.0736311	-3.11397	1.2566
(p.85.=)	T	85	T	syn	3	-0.0176592	0.0862279	0.106343	0.250585	0.199951	0.225748	-0.0862487	0.137808	0.159832	0.242629	-0.0199711	0.0524407	-0.103559	0.163528	0.046731	0.110334	-0.0735576	0.336965
(p.Thr.85.Val)	T	85	V	var	3	-7.16938	1.55749	0.342766	0.267766	0.180953	0.198201	-6.60528	0.26926	-0.390018	0.702802	0.05472	0.0350315	-4.54052	0.244713	-0.192681	0.114669	-4.92635	1.65823
(p.Thr.85.Trp)	T	85	W	var	3	-9.93066	0.578014	-4.80312	0.262718	-0.861963	1.47761	-9.4283	0.629574	-5.31265	0.295099	-0.955086	0.816028	-5.52352	0.765067	-3.78086	0.0779105	-5.71311	0.910406
(p.Thr.85.Tyr)	T	85	Y	var	3	-3.94625	0.145697	-2.77215	0.617314	0.0108471	0.509225	-5.92074	0.538199	-3.14635	0.471372	-0.405171	0.246773	-3.68546	0.820175	-3.15403	0.249678	-3.71803	0.54956
(p.Ala.86.Ter)	A	86	*	var	3	-10.9343	0.626162	-5.33867	0.189987	-1.30076	1.87514	-9.67853	1.95898	-5.14352	0.122869	-1.28633	0.952155	-5.20596	0.715869	-3.65214	0.218151	-5.51495	0.32534
(p.86.=)	A	86	A	syn	3	0.161657	0.00770241	0.0976812	0.0167016	0.080017	0.0700314	0.143652	0.0389624	0.0273449	0.00641301	-0.00253035	0.105286	0.00215026	0.118266	-0.0461947	0.0313474	0.0577675	0.0204897
(p.Ala.86.Cys)	A	86	C	var	3	-9.9582	0.601038	-3.72636	0.199764	0.264271	0.322445	-9.93648	0.172575	-4.7853	0.206667	0.149516	0.0749231	-4.86397	0.1451	-4.02621	0.631193	-5.51377	0.521888
(p.Ala.86.Asp)	A	86	D	var	3	-10.2219	0.572271	-5.54782	0.0824678	-0.432401	0.934303	-10.1698	0.183374	-5.86069	0.791516	-0.805027	0.701488	-4.99631	0.444336	-4.24495	0.0198286	-5.40811	0.304061
(p.Ala.86.Glu)	A	86	E	var	3	-8.88724	0.0564458	-4.78715	0.0040775	-0.847706	1.51279	-8.69121	0.194388	-5.02897	0.324141	-1.06504	0.773846	-4.98682	0.253228	-3.87265	0.133281	-5.57603	0.488802
(p.Ala.86.Phe)	A	86	F	var	3	-7.5756	0.629366	-6.85495	0.495741	-1.15883	1.7194	-7.57402	0.192447	-6.80859	0.0316369	-1.24478	0.821863	-6.08146	1.4594	-5.52602	0.32804	-4.92348	0.452243
(p.Ala.86.Gly)	A	86	G	var	3	-3.96526	0.688324	0.145493	0.153339	0.128172	0.133184	-5.43282	0.426987	0.0820668	0.0168447	-0.0316883	0.0794305	-4.61462	0.347204	0.0578528	0.110152	-4.45132	1.79655
(p.Ala.86.His)	A	86	H	var	3	-8.92999	0.468154	-7.04838	1.30732	-0.677226	0.891484	-8.89861	0.142834	-7.13318	1.39624	-0.745397	0.442771	-5.89117	0.418053	-4.32841	0.538373	-6.0871	0.312733
(p.Ala.86.Ile)	A	86	I	var	3	-8.34075	0.646985	-7.6201	0.51336	-0.729716	0.841038	-8.03805	0.388503	-7.27262	0.227692	-0.974758	1.02397	-4.58407	0.459122	-4.5366	0.881271	-5.09503	0.157444
(p.Ala.86.Lys)	A	86	K	var	3	-10.8518	0.607032	-6.3852	0.126218	-0.817512	1.66797	-10.2546	0.842123	-7.15292	1.79533	-1.12834	0.988617	-5.19735	0.666128	-4.1445	0.169093	-5.7767	0.450396
(p.Ala.86.Leu)	A	86	L	var	3	-5.34739	0.432285	-3.07279	0.365867	-0.505735	1.03259	-6.33369	0.472457	-3.10964	0.417157	-0.40109	0.458653	-3.88412	0.677786	-2.77235	0.127794	-4.31466	0.224046
(p.Ala.86.Met)	A	86	M	var	3	-9.44816	0.643247	-6.48158	0.617104	-0.187478	0.710943	-10.4638	0.196347	-5.84819	0.247358	-0.397051	0.304238	-5.22534	0.86368	-4.11463	0.279342	-5.65233	0.67598
(p.Ala.86.Asn)	A	86	N	var	3	-4.82754	0.837467	-2.4022	0.162527	-0.633281	0.878328	-5.07598	0.0749753	-2.41334	0.313204	-0.387477	0.183137	-3.8289	1.00811	-2.2448	0.360911	-3.66204	0.137131
(p.Ala.86.Pro)	A	86	P	var	3	-6.28407	1.61736	0.217875	0.151428	-0.0194448	0.149371	-5.53126	0.59957	0.158497	0.101562	-0.123066	0.264715	-4.85208	0.443777	0.0895894	0.061937	-3.6325	1.81036
(p.Ala.86.Gln)	A	86	Q	var	3	-8.83032	2.33511	0.146101	0.043984	0.189829	0.0238642	-8.61307	0.983297	-1.7455	1.50064	0.0720357	0.359021	-4.71361	0.343899	-3.9776	0.244297	-5.35536	0.279736
(p.Ala.86.Arg)	A	86	R	var	3	-8.08422	0.526292	-5.27894	0.147772	-0.694322	1.17153	-8.23399	0.189509	-5.2891	0.0649793	-0.859235	0.698513	-5.12318	0.96824	-3.84919	0.103262	-5.64172	0.550301
(p.Ala.86.Ser)	A	86	S	var	3	-2.58506	0.0112131	0.2615	0.0940872	0.0779541	0.0591915	-4.48099	0.168955	0.110026	0.0503859	-0.106779	0.12999	-3.17288	0.139119	0.0991457	0.134866	-3.2951	2.22927
(p.Ala.86.Thr)	A	86	T	var	3	-5.0903	0.317293	-4.26664	0.0965774	-0.321056	0.283922	-5.48528	0.100482	-3.88003	0.0741363	0.0773869	0.0496144	-4.05288	0.229129	-3.43537	0.0564336	-4.31318	0.441251
(p.Ala.86.Val)	A	86	V	var	3	-5.44116	0.0589159	-4.38652	0.0660369	-0.383595	0.978202	-5.67871	0.27613	-4.28203	0.174309	-0.305513	0.290296	-4.46788	0.310921	-3.65103	0.239657	-4.70172	0.262618
(p.Ala.86.Trp)	A	86	W	var	3	-6.70769	0.0449631	-7.24757	0.0903048	-1.12421	1.82512	-8.01205	0.159939	-6.45877	0.659773	-1.42903	0.921893	-4.89942	0.372473	-4.31457	0.17725	-5.34861	0.365996
(p.Ala.86.Tyr)	A	86	Y	var	3	-6.01676	0.42911	-6.38107	1.00259	-1.28128	0.927645	-6.93023	0.311312	-5.37232	0.648615	-0.834276	0.605903	-5.06918	0.062545	-4.01374	0.645806	-5.34245	1.6945
(p.Trp.87.Ter)	W	87	*	var	3	-6.18619	0.225609	-5.56432	0.270505	-0.81725	1.2903	-6.46221	0.045889	-5.19544	0.044562	-0.655475	0.466234	-4.46174	0.21424	-3.80091	0.307962	-5.01912	0.603791
(p.Trp.87.Ala)	W	87	A	var	3	-10.2451	0.961409	-4.75273	0.208675	0.159115	0.174367	-8.69728	0.359862	-3.86104	0.184751	0.0648452	0.0636547	-4.89892	0.47573	-3.45647	0.151663	-3.13401	1.84199
(p.Trp.87.Cys)	W	87	C	var	3	-7.15347	0.512861	-5.0696	0.159147	-0.251185	0.59682	-6.76116	0.271396	-4.91077	0.722779	0.100382	0.109419	-4.55254	0.586607	-3.88464	0.127994	-5.18512	0.834382
(p.Trp.87.Asp)	W	87	D	var	3	-10.7836	0.565544	-4.89748	0.475859	-0.383211	0.641829	-9.48444	0.759237	-4.44172	0.206273	-0.211803	0.100347	-5.2301	0.86204	-3.94052	0.553978	-5.3178	0.505016
(p.Trp.87.Glu)	W	87	E	var	3	-10.6279	1.16896	-6.35298	0.0682123	-0.72337	1.35688	-9.96579	1.3651	-5.88812	0.0645544	-0.742606	0.713292	-5.1161	0.655319	-4.00849	0.113501	-5.62292	1.12891
(p.Trp.87.Phe)	W	87	F	var	3	-7.49136	1.42375	0.165507	0.0436293	0.106176	0.0112575	-5.7018	0.319195	0.279885	0.00783632	0.081537	0.173215	-4.78949	0.400964	0.20427	0.0910309	-4.67831	1.48195
(p.Trp.87.Gly)	W	87	G	var	3	-7.89763	0.449025	-6.0024	0.137688	-0.175442	0.666639	-8.31289	0.174425	-5.28023	0.541029	0.132179	0.0838421	-4.83592	0.341917	-4.10676	0.210006	-4.62661	1.19647
(p.Trp.87.His)	W	87	H	var	3	-10.1718	0.572003	-6.86615	0.438378	-0.215001	0.759875	-10.086	0.185704	-6.86712	0.210887	-0.0140832	0.0528277	-5.19948	1.01922	-4.1611	0.0221586	-5.26553	1.28625
(p.Trp.87.Ile)	W	87	I	var	3	-10.0829	2.14774	-6.38055	0.25319	-0.551046	0.896257	-10.125	1.19264	-6.07461	0.113092	-0.165419	0.207125	-5.08119	0.730153	-4.0509	0.382368	-5.46139	0.528376
(p.Trp.87.Lys)	W	87	K	var	3	-11.6164	0.563308	-6.61077	0.482009	-0.764412	1.32583	-9.83441	0.0156518	-6.35306	1.13975	-0.833268	0.579899	-5.1213	0.854085	-4.4452	0.178546	-5.53452	0.797096
(p.Trp.87.Leu)	W	87	L	var	3	-8.60275	0.411985	-7.64927	0.878176	-0.702867	1.12416	-8.94341	0.779185	-6.574	0.123089	-0.727291	0.508337	-5.35567	0.766514	-4.24374	0.138053	-5.52597	0.463625
(p.Trp.87.Met)	W	87	M	var	3	-6.2259	0.440032	-4.33152	0.683777	-0.320561	0.819589	-6.39145	0.170549	-4.06813	0.015325	0.0498731	0.0323984	-4.91474	0.531878	-3.47653	0.262513	-4.54712	0.887127
(p.Trp.87.Asn)	W	87	N	var	3	-9.89825	2.38443	-6.77392	1.14851	-0.313494	0.587395	-9.84068	0.581883	-5.77777	0.386489	0.100684	0.0594083	-5.0465	0.67833	-4.19776	0.0754676	-2.79926	1.72746
(p.Trp.87.Pro)	W	87	P	var	3	-10.5152	1.32122	-7.29458	0.480484	-0.444618	0.90386	-9.2402	1.0932	-5.93958	0.547495	0.101695	0.0366885	-4.87019	0.532311	-4.22446	0.183569	-5.23368	1.04124
(p.Trp.87.Gln)	W	87	Q	var	3	-9.85613	0.414832	-7.05051	0.4259	-0.428623	0.833553	-9.81387	0.316066	-5.96348	0.275411	-0.136341	0.0261443	-4.92518	0.378392	-4.0827	0.30644	-5.36585	0.414194
(p.Trp.87.Arg)	W	87	R	var	3	-7.18287	0.265092	-5.36749	0.14769	-1.11745	1.5502	-7.51605	0.349832	-5.27212	0.299777	-1.0136	0.723621	-4.84461	0.20411	-3.91675	0.233287	-5.07783	0.402355
(p.Trp.87.Ser)	W	87	S	var	3	-11.0861	1.2974	-5.00351	0.260168	-0.000643237	0.217721	-9.75977	1.04026	-4.32219	0.0922003	0.0685137	0.100191	-4.90173	0.582598	-3.89258	0.150398	-4.64369	1.17689
(p.Trp.87.Thr)	W	87	T	var	3	-10.6534	0.980176	-6.40513	0.376286	-0.226254	0.523156	-9.7831	1.0493	-5.3916	0.317604	0.0302299	0.174659	-5.04938	0.532455	-4.31218	0.436371	-5.57366	0.757771
(p.Trp.87.Val)	W	87	V	var	3	-6.41316	0.47368	-4.9132	0.0636697	-0.128333	0.543909	-6.95994	0.33317	-4.60864	0.139923	0.0878848	0.140634	-4.75424	0.544701	-3.88611	0.231428	-3.77317	1.52707
(p.Trp.87.Tyr)	W	87	Y	var	3	-10.442	1.36342	-6.0787	0.266071	-0.0668299	0.455022	-10.7629	0.235748	-5.25157	0.302575	0.184157	0.0127728	-4.5482	0.460049	-3.7239	0.233614	-4.94024	1.07604
(p.Gly.88.Ter)	G	88	*	var	3	-5.48914	0.167763	-2.69633	0.369011	-0.690948	0.956657	-6.18007	0.27573	-3.86587	0.152457	-0.765249	0.462718	-4.70171	0.463077	-3.15035	0.118804	-4.51454	0.811705
(p.Gly.88.Ala)	G	88	A	var	3	-5.97301	0.0953851	-0.305866	0.219044	0.0892924	0.0669394	-7.04689	0.0240343	-3.0815	0.149593	0.0755871	0.0309129	-4.6694	0.544874	-2.94372	0.276582	-5.07171	0.678464
(p.Gly.88.Cys)	G	88	C	var	3	-6.90861	0.234516	-2.79431	0.377031	0.0296123	0.272383	-7.3899	0.0297733	-4.24203	0.276154	-0.0207263	0.0138992	-4.68291	0.39865	-3.57171	0.110802	-5.22504	0.297745
(p.Gly.88.Asp)	G	88	D	var	3	-5.33478	0.746773	0.0683767	0.187036	0.0772605	0.0227749	-4.82082	0.526315	-0.292915	0.398291	0.0537352	0.118146	-4.05147	0.288201	-0.431659	0.258037	-4.48279	0.455676
(p.Gly.88.Glu)	G	88	E	var	3	-8.85898	0.911368	-2.70104	0.575989	0.131185	0.286906	-8.21914	0.285736	-4.29275	0.297171	0.0801964	0.0714607	-4.94419	0.595215	-3.49685	0.0567676	-5.59023	0.489094
(p.Gly.88.Phe)	G	88	F	var	3	-4.96455	0.218233	-2.51481	0.578597	-0.0346827	0.151381	-6.21381	0.361313	-3.61778	0.0289481	0.0950268	0.177207	-4.02395	0.100582	-3.25003	0.102063	-5.2314	0.949291
(p.88.=)	G	88	G	syn	3	0.14502	0.0922553	0.182297	0.0382779	0.153727	0.0495003	0.0669318	0.0424178	0.147611	0.0645575	0.038606	0.00743737	-0.0147237	0.0998257	0.0868474	0.00248594	0.0334662	0.10947
(p.Gly.88.His)	G	88	H	var	3	-9.59921	1.69568	-0.66727	0.18169	0.0676773	0.0315446	-9.34601	1.42848	-4.38442	0.403307	0.184328	0.0569044	-4.95335	1.01624	-3.33099	0.06261	-5.69546	0.630425
(p.Gly.88.Ile)	G	88	I	var	3	-6.11	0.104091	-2.33135	0.317593	-0.266174	0.667139	-7.27348	0.184131	-4.48828	0.0512714	-0.38827	0.567057	-5.04716	0.487606	-3.73387	0.0443644	-5.28631	0.654746
(p.Gly.88.Lys)	G	88	K	var	3	-4.61447	0.262705	0.241911	0.00133153	0.125412	0.0618566	-6.13027	0.759747	-2.14001	0.118032	-0.0599998	0.300473	-4.12917	0.935538	-1.26035	0.373408	-4.90021	0.405393
(p.Gly.88.Leu)	G	88	L	var	3	-4.3932	0.173165	-1.20352	0.304135	0.0110521	0.0506869	-5.47104	0.274212	-2.40666	0.0305408	0.0316509	0.00525834	-3.64169	0.288252	-2.32866	0.0499163	-4.44825	1.0271
(p.Gly.88.Met)	G	88	M	var	3	-8.82076	1.40188	-1.49163	0.575929	-0.127243	0.166248	-8.97811	0.207928	-4.51224	0.0471173	0.109961	0.0978124	-4.7343	0.414805	-4.26914	0.622185	-5.3466	0.300799
(p.Gly.88.Asn)	G	88	N	var	3	-5.00172	0.228281	0.0558091	0.0517246	-0.137701	0.160069	-4.22883	0.455707	0.161593	0.200362	0.122013	0.0176018	-4.3154	1.31307	-0.135443	0.062184	-3.62214	0.385573
(p.Gly.88.Pro)	G	88	P	var	3	-3.55579	0.398543	-2.18152	0.137024	-0.35339	0.523473	-4.88691	0.0566677	-2.38065	0.288415	-0.404398	0.481301	-3.07763	0.35429	-2.41316	0.105059	-4.03461	0.882024
(p.Gly.88.Gln)	G	88	Q	var	3	-7.95353	1.71845	0.00480516	0.264081	0.286656	0.286357	-9.29195	0.241913	-3.36345	0.117887	0.0875461	0.0192759	-5.08486	0.455419	-2.71056	0.337303	-5.61196	0.816408
(p.Gly.88.Arg)	G	88	R	var	3	-5.12097	0.357378	0.0664662	0.113034	0.0578948	0.0321143	-6.78485	0.0938065	-3.00848	0.0521024	0.0695465	0.0086537	-4.27796	0.478176	-1.79782	0.904334	-4.89387	0.800215
(p.Gly.88.Ser)	G	88	S	var	3	-2.57429	0.150221	0.048418	0.017385	0.0922654	0.0682355	-3.79723	0.0520293	0.145306	0.05612	0.0376888	0.0397152	-3.2849	0.171335	0.102953	0.0761608	-3.36503	1.2152
(p.Gly.88.Thr)	G	88	T	var	3	-2.32894	0.278197	0.209096	0.0177783	0.128537	0.0115925	-5.00081	0.31397	0.270706	0.111157	0.0431161	0.00968123	-3.3825	0.0385019	0.211626	0.167573	-3.36116	1.89964
(p.Gly.88.Val)	G	88	V	var	3	-4.6561	0.10911	-2.96262	0.11135	-0.0562277	0.365032	-5.94006	0.301056	-3.34399	0.0590382	-0.0588542	0.27587	-4.12716	0.266766	-3.10906	0.078101	-5.07018	1.15539
(p.Gly.88.Trp)	G	88	W	var	3	-6.3031	0.177458	-2.93971	0.0281834	-0.170311	0.546597	-7.21157	0.756638	-3.4235	0.0226719	-0.343766	0.255637	-4.53287	0.604846	-3.09878	0.0708159	-5.45967	0.717407
(p.Gly.88.Tyr)	G	88	Y	var	3	-2.76712	0.470369	-0.659223	0.272089	-0.0122785	0.142224	-3.9011	0.281273	-1.96147	0.129355	0.0210856	0.131066	-2.62875	0.123207	-2.08042	0.0198446	-3.14256	0.796824
(p.Ala.89.Ter)	A	89	*	var	3	-6.17186	1.74106	-3.44491	0.106331	-1.01514	1.23809	-6.22879	0.124286	-3.21922	0.308747	-0.526037	0.509127	-4.42905	0.651749	-2.77288	0.034869	-4.22848	1.57696
(p.89.=)	A	89	A	syn	3	0.251042	0.0927158	0.0180181	0.141608	-0.0525339	0.0788019	0.433139	0.0603282	0.200489	0.0372905	0.0723385	0.0437119	0.41405	0.0578848	0.126582	0.0049589	0.473109	0.292468
(p.Ala.89.Cys)	A	89	C	var	3	-4.20203	0.289308	0.0570151	0.208668	0.0243784	0.163831	-5.33584	0.0230102	-0.310738	0.225851	0.0113397	0.0847461	-3.73804	0.129219	-0.300952	0.0393971	-4.80798	1.71118
(p.Ala.89.Asp)	A	89	D	var	3	0.463567	0.0478604	0.322628	0.0218257	0.338138	0.112224	0.357914	0.0341474	0.124595	0.0519846	-0.0398819	0.119436	0.295686	0.185237	0.0177064	0.0917133	0.73888	0.296656
(p.Ala.89.Glu)	A	89	E	var	3	0.132355	0.11856	0.055221	0.0686265	0.0924826	0.149372	0.214758	0.0214944	0.0940055	0.019689	-0.0738128	0.12269	0.0772093	0.0856228	0.109199	0.16667	0.289838	0.134875
(p.Ala.89.Phe)	A	89	F	var	3	-0.782171	0.218159	0.284961	0.181552	0.287222	0.238491	-2.36584	0.140236	0.265616	0.102489	0.0285232	0.0328271	-1.89381	0.0456336	0.182595	0.173753	-2.44808	1.65486
(p.Ala.89.Gly)	A	89	G	var	3	0.213183	0.127772	0.195728	0.114106	0.129739	0.0314247	0.0891991	0.0562938	0.173184	0.056573	0.0571802	0.0738755	0.0406212	0.074784	0.121228	0.0486257	0.439593	0.0259281
(p.Ala.89.His)	A	89	H	var	3	-0.24044	0.485353	0.241931	0.154927	0.193762	0.0998196	-0.580053	0.190814	0.262563	0.0894071	-0.0125147	0.1188	-0.478509	0.100747	0.0889668	0.232198	-0.164711	0.258971
(p.Ala.89.Ile)	A	89	I	var	3	-0.687384	0.15603	0.268265	0.0546496	0.105816	0.0783842	-2.8605	0.842596	0.0900557	0.0194752	-0.0549378	0.004717	-1.81025	0.188604	0.139462	0.0985949	-2.24855	1.46535
(p.Ala.89.Lys)	A	89	K	var	3	-0.41993	0.058073	0.0760337	0.012562	0.13373	0.0107779	-0.791853	0.155076	0.0272544	0.0624484	-0.0888117	0.064796	-0.623408	0.0490392	-0.0186836	0.0863434	-0.587092	0.394803
(p.Ala.89.Leu)	A	89	L	var	3	-1.39762	0.310802	0.0812265	0.0410986	-0.00218537	0.105711	-3.59231	0.4343	0.0632463	0.0613287	-0.113017	0.142463	-2.27146	0.243796	0.0646564	0.0241497	-2.52682	1.7062
(p.Ala.89.Met)	A	89	M	var	3	0.0402667	0.256738	0.351049	0.2349	0.298451	0.0957096	-0.830629	0.180279	0.195237	0.0428571	-0.07401	0.488248	-0.590699	0.233433	0.0937505	0.244225	-0.740751	0.649568
(p.Ala.89.Asn)	A	89	N	var	3	-0.85435	0.274872	0.183398	0.0836565	-0.0543055	0.338765	-1.23464	0.340759	0.215678	0.113035	0.0691318	0.171113	-0.841758	0.0784699	0.0179729	0.109705	-0.72959	0.998585
(p.Ala.89.Pro)	A	89	P	var	3	0.337141	0.0889169	0.0989066	0.180859	0.144631	0.158993	0.309207	0.000350478	0.0392487	0.0101255	0.0255383	0.239245	0.509663	0.0804009	0.0418472	0.0555886	0.230177	0.0701559
(p.Ala.89.Gln)	A	89	Q	var	3	0.130599	0.208889	0.125796	0.272176	0.222938	0.169531	-0.306111	0.0811696	0.146799	0.192098	-0.0369643	0.0354474	-0.282125	0.0480311	0.00606406	0.129046	-0.0988308	0.0651342
(p.Ala.89.Arg)	A	89	R	var	3	-0.193828	0.270095	0.196068	0.140476	0.150863	0.0301318	-0.463397	0.0911147	0.190277	0.0577169	0.0388466	0.0133698	-0.237272	0.149753	0.213461	0.157576	-0.226424	0.284342
(p.Ala.89.Ser)	A	89	S	var	3	-0.00402191	0.200534	0.169079	0.140156	0.0981678	0.0734037	-0.0703024	0.0165588	0.154587	0.0143737	0.0230262	0.0940573	-0.0328528	0.0454945	0.168645	0.0904952	0.25531	0.0116964
(p.Ala.89.Thr)	A	89	T	var	3	-0.0113151	0.0322919	-0.0316226	0.0160568	0.21785	0.200485	-0.0851216	0.00762901	0.0894766	0.164067	-0.0291092	0.0192132	-0.169443	0.0965648	-0.0227685	0.134459	0.30861	0.263112
(p.Ala.89.Val)	A	89	V	var	3	-0.491098	0.24766	0.185014	0.0899676	0.121788	0.0415026	-1.49601	0.625553	0.09566	0.0230847	-0.0199816	0.00360806	-0.826874	0.0119167	0.116314	0.0313745	-1.31928	1.06225
(p.Ala.89.Trp)	A	89	W	var	3	-0.599015	0.275661	0.179024	0.0939757	0.0651478	0.243132	-2.09177	0.79579	0.123471	0.0820133	0.0561641	0.0986033	-1.11725	0.132209	0.148127	0.169016	-1.80538	0.968151
(p.Ala.89.Tyr)	A	89	Y	var	3	-0.487429	0.390375	0.176614	0.0689863	-0.0501839	0.0219156	-2.12976	0.329524	0.0236224	0.0436412	-0.111848	0.17406	-1.34118	0.0868368	-0.0320225	0.14566	-1.85975	1.19416
(p.Lys.90.Ter)	K	90	*	var	3	-4.14732	0.670387	-3.03787	0.055153	-0.757993	1.17397	-4.94137	0.173618	-3.21507	0.210394	-0.651706	0.313047	-3.93796	0.361561	-2.80967	0.100173	-3.89472	0.505164
(p.Lys.90.Ala)	K	90	A	var	3	0.590665	0.0648132	0.18228	0.193603	0.126379	0.0552862	0.706928	0.0249953	0.140463	0.0580536	0.0617916	0.0548325	0.671286	0.154275	0.110797	0.140327	0.920048	0.368716
(p.Lys.90.Cys)	K	90	C	var	3	-2.94726	0.230256	0.22603	0.154875	0.0148216	0.352367	-2.88222	0.491552	-0.0526981	0.110841	-0.155372	0.203135	-2.5975	0.208382	0.0325625	0.163425	-2.815	0.350164
(p.Lys.90.Asp)	K	90	D	var	3	0.747064	0.00317945	0.233959	0.206824	0.138978	0.120964	0.872237	0.0826705	0.284053	0.174413	0.0802184	0.141056	0.694391	0.0829716	0.218859	0.0492349	1.07489	0.318726
(p.Lys.90.Glu)	K	90	E	var	3	0.602612	0.0262815	0.179526	0.0828887	0.190059	0.0522459	0.76639	0.12437	0.22787	0.0235654	0.0808358	0.134096	0.643667	0.0645292	0.171938	0.0221541	1.03763	0.554896
(p.Lys.90.Phe)	K	90	F	var	3	-0.952027	0.208779	0.08928	0.0414852	-0.0365262	0.0101571	-2.14329	0.548064	0.0965448	0.0744047	-0.0634916	0.143747	-1.2835	0.493125	0.125315	0.160763	-1.84833	1.07782
(p.Lys.90.Gly)	K	90	G	var	3	0.345461	0.0352621	0.178988	0.148831	0.113476	0.0289983	0.355509	0.0446033	0.18126	0.025115	0.0311274	0.0966305	0.347507	0.0705125	0.150501	0.0159841	0.622022	0.156816
(p.Lys.90.His)	K	90	H	var	3	0.16534	0.172952	0.149921	0.0928769	-0.151468	0.121001	-0.187096	0.0564619	0.267448	0.00622269	0.321077	0.111671	-0.201797	0.150759	0.199233	0.0563305	-0.0545204	0.249285
(p.Lys.90.Ile)	K	90	I	var	3	0.519092	0.0616907	0.153513	0.112975	0.110311	0.0404363	0.334611	0.0973529	0.0357164	0.0995768	-0.0147964	0.0533978	0.382842	0.0520238	0.0236003	0.0221327	0.48721	0.134805
(p.90.=)	K	90	K	syn	3	0.0526974	0.00602186	-0.105865	0.0276061	-0.235946	0.189243	0.243705	0.0821736	0.142849	0.159378	-0.0214778	0.160421	0.165285	0.0559176	0.0125282	0.0547953	0.323079	0.292388
(p.Lys.90.Leu)	K	90	L	var	3	0.493675	0.0145179	0.206137	0.122848	0.0692553	0.0749715	0.443934	0.0616447	0.145759	0.0263792	-0.0237398	0.0434781	0.442882	0.0416735	0.169492	0.00196126	0.418482	0.158083
(p.Lys.90.Met)	K	90	M	var	3	0.537739	0.017942	0.290673	0.131272	0.191731	0.103743	0.581016	0.186938	0.181496	0.0886341	0.0295879	0.34288	0.517651	0.147913	0.148855	0.238507	0.53866	0.371798
(p.Lys.90.Asn)	K	90	N	var	3	0.358912	0.155429	0.107191	0.0513848	0.0350054	0.0591944	0.503021	0.295771	0.0208767	0.121477	0.14496	0.275458	0.484107	0.0998177	0.11304	0.0708322	0.804013	0.397003
(p.Lys.90.Pro)	K	90	P	var	3	0.415975	0.122595	0.286098	0.113024	0.0966368	0.320046	0.14094	0.169102	0.0981956	0.120038	-0.0175103	0.118219	0.349607	0.130901	0.0293726	0.149407	0.170061	0.137641
(p.Lys.90.Gln)	K	90	Q	var	3	0.559452	0.160748	0.189334	0.14351	0.195373	0.207009	0.857506	0.207608	0.169356	0.109729	0.115134	0.147887	0.723406	0.129157	0.123615	0.17284	0.978859	0.508751
(p.Lys.90.Arg)	K	90	R	var	3	0.58798	0.11855	0.207898	0.187501	0.117245	0.0778837	0.633634	0.0855075	0.111508	0.0530151	0.0325153	0.0778358	0.563321	0.0224058	0.130842	0.0124723	0.58795	0.229051
(p.Lys.90.Ser)	K	90	S	var	3	0.575058	0.00975728	0.184554	0.149139	0.0903728	0.0278617	0.66787	0.00935944	0.155445	0.096885	-0.0552574	0.0324102	0.615591	0.156243	0.12258	0.0797016	0.823175	0.332147
(p.Lys.90.Thr)	K	90	T	var	3	0.757293	0.0298737	0.23007	0.0137819	0.189659	0.121382	0.506351	0.041606	0.0551411	0.0222588	-0.0648555	0.121703	0.567946	0.0267222	0.092829	0.0311784	0.661819	0.26135
(p.Lys.90.Val)	K	90	V	var	3	0.612147	0.0363916	0.26599	0.0806136	0.139294	0.0355158	0.560233	0.0690188	0.208844	0.0110349	0.135301	0.0169322	0.615618	0.00346135	0.209368	0.00735311	0.583873	0.0931702
(p.Lys.90.Trp)	K	90	W	var	3	0.274539	0.145319	0.160151	0.0252302	0.129451	0.0472728	-0.492405	0.664425	0.204002	0.233164	0.0665894	0.245775	-0.0944983	0.212139	0.223239	0.179439	-0.401883	0.722412
(p.Lys.90.Tyr)	K	90	Y	var	3	-0.0386235	0.291773	0.103811	0.221169	0.116778	0.209525	-0.76108	0.721827	0.184099	0.0568801	0.0766652	0.0225356	-0.391585	0.0150246	0.213914	0.0220491	-0.836802	0.77215
(p.Asn.91.Ter)	N	91	*	var	3	-7.15579	0.414143	-2.6245	0.228698	-0.671172	0.874963	-7.75242	0.146607	-3.27949	0.033438	-0.55264	0.480411	-4.88595	0.560255	-2.90754	0.250544	-4.5365	1.08869
(p.Asn.91.Ala)	N	91	A	var	3	-1.96407	0.168956	0.208355	0.2486	0.142635	0.117811	-3.21367	0.559223	0.124366	0.10404	-0.0027681	0.131163	-2.36189	0.0290079	0.0713429	0.0357438	-2.02719	1.36716
(p.Asn.91.Cys)	N	91	C	var	3	-7.36177	1.4068	-1.86869	0.355296	0.0542581	0.159403	-7.40954	0.392413	-2.32698	0.253647	0.132598	0.0805298	-4.28097	0.416882	-2.3207	0.133879	-4.73309	1.51752
(p.Asn.91.Asp)	N	91	D	var	3	-5.06702	0.428135	-2.25948	0.0327819	0.0590647	0.306031	-5.53516	0.165781	-3.09734	0.317079	0.00199993	0.193458	-3.96056	0.258235	-2.54717	0.24292	-4.3831	0.675406
(p.Asn.91.Glu)	N	91	E	var	3	-4.64629	0.779942	0.210562	0.0857277	0.171082	0.173927	-5.30739	0.565757	-0.0728115	0.232894	0.0431494	0.0438644	-4.20901	0.209765	-0.279228	0.17177	-4.26047	1.53692
(p.Asn.91.Phe)	N	91	F	var	3	-9.37825	0.683503	-3.88223	0.363885	-0.335154	0.334538	-9.11544	0.411517	-4.02808	0.250707	0.0973943	0.12176	-5.12287	0.971368	-3.87127	0.14607	-5.74619	1.62156
(p.Asn.91.Gly)	N	91	G	var	3	-1.95637	0.350685	0.193977	0.106035	0.146898	0.0467042	-2.37364	0.218328	0.208738	0.025906	0.064339	0.00296657	-2.10522	0.157562	0.186812	0.0546603	-1.38402	1.17231
(p.Asn.91.His)	N	91	H	var	3	-7.86718	0.198993	-0.0576228	0.17522	0.0624539	0.108442	-6.07467	0.229327	-0.0412784	0.190127	-0.0721175	0.019836	-4.5797	0.354528	-0.503593	0.0242108	-4.20735	2.33943
(p.Asn.91.Ile)	N	91	I	var	3	-4.67508	0.404549	-0.725228	0.429542	0.0824137	0.0989231	-5.03427	0.208899	-2.53615	0.0262577	-0.00832183	0.057192	-4.03407	0.385967	-2.28352	0.073709	-3.92426	0.569391
(p.Asn.91.Lys)	N	91	K	var	3	-4.2594	0.438143	0.195915	0.0103329	0.0696241	0.156147	-4.46983	0.136928	0.143057	0.0335512	0.0880428	0.148938	-3.85073	0.131178	0.125777	0.0682707	-3.57795	1.29741
(p.Asn.91.Leu)	N	91	L	var	3	-4.82584	0.915142	0.287691	0.231443	0.0646807	0.118116	-5.71033	0.0353455	-0.128053	0.339967	-0.0521611	0.0441392	-4.53001	0.25898	-0.459592	0.350202	-4.77253	1.98272
(p.Asn.91.Met)	N	91	M	var	3	-8.35598	0.770563	0.307556	0.120106	0.237909	0.117906	-5.81835	0.27684	-0.058315	0.0889501	-0.130518	0.115205	-5.31255	0.32583	-0.897276	0.230109	-5.43809	1.39982
(p.91.=)	N	91	N	syn	3	0.266475	0.1356	0.265078	0.129711	0.198949	0.0524836	0.0578461	0.0962957	0.10825	0.147637	0.188344	0.104116	-0.00295568	0.0315079	0.247818	0.102756	-0.0733343	0.242879
(p.Asn.91.Pro)	N	91	P	var	3	-3.82157	0.540257	0.234753	0.0503879	0.148788	0.052104	-6.21149	0.109567	-0.266033	0.384216	-0.120031	0.170204	-4.49864	0.0556038	-0.168237	0.39114	-4.04959	1.20499
(p.Asn.91.Gln)	N	91	Q	var	3	-2.37293	0.0614461	0.246988	0.162508	0.200704	0.135121	-4.14615	0.0632285	0.125017	0.0386223	0.09146	0.00290967	-2.651	0.165152	0.208627	0.00181856	-2.00324	1.5286
(p.Asn.91.Arg)	N	91	R	var	3	-4.49971	0.695392	0.189853	0.10558	0.139503	0.0708328	-4.62476	0.00591881	0.0982335	0.0117366	0.0304887	0.0634017	-4.34499	0.387808	0.10966	0.0315823	-3.70229	2.05688
(p.Asn.91.Ser)	N	91	S	var	3	-2.60871	0.341723	0.237267	0.0581575	0.137538	0.0776467	-3.03691	0.037964	0.125977	0.0518396	0.0187626	0.158645	-2.40984	0.299047	0.137059	0.024334	-1.09474	0.640448
(p.Asn.91.Thr)	N	91	T	var	3	-3.52384	0.276801	0.283835	0.0645129	0.218461	0.119601	-3.62214	0.0188629	0.335815	0.0622381	0.203578	0.117416	-3.0658	0.0204836	0.291486	0.144179	-1.43445	1.21347
(p.Asn.91.Val)	N	91	V	var	3	-7.86589	1.39658	-1.05531	0.420923	0.0736617	0.164782	-7.59553	0.107615	-2.82234	0.228112	0.0415976	0.0701332	-4.68009	0.306196	-2.85919	0.111805	-4.89767	1.17765
(p.Asn.91.Trp)	N	91	W	var	3	-7.85985	1.48736	-0.293859	0.104781	0.127605	0.0956785	-8.12165	0.86964	-2.47532	0.748932	0.0538393	0.0108674	-5.0475	0.432447	-3.53454	0.233487	-3.87305	2.08945
(p.Asn.91.Tyr)	N	91	Y	var	3	-4.17965	1.02601	-1.62117	0.302678	-0.246574	0.667525	-4.71923	0.062391	-1.58531	0.0336719	0.280377	0.18063	-3.90191	0.0819633	-1.50357	0.0212467	-3.42925	0.784109
(p.Thr.92.Ter)	T	92	*	var	3	-11.4293	0.121616	-5.87425	0.628627	-1.20159	1.65496	-11.9355	0.162861	-6.25516	0.305289	-1.17305	0.78522	-5.06045	0.316141	-4.08189	0.0560052	-5.66551	0.971688
(p.Thr.92.Ala)	T	92	A	var	3	-5.83394	0.0704563	-4.26697	0.151243	-0.00574737	0.182462	-5.9323	0.272722	-4.10446	0.0577602	-0.0304459	0.0724829	-4.22939	0.126063	-3.45754	0.0802453	-4.72798	0.456646
(p.Thr.92.Cys)	T	92	C	var	3	-8.52155	0.219574	-1.72972	0.232649	-0.0190541	0.138324	-7.05434	0.149536	-3.37405	0.726117	0.105829	0.00790522	-4.42966	0.585239	-2.57994	0.705512	-5.24708	1.14042
(p.Thr.92.Asp)	T	92	D	var	3	-7.04204	0.294453	-5.36383	0.556077	-0.523549	1.17772	-9.59382	1.82103	-5.33975	0.116899	-1.35494	0.859652	-5.01441	0.800112	-4.31661	0.256229	-6.06639	0.0057622
(p.Thr.92.Glu)	T	92	E	var	3	-9.81712	0.104448	-5.19302	0.170151	-0.0386924	0.444893	-10.2592	0.803862	-5.48149	0.105616	-0.20528	0.281423	-5.0867	0.476426	-4.09712	0.0703744	-6.09221	0.227771
(p.Thr.92.Phe)	T	92	F	var	3	-6.06959	0.576638	-4.12654	0.443013	-0.947363	1.41533	-6.55604	0.18675	-4.2183	0.0260602	-1.16781	0.894677	-4.72658	0.142423	-3.59657	0.120025	-5.17148	0.554826
(p.Thr.92.Gly)	T	92	G	var	3	-8.23597	0.201822	-5.12082	0.0879422	-0.0551436	0.434646	-8.88084	0.310841	-5.25337	0.107104	-0.143111	0.186681	-5.00943	0.605891	-3.99688	0.194055	-5.60337	0.453448
(p.Thr.92.His)	T	92	H	var	3	-3.7481	0.0893753	-2.44249	0.0226506	-0.68748	1.215	-4.17697	0.814252	-2.85645	0.0734254	-0.902393	0.946273	-3.03653	0.191079	-2.49964	0.260333	-4.48562	1.6162
(p.Thr.92.Ile)	T	92	I	var	3	-4.92439	0.123387	-4.20921	0.167627	-0.551477	0.954257	-4.98003	0.0299858	-3.96463	0.148477	-0.151667	0.194632	-3.79458	0.422496	-3.23205	0.174122	-4.15171	0.473614
(p.Thr.92.Lys)	T	92	K	var	3	-8.63967	0.116586	-6.46557	0.0642179	-0.899244	1.20222	-7.70638	1.17207	-5.64847	0.303831	-1.00372	0.757715	-4.61188	0.221559	-3.96385	0.59156	-5.61548	0.650188
(p.Thr.92.Leu)	T	92	L	var	3	-7.73709	0.501744	-5.83058	0.062315	-0.62417	1.1046	-9.26141	0.820559	-5.50034	0.114217	-0.535408	0.54808	-5.06391	0.343628	-4.16544	0.104884	-5.75768	0.546981
(p.Thr.92.Met)	T	92	M	var	3	-6.97717	0.667004	-1.03114	0.171694	0.291515	0.193803	-6.91223	0.716315	-2.41521	0.929091	0.0919139	0.0229168	-5.01313	0.403557	-1.93368	0.424574	-5.11591	0.506522
(p.Thr.92.Asn)	T	92	N	var	3	-8.65061	1.8633	-0.032117	0.311179	0.176881	0.302136	-9.47157	0.402409	-4.12118	0.345353	0.131799	0.290109	-4.72511	1.03786	-3.1339	0.423237	-5.86758	0.763395
(p.Thr.92.Pro)	T	92	P	var	3	-7.28739	1.20886	-5.03191	0.254089	-0.856621	1.42454	-8.38546	0.201733	-4.92387	0.116332	-0.979599	0.878422	-5.10121	0.415987	-3.6519	0.329325	-5.74826	0.35718
(p.Thr.92.Gln)	T	92	Q	var	3	-9.69772	0.571099	-0.714567	0.241776	0.134714	0.134647	-8.91599	0.338948	-4.69711	0.14151	0.184829	0.13444	-4.85878	0.443996	-3.60751	0.0144308	-5.17218	0.177958
(p.Thr.92.Arg)	T	92	R	var	3	-8.03433	0.648175	-5.41907	0.351383	-0.997961	1.54353	-8.40833	0.568738	-5.6336	0.112913	-1.0779	0.709329	-5.23399	0.711868	-4.03654	0.191645	-5.58147	0.281883
(p.Thr.92.Ser)	T	92	S	var	3	-2.66932	0.496708	0.235482	0.11709	0.137802	0.051575	-5.07342	0.317994	0.097108	0.118674	0.0561669	0.0188626	-4.11353	0.0288026	0.0678768	0.0705633	-3.7926	1.76146
(p.92.=)	T	92	T	syn	3	0.0972514	0.183685	0.0398196	0.0776162	0.139551	0.164609	-0.138107	0.136182	-0.0242781	0.120441	0.00522999	0.245436	-0.0709526	0.20413	0.00412264	0.105731	-0.145265	0.107742
(p.Thr.92.Val)	T	92	V	var	3	-10.784	0.0942108	-5.42712	0.199751	-0.250028	0.606786	-9.56944	0.555502	-4.8406	0.327079	0.0739913	0.0783965	-5.02048	0.688849	-4.00335	0.0346778	-5.50085	0.574973
(p.Thr.92.Trp)	T	92	W	var	3	-11.547	1.33069	-6.37896	0.291894	-1.03878	1.53612	-10.9925	1.67663	-5.86947	0.101608	-1.23639	0.900237	-5.35373	0.558194	-4.36309	0.381255	-6.10101	0.104371
(p.Thr.92.Tyr)	T	92	Y	var	3	-10.6276	0.580877	-5.84232	0.603103	-0.913116	1.25622	-10.5713	0.279648	-6.26742	0.639951	-1.22855	0.93612	-5.23195	0.589439	-4.18822	0.275924	-6.14726	0.748219
(p.Ala.93.Ter)	A	93	*	var	3	-3.97291	0.618067	-2.53792	0.0611713	-0.407137	0.559585	-4.3472	0.197866	-2.59531	0.186192	-0.239901	0.117443	-3.66918	0.24599	-2.50419	0.020279	-3.45821	0.118096
(p.93.=)	A	93	A	syn	3	0.368988	0.0102526	0.139114	0.0957697	0.092489	0.0652186	0.572613	0.244576	0.0971136	0.0766576	0.0550757	0.0510463	0.440311	0.037869	0.144191	0.120222	0.55021	0.300729
(p.Ala.93.Cys)	A	93	C	var	3	-4.5243	0.746276	0.244652	0.165642	0.159599	0.0281432	-4.49319	0.213175	0.090352	0.0694938	0.00710388	0.134748	-3.9363	0.211288	0.140723	0.153775	-4.14912	1.48518
(p.Ala.93.Asp)	A	93	D	var	3	-0.00965811	0.0325197	0.247377	0.0620729	0.199489	0.0515299	-0.367792	0.0668092	0.0897597	0.0650778	0.0694411	0.124736	-0.200481	0.183927	0.148135	0.141464	-0.12625	0.134894
(p.Ala.93.Glu)	A	93	E	var	3	0.473996	0.0480169	0.16593	0.0718568	0.166848	0.138875	0.542483	0.103601	0.130118	0.0690261	-0.00700459	0.0566903	0.48776	0.0653984	0.101831	0.079785	0.666384	0.355197
(p.Ala.93.Phe)	A	93	F	var	3	0.262385	0.214234	0.0653288	0.0336768	-0.0752134	0.0646737	0.28691	0.0238063	0.12371	0.0518305	0.0366284	0.112468	0.282699	0.0700075	0.102208	0.298654	-0.111835	0.132118
(p.Ala.93.Gly)	A	93	G	var	3	0.0281952	0.136095	0.194713	0.0824683	0.166313	0.0650983	-0.134655	0.00756228	0.164806	0.0603325	0.0100794	0.109763	-0.112004	0.144009	0.0999782	0.0957932	-0.152995	0.191409
(p.Ala.93.His)	A	93	H	var	3	0.319166	0.0708904	0.304661	0.183165	0.231865	0.00428826	0.173268	0.119089	0.140935	0.0379163	0.0229766	0.0569207	0.0359969	0.0556551	0.0284114	0.249176	0.0444687	0.0677023
(p.Ala.93.Ile)	A	93	I	var	3	0.403566	0.132667	0.0733539	0.165889	0.0708753	0.0882577	0.606459	0.0358879	0.137382	0.0403263	-0.0499451	0.0616712	0.532394	0.0355594	-0.0476479	0.000187878	0.538014	0.236975
(p.Ala.93.Lys)	A	93	K	var	3	0.45185	0.0972865	0.18181	0.104857	0.178196	0.0320296	0.372625	0.120386	0.085737	0.179672	-0.0542144	0.108549	0.295066	0.132108	0.0203266	0.134415	0.291762	0.0685599
(p.Ala.93.Leu)	A	93	L	var	3	0.444214	0.00989609	0.144764	0.0380621	0.0579555	0.0877195	0.644054	0.132493	0.211893	0.00711929	0.0667062	0.0582305	0.525717	0.10388	0.10013	0.126914	0.504723	0.22965
(p.Ala.93.Met)	A	93	M	var	3	0.594136	0.00838837	0.188592	0.0366809	0.0523274	0.0274859	0.680866	0.0917172	0.190608	0.0135252	0.00422707	0.14842	0.508772	0.0246573	0.136977	0.0389977	0.624667	0.29497
(p.Ala.93.Asn)	A	93	N	var	3	0.251165	0.128327	0.0968119	0.115828	0.143932	0.0860405	0.320476	0.172933	0.20533	0.121487	0.0764861	0.188081	0.289528	0.179086	0.115507	0.253622	0.326462	0.12476
(p.Ala.93.Pro)	A	93	P	var	3	-4.23135	0.019088	-2.76757	0.175423	-0.422864	0.611948	-5.13696	0.44198	-2.49945	0.0333901	-0.0541015	0.0944572	-3.78608	0.321783	-2.41077	0.0148359	-3.62802	0.588156
(p.Ala.93.Gln)	A	93	Q	var	3	0.41431	0.0796226	0.160159	0.000207703	0.193338	0.118283	0.468032	0.104199	0.189173	0.0190157	-0.0115001	0.00723264	0.357286	0.0343761	0.16744	0.0973021	0.346055	0.0863679
(p.Ala.93.Arg)	A	93	R	var	3	0.455853	0.100141	0.18196	0.0992743	0.144398	0.0860019	0.519685	0.130255	0.16633	0.0805808	0.0347234	0.145385	0.416921	0.0776439	0.113286	0.0863865	0.341378	0.0564688
(p.Ala.93.Ser)	A	93	S	var	3	0.373695	0.0534031	0.19177	0.0610769	0.0664127	0.00226008	0.486022	0.177747	0.150061	0.0628276	0.0187115	0.0430792	0.368883	0.130322	0.11398	0.142815	0.40113	0.0746117
(p.Ala.93.Thr)	A	93	T	var	3	0.568297	0.0132617	0.186434	0.0379077	0.120458	0.0341086	0.547634	0.0214747	0.0680307	0.00878779	-0.0616032	0.106421	0.451066	0.0254407	0.0997114	0.0301817	0.410884	0.160372
(p.Ala.93.Val)	A	93	V	var	3	0.386772	0.0585045	0.124785	0.100492	0.123692	0.0974247	0.446523	0.0636879	0.123609	0.0250556	-0.0399581	0.0865364	0.352085	0.00784044	0.0805545	0.0535309	0.386679	0.1261
(p.Ala.93.Trp)	A	93	W	var	3	0.0763979	0.204987	0.208127	0.181321	0.113096	0.118123	-0.059774	0.0399082	0.140053	0.0390057	0.0460463	0.131566	-0.0394805	0.140949	0.0998642	0.0501323	-0.171611	0.275704
(p.Ala.93.Tyr)	A	93	Y	var	3	0.426805	0.088047	0.195402	0.0578226	0.21022	0.228375	0.567677	0.0361255	0.0466386	0.00398364	0.0393975	0.127048	0.345824	0.0828921	0.0910532	0.304317	0.325747	0.31678
(p.Ala.94.Ter)	A	94	*	var	3	-5.89237	0.00363392	-5.92901	0.718741	-1.19048	1.65482	-7.85522	0.265104	-5.79731	0.309337	-0.778331	0.680167	-4.5974	0.214128	-3.53505	0.501497	-5.42116	0.313747
(p.94.=)	A	94	A	syn	3	0.1915	0.118958	0.100717	0.133623	0.0637828	0.0703296	0.0976622	0.0995052	0.0875826	0.107499	-0.0278987	0.0218938	0.042967	0.050556	0.0394071	0.0726797	-0.0172113	0.0554644
(p.Ala.94.Cys)	A	94	C	var	3	-3.8718	0.913088	0.307979	0.169025	0.152175	0.0491711	-4.34035	0.119843	0.0566225	0.27383	-0.0838742	0.233788	-2.94284	0.132676	0.0808892	0.378779	-3.19622	1.75158
(p.Ala.94.Asp)	A	94	D	var	3	-0.109988	0.0365555	0.0782147	0.0111946	0.0843142	0.266229	-2.76806	0.872251	0.0348907	0.214084	-0.031928	0.196118	-1.07776	0.170074	0.0791882	0.397537	-1.817	1.10483
(p.Ala.94.Glu)	A	94	E	var	3	0.0216013	0.142128	0.219888	0.090147	0.204606	0.00642277	-0.675302	0.295144	0.0284873	0.0738914	-0.0204611	0.0472567	-0.508426	0.0186984	0.10863	0.012766	-0.669945	0.623559
(p.Ala.94.Phe)	A	94	F	var	3	0.854734	0.531661	0.13263	0.632451	0.593378	0.750969	0.866266	0.273581	0.0886326	0.142238	-0.295277	0.50591	1.00359	0.210881	0.380711	0.334255	0.789645	0.64209
(p.Ala.94.Gly)	A	94	G	var	3	-0.200599	0.122989	0.124152	0.0382229	0.109233	0.0170389	-1.38057	0.642451	0.0919234	0.0291437	-0.00551046	0.044806	-0.826276	0.0535916	0.0837878	0.048828	-1.53472	1.2302
(p.Ala.94.His)	A	94	H	var	3	0.511697	0.304508	0.269617	0.126291	0.231031	0.00672834	0.593627	0.464534	0.582319	0.345505	0.235103	0.185196	0.762424	0.108315	0.278604	0.167013	-0.170825	0.754012
(p.Ala.94.Ile)	A	94	I	var	3	0.238182	0.0693632	0.0699015	0.172115	-0.000230613	0.259416	-0.0048967	0.567702	-0.0556954	0.856084	0.0210953	0.603774	-0.0686666	0.629086	-0.0311411	0.64426	-0.434497	0.457789
(p.Ala.94.Lys)	A	94	K	var	3	0.393436	0.0346695	0.152487	0.00442958	-0.0464789	0.128751	0.333367	0.193901	0.0305511	0.205365	-0.0253775	0.0881581	0.091357	0.0977112	-0.0116404	0.282404	-0.0547743	0.00941868
(p.Ala.94.Leu)	A	94	L	var	3	0.795065	0.129767	0.155582	0.0574965	0.127439	0.0816494	0.715955	0.0912352	0.106749	0.110552	-0.0383008	0.0777773	0.46557	0.0282452	0.0200485	0.0573886	-0.0926325	0.171362
(p.Ala.94.Met)	A	94	M	var	3	0.412289	0.0876862	0.378271	0.140682	0.180752	0.00186758	0.220475	0.232968	0.231257	0.160528	0.45298	0.129049	0.373087	0.522518	0.491905	0.371453	-0.0309959	0.686434
(p.Ala.94.Asn)	A	94	N	var	3	0.0717552	0.0696434	0.0951786	0.0537184	-0.0130788	0.0746115	0.359313	2.53384e-05	0.275665	0.0908681	0.220452	0.12535	0.350676	0.0949998	0.14653	0.0637838	0.245862	0.0847766
(p.Ala.94.Pro)	A	94	P	var	3	-5.07989	0.358036	-3.53229	0.39813	-0.0372392	0.242986	-5.8642	0.563489	-2.89682	0.540723	0.140645	0.016982	-3.97592	0.36355	-3.0127	0.397904	-4.73239	0.710154
(p.Ala.94.Gln)	A	94	Q	var	3	0.15348	0.130513	0.0596761	0.193817	0.0252049	0.0600885	0.127575	0.0530574	0.153683	0.10555	0.0531653	0.00384019	0.224388	0.0062488	0.142855	0.043597	0.0836584	0.403163
(p.Ala.94.Arg)	A	94	R	var	3	0.205831	0.0776822	0.0754676	0.0587845	0.0579695	0.0681816	0.13032	0.0504766	0.133252	0.0892095	-0.0117546	0.112773	0.041729	0.0967719	0.102832	0.124147	-0.270145	0.277337
(p.Ala.94.Ser)	A	94	S	var	3	0.187648	0.0955868	0.0679527	0.156275	0.103738	0.303127	0.0499687	0.154886	0.0961226	0.118638	-0.0258759	0.0407736	0.239654	0.111129	0.044518	0.123206	-0.170969	0.0230818
(p.Ala.94.Thr)	A	94	T	var	3	0.154592	0.165545	0.160906	0.0322526	0.103214	0.0347968	-0.100943	0.0490078	0.0258731	0.0716005	-0.0319815	0.0296034	-0.183652	0.0169548	0.0121362	0.0877545	-0.313383	0.202498
(p.Ala.94.Val)	A	94	V	var	3	0.0917889	0.155233	0.122964	0.0837279	0.0736372	0.0266182	-0.0797377	0.038963	0.141909	0.0224949	0.0587549	0.0164553	-0.124213	0.0544103	0.126566	0.0142359	-0.506895	0.479085
(p.Ala.94.Trp)	A	94	W	var	3	-0.458062	0.2767	0.130412	0.0261995	0.0649513	0.13407	-4.78683	0.571758	-0.121153	0.0416699	-0.148189	0.0505551	-3.14154	0.62798	-0.155821	0.0368149	-4.17024	1.74958
(p.Ala.94.Tyr)	A	94	Y	var	3	0.585881	0.101568	0.209995	0.215281	-0.0713208	0.133446	0.774411	0.152436	0.256394	0.201459	0.0313974	0.0278842	0.744921	0.0877153	0.0919201	0.199406	0.489115	0.253047
(p.Leu.95.Ter)	L	95	*	var	3	-9.40699	1.33501	-4.38268	0.348293	-1.11716	1.58347	-9.02569	0.185491	-4.94879	0.221339	-1.00636	0.893341	-4.8499	0.469156	-3.60627	0.0500573	-5.39898	0.640459
(p.Leu.95.Ala)	L	95	A	var	3	-9.93412	3.29666	0.138778	0.088872	0.0233357	0.0814451	-6.38972	0.385878	0.0308081	0.291389	0.0479746	0.115234	-4.82501	0.472323	-0.0428724	0.0310466	-5.0678	1.03351
(p.Leu.95.Cys)	L	95	C	var	3	-9.47909	1.34297	-0.370243	0.265939	0.119527	0.174667	-8.10347	0.92829	-1.36965	1.15915	-0.0166063	0.205845	-4.57571	0.843715	-1.15582	0.78879	-5.31641	0.723807
(p.Leu.95.Asp)	L	95	D	var	3	-9.62461	0.537514	-4.36555	0.489211	-0.728391	1.17844	-9.13118	0.902015	-4.61782	0.034098	-0.920314	0.778864	-5.09665	0.871473	-3.72605	0.116791	-6.10319	0.863413
(p.Leu.95.Glu)	L	95	E	var	3	-8.49484	1.13971	-4.40478	0.321542	-0.413498	0.81683	-8.57543	0.465333	-4.36825	0.0145895	-0.540043	0.553178	-4.88491	0.478732	-3.6167	0.0712914	-5.46707	0.364622
(p.Leu.95.Gly)	L	95	G	var	3	-6.43963	0.297844	-2.65782	0.364124	0.00812925	0.200556	-6.87759	0.0307941	-3.48851	0.198767	0.0443532	0.0209318	-4.6261	0.478765	-3.18299	0.0528607	-5.15816	0.666658
(p.Leu.95.His)	L	95	H	var	3	-5.21908	0.390686	-4.09189	0.449503	-0.652984	0.538541	-5.58075	0.328728	-4.00797	0.167918	-0.609442	0.467226	-4.2932	0.232159	-3.34233	0.00576509	-4.55723	0.483949
(p.Leu.95.Ile)	L	95	I	var	3	-3.27468	0.526096	0.247519	0.121287	0.313654	0.229588	-4.22524	0.0734101	-0.858632	0.891737	0.134214	0.0330669	-2.92883	0.140781	-0.805066	0.306867	-3.14991	0.539205
(p.Leu.95.Lys)	L	95	K	var	3	-10.1292	0.632165	-4.65368	0.49854	-0.44154	0.80249	-8.97684	1.00659	-4.96548	0.139326	-0.585272	0.668164	-4.8828	0.400327	-4.19367	0.816493	-5.46537	0.517035
(p.95.=)	L	95	L	syn	3	0.173094	0.00908902	0.175986	0.142192	0.128365	0.0425976	0.100866	0.0543269	0.165791	0.0745851	0.143364	0.00314717	0.125166	0.0529682	0.133875	0.122045	-0.0362411	0.220807
(p.Leu.95.Met)	L	95	M	var	3	-0.938852	0.345556	-0.011727	0.115698	0.0145549	0.0165369	-1.76681	0.594687	0.230029	0.00954555	0.102245	0.00141808	-1.30394	0.00398704	0.192095	0.0505319	-1.49493	1.10906
(p.Leu.95.Asn)	L	95	N	var	3	-7.69832	0.747776	-6.97767	0.614151	-0.316188	0.927844	-7.4625	0.109848	-6.69707	0.0509628	0.00216489	0.268723	-5.46994	0.744515	-4.20698	0.704115	-5.31196	1.24195
(p.Leu.95.Pro)	L	95	P	var	3	-5.06253	0.0265522	-3.72284	0.119785	-0.840063	0.975959	-5.14288	1.07897	-4.1509	0.260082	-0.846121	0.736781	-3.76052	0.07739	-3.24429	0.124378	-4.23092	0.246084
(p.Leu.95.Gln)	L	95	Q	var	3	-6.69609	2.4248	-2.42872	0.472241	-0.178749	0.348014	-7.1127	0.867147	-2.97429	0.413654	0.0442775	0.153266	-4.46274	1.28635	-2.70529	0.241391	-5.44892	1.12113
(p.Leu.95.Arg)	L	95	R	var	3	-7.21822	0.556987	-4.2595	0.243705	-0.627185	1.04565	-8.47058	0.165266	-4.63765	0.0530923	-0.764673	0.640719	-4.89981	0.413564	-3.58758	0.0779773	-5.49633	0.366285
(p.Leu.95.Ser)	L	95	S	var	3	-11.4604	0.599957	-2.53501	0.262662	-0.00327768	0.312198	-8.7028	0.554327	-3.36148	0.180603	0.0152639	0.134587	-4.94905	0.881093	-2.94466	0.179937	-5.7084	0.625806
(p.Leu.95.Thr)	L	95	T	var	3	-9.1753	1.70386	0.13026	0.242779	0.144313	0.0470418	-9.88289	0.149547	-3.64878	0.377875	0.12602	0.0838608	-4.85639	0.016969	-2.52937	0.649523	-5.34167	0.712528
(p.Leu.95.Val)	L	95	V	var	3	-4.18873	0.990276	0.220059	0.0843712	0.149018	0.0806621	-5.42659	0.00277696	0.175912	0.095815	0.0691245	0.0687538	-4.54368	0.355799	0.184695	0.0820582	-4.50547	1.38647
(p.Leu.95.Trp)	L	95	W	var	3	-10.2139	2.13665	-3.98343	0.242204	-0.715326	0.991234	-10.039	1.60563	-4.96717	0.162447	-0.782466	0.823354	-5.14038	0.819302	-3.83643	0.0904068	-5.57586	0.534928
(p.Leu.95.Tyr)	L	95	Y	var	3	-8.14855	0.698003	-7.4279	0.564378	-0.579351	1.21064	-8.08907	0.291317	-7.32364	0.130507	-0.480118	0.728762	-4.82435	0.780785	-4.01162	0.184461	-5.14605	0.180052
(p.Leu.96.Ter)	L	96	*	var	3	-7.56488	0.303691	-3.63483	0.523671	-0.791912	1.1238	-8.58205	0.522414	-5.32417	0.0158011	-0.702714	0.398328	-4.91857	0.988853	-3.5951	0.112567	-5.57438	1.58626
(p.Leu.96.Ala)	L	96	A	var	3	-9.2003	2.31785	-1.38591	0.498954	-0.0939994	0.471968	-8.03313	0.0726434	-4.84496	0.0544097	-0.265063	0.244241	-4.84155	0.628791	-3.72754	0.329646	-5.81795	0.228798
(p.Leu.96.Cys)	L	96	C	var	3	-9.76659	0.607035	-0.583948	0.236716	-0.0189086	0.280318	-9.59754	0.159195	-4.24714	0.00161504	-0.0654447	0.151414	-4.63176	0.225883	-2.3946	0.852834	-5.52424	0.628071
(p.Leu.96.Asp)	L	96	D	var	3	-8.94071	0.608263	-2.19888	0.208367	-0.509658	0.635865	-8.70455	0.401767	-5.06167	0.172674	-0.375304	0.222737	-5.10078	0.684207	-3.99558	0.229073	-5.26152	0.0505529
(p.Leu.96.Glu)	L	96	E	var	3	-4.47195	0.337179	-1.56871	0.772594	-0.0901405	0.628878	-6.17638	0.149467	-3.45751	0.210836	-0.0731424	0.421358	-4.15678	0.535455	-2.86921	0.125915	-5.08997	0.699923
(p.Leu.96.Phe)	L	96	F	var	3	-5.22976	0.703716	-0.334146	0.0163029	-0.205986	0.284589	-5.63201	0.780687	-0.593128	0.531315	-0.194244	0.159891	-4.06344	0.285638	-0.376949	0.216774	-4.49446	0.457814
(p.Leu.96.Gly)	L	96	G	var	3	-6.95894	0.0437561	-1.29556	0.336591	-0.197407	0.394829	-7.96162	0.597096	-4.40366	0.174415	-0.119468	0.252312	-4.83196	0.362899	-3.34783	0.158856	-5.63687	0.743598
(p.Leu.96.His)	L	96	H	var	3	-5.09124	0.390352	-0.957925	0.392338	-0.41942	0.539202	-4.83307	0.192272	-4.07694	0.132903	-0.36681	0.0390458	-3.86959	0.488181	-2.8735	0.203144	-4.37178	0.0301947
(p.Leu.96.Ile)	L	96	I	var	3	-1.53052	0.157269	-1.21713	0.110186	-0.541329	0.588684	-2.62886	0.705893	-1.11744	0.109501	-0.532653	0.507427	-1.84398	0.0384238	-1.20135	0.0568893	-2.15429	0.764898
(p.Leu.96.Lys)	L	96	K	var	3	-9.2511	0.596244	-0.99212	0.194489	-0.308048	0.320753	-8.94263	0.186013	-5.11255	0.389061	-0.132965	0.428243	-4.92061	0.787507	-3.98241	0.0866353	-6.27721	0.165201
(p.96.=)	L	96	L	syn	3	-1.06316	0.180654	-0.700696	0.12907	-0.407274	0.357299	-1.09328	0.0314918	-0.606053	0.0285943	-0.334797	0.194302	-0.905214	0.0266741	-0.589917	0.0467342	-1.08835	0.282005
(p.Leu.96.Met)	L	96	M	var	3	-0.538296	0.113607	-0.423607	0.154188	-0.308211	0.166301	-1.32144	0.587878	-0.345565	0.233561	-0.0227912	0.0313921	-1.05015	0.138943	-0.217966	0.0928342	-1.19456	0.535873
(p.Leu.96.Asn)	L	96	N	var	3	-8.29609	0.849168	-1.51015	0.457248	-0.27362	1.03095	-7.88525	0.574838	-5.82734	0.322017	-0.565248	0.678456	-5.16297	0.189725	-4.17029	0.0254131	-6.17697	2.12844
(p.Leu.96.Pro)	L	96	P	var	3	-4.84474	0.286556	-2.97773	0.325948	-0.930605	0.547926	-4.76593	0.337881	-3.73746	0.632346	-0.54927	0.398037	-3.70931	0.466301	-2.65923	0.100301	-4.10719	0.375024
(p.Leu.96.Gln)	L	96	Q	var	3	-6.44665	0.222282	-0.984636	0.172856	-0.516431	0.598889	-8.26505	0.188436	-2.15834	1.06821	-0.617652	0.185474	-5.74304	1.49215	-1.48053	0.417595	-5.21083	0.0102018
(p.Leu.96.Arg)	L	96	R	var	3	-8.68629	0.0280072	-2.09701	0.511966	-0.214484	0.377711	-8.01388	0.119421	-4.68494	0.377461	-0.28375	0.303618	-4.77724	0.500455	-3.47164	0.0937682	-5.45499	0.373678
(p.Leu.96.Ser)	L	96	S	var	3	-5.00844	0.404939	-0.410089	0.354667	0.156516	0.39174	-5.58267	0.0718547	-3.5662	0.231961	-0.214023	0.0281707	-4.03392	0.163169	-2.77311	0.137165	-5.09487	0.800902
[truncated: 3,551 more rows]

## Sheet: SF2B Single Variant EC50
Sample label			mutation info			fit results
row	column	antibiotic	pos	mut	codon	ec50 (ug/mL)	max	min	Hill coefficient
A	1	amp	55	G	GGG	142.496	0.963015	0.0329405	-7.25327
A	2	amp	55	G	GGG	158.549	0.941344	0.040295	-6.13295
A	3	amp	55	G	GGG	149.749	0.957401	0.0407852	-6.15138
A	5	amp	55	R	CGG	63.1484	0.980659	0.0313708	-7.57869
A	6	amp	55	R	CGG	63.4687	1.00722	0.0227273	-27.4576
A	7	amp	55	G	GGG	134.184	1.01709	0.0412271	-7.42323
A	8	amp	55	G	GGT	139.453	0.999901	0.0343206	-6.93514
A	9	amp	55	R	AGA	63.575	0.985082	0.0248252	-29.8614
A	10	amp	55	G	GGA	131.234	1.00769	0.036355	-25.2214
A	11	amp	55	G	GGG	131.655	0.987615	0.0358743	-22.266
A	12	amp	55	R	CGG	61.7644	0.8577	0.0215643	-30.8264
B	1	amp	62	G	GGC	95.4735	0.93853	0.0299807	-6.49298
B	4	amp	62	Q	CAA	64.8797	0.971229	0.0379155	-18.9921
B	5	amp	62	G	GGT	97.2255	0.991567	0.0374619	-7.03128
B	6	amp	62	A	GCC	68.2927	0.974717	0.0358861	-6.11657
B	7	amp	62	wt	wt	80.9391	0.997285	0.0332316	-5.87159
B	8	amp	62	D	GAC	90.4685	1.02891	0.0296723	-5.36998
B	9	amp	62	E	GAG	78.4901	1.00732	0.031223	-5.82212
B	10	amp	62	K	AAA	85.0937	1.05395	0.0256826	-6.14808
B	12	amp	62	T	ATT	99.7344	0.956388	0.0150095	-6.19588
C	1	amp	67	L	TTA	127.721	0.961244	0.040957	-28.8994
C	2	amp	67	V	GTG	126.376	0.926671	0.0438078	-4.79203
C	3	amp	67	L	TTA	95.687	0.963775	0.0490782	-6.79356
C	4	amp	67	V	GTA	122.137	1.016	0.0320597	-40.6461
C	5	amp	67	R	AGG	21.3767	1.00877	0.0208991	-5.75415
C	7	amp	67	V	GTT	126.483	1.05718	0.0395894	-25.8142
C	8	amp	67	G	GGG	14.6289	1.01045	0.0274777	-4.63617
C	9	amp	67	R	AGA	20.5472	1.03027	0.0183515	-5.37596
C	10	amp	67	V	GTG	127.772	1.00352	0.0652709	-29.2127
C	11	amp	67	E	GAG	127.235	0.984184	0.0493381	-27.9094
D	1	amp	68	G	GGG	126.892	0.968822	0.0386354	-25.4368
D	2	amp	68	wt	wt	77.1989	0.959041	0.0634051	-4.22674
D	3	amp	68	A	GCG	86.2844	0.962996	0.0484374	-5.52823
D	4	amp	68	A	GCG	80.3153	0.983768	0.0357698	-6.26111
D	5	amp	68	E	GAG	126.259	1.01031	0.0459318	-30.8231
D	6	amp	68	R	AGG	38.5916	0.974685	0.0165641	-4.55756
D	7	amp	68	V	GTC	90.8877	0.975644	0.037138	-6.2739
D	8	amp	68	G	GGG	128.063	1.05178	0.0379684	-31.5299
D	11	amp	68	G	GGT	121.656	0.996255	0.0406291	-27.7502
D	12	amp	68	G	GGG	125.216	1.00514	0.0322729	-32.9281
E	1	amp	205	G	GGC	35.1682	0.846351	0.0251535	-4.19279
E	3	amp	205	E	GAG	62.4559	0.989952	0.0796199	-22.9956
E	4	amp	205	V	GTC	101.804	0.983326	0.0416693	-5.68284
E	5	amp	205	S	TCG	166.419	1.02369	0.0609822	-6.63439
E	6	amp	205	Q	CAA	190.585	1.04425	0.0589233	-5.90457
E	7	amp	205	Q	CAG	243.576	1.04318	0.111336	-31.6446
E	8	amp	205	V	GTC	126.557	1.01871	0.0562038	-13.5031
[truncated: 187 more rows]

## Sheet: SF2C Linear Model Data
Labels			fitness scores			mutations		biophysical predictors									substitution matrix
[truncated: 4,566 more rows]

[truncated: 9 more sheets: SF2D Codon Fitness scores, SF2E signal peptide ddG, SF2F Temperature Dependence, SF2G Hydrogen bonds, SF2H globally positive variants, SF2I Specificity Variants, SF2J Natural Variants, SF2K Natural Variant Mutations, SF2L Amplicon Sequencing Primer]
