# Supplementary material for: Comprehensive exploration of the translocation, stability and substrate recognition requirements in VIM-2 lactamase
Source: eLife. 2020 Jun 8;9:e56707. doi: 10.7554/eLife.56707 (PMC7308095; doi:10.7554/eLife.56707)
Supplement: Supplementary file 3. — (A) Variants selected under 4.0 µg/mL CTX. (B) Variants selected under 0.031 µg/mL MEM. [file elife-56707-supp3.xlsx]

## Sheet: SF3A CTX linear model results
Supplementary Table 2. Linear model output for DMS fitness scores under 4.0 µg/mL CTX selection
Predictora		Estimated effectb	Adjusted P-value (α=0.05)c	Variance Explainedd
(Intercept)e		-1.4	< 0.001
ASAf		2.75	< 0.001	0.21
Rosetta ΔΔGg		-0.27	< 0.001	0.17
Starting(WT) residue	C	-1.81	< 0.001	0.1
	D	-0.98	< 0.001
	E	-0.58	< 0.001
	F	-0.61	< 0.001
	G	-0.65	< 0.001
	H	-1.11	< 0.001
	I	-0.4	< 0.001
	L	-0.43	< 0.001
	N	-0.96	< 0.001
	S	-0.27	0.003
	V	-0.44	< 0.001
	W	-1.54	< 0.001
Variant residue	C	-1.49	< 0.001	0.05
	D	-0.46	< 0.001
	E	-0.4	0.001
	G	-0.32	0.012
	P	-0.55	< 0.001
	W	-0.43	< 0.001
a) Each predictor indicates a class of wtVIM-2 derived values that were used as explanatory variables to model a linear relationship with the observed fitness score.
b) The estimated effect is the predicted change in fitness score away from the intercept with a 1 unit increase in a continuous predictor or a binary change in a categorical predictor.
c) P-values indicates whether a predictor makes a significant contribution to the change fitness score, and are adjusted for a false discovery rate of 5% using the Benjamini-Hochberg procedure.
d) The adjusted R2 of each predictor when correlated with fitness, which is a measure of how much variation in the fitness score can be explained by each predictor in the linear model.
e) The intercept is the average fitness of all variants where the continuous variable is 0 (ASA and Rosetta ΔΔG) and the wt or variant residue is Ala.
f) ASA ranges from 0.0 to 1.0.
g) Rosetta ΔΔG ranges from -5.0 to 5.0 Rosetta energy units

## Sheet: SF3B MEM linear model results
Supplementary Table 3. Linear model output for DMS fitness scores under 0.031 µg/mL MEM selection
Predictora		Estimated effectb	Adjusted P-value (α=0.05)c	Variance Explainedd
(Intercept)e		-1.3	< 0.001
ASAf		2.64	< 0.001	0.21
Rosetta ΔΔGg		-0.3	< 0.001	0.2
Starting(WT) residue	C	-1.8	< 0.001	0.1
	D	-1.01	< 0.001
	E	-0.61	< 0.001
	G	-0.78	< 0.001
	H	-1.2	< 0.001
	I	-0.48	< 0.001
	L	-0.52	< 0.001
	N	-0.59	< 0.001
	Q	-0.32	0.025
	R	-0.28	0.007
	S	-0.21	0.023
	V	-0.41	< 0.001
	W	-1.52	< 0.001
Variant residue	C	-1.6	< 0.001	0.05
	D	-0.47	< 0.001
	E	-0.34	0.006
	G	-0.33	0.009
	P	-0.52	< 0.001
	W	-0.42	0.001
a) Each predictor indicates a class of wtVIM-2 derived values that were used as explanatory variables to model a linear relationship with the observed fitness score.
b) The estimated effect is the predicted change in fitness score away from the intercept with a 1 unit increase in a continuous predictor or a binary change in a categorical predictor.
c) P-values indicates whether a predictor makes a significant contribution to the change fitness score, and are adjusted for a false discovery rate of 5% using the Benjamini-Hochberg procedure.
d) The adjusted R2 of each predictor when correlated with fitness, which is a measure of how much variation in the fitness score can be explained by each predictor in the linear model.
e) The intercept is the average fitness of all variants where the continuous variable is 0 (ASA and Rosetta ΔΔG) and the wt or variant residue is Ala.
f) ASA ranges from 0.0 to 1.0.
g) Rosetta ΔΔG ranges from -5.0 to 5.0 Rosetta energy units
